# Supplementary material for: Behavioural activation versus mindfulness-based guided self-help treatment administered through a smartphone application: a randomised controlled trial
Source: PubMed Central journal article supplement — BMJ Open. 2014 Jan 9;4(1):e003440. doi: 10.1136/bmjopen-2013-003440 (PMC3902198; doi:10.1136/bmjopen-2013-003440), 2014-01-09
Supplement: bmjopen-2013-003440.draft_revisions.pdf [file bmjopen-2013-003440.draft_revisions.pdf]

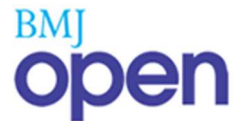

**Behavioral activation vs. Mindfulness-based guided self-help treatment administered through a smartphone application: a randomized controlled trial**

|                                 |                                                                                                                                                                                                                                                                                                                                                                                                                                                                                                                                                                                                                                                                                                                                                                                                          |
|---------------------------------|----------------------------------------------------------------------------------------------------------------------------------------------------------------------------------------------------------------------------------------------------------------------------------------------------------------------------------------------------------------------------------------------------------------------------------------------------------------------------------------------------------------------------------------------------------------------------------------------------------------------------------------------------------------------------------------------------------------------------------------------------------------------------------------------------------|
| Journal:                        | <i>BMJ Open</i>                                                                                                                                                                                                                                                                                                                                                                                                                                                                                                                                                                                                                                                                                                                                                                                          |
| Manuscript ID:                  | bmjopen-2013-003440                                                                                                                                                                                                                                                                                                                                                                                                                                                                                                                                                                                                                                                                                                                                                                                      |
| Article Type:                   | Research                                                                                                                                                                                                                                                                                                                                                                                                                                                                                                                                                                                                                                                                                                                                                                                                 |
| Date Submitted by the Author:   | 20-Jun-2013                                                                                                                                                                                                                                                                                                                                                                                                                                                                                                                                                                                                                                                                                                                                                                                              |
| Complete List of Authors:       | Ly, Kien Hoa; Linköping University, Department of Behavioral Sciences and Learning<br>Trüschel, Anna; Linköping University, Department of Behavioral Sciences and Learning<br>Jarl, Linnea; Linköping University, Department of Behavioral Sciences and Learning<br>Magnusson, Susanna; Linköping University, Department of Behavioral Sciences and Learning<br>Windahl, Tove; Linköping University, Department of Behavioral Sciences and Learning<br>Johansson, Robert; Linköping University, Department of Behavioral Sciences and Learning<br>Carlbring, Per; Stockholm University, Department of Psychology<br>Andersson, Gerhard; Linköping University, Department of Behavioral Sciences and Learning; Karolinska Institutet, Department of Clinical Neuroscience, Center for Psychiatry Research |
| <b>Primary Subject Heading</b>: | Mental health                                                                                                                                                                                                                                                                                                                                                                                                                                                                                                                                                                                                                                                                                                                                                                                            |
| Secondary Subject Heading:      | Public health                                                                                                                                                                                                                                                                                                                                                                                                                                                                                                                                                                                                                                                                                                                                                                                            |
| Keywords:                       | Depression, Smartphone application, Behavioral activation, Mindfulness                                                                                                                                                                                                                                                                                                                                                                                                                                                                                                                                                                                                                                                                                                                                   |
|                                 |                                                                                                                                                                                                                                                                                                                                                                                                                                                                                                                                                                                                                                                                                                                                                                                                          |

SCHOLARONE™  
Manuscripts

# Behavioral activation vs. Mindfulness-based guided self-help treatment administered through a smartphone application: a randomized controlled trial

Kien Hoa Ly<sup>§</sup>, Anna Trüschel<sup>1</sup>, Linnea Jarl<sup>1</sup>, Susanna Magnusson<sup>1</sup>, Tove Windahl<sup>1</sup>, Robert Johansson<sup>1</sup>, Per Carlbring<sup>2</sup>, Gerhard Andersson<sup>1,3</sup>

<sup>1</sup> Department of Behavioral Sciences and Learning, Linköping University, Linköping, Sweden

<sup>2</sup> Department of Psychology, Stockholm University, Stockholm, Sweden

<sup>3</sup> Department of Clinical Neuroscience, Center for Psychiatry Research, Karolinska Institutet, Stockholm, Sweden

<sup>§</sup> Corresponding author

Email addresses:

KHL: kien.hoa.ly@liu.se

AT: annr005@student.liu.se

LJ: linja498@student.liu.se

SM: susma302@student.liu.se

TW: tovwi961@student.liu.se

RJ: robert.johansson@liu.se

PC: per@carlbring.se

GA: gerhard.andersson@liu.se

## Article Summary

### 1) Article Focus

- It is well established that guided self-help interventions, administered through internet, can have positive effects on symptoms of depression. There are, however, to our knowledge no controlled trial on smartphone-delivered behavioral activation, neither on mindfulness.
- Both behavioral activation and mindfulness are components in multi-component treatment packages, and as such they might be easier to target in smartphone applications than an entire treatment program would be, due to the need of simple and fast interaction with the treatment program.

1  
2  
3 • The aim of this study was to test the effects of two smartphone-delivered treatments; one based  
4 on behavioral activation and the other on mindfulness. We expected that behavioral activation  
5 would be superior to mindfulness for participants suffering from more severe depression.  
6  
7

## 8 9 2) Key Messages

- 10 • This smartphone format works well for a depressed population.
- 11 • Behavioral activation might work better for a more severely depressed population, whereas  
12 mindfulness might work better for people suffering from light depression, at least in this  
13 smartphone format.
- 14 • Since smartphones likely will be integrated even further in society, they may be important in  
15 the future of making depression treatment and other psychological treatment more assimilated  
16 into people's daily life.

## 17 18 19 20 21 3) Strengths and Limitations.

- 22 • One of the first to do a randomized controlled trial using smartphone applications.
- 23 • Did not control for the different components separately, so we cannot determine which parts of  
24 the treatments were effective.

## 25 26 27 28 29 30 **Keywords**

31 Depression, Behavioral activation, Smartphone application, Mindfulness.  
32  
33

## 34 35 36 **Abstract**

### 37 **Objectives**

38 Evaluating the effectiveness of two smartphone-delivered treatments; one based on behavioral  
39 activation and the other on mindfulness.  
40  
41

### 42 43 **Design**

44 Parallel randomized controlled, open, trial. Participants were allocated using an online  
45 randomization tool ([www.random.org](http://www.random.org)), handled by an independent person who was separate  
46 from the staff conducting the study.  
47  
48

### 49 50 **Setting**

51 Open trial at a university psychological center in Sweden.  
52  
53

### 54 55 **Participants**

56 40 participants diagnosed with major depressive disorder received a behavioral activation  
57  
58  
59  
60

1  
2  
3 treatment, and 41 participants received a mindfulness treatment  
4  
5 9 participants were lost to the post-treatment.  
6  
7

### 8 **Intervention**

9  
10 Behavioral activation: A 8 week long behavior program administered via a smartphone  
11 application. Mindfulness: A 8 week long mindfulness program, administered via a smartphone  
12 application. □  
13

### 14 **Main outcome measures**

15  
16 The primary outcome measures were the Beck Depression Inventory-II (BDI-II) and the 9-item  
17 Patient Health Questionnaire Depression Scale (PHQ-9). □  
18  
19

### 20 **Results**

21  
22 81 participants (BA n=40; Mindfulness n=41) were randomized (mean age 36.0 years  
23 (SD=10.8)). All were included in the intention to treat analysis. Within-group effects from pre-  
24 measurement to post-measurement on BDI-II were  $d=1.83$  CI [0.27-3.38] and  $d=1.21$  CI [-0.95-  
25 3.38] for the behavioral activation treatment and mindfulness treatment respectively. From pre-  
26 measurement to 6-month follow-up, effects were  $d=1.19$  CI [-0.87-3.24] and  $d=1.09$  CI [-1.32-  
27 3.50] respectively.  
28  
29  
30

### 31 **Conclusions**

32  
33 The large within-group effects on the primary outcome measures, as well as the large recovery  
34 rates for both groups, indicate that this smartphone format works well for a depressed population.  
35  
36  
37

### 38 **Trial registration**

39  
40 Clinical Trials NCT01463020.  
41  
42

### 43 **Funding**

44  
45 The Swedish Research Council, 2011-2476  
46  
47

## 48 **Background**

49  
50 Major depressive disorder (MDD) is a major health problem, which lowers the quality of life for  
51 the individual and generates enormous costs for society<sup>1,2</sup>. Several forms of psychotherapy have  
52 been found to be effective in the treatment of MDD<sup>3</sup>. For example, behavioral activation has an  
53 established empirical base<sup>4</sup>. The efficacy of behavioral activation for treating MDD has been  
54 established in a number of studies over the past four decades<sup>5</sup>. Moreover, a dismantling study  
55 showed that behavioral activation could be as effective as the full cognitive behavior therapy  
56 (CBT) treatment package<sup>6</sup>. In addition, a series of reviews and meta-analyses also show that  
57  
58  
59  
60

1  
2  
3 behavioral activation is at least as effective as the full CBT packages that include both cognitive  
4 and behavioral components<sup>4</sup>. In a later study, behavioral activation was found to be as effective  
5 as antidepressant medication<sup>7</sup>.  
6  
7

8  
9 It is also well established that guided self-help interventions, administered through internet, can  
10 have positive effects on symptoms of depression<sup>8-10</sup>. An increasing number of studies show that  
11 this treatment format can be as effective as face-to-face treatment for mild to moderate MDD and  
12 anxiety disorders<sup>9</sup>. Guided treatments distributed digitally have provided a way to reach out to  
13 more patients in a manner that in most cases requires less therapist time than face-to-face  
14 psychotherapy<sup>11</sup>. There are, however, to our knowledge no controlled trial on internet-delivered  
15 pure behavioral activation, and no study using smartphones for the delivery of behavioral  
16 activation, even if studies are being conducted on smartphone-administered CBT<sup>12</sup>.  
17  
18

19  
20 An important feature of mobile technology is the possibility for the therapist to reach the patient  
21 outside of the therapy room or when not sitting in front of the computer, and thus create direct  
22 incentives for behavior change in the patient's everyday life<sup>13</sup>. Therefore, behavioral activation  
23 is a treatment that could benefit from the use of new mobile technologies (for example  
24 smartphones) by creating direct incentives for behavioral activation in patient's everyday life.  
25  
26

27  
28 The same applies for mindfulness. Mindfulness is often a component in the so called third wave  
29 of CBT, such as mindfulness-based cognitive therapy (MBCT;<sup>14</sup>), dialectical behavior therapy  
30 (DBT;<sup>15</sup>), and acceptance and commitment therapy (ACT;<sup>16</sup>). Studies have shown a significant  
31 negative correlation between mindfulness and depression<sup>17 18</sup>. Moreover, a meta-analysis based  
32 on 39 studies of mindfulness for depression and anxiety showed a moderate effect size of  
33 Hedges's  $g=0.59$  for improving mood symptoms<sup>19</sup>. The analysis also showed that mindfulness  
34 was effective for individuals with depression as both the primary diagnosis and the secondary.  
35 Moreover, mindfulness has been shown to be effective in relapse prevention in depression<sup>20</sup>.  
36 Within digitally distributed treatments, mindfulness has appeared as a component in CBT-based  
37 internet treatments, but there have so far been few studies on mindfulness as a stand-alone,  
38 digitally distributed treatment for depression<sup>21</sup>.  
39  
40  
41  
42

43 The advantages as well as the challenges of using mobile phones in CBT have been summarized  
44 by Boschen and Casey<sup>13</sup>. One challenge with using the mobile phone as a platform for  
45 psychological treatment is that the user must be able to interact with the program in an easy way  
46<sup>13</sup>. Both behavioral activation and mindfulness are components in multi-component treatment  
47 packages, and as such they might be easier to target in smartphone applications than an entire  
48 treatment program would be, due to the need of simple and fast interaction with the treatment  
49 program.  
50  
51

52  
53 At the same time, research suggests that depression severity is known to be a significant  
54 moderating factor in the treatment of depression. For example, some initial evidence suggests  
55 that there is a difference in efficacy between two forms of CBT in the treatment of the more  
56 severely depressed patients<sup>7 22</sup>. There are also indications that the difference between  
57  
58  
59  
60

1  
2  
3 antidepressant medication and placebo is evident in severe depression, but not in mild to  
4 moderate depression<sup>23</sup>, and that combined treatments with medication and psychotherapy are  
5 more effective than single treatments<sup>22</sup>. These results suggest that baseline depression severity  
6 may moderate the response to different variants of treatments. Thus, it is concluded that different  
7 treatments distributed digitally can target different subgroups of depression, in terms of severity.  
8 For example, Dimidjian et al. (2006) found that among more severely depressed patients,  
9 behavioral activation was comparable to antidepressant medication, and significantly  
10 outperformed cognitive therapy, whereas for the less severely depressed patients, no differential  
11 treatment effects were observed.  
12  
13

14  
15  
16 The aim of this study was to test the effects of two smartphone-delivered treatments; one based  
17 on behavioral activation and the other on mindfulness. The study was based on our previous  
18 work on guided internet-treatment for depression<sup>24</sup>, but in the current study the treatment  
19 content was delivered entirely via the participants personal smartphone, using recently developed  
20 smartphone applications. We expected, in line with Dimidjian and coworkers' conclusions (BA  
21 relative to CT  $d=0.87$  on BDI), that behavioral activation would be superior to mindfulness for  
22 participants suffering from more severe depression with an expected between group effect size of  
23 Cohen's  $d=0.50$ ). In order to evaluate long-term effects, we also included a 6-month follow-up  
24 after the start of the treatment.  
25  
26  
27

## 28 **Methods**

### 29 **Ethics statement**

30  
31 The study was approved by the Regional Ethics Board of Linköping, Sweden. Written informed  
32 consent was obtained from all participants by surface mail.  
33  
34  
35

### 36 **Recruitment and selection**

37  
38 The participants were mainly recruited via mass media and advertisements in large Swedish  
39 newspapers. Those who were interested were directed to a web page with information about the  
40 study, the treatments being tested and how to participate in the study.  
41  
42  
43

44 Inclusion criteria for the study were a) being at least 18 years old, b) having a point total of  $\geq 5$  on  
45 PHQ-9, c) reported unchanged dosage of medication for depression and anxiety during the last  
46 month, d) not being in any concurrent psychological treatment, e) not suffering from a severe  
47 comorbid psychiatric condition that could interfere with the treatment (e.g. bipolar disorder or  
48 schizophrenia, assessed during a clinical interview), f) not having other primary medical  
49 problems which would need other treatments first hand, g) not having severe alcohol problems  
50 and h) major depression according to the DSM-IV, with at least an episode in partial remission.  
51 The diagnosis of MDD was confirmed by a structured interview (see below). The interviews  
52 were made over telephone by four MSc clinical psychology students. The principal research  
53 executive reviewed all the protocols from the interviews together with the interviewers.  
54 Questions regarding medication and psychiatric history that came up in the interview were  
55 considered before the decision on inclusion was made.  
56  
57  
58  
59  
60

1  
2  
3  
4  
5 Of the 231 individuals who initially expressed interest in the study, 126 completed all the  
6 questions in the online screening. Of these, 29 were excluded before the telephone interview  
7 started. 13 individuals were excluded after the telephone interview. Eighty-four were  
8 subsequently included after the interview had been conducted. Before the study started, three  
9 participants chose not to participate in the study. The reasons for exclusion are specified in the  
10 flowchart found in Figure 1.  
11  
12

13  
14 Among the randomized participants there were 70.3 % women ( $n=57$ ) and 29.6 % men ( $n=24$ ).  
15 The mean age was 36.0 years ( $SD=10.8$ ) ranging from 20 to 61 years. See Table 1 for additional  
16 demographical data. There were no significant differences in demographic characteristics  
17 between the groups according to chi-square analysis.  
18  
19

## 20 21 **Outcome measures**

22 **Primary outcome measures.** The primary outcome measures were the Beck Depression  
23 Inventory-II (BDI-II; <sup>25</sup>) and the 9-item Patient Health Questionnaire Depression Scale (PHQ-9;  
24 <sup>26 27</sup>) that were administered pre-treatment, at post-treatment and also six months after the  
25 treatment had ended. The PHQ-9 was also administered on a weekly basis during the entire  
26 treatment phase.  
27  
28

29  
30 **Secondary outcome measures.** In addition to the BDI-II and PHQ-9, the Beck Anxiety  
31 Inventory (BAI; <sup>28</sup>), the Quality of Life Inventory (QOLI; <sup>29 30</sup>), the Trimbos and Institute of  
32 Medical Technology Assessment Cost Questionnaire for Psychiatry (TIC-P; <sup>31</sup>) and the  
33 Acceptance and Action Questionnaire (AAQ-II; <sup>32</sup>) were administered. All other outcome  
34 measures were collected at pre-treatment, post-treatment and at 6-month after the start of the  
35 treatment, except for the TIC-P that was collected at pre-treatment and at 6-month after the  
36 treatment started.  
37  
38

39  
40 **Clinician-administered measures.** Psychiatric diagnoses were assessed using the Mini-  
41 International Neuropsychiatric Interview (M.I.N.I.; <sup>33</sup>). The M.I.N.I. is a diagnostic interview  
42 that, in contrast to several other diagnostic interviews, is completely structured, making it  
43 appropriate for other assessors than experienced psychiatrists <sup>33</sup>. All interviews were conducted  
44 by the four psychology students described above, who at post-treatment were blind to  
45 participant's condition. At the 6-month follow-up, the interviews were conducted by other  
46 clinical psychology students who were blind to both the participant's condition and the treatment  
47 they had been given. Recovery rates were defined as no longer fulfilling the criteria for  
48 depression according to M.I.N.I.  
49  
50

51  
52  
53 **Credibility.** The credibility of the two treatments showed a mean score of 31.9 ( $SD=7.1$ ) for the  
54 behavioral activation group and at 32.1 ( $SD=7.8$ ) for the mindfulness group on the Borkovec and  
55 Nau c-Scale <sup>34</sup>.  
56  
57  
58  
59  
60

## Procedure and design

For those participants included in the study, the results from the online screening were used as pre-treatment assessment. All measures used have been shown to have good psychometric properties, with internal consistencies of at least  $\alpha=.79$ . Details of this can be found in the respective references of the outcome questionnaires. The outcome measures used have established good psychometric properties, also when administered via the internet<sup>35 36</sup>.

After the recruitment, participants were allocated using an online randomization tool ([www.random.org](http://www.random.org)), handled by an independent person who was separate from the staff conducting the study.

## The interventions

**Behavioral activation treatment.** An 8-week smartphone-based behavioral activation intervention with minimal therapist contact was developed by our research group. The intervention consisted of a short web-based psychoeducation, and a step-by-step behavior program administered via a smartphone application. The psychoeducation aimed to introduce the participants to the treatment, touching on topics like the prevalence of depression, its etiology and maintenance factors based on operant conditioning, as well as the theoretical basis for behavioral activation. The text was written specially for the current intervention, but inspired by Martell et al.<sup>37</sup> and Lejuez, Hopko & Hopko<sup>38</sup>. In all, there were three chapters, totaling 11 pages of text, containing 3 893 words.

The smartphone application was built as a native application for Iphone and a mobile web application for other smartphones. See Figure 2 for a screenshot of the application. A prototype of the smartphone application was tested in a pilot study<sup>39</sup>. This prototype, however, was not specifically designed for depression interventions. The purpose of the behavioral activation application was to make it easy for the participant to remember and register important behaviors, in order to increase everyday activation. The application contained a database of 54 behaviors, divided into three different areas for the participant to add to their application. See Table 2 for the list of behaviors from the database. The database aimed to provide suggestions, help, and inspiration to get started with the application. Participants were also able to add their own areas and behaviors into the application to start tracking. Through the initial psychoeducation, the participants were guided to add few (between two and four) and easy behaviors from start, mainly from the database.

When a behavior was completed, the participant could mark this in the application and add a short reflection. Statistics and summaries of quantitative (i.e. behavior frequency) and qualitative data (i.e. reflections) were presented in the application for the participant.

There was also a back-end system where all the quantitative and qualitative data from the participants was accessible for the therapist. From the back-end system, the therapist could send short text messages to the participants via a messaging system, similar to Short Message Service



1  
2  
3 (SMS). The messaging system was used by the therapists to send personal encouraging messages  
4 every other, or every third day to the participants, as well as weekly general educational  
5 messages. The system functioned as a one-way communication, which means that the  
6 participants were not able to reply the messages.  
7  
8  
9

10 Apart from this, the participants were told to write a reflection to summarize every week for their  
11 therapist and send it in via e-mail, in the end of every treatment week. The participants received  
12 personal feedback on their reflection from their therapist.  
13  
14

15 **Mindfulness treatment.** The mindfulness intervention, also an 8-week smartphone-based  
16 intervention with minimal therapist contact, consisted of a short web-based psychoeducation, and  
17 a step-by-step mindfulness practice program, administered via a smartphone application. The  
18 psychoeducation for the mindfulness intervention was equivalent to that of the behavioral  
19 activation intervention, except that the theoretical basis of mindfulness was presented instead of  
20 the theoretical basis of behavioral activation. The text was written specially for the current  
21 intervention, but inspired by<sup>40</sup>. In all, there were three chapters, totaling 9 pages of text,  
22 containing 2 927 words.  
23  
24  
25  
26

27 The smartphone application for Iphone was an established and commercially available  
28 application that could be downloaded from the Apple app store. See Figure 3 for a screenshot of  
29 the application. For other smartphones, a mobile web application was built especially for the  
30 current study with the aim of mimicking the Iphone application. The application consisted of a  
31 number of audio tracks with exercises to facilitate the practice of mindfulness. The exercises  
32 were both guided and unguided, and in short (three minutes) and long (30 minutes) format.  
33 Through the initial psychoeducation, the participants were guided to start with short mindfulness  
34 exercises.  
35  
36  
37

38 Since the mindfulness application did not have a communication system such as the behavioral  
39 activation application, e-mails were used to emulate the messaging system in the behavioral  
40 activation application. Hence, the therapists sent encouraging messages every other, or every  
41 third day to the participants, as well as weekly general educational messages via mail.  
42  
43  
44

45 Additionally, the participants given the mindfulness intervention were also told to write a  
46 reflection to summarize every week for their therapist. The participants received personal  
47 feedback on their reflection from their therapist.  
48  
49  
50

51 **Therapists.** The therapists were four final-semester students from a five-year M.Sc. clinical  
52 psychologist program. All therapists had completed their clinical training as well as 16 weeks of  
53 internship. Each therapist was responsible for the treatment of 8 to 10 participants from the  
54 behavioral activation group and an equal number of participants from the mindfulness group.  
55 Therapists were randomly allocated to participants, with the restriction of not having more than  
56 10 participants from each group. For the entire duration of the study the therapists received  
57  
58  
59  
60

1  
2  
3 continuous supervision from an experienced psychotherapist with CBT orientation, who had  
4 previous experience of working with a behavioral activation treatment manual.  
5  
6

### 7 8 **Subgroups based on cut-off scores**

9 All randomized participants were classified into groups of either high or low severity of  
10 depression. These classes were formed based on the cut-offs scores on the PHQ-9. The  
11 participants were considered to suffer from higher severity of depression if they scored  $\geq 10$  on  
12 PHQ-9 and if they fulfilled the criteria for an ongoing primary diagnosis of major depression of  
13 moderate character ( $n=51$ ). Participants, not fulfilling these criteria were considered to suffer  
14 from lower severity of depression ( $n=30$ ).  
15  
16

### 17 18 **Data analysis**

19 All analyses were performed using SPSS 20 (SPSS, Inc., Chicago, IL). Independent t-tests and  
20  $\chi^2$ -tests were used to test for group differences in demographics, pre-treatment data and in  
21 clinical significant improvement. Differences between the behavioral activation treatment and  
22 the mindfulness treatment were primarily investigated by modeling interaction effects of group  
23 and time. For the PHQ-9, where weekly measures were available, the continuous outcome  
24 variable was analyzed using mixed effects models, given their ability to handle missing data<sup>41</sup>.  
25 Random intercept models were selected. Also, several models were compared using available  
26 information criteria, and the model with best fit was chosen. The covariance between the random  
27 intercept and slope was not significant, and therefore was not included in the model. Error terms  
28 across time were modeled with a first-order autoregressive covariance structure with  
29 heterogeneous variances. Differences in average rates of growth between the two groups were  
30 examined by a fixed effects interaction between group and time. Between-group differences at  
31 post-treatment were analyzed using independent t-tests. Power analysis indicated an 89% chance  
32 of detecting a between-group effect size of  $d=0.60$  ( $\alpha$  level=0.05). Within- and between-group  
33 effect sizes (Cohen's  $d$ ) were calculated by dividing the differences in means by the pooled  
34 standard deviations<sup>42</sup>.  
35  
36  
37  
38  
39  
40  
41

## 42 **Results**

43 The two groups did not differ significantly on any of the measures at pretreatment ( $t=0.50$  to  
44  $0.67$ ,  $df=79$ ,  $p=0.78$  to  $0.50$ ). The results will be presented in the following order: attrition and  
45 adherence, self-report inventories (including effect size) both for the whole sample and the  
46 subgroups, recovery rates and treatment credibility.  
47  
48

### 49 **Attrition and adherence**

50 Of the 84 participants randomized, three participants decided not to participate in the study. Nine  
51 out of these 81 participants (11.1 %) did not provide post-treatment data. Six out of these  
52 (totaling 7.4 %) were unreachable for the telephone interview and were classified as unimproved.  
53 In the 6-month follow-up, 69 participants from the two treatment groups (85.2 %) provided data  
54 on the self-report measures and 59 (72.8 %) were reached for the telephone interview. Once  
55 again, those unreachable were classified as unimproved.  
56  
57  
58  
59  
60

1  
2  
3  
4  
5 Adherence to treatment was defined as the number of weekly reflections the participants sent to  
6 their therapist. In order to be considered as a completed week, at least one reflection had to have  
7 been sent to the therapist during that week. Of the 81 participants, 57 (70 %) succeeded to adhere  
8 to all the eight weeks. Of these, 25 (63 %) were in the behavioral activation group and 32 (78 %) were in the mindfulness group. In average, participants succeeded to adhere to six weeks ( $M=5.8$ ,  $SD=2.47$ ).

### 14 Primary outcome measure

15 No significant interaction effects of group and time on the PHQ-9 and the BDI-II were found  
16 between the groups, neither from pre-treatment to post-treatment, nor from pre-treatment to the  
17 6-month follow up. However, as evident from Table 3, large within-group effect sizes were  
18 found on PHQ-9 and BDI-II, between pre-treatment and post-treatment, as well as between pre-  
19 treatment to the 6-month follow up. This was the case for both the behavioral activation  
20 treatment and the mindfulness-treatment.  
21  
22

### 24 Subgroup analyses

25 A mixed-effects model analysis on the PHQ-9 revealed significant interaction effects of group  
26 and time in favor for the behavioral activation group. Thus, the results indicated a difference  
27 between the groups from pre-treatment to 6-month follow-up ( $F(1, 362.1)=5.2$ ,  $p's<.05$ ). As seen  
28 in Table 3, the effect size between the groups at 6-month follow-up was small, but close to  
29 medium (Cohen's  $d=0.47$ ; CI [-1.46, 2.40]).  
30  
31  
32  
33

34 For the more mildly depressed participants there was a significant effect in favor of the  
35 mindfulness group from pre-treatment to 6-month follow-up on PHQ-9 ( $F(1, 69.3)=7.7$ ,  
36  $p's<.01$ ). The effect size between the groups at 6-month follow-up was, as evident from Table 3,  
37 large (Cohen's  $d=0.96$ )  
38  
39  
40

### 41 Secondary outcome measure

42 As evident from Table 3 no significant interaction effects were found on the secondary measures  
43 neither from pre-treatment to post-treatment, nor from pre-treatment to the 6-month follow up.  
44 Nevertheless, as shown in table 3, medium to large within-group effect sizes were revealed on all  
45 secondary outcome measures. This was evident for both groups, and on pre-treatment to post-  
46 treatment, as well as on pre-treatment to the 6-month follow up.  
47  
48  
49

### 50 Recovery rates

51 There were no significant differences in recovery rates between the groups, neither at post-  
52 treatment nor at the 6-month follow-up. This was the case both when analyzing the whole sample  
53 as well as the subgroups. When analyzing the whole sample, 73.5 % ( $n=25$ ) in the behavioral  
54 activation group recovered after treatment, compared to 53.1 % ( $n=17$ ) in the mindfulness group  
55 ( $\chi^2(N=66, df=1)=2.97$ ,  $p=.071$ ). At the 6-month follow-up, 30 out of 34 participants (88.2 %)  
56  
57  
58  
59  
60

1  
2  
3 from the behavioral activation group had recovered, and 26 out of 32 participants (81.3 %) from  
4 the mindfulness group had recovered ( $\chi^2(N=66, df=1)=.63, p=.327$ ).

5  
6  
7  
8 When analyzing only the severe depressed participants, there was a tendency in favor for the  
9 behavioral activation group. Among the severely depressed participants, 73.9 % ( $n=17$ ) in the  
10 behavioral activation group recovered after treatment, compared to 50.0 % ( $n=14$ ) in the  
11 mindfulness group ( $\chi^2(N=51, df=1)=3.03, p=.072$ ). At the 6-month follow-up, 21 out of 23  
12 participants (91.3 %) from the behavioral activation group had recovered, and 22 out of 28  
13 participants (78.6 %) from the mindfulness group had recovered ( $\chi^2(N=51, df=1)=1.55, p=.197$ ).

### 14 15 16 17 **Credibility and therapist time**

18 An independent t-test showed no significant difference between the two groups on the C-scale ( $t$   
19 ( $78$ )= $0.12, p=0.90$ ). Furthermore, the C-scale did not correlate significantly with any of the  
20 outcome measures, either for all participants combined ( $r=0.13, p=0.27$ ), for the behavioral  
21 activation group ( $r=0.01, p=0.92$ ) or for the mindfulness group ( $r=.23, p=.18$ ).

22  
23  
24  
25 The therapist time per participant and week varied depending on whether the participant had sent  
26 a reflection or not. The therapists reported a span between 2 and 18 minutes per week and  
27 participants. However, the therapist time did not differ between the two treatment groups.

### 28 29 30 31 **Discussion**

32 The overall aim of this study was to investigate the effects of two smartphone-delivered  
33 treatments for people suffering from mild to moderate major depression; one based on behavioral  
34 activation and the other on mindfulness. When analyzing the whole sample as one entity, the  
35 result showed that the two interventions were effective for treating depression with large within-  
36 group effect sizes and large recovery rates, but that they did not differ significantly from one  
37 another; neither from pre-treatment to post-treatment, nor from pre-treatment to the 6-month  
38 follow-up on any of the outcome measures. Also, there were no significant differences in  
39 recovery rates between the groups, neither at post-treatment nor at the 6-month follow-up.

40  
41  
42  
43  
44 This study also explored how different levels of initial depression severity could moderate  
45 response to the different interventions. All randomized participants were classified into either  
46 high or low severity of depression based on the cut-offs scores on the PHQ-9 and if they fulfilled  
47 the criteria for an ongoing primary diagnosis of major depression. For participants with higher  
48 severity of depression, the treatment based on behavioral activation was superior to the treatment  
49 based on mindfulness, as measured with PHQ-9. In contrast, for participants with lower initial  
50 severity, the treatment based on mindfulness worked better than the treatment based on  
51 behavioral activation.

52  
53  
54  
55 The result from the analysis of the higher severity participants is in line with earlier<sup>7</sup> findings.  
56 For example, Dimidjian et al (2006) showed that behavioral activation was comparable in  
57  
58  
59  
60

1  
2  
3 efficacy to antidepressant medication, and more efficacious than cognitive therapy - but only  
4 among those patients who were more severely depressed. In line with this, Beck and colleagues  
5<sup>43</sup> have long suggested that therapists should focus on behavioral strategies early in treatment  
6 when patients are more depressed and return to that emphasis later if patients start to worsen.  
7  
8

9 The result from the analysis of the less severely depressed participants was unexpected to us.  
10 Although there is yet only initial evidence that mindfulness treatment is effective for acute or  
11 severely depressed<sup>44 45</sup>, mindfulness has proven to be effective for relapse prevention of  
12 depression<sup>20 46 47</sup>. That gives implications that a mindfulness-based treatment administered  
13 through smartphone will work better for people suffering from mild depression. However, the  
14 fact that the mindfulness-based treatment worked significantly better than the behavioral  
15 activation-treatment was surprising to us. One explanation could be that the less severely  
16 depressed participants suffered more from stress and anxiety rather than depression. This  
17 population would then not be in need of a treatment that encourages more activation. Instead, a  
18 mindfulness treatment could work very well for this kind of problems<sup>19 48</sup>.  
19  
20  
21  
22  
23

## 24 Limitations

25 There are a number of limitations that need to be mentioned. The first and is that it is impossible  
26 to determine which parts of the treatments were effective. Since we did not control for the  
27 different components separately, we cannot, for example, rule out that the result was mainly an  
28 effect of the therapist support. An additional treatment arm with only therapist support would  
29 make it possible to rule out this question.  
30  
31

32 A second limitation is that the study was underpowered. Thus, it is difficult to detect significant  
33 overall differences between the two smartphone-treatments, even if significant interaction effects  
34 were found when using mixed effects models with PHQ-9 in the subgroup analyses. A post-hoc  
35 power analysis revealed that a sample of 393 participants was required to detect small between-  
36 group effects.  
37  
38

39 A third limitation was that the participants were recruited nationally through mass media and  
40 advertisements. Thus, we cannot be sure that this treatment would work in a clinical setting, e.g.  
41 an outpatient psychiatric facility. However, mean depression severity as measured by the BDI-II  
42 at intake ( $M=24.10$ ) is rather close to the limit of 29 proposed for defining severe depression<sup>25</sup>.  
43  
44

45 Fourth, we recruited a broad range of participants, with regards to the severity of depression (a  
46 minimum of 8 and a maximum of 44 on BDI-II at intake). This makes it difficult to target a  
47 specific group for whom the treatments would be effective. Nevertheless, a subgroup analysis  
48 showed that participants with higher severity of depression responded to the behavioral  
49 activation significantly better than the treatment based on mindfulness, whereas the treatment  
50 based on mindfulness worked significantly better than the treatment based on behavioral  
51 activation for the participants with lower initial. Additionally, it can be argued that these broad  
52 inclusion criteria reflect a real population of individuals with depressive disorders.  
53  
54

55 A fifth related concern was the large number of participants who had college- or university level  
56 education (65.5 %). This might bias generalizability of the results, since it is possible that guided  
57 self-help is especially well suited for educated clients. However, there are data indicating that 50  
58  
59  
60

1  
2  
3 % of patients seeking psychotherapy have some college education<sup>49</sup> and that educated patients  
4 may be more inclined to seek help for mental health problems<sup>50</sup>.  
5  
6

7 Some clinical implications of this study are discussed as follows. Due to the need for simple and  
8 fast interaction with the treatment program, singular treatment components such as behavioral  
9 activation and mindfulness might be a better target for smartphone applications than entire multi-  
10 component treatment packages. At the same time, there is a need for guided self-help treatments  
11 distributed digitally that can reach out to more patients. This study is one of the first to test a  
12 treatment for depression, administered via smartphone. The large within-group effects on the  
13 primary outcome measures, as well as the large recovery rates for both groups, indicate that this  
14 smartphone format with a small amount of text and minimal therapist support, works well for a  
15 depressed population.  
16  
17

18  
19 Moreover, this study also shows that behavioral activation might work better for a more severely  
20 depressed population, whereas mindfulness might work better for people suffering from light  
21 depression. These results strengthen the hypothesis that different treatments distributed digitally  
22 can target different subgroups of depression, in terms of severity.  
23  
24

25 From a broader perspective, we believe that smartphones will be integrated even further in  
26 society since they are already socially accepted as well as relatively cheap for the functionalities  
27 you get<sup>13</sup>, and therefore may serve an important role in health care. Therefore these results,  
28 showing that mild to moderate depression can be treated effectively by means of a supported  
29 smartphone-application, might be important in the future of making depression treatment and  
30 other psychological treatment more assimilated into people's daily life. As suggested in Ly et al.  
31 (2012), the smartphone format might also help increasing the awareness of being in treatment in  
32 everyday settings, and therefore better help clients create direct incentives for treatment related  
33 activities in their everyday life<sup>39</sup>. Using smartphones to distribute psychological treatment might  
34 also help making it possible to reach out with psychological therapy to a broader group of  
35 people, since their use attracts no attention<sup>13</sup>, allowing users to interact with a device without  
36 fear of judgment or stigma. Lastly, psychological treatments distributed via smartphones are not  
37 only relevant for Swedish conditions but also for the developing countries in the world, which  
38 increasingly are empowered by mobile phones with internet connection.  
39  
40  
41

42 This study might open up for a broad range of other trials conducted via smartphones, both for  
43 self-help interventions as well as adjunct tools in face-to-face treatments. We believe that a  
44 substantial part of internet-based interventions in the future will be executed through  
45 smartphones or at least supported by smartphones. Further studies should focus on both formats,  
46 as well as expanding the treatment platform to other psychological disorders.  
47  
48  
49  
50  
51  
52  
53  
54  
55  
56  
57  
58  
59  
60

## Trial registration

Clinical Trials NCT01463020

## Competing interests

A related version of the behavioral activation application is currently developed for the open market by KHL.

## Author's contributions

KHL was the project manager and has developed the application. KHL also participated in the drafting of the treatment manuals, and participated in analysis and interpretation of data. GA participated in the conception of the study and its design. GA also participated in the drafting of treatment manuals, analysis and interpretation of data, and performed statistical analysis. PC participated in the conception of the study and its design. RJ participated in analysis and interpretation of data, and performed statistical analysis. AT, LJ, SM and TW participated in the drafting of treatment manuals and performed the treatments. KHL and GA drafted the current manuscript. PC and RJ participated in revision of the current manuscript. All authors read and approved the final manuscript.

## Trial protocol

The full trial protocol can be found at: <http://www.trialsjournal.com/content/13/1/62>

## Funding

The Swedish Research Council sponsored this study with funding. 2011-2476

## References

1. Ebmeier K, Donaghey C, Steele J. Recent developments and current controversies in depression. *Lancet* 2006;367:153 - 67.
2. Smit F, Cuijpers P, Oostenbrink J, Batelaan N, de Graaf R, Beekman A. Costs of nine common mental disorders: implications for curative and preventive psychiatry. *J Ment Health Policy Econ* 2006;9:193 - 200.
3. Cuijpers P, van Straten A, Andersson G, van Oppen P. Psychotherapy for depression in adults: a meta-analysis of comparative outcome studies. *J Consult Clin Psychol* 2008;76(6):909-22.
4. Cuijpers P, van Straten A, Warmerdam L. Behavioral activation treatments of depression: a meta-analysis. *Clin Psychol Rev* 2007;27:318 - 26.
5. Dimidjian S, Barrera M, Martell C, Munoz R, Lewinsohn P. The origins and current status of behavioral activation treatments for depression. *Annu Rev Clin Psych* 2011;7:1 - 38.
6. Jacobson N, Dobson K, Truax P, Addis M, Koerner K, Gollan J, et al. A component analysis of cognitive-behavioral treatment for depression. *J Consult Clin Psych* 1996;64:295 - 304.
7. Dimidjian S, Hollon SD, Dobson KS, Schmalzing KB, Kohlenberg RJ, Addis ME, et al. Randomized trial of behavioral activation, cognitive therapy, and antidepressant medication in the acute treatment of adults with major depression. *J Consult Clin Psychol* 2006;74(4):658-70.
8. Andrews G, Cuijpers P, Craske MG, McEvoy P, Titov N. Computer Therapy for the Anxiety and Depressive Disorders Is Effective, Acceptable and Practical Health Care: A Meta-Analysis. *PLoS ONE* 2010;5(10):e13196.
9. Cuijpers P, Donker T, van Straten A, Li J, Andersson G. Is guided self-help as effective as face-to-face psychotherapy for depression and anxiety disorders? A systematic review and meta-analysis of comparative outcome studies. *Psychol Med* 2010;40(12):1943-57.
10. Carlbring P, Hagglund M, Luthstrom A, Dahlin M, Kadowaki A, Vernmark K, et al. Internet-based behavioral activation and acceptance-based treatment for depression: A randomized controlled trial. *Journal of affective disorders* 2013;148(2-3):331-7.
11. Andersson G. Using the Internet to provide cognitive behaviour therapy. *Behav Res Ther* 2009;47(3):175-80.
12. Watts S, Mackenzie A, Thomas C, Griskaitis A, Mewton L, Williams A, et al. CBT for depression: a pilot RCT comparing mobile phone vs. computer. *BMC psychiatry* 2013;13:49.
13. Boschen M, Casey L. The use of mobile telephones as adjuncts to cognitive behavioral psychotherapy. *Prof Psychol-Res Pr* 2008;39:546 - 52.
14. Segal ZV, Williams JMG. *Mindfulness-based cognitive therapy for depression*: Guilford Press, 2012.
15. Linehan M. *Cognitive-behavioral treatment of borderline personality disorder*: The Guilford Press, 1993.
16. Hayes SC, Strosahl KD, Wilson KG. *Acceptance and commitment therapy: An experiential approach to behavior change*: Guilford Press New York, 2003.
17. Cash M, Whittingham K. What facets of mindfulness contribute to psychological well-being and depressive, anxious, and stress-related symptomatology? *Mindfulness* 2010;1(3):177-82.
18. Brown KW, Ryan RM. The benefits of being present: mindfulness and its role in psychological well-being. *J Pers Soc Psychol* 2003;84(4):822-48.
19. Hofmann SG, Sawyer AT, Witt AA, Oh D. The effect of mindfulness-based therapy on anxiety and depression: A meta-analytic review. *J Consult Clin Psychol* 2010;78(2):169-83.
20. Piet J, Hougaard E. The effect of mindfulness-based cognitive therapy for prevention of relapse in recurrent major depressive disorder: a systematic review and meta-analysis. *Clinical psychology review* 2011;31(6):1032-40.



- 1
  - 2
  - 3
  - 4
  - 5
  - 6
  - 7
  - 8
  - 9
  - 10
  - 11
  - 12
  - 13
  - 14
  - 15
  - 16
  - 17
  - 18
  - 19
  - 20
  - 21
  - 22
  - 23
  - 24
  - 25
  - 26
  - 27
  - 28
  - 29
  - 30
  - 31
  - 32
  - 33
  - 34
  - 35
  - 36
  - 37
  - 38
  - 39
  - 40
  - 41
  - 42
  - 43
  - 44
  - 45
  - 46
  - 47
  - 48
  - 49
  - 50
  - 51
  - 52
  - 53
  - 54
  - 55
  - 56
  - 57
  - 58
  - 59
  - 60
21. Ljotsson B, Hedman E, Lindfors P, Hursti T, Lindefors N, Andersson G, et al. Long-term follow-up of internet-delivered exposure and mindfulness based treatment for irritable bowel syndrome. *Behav Res Ther* 2011;49(1):58-61.
22. Cuijpers P, Andersson G, Donker T, van Straten A. Psychological treatment of depression: results of a series of meta-analyses. *Nord J Psychiatry* 2011;65(6):354-64.
23. Fournier JC, DeRubeis RJ, Hollon SD, Dimidjian S, Amsterdam JD, Shelton RC, et al. Antidepressant drug effects and depression severity: a patient-level meta-analysis. *JAMA* 2010;303(1):47-53.
24. Andersson G, Bergstrom J, Hollandare F, Carlbring P, Kaldø V, Ekselius L. Internet-based self-help for depression: randomised controlled trial. *The British journal of psychiatry : the journal of mental science* 2005;187:456-61.
25. Beck AT, Steer RA, Brown BK. *Beck Depression Inventory manual*, 1996.
26. Titov N, Dear BF, McMillan D, Anderson T, Zou J, Sunderland M. Psychometric Comparison of the PHQ-9 and BDI-II for Measuring Response during Treatment of Depression. *Cognitive Behaviour Therapy* 2011;40(2):126-36.
27. Kroenke K, Spitzer R, Williams J. The PHQ-9: validity of a brief depression severity measure. *J Gen Intern Med* 2001;16:606 - 13.
28. Beck A, Epstein N, Brown G, Steer R. An inventory for measuring clinical anxiety: psychometric properties. *J Consult Clin Psych* 1988;56:893 - 97.
29. Lindner PA, G.; Öst, L.-G.; Carlbring, P. Validation of the Internet-administered Quality of Life Inventory (QOLI) in different psychiatric conditions. *Cognitive Behaviour Therapy* in press.
30. Frisch M, Cornell J, Villanueva M. Clinical validation of the Quality of life inventory: a measure of life satisfaction for use in treatment planning and outcome assessment. *Psychol Assessment* 1992;4:92 - 101.
31. Hakkaart-van Roijen L, van Straten A, Donker M. Erasmus University, Rotterdam, 2002.
32. Hayes S, Strosahl K, Bunting K, Twohig M, Wilson K. What is Acceptance and Commitment Therapy? *A Practical Guide to Acceptance and Commitment Therapy* 2004:1 - 30.
33. Sheehan DV, Lecrubier Y, Sheehan KH, Amorim P, Janavs J, Weiller E, et al. The Mini-International Neuropsychiatric Interview (M.I.N.I.): the development and validation of a structured diagnostic psychiatric interview for DSM-IV and ICD-10. *J Clin Psychiatry* 1998;59 Suppl 20:22-33;quiz 34-57.
34. Borkovec TD, Nau SD. Credibility of analogue therapy rationales. *Journal of Behavior Therapy and Experimental Psychiatry* 1972;3(4):257-60.
35. Carlbring P, Brunt S, Bohman S, Austin D, Richards J, Vñst LG, et al. *Computers in Human Behaviour* 2007;23(null):1421.
36. Hollandare F, Andersson G, Engstrom I. A comparison of psychometric properties between internet and paper versions of two depression instruments (BDI-II and MADRS-S) administered to clinic patients. *J Med Internet Res* 2010;12(5):e49.
37. Martell CR, Addis ME, Jacobson NS. *Depression in context: Strategies for guided action*: WW Norton & Co, 2001.
38. Lejuez CW, Hopko DR, Hopko SD. A brief behavioral activation treatment for depression treatment manual. *Behavior Modification* 2001;25(2):255-86.
39. Ly K, Dahl J, Carlbring P, Andersson G. Development and initial evaluation of a smartphone application based on acceptance and commitment therapy. *SpringerPlus* 2012;1(1):11.
40. Williams JMG, Teasdale JD, Segal ZV. *The mindful way through depression: Freeing yourself from chronic unhappiness*: The Guilford Press, 2007.

- 1  
2  
3 41. Gueorguieva R, Krystal JH. Move over ANOVA: progress in analyzing repeated-measures data and its  
4 reflection in papers published in the Archives of General Psychiatry. *Arch Gen Psychiatry*  
5 2004;61(3):310-7.  
6  
7 42. Borenstein M, Hedges LV, Higgins JP, Rothstein HR. *Introduction to meta-analysis*: Wiley, 2011.  
8 43. Beck AT. *Cognitive therapy of depression*: The Guilford Press, 1979.  
9 44. Manicavasgar V, Parker G, Perich T. Mindfulness-based cognitive therapy vs cognitive behaviour  
10 therapy as a treatment for non-melancholic depression. *J Affect Disord* 2011;130(1-2):138-44.  
11 45. Kenny MA, Williams JM. Treatment-resistant depressed patients show a good response to  
12 Mindfulness-based Cognitive Therapy. *Behav Res Ther* 2007;45(3):617-25.  
13 46. *Psykologisk behandling vid depression : teorier, terapimetoder och forskning A1 - Andersson, Gerhard*  
14 *Y1 - 2012*.  
15 47. Andersson G. *Psykologisk behandling vid depression: teorier, terapimetoder och forskning*. 2012.  
16 48. Bishop SR. What do we really know about mindfulness-based stress reduction? *Psychosom Med*  
17 2002;64(1):71-83.  
18 49. Vessey JT, Howard KI. Who seeks psychotherapy? *Psychotherapy: Theory, Research, Practice,*  
19 *Training* 1993;30(4):546.  
20 50. Howard KI, Cornille TA, Lyons JS, Vessey JT. Patterns of mental health service utilization. *Archives of*  
21 *General Psychiatry* 1996.  
22  
23  
24  
25  
26  
27  
28  
29  
30  
31  
32  
33  
34  
35  
36  
37  
38  
39  
40  
41  
42  
43  
44  
45  
46  
47  
48  
49  
50  
51  
52  
53  
54  
55  
56  
57  
58  
59  
60

**Table 1.** Demographic description of the participants at randomization.

|                                           |                             | <b>Behavioral activation<br/>(N = 40)</b> | <b>Mindfulness<br/>(N = 41)</b> | <b>Total<br/>(N = 81)</b> |
|-------------------------------------------|-----------------------------|-------------------------------------------|---------------------------------|---------------------------|
| <b>Age</b>                                | Mean (SD)                   | 36.6 (10.5)                               | 35.6 (11.3)                     | 36.1 (10.8)               |
|                                           | Min-Max                     | 20-59                                     | 21-61                           | 20-61                     |
| <b>Gender</b>                             | Female                      | 28 (70 %)                                 | 29 (70.7 %)                     | 57 (70 %)                 |
|                                           | Male                        | 12 (30 %)                                 | 12 (29.3 %)                     | 24 (30 %)                 |
| <b>Marital status</b>                     | Single                      | 15 (37.5 %)                               | 15 (36.6 %)                     | 30 (37 %)                 |
|                                           | Married                     | 19 (47.5 %)                               | 24 (58.6 %)                     | 43 (53.2 %)               |
|                                           | Divorced/widow/widower      | 5 (12.5 %)                                | 1 (2.4 %)                       | 6 (7.4 %)                 |
|                                           | Other                       | 1 (2.5 %)                                 | 1 (2.4 %)                       | 2 (2.4 %)                 |
| <b>Highest educational level</b>          | Nine year compulsory school | 1 (2.5 %)                                 | 2 (4.9 %)                       | 3 (3.8 %)                 |
|                                           | Secondary school            | 11 (27.5 %)                               | 14 (34.1 %)                     | 25 (30.9 %)               |
|                                           | College/university          | 27 (67.5 %)                               | 24 (58.5 %)                     | 51 (63 %)                 |
|                                           | Other                       | 1 (2.5 %)                                 | 1 (2.4 %)                       | 2 (2.5 %)                 |
| <b>Employment status</b>                  | Employed/student            | 35 (87.5 %)                               | 30 (73.2 %)                     | 65 (80.2 %)               |
|                                           | Unemployed                  | 3 (7.5 %)                                 | 3 (7.3 %)                       | 6 (7.4 %)                 |
|                                           | Retired                     | 0 (0 %)                                   | 1 (2.4 %)                       | 1 (1.2 %)                 |
|                                           | Other                       | 2 (6.3 %)                                 | 7 (17.1 %)                      | 9 (11.1 %)                |
| <b>Type of Smartphone Medication</b>      | Iphone                      | 24 (60 %)                                 | 23 (56.1 %)                     | 47 (58 %)                 |
|                                           | Android                     | 16 (40 %)                                 | 18 (43.9 %)                     | 34 (42 %)                 |
|                                           | Yes, earlier                | 10 (25 %)                                 | 13 (31.7 %)                     | 23 (28.4 %)               |
|                                           | Yes, present                | 12 (30 %)                                 | 14 (34.1 %)                     | 26 (32.1 %)               |
|                                           | None                        | 18 (45 %)                                 | 14 (34.1 %)                     | 32 (39.5 %)               |
| <b>Psychological treatment</b>            | Yes, earlier                | 19 (47.5 %)                               | 23 (56.1 %)                     | 42 (51.9 %)               |
|                                           | None                        | 21 (52.5 %)                               | 18 (43.9 %)                     | 39 (48.1 %)               |
| <b>Experience of self-help literature</b> | Yes                         | 12 (30 %)                                 | 13 (31.7 %)                     | 25 (30.9 %)               |
|                                           | None                        | 28 (70 %)                                 | 28 (68.3 %)                     | 56 (69.1 %)               |
| <b>Diagnosis</b>                          | Depression                  | 34 (85 %)                                 | 32 (78 %)                       | 66 (82.5 %)               |
|                                           | With dysthymia              | 22 (55 %)                                 | 18 (44 %)                       | 40 (49 %)                 |
|                                           | Earlier episodes            | 31 (77.5 %)                               | 34 (83 %)                       | 65 (80 %)                 |
|                                           | Panic disorder              | 1 (2.5 %)                                 | 3 (7.5 %)                       | 4 (5 %)                   |
|                                           | Social phobia               | 6 (15 %)                                  | 7 (17 %)                        | 13 (16 %)                 |
|                                           | GAD                         | 19 (47.5 %)                               | 10 (24.5 %)                     | 29 (36 %)                 |

**Table 2.** List of behaviors in the database.

**Everyday structure**

Get out of bed when the bell rings in the morning  
 Take a shower  
 Get ready in the morning  
 Eat breakfast  
 Read the newspaper  
 Make a meal plan for each day of the week  
 Make a shopping list for meals  
 Buy food for the meals you have planned  
 Prepare a simple meal  
 Clean a part of my home  
 Clean at least 15 minutes  
 Washing dishes immediately after a meal  
 Wash my clothes  
 Plan my TV viewing from TV schedules  
 Turn off the TV before 21:00 if I'm still watching TV  
 Turn off the computer before 21:00 if I'm still on the Internet  
 Take a brisk walk for 10 minutes  
 Log in to my online banking and pay a bill  
 Entering my weekly activities in my calendar

**Social behaviors**

Texting a friend and ask what he / she does  
 Call a friend and ask what the situation is  
 Take a walk with a friend  
 Book a meeting with someone in my family  
 Suggest a coffee with a friend or family member  
 Suggest a lunch with a friend or family member  
 Go to the playground with my kids  
 Bake something with my children  
 Meet a friend in the evening and ask how your day was  
 Watching an episode of a TV series with a friend  
 Go to the movies with a friend  
 Cooking with someone

**New activities**

Buy or borrow a book I wanted to read  
 Read at least 20 minutes out of a book  
 Go to a new cafe and coffee  
 Look up the nearest training center is  
 Read on about training online  
 Post a workout plan for the week  
 Ask a friend if he / she wants to come along and train  
 Spend at least 30 minutes of physical activity  
 Listen to a radio program  
 Watch a documentary on TV  
 Eat a good meal out  
 Write down at least two good things that happened around me  
 Rent a movie and have a night in  
 Look up the exhibits that are in my city  
 See an exhibition at a museum  
 Look up the concerts that are relevant right now  
 Go to a concert  
 Look up current things happening in my city  
 Attend a church service  
 Solve a crossword  
 Make a Sudoku  
 Listen to music without doing anything else and focus on what I hear  
 Go to town and buy something nice for myself

**Table 3.** Means, SDs and effect sizes (Cohen's d) for measures of depression, anxiety, psychological flexibility and quality of life.

| Outcome measure       | Mean (SD)     |                           |                           | Effect size, <i>d</i> (95% CI) |                        |                                   |                                   |
|-----------------------|---------------|---------------------------|---------------------------|--------------------------------|------------------------|-----------------------------------|-----------------------------------|
|                       | Pre-treatment | Post-treatment            | 6-month follow-up         | Between-group, pre-post        | Between-group, pre-6FU | Within-group, pre-post            | Within-group, pre-6FU             |
| Total                 |               |                           |                           |                                |                        |                                   |                                   |
| BDI-II                |               |                           |                           |                                |                        |                                   |                                   |
| Behavioral activation | 23.50 (7.85)  | 10.89 (5.92)              | 12.71 (10.56)             | 0.25 (-1.65-                   | 0.03 (-2.63-           | 1.83 (0.27-3.38)                  | 1.19 (-0.87-3.24)                 |
| Mindfulness           | 24.68 (9.47)  | 12.94 (10.18)             | 13.09 (12.24)             | 2.15 (0.85-                    | 2.69 (1.69-            | 1.21 (-0.95-3.38)                 | 1.09 (-1.32-3.50)                 |
| PHQ-9                 |               |                           |                           |                                |                        |                                   |                                   |
| Behavioral activation | 12.53 (4.43)  | 5.83 (3.85) (7.19 (5.84)) | 6.77 (5.83) (7.74 (7.33)) | 0.28 (-1.97-                   | 0.15 (-1.39-           | 1.63 (0.71-2.56)                  | 1.14 (-0.01-2.28)                 |
| Mindfulness           | 13.22 (4.81)  | 7.19 (5.84)               | 7.74 (7.33)               | 1.40 (0.45-                    | 1.69 (0.51-            | 1.15 (-0.02-2.32)                 | 0.91 (-0.44-2.27)                 |
| BAI                   |               |                           |                           |                                |                        |                                   |                                   |
| Behavioral activation | 14.60 (9.09)  | 8.81 (5.77) (9.22 (7.68)) | 8.34 (8.50) (8.38 (7.48)) | 0.06 (-1.49-                   | 0.01 (-1.86-           | 0.76 (-0.95-2.47)                 | 0.72 (-1.25-2.69)                 |
| Mindfulness           | 13.51 (9.31)  | 9.22 (7.68)               | 8.38 (7.48)               | 1.61 (0.45-                    | 1.87 (0.51-            | 0.51 (-1.39-2.40)                 | 0.61 (-1.30-2.51)                 |
| AAQ-II                |               |                           |                           |                                |                        |                                   |                                   |
| Behavioral activation | 27.28 (7.05)  | 21.22 (8.24)              | 20.09 (9.28)              | 0.22 (-1.97-                   | 0.10 (-2.10-           | 0.80 (-0.89-2.50)                 | 0.89 (-0.93-2.72)                 |
| Mindfulness           | 28.22 (7.09)  | 23.32 (10.82)             | 21.03 (9.68)              | 2.41 (0.45-                    | 2.31 (0.51-            | 0.56 (-1.44-2.54)                 | 0.87 (-1.00-2.74)                 |
| QoLI                  |               |                           |                           |                                |                        |                                   |                                   |
| Behavioral activation | -0.45 (1.38)  | 0.92 (1.66) (0.84 (1.90)) | 1.15 (2.40) (1.13 (2.07)) | 0.05 (-0.36-                   | 0.01 (-0.53-           | 0.91 (0.58-1.25) 0.62 (0.24-0.99) | 0.84 (0.41-1.27) 0.75 (0.36-1.15) |
| Mindfulness           | -0.20 (1.51)  | 0.84 (1.90)               | 1.13 (2.07)               | 0.45 (0.45-                    | 0.51 (0.51-            |                                   |                                   |
| High level depression |               |                           |                           |                                |                        |                                   |                                   |
| BDI-II                |               |                           |                           |                                |                        |                                   |                                   |
| Behavioral activation | 26.87 (7.14)  | 12.00 (6.31)              | 11.81 (10.63)             | 0.42 (-2.09-                   | 0.39 (-2.95-           | 2.25 (0.33-4.18)                  | 1.72 (-0.87-4.31)                 |
| Mindfulness           | 28.00 (8.61)  | 15.68 (10.76)             | 16.28 (12.71)             | 2.93 (0.45-                    | 3.73 (0.51-            | 1.62 (-0.44-3.67)                 | 1.32 (-1.07-3.71)                 |
| PHQ-9                 |               |                           |                           |                                |                        |                                   |                                   |
| Behavioral activation | 15.52 (3.29)  | 6.64 (4.42) (8.60 (6.29)) | 6.48 (5.59) (9.60 (7.71)) | 0.36 (-1.17-                   | 0.47 (-1.46-           | 2.34 (1.23-3.45)                  | 2.04 (0.73-3.35)                  |
| Mindfulness           | 15.57 (3.35)  | 8.60 (6.29)               | 9.60 (7.71)               | 1.90 (0.45-                    | 2.40 (0.51-            | 1.43 (0.13-2.74)                  | 1.05 (-0.49-2.58)                 |
| BAI                   |               |                           |                           |                                |                        |                                   |                                   |
| Behavioral activation | 17.43 (9.37)  | 9.18 (6.68) (10.68)       | 9.62 (8.91) (9.72 (7.91)) | 0.20 (-1.94-                   | 0.01 (-2.36-           | 1.03 (-1.30-3.37)                 | 0.87 (-1.77-3.52)                 |
| Mindfulness           | 15.57 (9.39)  | 8.39 (8.39)               | 9.72 (7.91)               | 2.34 (0.45-                    | 2.38 (0.51-            | 0.56 (-1.80-2.92)                 | 0.68 (-1.62-2.99)                 |
| AAQ-II                |               |                           |                           |                                |                        |                                   |                                   |
| Behavioral activation | 28.27 (7.21)  | 21.68 (8.90)              | 19.33 (9.27)              | 0.44 (-2.30-                   | 0.47 (-2.16-           | 0.83 (-1.47-3.14)                 | 1.11 (-1.28-3.49)                 |
| Mindfulness           | 29.04 (6.50)  | 25.87 (10.52)             | 23.56 (9.33)              | 3.18 (0.45-                    | 3.09 (0.51-            | 0.38 (-1.90-2.65)                 | 0.70 (-1.40-2.80)                 |
| QoLI                  |               |                           |                           |                                |                        |                                   |                                   |
| Behavioral activation | -0.51 (1.30)  | 0.78 (1.58) (0.38 (1.58)) | 1.25 (2.07) (0.53 (2.23)) | 0.26 (-0.70-                   | 0.34 (-0.95-           | 0.91 (0.50-1.33)                  | 1.05 (0.56-1.55)                  |
| Mindfulness           | -0.71 (1.18)  | 0.38 (1.58)               | 0.53 (2.23)               | 0.18 (0.45-                    | 0.27 (0.51-            | 0.80 (0.44-1.17)                  | 0.72 (0.26-1.18)                  |
| Low level depression  |               |                           |                           |                                |                        |                                   |                                   |
| BDI-II                |               |                           |                           |                                |                        |                                   |                                   |
| Behavioral activation | 18.94 (6.47)  | 9.14 (4.96) (6.73 (4.86)) | 14.07 (10.71)             | -0.51 (-2.36-                  | -1.18 (-4.59-          | 1.74 (-0.25-3.72)                 | 0.58 (-2.36-3.52)                 |
| Mindfulness           | 17.54 (7.09)  | 4.86 (4.86)               | 4.22 (3.63)               | 1.34 (0.45-                    | 2.23 (0.51-            | 1.83 (-0.54-4.19)                 | 2.35 (-0.03-4.72)                 |
| PHQ-9                 |               |                           |                           |                                |                        |                                   |                                   |
| Behavioral activation | 8.47 (1.59)   | 4.57 (2.34) (4.00 (2.86)) | 7.21 (6.36) (2.56 (1.51)) | -0.23 (-1.20-                  | -0.97 (-2.94-          | 2.06 (1.39-2.72)                  | 0.30 (-1.21-1.80)                 |
| Mindfulness           | 8.15 (3.34)   | 4.00 (2.86)               | 2.56 (1.51)               | 0.74 (0.45-                    | 1.03 (0.51-            | 1.38 (0.19-2.59)                  | 2.13 (1.03-3.23)                  |
| BAI                   |               |                           |                           |                                |                        |                                   |                                   |
| Behavioral activation | 10.76 (7.33)  | 8.21 (4.10) (5.91 (4.48)) | 6.43 (7.80) (4.67 (4.64)) | -0.56 (-2.17-                  | -0.27 (-2.92-          | 0.43 (-1.64-2.51)                 | 0.59 (-1.98-3.16)                 |
| Mindfulness           | 9.08 (7.70)   | 4.48 (4.48)               | 4.67 (4.64)               | 1.04 (0.45-                    | 2.38 (0.51-            | 0.51 (-1.95-2.98)                 | 0.67 (-1.95-3.34)                 |
| AAQ-II                |               |                           |                           |                                |                        |                                   |                                   |

|    |             |             |             |             |          |          |              |
|----|-------------|-------------|-------------|-------------|----------|----------|--------------|
| 1  |             |             |             |             |          |          |              |
| 2  |             |             |             |             |          |          |              |
| 3  | Behavioral  | 26.00       | 20.50       | 21.21       | -0.37 (- | -0.87 (- | 0.80 (-1.61- |
| 4  | activation  | (6.85)      | (7.34)      | (9.54)      | 3.52-    | 4.26-    | 3.21)        |
| 5  | Mindfulness | 26.46       | 17.52       | 14.00       | 2.78)    | 2.52)    | 1.06 (-2.33- |
| 6  |             | (8.21)      | (9.54)      | (7.07)      |          |          | 4.44)        |
| 7  | QoLI        |             |             |             |          |          |              |
| 8  | Behavioral  | -0.37       | 1.14 (1.83) | 0.97 (2.15) | -0.38 (- | -0.93 (- | 0.94 (0.37-  |
| 9  | activation  | (1.52)      | 1.87 (2.24) | 2.87 (2.10) | 0.38-    | 1.77--   | 1.50)        |
| 10 | Mindfulness | 0.89 (1.61) |             |             | 1.14)    | 0.10)    | 0.53 (-0.20- |
| 11 |             |             |             |             |          |          | 1.14 (0.41-  |
| 12 |             |             |             |             |          |          | 1.87)        |

Abbreviations: BDI-II: Beck Depression Inventory-II; PHQ-9: 9-item Patient Health Questionnaire Depression Scale; BAI: Beck Anxiety Inventory; AAQ-II: Acceptance and Action Questionnaire; QOLI: Quality of Life Inventory.

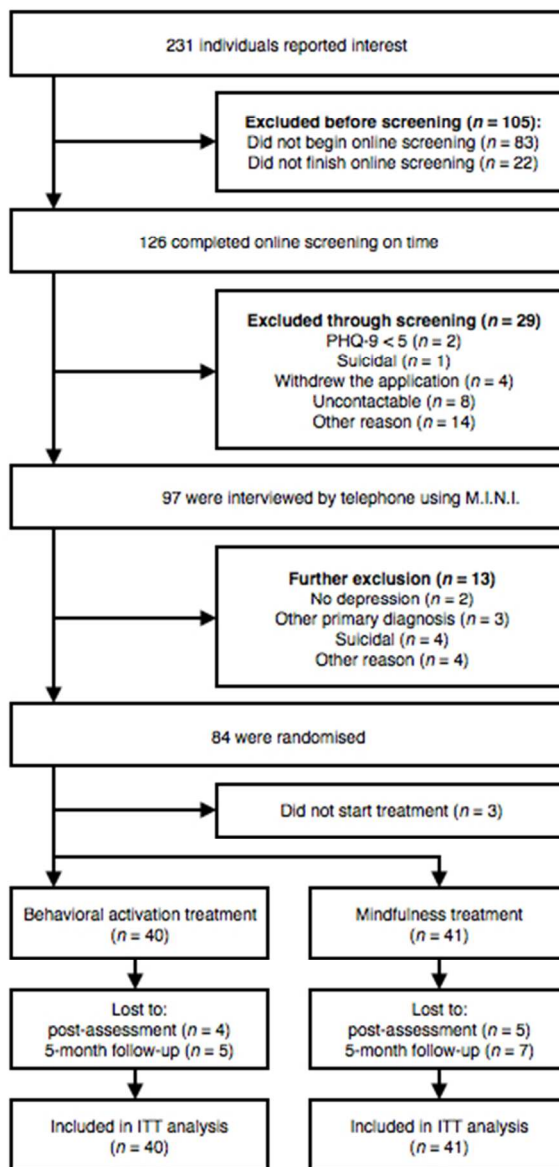

176x249mm (72 x 72 DPI)

1  
2  
3  
4  
5  
6  
7  
8  
9  
10  
11  
12  
13  
14  
15  
16  
17  
18  
19  
20  
21  
22  
23  
24  
25  
26  
27  
28  
29  
30  
31  
32  
33  
34  
35  
36  
37  
38  
39  
40  
41  
42  
43  
44  
45  
46  
47  
48  
49  
50  
51  
52  
53  
54  
55  
56  
57  
58  
59  
60

.....

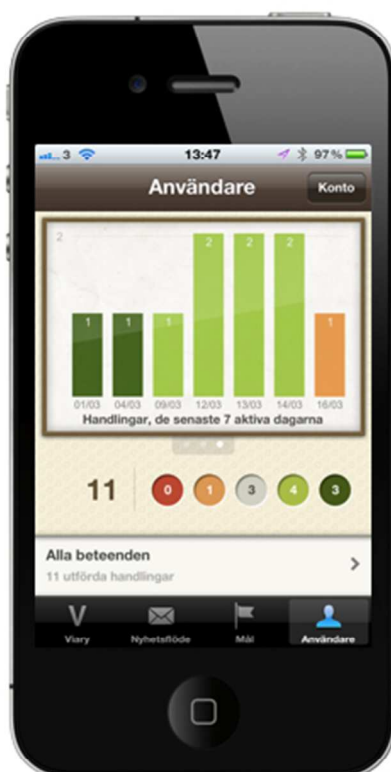

.....

176x249mm (72 x 72 DPI)



1  
2  
3  
4  
5  
6  
7  
8  
9  
10  
11  
12  
13  
14  
15  
16  
17  
18  
19  
20  
21  
22  
23  
24  
25  
26  
27  
28  
29  
30  
31  
32  
33  
34  
35  
36  
37  
38  
39  
40  
41  
42  
43  
44  
45  
46  
47  
48  
49  
50  
51  
52  
53  
54  
55  
56  
57  
58  
59  
60

.....

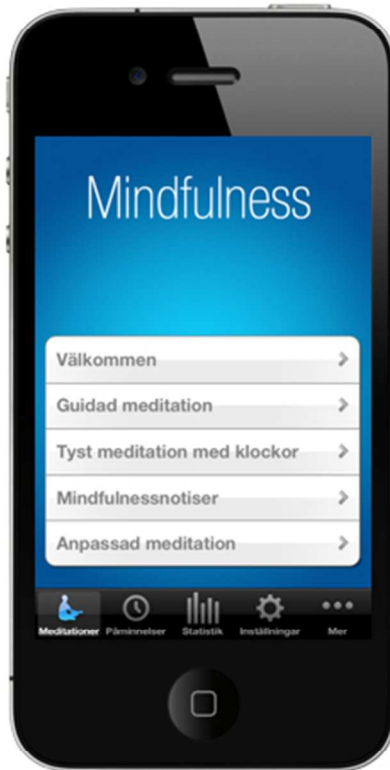

.....

176x249mm (72 x 72 DPI)

## CONSORT 2010 Flow Diagram

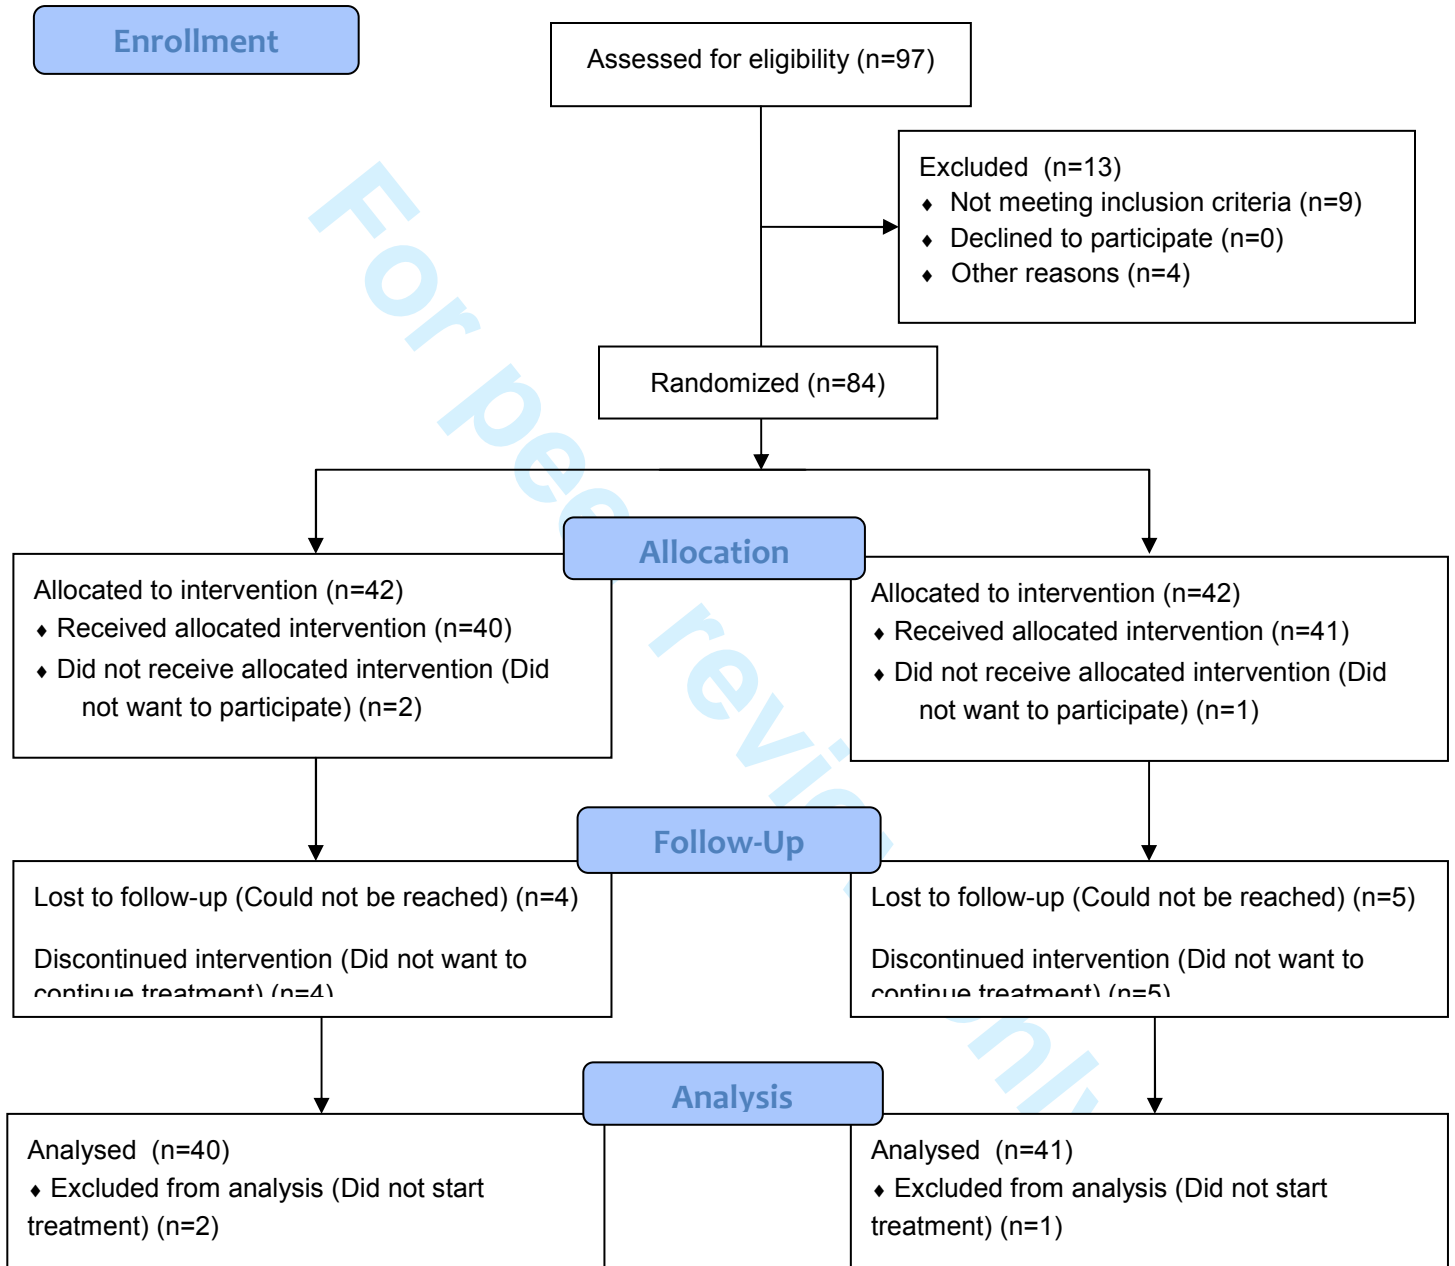

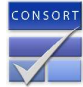

## CONSORT 2010 checklist of information to include when reporting a randomised trial\*

| Section/Topic                    | Item No | Checklist item                                                                                                                                                                              | Reported on page No |
|----------------------------------|---------|---------------------------------------------------------------------------------------------------------------------------------------------------------------------------------------------|---------------------|
| <b>Title and abstract</b>        |         |                                                                                                                                                                                             |                     |
|                                  | 1a      | Identification as a randomised trial in the title                                                                                                                                           | 1                   |
|                                  | 1b      | Structured summary of trial design, methods, results, and conclusions (for specific guidance see CONSORT for abstracts)                                                                     | 2-3                 |
| <b>Introduction</b>              |         |                                                                                                                                                                                             |                     |
| Background and objectives        | 2a      | Scientific background and explanation of rationale                                                                                                                                          | 3-5                 |
|                                  | 2b      | Specific objectives or hypotheses                                                                                                                                                           | 5                   |
| <b>Methods</b>                   |         |                                                                                                                                                                                             |                     |
| Trial design                     | 3a      | Description of trial design (such as parallel, factorial) including allocation ratio                                                                                                        | 7                   |
|                                  | 3b      | Important changes to methods after trial commencement (such as eligibility criteria), with reasons                                                                                          | N/A                 |
| Participants                     | 4a      | Eligibility criteria for participants                                                                                                                                                       | 5                   |
|                                  | 4b      | Settings and locations where the data were collected                                                                                                                                        | 7                   |
| Interventions                    | 5       | The interventions for each group with sufficient details to allow replication, including how and when they were actually administered                                                       | 7-8                 |
| Outcomes                         | 6a      | Completely defined pre-specified primary and secondary outcome measures, including how and when they were assessed                                                                          | 6                   |
|                                  | 6b      | Any changes to trial outcomes after the trial commenced, with reasons                                                                                                                       | N/A                 |
| Sample size                      | 7a      | How sample size was determined                                                                                                                                                              | 9                   |
|                                  | 7b      | When applicable, explanation of any interim analyses and stopping guidelines                                                                                                                | N/A                 |
| Randomisation:                   |         |                                                                                                                                                                                             |                     |
| Sequence generation              | 8a      | Method used to generate the random allocation sequence                                                                                                                                      | 7                   |
|                                  | 8b      | Type of randomisation; details of any restriction (such as blocking and block size)                                                                                                         | 7                   |
| Allocation concealment mechanism | 9       | Mechanism used to implement the random allocation sequence (such as sequentially numbered containers), describing any steps taken to conceal the sequence until interventions were assigned | 7                   |
| Implementation                   | 10      | Who generated the random allocation sequence, who enrolled participants, and who assigned participants to interventions                                                                     | 7                   |
| Blinding                         | 11a     | If done, who was blinded after assignment to interventions (for example, participants, care providers, those assessing outcomes) and how                                                    | 6                   |

|    |                          |     |                                                                                                                  |
|----|--------------------------|-----|------------------------------------------------------------------------------------------------------------------|
| 1  |                          |     |                                                                                                                  |
| 2  |                          |     |                                                                                                                  |
| 3  |                          | 11b | If relevant, description of the similarity of interventions                                                      |
| 4  | Statistical methods      | 12a | Statistical methods used to compare groups for primary and secondary outcomes                                    |
| 5  |                          | 12b | Methods for additional analyses, such as subgroup analyses and adjusted analyses                                 |
| 6  |                          |     |                                                                                                                  |
| 7  | <b>Results</b>           |     |                                                                                                                  |
| 8  | Participant flow (a      | 13a | For each group, the numbers of participants who were randomly assigned, received intended treatment, and         |
| 9  | diagram is strongly      |     | were analysed for the primary outcome                                                                            |
| 10 | recommended)             | 13b | For each group, losses and exclusions after randomisation, together with reasons                                 |
| 11 | Recruitment              | 14a | Dates defining the periods of recruitment and follow-up                                                          |
| 12 |                          | 14b | Why the trial ended or was stopped                                                                               |
| 13 |                          |     |                                                                                                                  |
| 14 | Baseline data            | 15  | A table showing baseline demographic and clinical characteristics for each group                                 |
| 15 | Numbers analysed         | 16  | For each group, number of participants (denominator) included in each analysis and whether the analysis was      |
| 16 |                          |     | by original assigned groups                                                                                      |
| 17 |                          |     |                                                                                                                  |
| 18 | Outcomes and             | 17a | For each primary and secondary outcome, results for each group, and the estimated effect size and its            |
| 19 | estimation               |     | precision (such as 95% confidence interval)                                                                      |
| 20 |                          | 17b | For binary outcomes, presentation of both absolute and relative effect sizes is recommended                      |
| 21 | Ancillary analyses       | 18  | Results of any other analyses performed, including subgroup analyses and adjusted analyses, distinguishing       |
| 22 |                          |     | pre-specified from exploratory                                                                                   |
| 23 |                          |     |                                                                                                                  |
| 24 | Harms                    | 19  | All important harms or unintended effects in each group (for specific guidance see CONSORT for harms)            |
| 25 |                          |     |                                                                                                                  |
| 26 | <b>Discussion</b>        |     |                                                                                                                  |
| 27 | Limitations              | 20  | Trial limitations, addressing sources of potential bias, imprecision, and, if relevant, multiplicity of analyses |
| 28 | Generalisability         | 21  | Generalisability (external validity, applicability) of the trial findings                                        |
| 29 | Interpretation           | 22  | Interpretation consistent with results, balancing benefits and harms, and considering other relevant evidence    |
| 30 |                          |     |                                                                                                                  |
| 31 | <b>Other information</b> |     |                                                                                                                  |
| 32 | Registration             | 23  | Registration number and name of trial registry                                                                   |
| 33 | Protocol                 | 24  | Where the full trial protocol can be accessed, if available                                                      |
| 34 | Funding                  | 25  | Sources of funding and other support (such as supply of drugs), role of funders                                  |
| 35 |                          |     |                                                                                                                  |

36

37 \*We strongly recommend reading this statement in conjunction with the CONSORT 2010 Explanation and Elaboration for important clarifications on all the items. If relevant, we also

38 recommend reading CONSORT extensions for cluster randomised trials, non-inferiority and equivalence trials, non-pharmacological treatments, herbal interventions, and pragmatic trials.

39 Additional extensions are forthcoming: for those and for up to date references relevant to this checklist, see [www.consort-statement.org](http://www.consort-statement.org).

40

41

42

43



**Behavioral activation vs. Mindfulness-based guided self-help treatment administered through a smartphone application: a randomized controlled trial**

|                                 |                                                                                                                                                                                                                                                                                                                                                                                                                                                                                                                                                                                                                                                                                                                                          |
|---------------------------------|------------------------------------------------------------------------------------------------------------------------------------------------------------------------------------------------------------------------------------------------------------------------------------------------------------------------------------------------------------------------------------------------------------------------------------------------------------------------------------------------------------------------------------------------------------------------------------------------------------------------------------------------------------------------------------------------------------------------------------------|
| Journal:                        | <i>BMJ Open</i>                                                                                                                                                                                                                                                                                                                                                                                                                                                                                                                                                                                                                                                                                                                          |
| Manuscript ID:                  | bmjopen-2013-003440.R1                                                                                                                                                                                                                                                                                                                                                                                                                                                                                                                                                                                                                                                                                                                   |
| Article Type:                   | Research                                                                                                                                                                                                                                                                                                                                                                                                                                                                                                                                                                                                                                                                                                                                 |
| Date Submitted by the Author:   | 19-Aug-2013                                                                                                                                                                                                                                                                                                                                                                                                                                                                                                                                                                                                                                                                                                                              |
| Complete List of Authors:       | Ly, Kien Hoa; Linköping University, Department of Behavioural Sciences and Learning<br>Trüschel, Anna; Linköping University, Department of Behavioural Sciences and Learning<br>Jarl, Linnea; Linköping University, Department of Behavioural Sciences and Learning<br>Magnusson, Susanna; Linköping University, Department of Behavioural Sciences and Learning<br>Windahl, Tove; Linköping University, Department of Behavioural Sciences and Learning<br>Johansson, Robert; Linköping University, Department of Behavioural Sciences and Learning<br>Carlbring, Per; Stockholm University, Department of Psychology<br>Andersson, Gerhard; Karolinska Institutet, Department of Clinical Neuroscience, Center for Psychiatry Research |
| <b>Primary Subject Heading</b>: | Mental health                                                                                                                                                                                                                                                                                                                                                                                                                                                                                                                                                                                                                                                                                                                            |
| Secondary Subject Heading:      | Public health                                                                                                                                                                                                                                                                                                                                                                                                                                                                                                                                                                                                                                                                                                                            |
| Keywords:                       | Depression, Smartphone application, Behavioral activation, Mindfulness                                                                                                                                                                                                                                                                                                                                                                                                                                                                                                                                                                                                                                                                   |
|                                 |                                                                                                                                                                                                                                                                                                                                                                                                                                                                                                                                                                                                                                                                                                                                          |

SCHOLARONE™  
Manuscripts

# Behavioral activation vs. Mindfulness-based guided self-help treatment administered through a smartphone application: a randomized controlled trial

Kien Hoa Ly<sup>§</sup>, Anna Trüschel<sup>1</sup>, Linnea Jarl<sup>1</sup>, Susanna Magnusson<sup>1</sup>, Tove Windahl<sup>1</sup>, Robert Johansson<sup>1</sup>, Per Carlbring<sup>2</sup>, Gerhard Andersson<sup>1,3</sup>

<sup>1</sup> Department of Behavioural Sciences and Learning, Linköping University, Linköping, Sweden

<sup>2</sup> Department of Psychology, Stockholm University, Stockholm, Sweden

<sup>3</sup> Department of Clinical Neuroscience, Center for Psychiatry Research, Karolinska Institutet, Stockholm, Sweden

<sup>§</sup> Corresponding author

Email addresses:

KHL: kien.hoa.ly@liu.se

AT: annr005@student.liu.se

LJ: linja498@student.liu.se

SM: susma302@student.liu.se

TW: tovwi961@student.liu.se

RJ: robert.johansson@liu.se

PC: per@carlbring.se

GA: gerhard.andersson@liu.se

## Article Summary

### 1) Article Focus

- It is well established that guided self-help interventions, administered through internet, can have positive effects on symptoms of depression. There are, however, to our knowledge no controlled trials on smartphone-delivered behavioral activation, neither on mindfulness.
- Both behavioral activation and mindfulness are components in multi-component treatment packages, and as such they might be easier to target in smartphone applications than an entire treatment program would be, due to the need of simple and fast interaction with the treatment program.

1  
2  
3 • The aim of this study was to test the effects of two smartphone-delivered treatments; one based  
4 on behavioral activation and the other on mindfulness. We expected that behavioral activation  
5 would be superior to mindfulness for participants suffering from more severe depression.  
6  
7

## 8 9 2) Key Messages

10 • The large within-group effect sizes are comparable to other depression treatment and indicate  
11 that this smartphone format might work well for a depressed population.  
12

13 • Behavioral activation might work better for a more severely depressed population, whereas  
14 mindfulness might work better for people suffering from light depression, at least in this  
15 smartphone format.  
16

17 • Since smartphones likely will be integrated even further in society, they may be important in  
18 the future of making depression treatment and other psychological treatment more assimilated  
19 into people's daily life.  
20  
21

## 22 23 3) Strengths and Limitations.

24 • One of the first to do a randomized controlled trial using smartphone applications.  
25

26 • Did not control for the different components separately, so we cannot determine which parts of  
27 the treatments were effective.  
28  
29  
30

## 31 32 **Keywords**

33 Depression, Behavioral activation, Smartphone application, Mindfulness.  
34  
35  
36

## 37 38 **Abstract**

### 39 **Objectives**

40 Evaluating the effectiveness of two smartphone-delivered treatments; one based on behavioral  
41 activation and the other on mindfulness.  
42  
43  
44

### 45 **Design**

46 Parallel randomized controlled, open, trial. Participants were allocated using an online  
47 randomization tool, handled by an independent person who was separate from the staff  
48 conducting the study.  
49  
50  
51

### 52 **Setting**

53 General community, with recruitment nationally through mass media and advertisements.  
54  
55  
56  
57  
58  
59  
60

## Participants

40 participants diagnosed with major depressive disorder received a behavioral activation treatment, and 41 participants received a mindfulness treatment

9 participants were lost at the post-treatment.

## Intervention

Behavioral activation: An 8 week long behavior program administered via a smartphone application. Mindfulness: An 8 week long mindfulness program, administered via a smartphone application. □

## Main outcome measures

The primary outcome measures were the Beck Depression Inventory-II (BDI-II) and the 9-item Patient Health Questionnaire Depression Scale (PHQ-9). □

## Results

81 participants (BA n=40; Mindfulness n=41) were randomized (mean age 36.0 years (SD=10.8)) and analyzed. Results showed large within-group effect sizes on the BDI-II for the behavioral activation treatment and mindfulness treatment respectively from pre-treatment to the 6-month follow up ( $d=1.19$  and  $d=1.09$ ), but no significant interaction effects of group and time on any of the outcome measures from pre-treatment to the 6-month follow up. Subgroup analyses showed that the behavioral activation treatment was more effective than the mindfulness treatment among participants with higher initial severity of depression, measured with the PHQ-9. In contrast, the mindfulness treatment worked better than the behavioral activation treatment among participants with lower initial severity.

## Conclusions

For participants with higher severity of depression, the treatment based on behavioral activation was superior to the treatment based on mindfulness. For participants with lower initial severity, the treatment based on mindfulness worked significantly better than the treatment based on behavioral activation.

## Trial registration

Clinical Trials NCT01463020.

## Funding

The Swedish Research Council, 2011-2476



## Background

Major depressive disorder (MDD) is a major health problem, which lowers the quality of life for the individual and generates enormous costs for society<sup>1,2</sup>. Several forms of psychotherapy have been found to be effective in the treatment of MDD<sup>3</sup>. For example, behavioral activation has an established empirical base<sup>4</sup>. The efficacy of behavioral activation for treating MDD has been established in a number of studies over the past four decades<sup>5</sup>. Moreover, a dismantling study showed that behavioral activation could be as effective as the full cognitive behavior therapy (CBT) treatment package<sup>6</sup>. In addition, a series of reviews and meta-analyses also show that behavioral activation is at least as effective as the full CBT packages that include both cognitive and behavioral components<sup>4</sup>. In a later study, behavioral activation was found to be as effective as antidepressant medication<sup>7</sup>.

It is also well established that guided self-help interventions, administered through internet, can have positive effects on symptoms of depression<sup>8-10</sup>. An increasing number of studies show that this treatment format can be as effective as face-to-face treatment for mild to moderate MDD and anxiety disorders<sup>9</sup>. Guided treatments distributed digitally have provided a way to reach out to more patients in a manner that in most cases requires less therapist time than face-to-face psychotherapy<sup>11</sup>. There are, however, to our knowledge no controlled trial on internet-delivered pure behavioral activation, and no study using smartphones for the delivery of behavioral activation, even if studies are being conducted on smartphone-administered CBT<sup>12</sup>.

An important feature of mobile technology is the possibility for the therapist to reach the patient outside of the therapy room or when not sitting in front of the computer, and thus create direct incentives for behavior change in the patient's everyday life<sup>13</sup>. Therefore, behavioral activation is a treatment that could benefit from the use of new mobile technologies (for example smartphones) by creating direct incentives for behavioral activation in patient's everyday life.

The same applies for mindfulness. Mindfulness is often a component in the so called third wave of CBT, such as mindfulness-based cognitive therapy (MBCT;<sup>14</sup>), dialectical behavior therapy (DBT;<sup>15</sup>), and acceptance and commitment therapy (ACT;<sup>16</sup>). Studies have shown a significant negative correlation between mindfulness and depression<sup>17,18</sup>. Moreover, a meta-analysis based on 39 studies of mindfulness for depression and anxiety showed a moderate effect size of Hedges's  $g=0.59$  for improving mood symptoms<sup>19</sup>. The analysis also showed that mindfulness was effective for individuals with depression as both the primary diagnosis and the secondary. Moreover, mindfulness has been shown to be effective in relapse prevention in depression<sup>20</sup>. Within digitally distributed treatments, mindfulness has appeared as a component in CBT-based internet treatments, but there have so far been few studies on mindfulness as a stand-alone, digitally distributed treatment for depression<sup>21</sup>.

The advantages as well as the challenges of using mobile phones in CBT have been summarized by Boschen and Casey<sup>13</sup>. One challenge with using the mobile phone as a platform for psychological treatment is that the user must be able to interact with the program in an easy way<sup>13</sup>. Both behavioral activation and mindfulness are components in multi-component treatment

1  
2  
3 packages, and as such they might be easier to target in smartphone applications than an entire  
4 treatment program would be, due to the need of simple and fast interaction with the treatment  
5 program.  
6  
7

8  
9 At the same time, research suggests that depression severity is known to be a significant  
10 moderating factor in the treatment of depression. For example, some initial evidence suggests  
11 that there is a difference in efficacy between different forms of CBT in the treatment of the more  
12 severely depressed patients<sup>7,22</sup>. There are also indications that the difference between  
13 antidepressant medication and placebo is evident in severe depression, but not in mild to  
14 moderate depression<sup>23</sup>, and that combined treatments with medication and psychotherapy are  
15 more effective than single treatments<sup>22</sup>. These results suggest that baseline depression severity  
16 may moderate the response to different variants of treatments. Thus, it is concluded that different  
17 treatments distributed digitally can target different subgroups of depression, in terms of severity.  
18 For example, Dimidjian et al. (2006) found that among more severely depressed patients,  
19 behavioral activation was comparable to antidepressant medication, and significantly  
20 outperformed cognitive therapy, whereas for the less severely depressed patients, no differential  
21 treatment effects were observed.  
22  
23  
24  
25

26 The aim of this study was to test the effects of two smartphone-delivered treatments; one based  
27 on behavioral activation and the other on mindfulness. Hence, the main question is whether  
28 behavioral activation is more effective than mindfulness delivered over smartphone. The study  
29 was based on our previous work on guided internet-treatment for depression<sup>24</sup>, but in the current  
30 study the treatment content was delivered entirely via the participants personal smartphone,  
31 using recently developed smartphone applications. We expected, in line with Dimidjian and  
32 coworkers' conclusions (BA relative to CT  $d=0.87$  on BDI), that behavioral activation would be  
33 superior to mindfulness for participants suffering from more severe depression with an expected  
34 between group effect size of Cohen's  $d=0.50$ ). In order to evaluate long-term effects, we also  
35 included a 6-month follow-up after the start of the treatment.  
36  
37  
38  
39

## 40 **Methods**

### 41 **Ethics statement**

42 The study was approved by the Regional Ethics Board of Linköping, Sweden. Written informed  
43 consent was obtained from all participants by surface mail.  
44  
45  
46  
47

### 48 **Recruitment and selection**

49 The participants were mainly recruited via mass media and advertisements in large Swedish  
50 newspapers. Those who were interested were directed to a web page with information about the  
51 study, the treatments being tested and how to participate in the study.  
52  
53  
54

55 Inclusion criteria for the study were a) being at least 18 years old, b) having a point total of  $\geq 5$  on  
56 PHQ-9, c) reported unchanged dosage of medication for depression and anxiety during the last  
57 month, d) not being in any concurrent psychological treatment, e) not suffering from a severe  
58  
59  
60

1  
2  
3 comorbid psychiatric condition that could interfere with the treatment (e.g. bipolar disorder or  
4 schizophrenia, assessed during a clinical interview), f) not having other primary medical  
5 problems which would need other treatments first hand, g) not having severe alcohol problems,  
6 h) no assessed risk of being suicidal (see below for details) and i) major depression according to  
7 the DSM-IV, with at least an episode in partial remission. The diagnosis of MDD was confirmed  
8 by a structured interview (see below). Additionally, an assessment of suicidal ideation was  
9 conducted. The interviews were made over telephone by four MSc clinical psychology students.  
10 The principal research executive reviewed all the protocols from the interviews together with the  
11 interviewers. Questions regarding medication and psychiatric history that came up in the  
12 interview were considered before the decision on inclusion was made.  
13  
14  
15  
16

17 Of the 231 individuals who initially expressed interest in the study, 126 completed all the  
18 questions in the online screening (22 did not finish the screening and 83 did not begin the  
19 screening). Of these, 29 were excluded before the diagnostic interview started. 13 individuals  
20 were excluded after the diagnostic interview. Eighty-four were subsequently included after the  
21 interview had been conducted. Before the study started, three participants chose not to participate  
22 in the study. The reasons for exclusion are specified in the flowchart found in Figure 1.  
23  
24  
25

26 Among the randomized participants there were 70.3 % women ( $n=57$ ) and 29.6 % men ( $n=24$ ).  
27 The mean age was 36.0 years ( $SD=10.8$ ) ranging from 20 to 61 years. See Table 1 for additional  
28 demographical data. There were no significant differences in demographic characteristics  
29 between the groups according to chi-square analysis.  
30  
31  
32

### 33 Outcome measures

34 **Primary outcome measures.** The primary outcome measures were the Beck Depression  
35 Inventory-II (BDI-II; <sup>25</sup>) and the 9-item Patient Health Questionnaire Depression Scale (PHQ-9;  
36 <sup>26 27</sup>) that were administered pre-treatment, at post-treatment and also six months after the  
37 treatment had ended. The PHQ-9 was also administered on a weekly basis during the entire  
38 treatment phase (8 weeks). Hence, there were three measurements on the outcome BDI-II and 10  
39 measurements on the outcome PHQ-9.  
40  
41  
42

43 **Secondary outcome measures.** In addition to the BDI-II and PHQ-9, the Beck Anxiety  
44 Inventory (BAI; <sup>28</sup>), the Quality of Life Inventory (QOLI; <sup>29 30</sup>), the Trimbos and Institute of  
45 Medical Technology Assessment Cost Questionnaire for Psychiatry (TIC-P; <sup>31</sup>) and the  
46 Acceptance and Action Questionnaire (AAQ-II; <sup>32</sup>) were administered. The AAQ-II was  
47 administered on a weekly basis during the entire treatment phase (8 weeks). All other outcome  
48 measures were collected at pre-treatment, post-treatment and at 6-month after the start of the  
49 treatment, except for the TIC-P that was collected at pre-treatment and at 6-month after the  
50 treatment started. Hence, there were two measurements on the outcome TIC-P, three  
51 measurements on the outcomes BAI and QOLI and 10 measurements on the outcome AAQ-II.  
52  
53  
54  
55

56 **Clinician-administered measures.** Psychiatric diagnoses were assessed at pre-treatment, post-  
57 treatment and at 6-month after the start of the treatment, using the Mini-International  
58  
59  
60

1  
2  
3 Neuropsychiatric Interview (M.I.N.I.;<sup>33</sup>). The M.I.N.I. is a diagnostic interview that, in contrast  
4 to several other diagnostic interviews, is completely structured, making it appropriate for other  
5 assessors than experienced psychiatrists<sup>33</sup>. All interviews were conducted by the four  
6 psychology students described above, who at post-treatment were blind to participant's  
7 condition. At the 6-month follow-up, the interviews were conducted by other clinical psychology  
8 students who were blind to both the participant's condition and the treatment they had been  
9 given. Recovery rates were defined as no longer fulfilling the criteria for depression according to  
10 M.I.N.I.  
11  
12

13  
14 **Treatment credibility.** To measure treatment credibility, Borkovec and Nau's  
15 Credibility/expectancy scale (C-Scale)<sup>34</sup> was used. The C-scale measures the way in which  
16 participants view the logic of the treatment (credibility) and the improvements that can be  
17 achieved (expectancy) and includes five items on a 10-point scale. Assessment was made after  
18 the first week of treatment.  
19  
20  
21

### 22 23 **Procedure and design**

24 For those participants included in the study, the results from the online screening were used as  
25 pre-treatment assessment. All measures used have been shown to have good psychometric  
26 properties, with internal consistencies of at least  $\alpha=.79$ . Details of this can be found in the  
27 respective references of the outcome questionnaires. The outcome measures used have  
28 established good psychometric properties, also when administered via the internet<sup>35 36</sup>.  
29  
30  
31

32 After the recruitment, participants were allocated using an online randomization tool  
33 ([www.random.org](http://www.random.org)), handled by an independent person who was separate from the staff  
34 conducting the study.  
35  
36  
37

### 38 39 **The interventions**

40 **Behavioral activation treatment.** An 8-week smartphone-based behavioral activation  
41 intervention with minimal therapist contact was developed by our research group. The  
42 intervention consisted of a short web-based psychoeducation, and a step-by-step behavior  
43 program administered via a smartphone application. The psychoeducation aimed to introduce the  
44 participants to the treatment, touching on topics like the prevalence of depression, its etiology  
45 and maintenance factors based on operant conditioning, as well as the theoretical basis for  
46 behavioral activation. The text was written specially for the current intervention, but inspired by  
47 Martell et al.<sup>37</sup> and Lejuez, Hopko & Hopko<sup>38</sup>. In all, there were three chapters, totaling 11  
48 pages of text, containing 3 893 words.  
49  
50  
51

52 The smartphone application was built as a native application for Iphone and a mobile web  
53 application for other smartphones. See Figure 2 for a screenshot of the application. A prototype  
54 of the smartphone application was tested in a pilot study<sup>39</sup>. This prototype, however, was not  
55 specifically designed for depression interventions. The purpose of the behavioral activation  
56 application was to make it easy for the participant to remember and register important behaviors,  
57  
58  
59  
60

1  
2  
3 in order to increase everyday activation. The application contained a database of 54 behaviors,  
4 divided into three different areas for the participant to add to their application. See Table 2 for  
5 the list of behaviors from the database. The database aimed to provide suggestions, help, and  
6 inspiration to get started with the application. Participants were also able to add their own areas  
7 and behaviors into the application to start tracking. Through the initial psychoeducation, the  
8 participants were guided to add few (between two and four) and easy behaviors from start,  
9 mainly from the database.  
10  
11

12  
13  
14 When a behavior was completed, the participant could mark this in the application and add a  
15 short reflection. Statistics and summaries of quantitative (i.e. behavior frequency) and qualitative  
16 data (i.e. reflections) were presented in the application for the participant.  
17  
18

19  
20 There was also a back-end system where all the quantitative and qualitative data from the  
21 participants was accessible for the therapist. From the back-end system, the therapist could send  
22 short text messages to the participants via a messaging system, similar to Short Message Service  
23 (SMS). The messaging system was used by the therapists to send personal encouraging messages  
24 every other, or every third day to the participants, as well as weekly general educational  
25 messages. The system functioned as a one-way communication, which means that the  
26 participants were not able to reply the messages.  
27  
28

29  
30 Apart from this, the participants were told to write a reflection to summarize every week for their  
31 therapist and send it in via e-mail, in the end of every treatment week. The participants received  
32 personal feedback on their reflection from their therapist. No sensitive data was saved on a  
33 computer, in which the person providing data could be identified. In addition, all internet and  
34 smartphone activities was secured, with encrypted information.  
35  
36

37  
38 **Mindfulness treatment.** The mindfulness intervention, also an 8-week smartphone-based  
39 intervention with minimal therapist contact, consisted of a short web-based psychoeducation, and  
40 a step-by-step mindfulness practice program, administered via a smartphone application. The  
41 psychoeducation for the mindfulness intervention was equivalent to that of the behavioral  
42 activation intervention, except that the theoretical basis of mindfulness was presented instead of  
43 the theoretical basis of behavioral activation. The text was written specially for the current  
44 intervention, but inspired by Williams et al.<sup>40</sup>. In all, there were three chapters, totaling 9 pages  
45 of text, containing 2 927 words.  
46  
47

48  
49 The smartphone application for Iphone was an established and commercially available  
50 application that could be downloaded from the Apple app store. See Figure 3 for a screenshot of  
51 the application. For other smartphones, a mobile web application was built especially for the  
52 current study with the aim of mimicking the Iphone application. The application consisted of a  
53 number of audio tracks with exercises to facilitate the practice of mindfulness. The exercises  
54 were both guided and unguided, and in short (three minutes) and long (30 minutes) format.  
55 Through the initial psychoeducation, the participants were guided to start with short mindfulness  
56 exercises.  
57  
58  
59  
60

1  
2  
3  
4  
5 Since the mindfulness application did not have a communication system such as the behavioral  
6 activation application, e-mails were used to emulate the messaging system in the behavioral  
7 activation application. Hence, the therapists sent encouraging messages every other, or every  
8 third day to the participants, as well as weekly general educational messages via mail. The  
9 difference in how the therapists communicated in the mindfulness intervention, compared with  
10 the behavioral activation intervention, was that the therapists could not give specific feedback on  
11 activities or exercises that the participants had done. Otherwise, the communication was similar  
12 (length and type of content).  
13  
14  
15

16 Additionally, the participants given the mindfulness intervention were also told to write a  
17 reflection to summarize every week for their therapist and send it in via e-mail. The participants  
18 received personal feedback on their reflection from their therapist.  
19  
20  
21

22 **Therapists.** The therapists were four final-semester students from a five-year M.Sc. clinical  
23 psychologist program. All therapists had completed their clinical training as well as 16 weeks of  
24 internship. Each therapist was responsible for the treatment of 8 to 10 participants from the  
25 behavioral activation group and an equal number of participants from the mindfulness group.  
26 Therapists were randomly allocated to participants, with the restriction of not having more than  
27 10 participants from each group. For the entire duration of the study the therapists received  
28 continuous supervision from an experienced psychotherapist with CBT orientation, who had  
29 previous experience of working with a behavioral activation treatment manual.  
30  
31  
32

### 33 **Subgroups based on cut-off scores**

34 All randomized participants were classified into groups of either high or low severity of  
35 depression. These classes were formed based on the cut-offs scores on the PHQ-9. The  
36 participants were considered to suffer from higher severity of depression if they scored  $\geq 10$  on  
37 PHQ-9 and if they fulfilled the criteria for an ongoing primary diagnosis of major depression of  
38 moderate character ( $n=51$ ). Participants, not fulfilling these criteria were considered to suffer  
39 from lower severity of depression ( $n=30$ ).  
40  
41  
42  
43

### 44 **Data analysis**

45 All analyses were performed using SPSS 20 (SPSS, Inc., Chicago, IL). Independent *t*-tests and  
46  $\chi^2$ -tests were used to test for group differences in demographics, pre-treatment data and in  
47 recovery rates. In order to adhere to the intention-to-treat principle, the continuous outcome  
48 variables (except from TIC-P, that was not analyzed as part of this study) were analyzed using  
49 mixed effects models, given their ability to handle missing data<sup>41</sup>. All analyses used Maximum  
50 Likelihood estimation. Random intercept models were selected for all measures. Differences  
51 between the behavioral activation treatment and the mindfulness treatment were primarily  
52 investigated by modeling interaction effects of group and time. For the PHQ-9 and the AAQ-II,  
53 where weekly measures were available, the covariance between the random intercept and slope  
54 was not significant, and therefore was not included in the model. Hence, a random intercept  
55 model was used also for these measures. Between-group differences at post-treatment were  
56  
57  
58  
59  
60

1  
2  
3 analyzed using independent *t*-tests. Power analysis indicated an 89 % chance of detecting a  
4 between-group effect size of  $d=0.60$  ( $\alpha$  level=0.05). Within- and between-group effect sizes  
5 (Cohen's *d*) were calculated by dividing the differences in means by the pooled standard  
6 deviations<sup>42</sup>. This was done both from pre-measurements to post-measurements, and from pre-  
7 measurements to the 6-month follow up data.  
8  
9

## 10 11 12 **Results**

13  
14 The two groups did not differ significantly on any of the measures at pretreatment ( $t=0.50$  to  
15  $0.67$ ,  $df=79$ ,  $p=0.78$  to  $0.50$ ). The results will be presented in the following order: attrition and  
16 adherence, self-report inventories (including effect size) both for the whole sample and the  
17 subgroups, recovery rates and treatment credibility.  
18  
19

### 20 21 **Attrition and adherence**

22 Of the 84 participants randomized, three participants decided not to participate in the study. Nine  
23 out of these 81 participants (11.1 %) did not provide post-treatment data. Six out of these  
24 (totaling 7.4 %) were unreachable for the telephone interview and were classified as unimproved.  
25 In the 6-month follow-up, 69 participants from the two treatment groups (85.2 %) provided data  
26 on the self-report measures and 59 (72.8 %) were reached for the telephone interview. Once  
27 again, those unreachable were classified as unimproved.  
28  
29

30  
31 Adherence to treatment was defined as the number of weekly reflections the participants sent to  
32 their therapist. In order to be considered as a completed week, at least one reflection had to have  
33 been sent to the therapist during that week. Of the 81 participants, 57 (70 %) succeeded to adhere  
34 to all the eight weeks. Of these, 25 (63 %) were in the behavioral activation group and 32 (78 %) were in the mindfulness group. In average, participants succeeded to adhere to six weeks ( $M=5.8$ ,  $SD=2.47$ ).  
35  
36  
37  
38  
39

### 40 41 **Primary outcome measure**

42 No significant interaction effects of group and time on the PHQ-9 and the BDI-II were found  
43 between the groups, neither from pre-treatment to post-treatment (PHQ-9: ( $F(1, 501.47)=.28$ ,  
44  $p's=.60$ ); BDI-II: ( $F(1, 74.11)=.28$ ,  $p's=.60$ )), nor from pre-treatment to the 6-month follow up  
45 (PHQ-9: ( $F(1, 571.49)=.36$ ,  $p's=.55$ ); BDI-II: ( $F(1, 147.96)=.09$ ,  $p's=.77$ )). However, as evident  
46 from Table 3, large within-group effect sizes were found on PHQ-9 and BDI-II, between pre-  
47 treatment and post-treatment, as well as between pre-treatment to the 6-month follow up. This  
48 was the case for both the behavioral activation treatment and the mindfulness-treatment.  
49  
50

### 51 52 **Subgroup analyses**

53 For the participants suffering from high severity of depression ( $\geq 10$  on the PHQ-9 and an  
54 ongoing primary diagnosis of major depression of moderate character), a mixed-effects model  
55 analysis on the PHQ-9 revealed significant interaction effects of group and time in favor for the  
56 behavioral activation group. Thus, the results indicated a difference between the groups from  
57  
58  
59  
60

pre-treatment to 6-month follow-up ( $F(1, 362.1)=5.2, p's<.05$ ). As seen in Table 3, the effect size between the groups at 6-month follow-up was small, but close to medium (Cohen's  $d=0.47$ ; CI [-1.46, 2.40]).

For the more mildly depressed participants there was a significant effect in favor of the mindfulness group from pre-treatment to 6-month follow-up on both the PHQ-9 ( $F(1, 69.3)=7.7, p's<.01$ ) and the BDI-II ( $F(1, 53.60)=6.25, p's<.05$ ). The effect sizes were, as evident from Table 3, large (PHQ-9: Cohen's  $d=0.98$ ; CI [-0.72, 2.68]; BDI-II: Cohen's  $d=1.21$ ; CI [-1.71, 4.13]).

### Secondary outcome measure

As evident from Table 3 no significant interaction effects were found on the secondary measures neither from pre-treatment to post-treatment (BAI: ( $F(1, 74.05)=1.30, p's=.26$ ); AAQ-II: ( $F(1, 570.00)=.07, p's=.79$ ); QOLI: ( $F(1, 76.43)=.106, p's=.31$ )), nor from pre-treatment to the 6-month follow up (BAI: ( $F(1, 147.01)=.35, p's=.56$ ); AAQ-II: ( $F(1, 639.00)=.11, p's=.74$ ); QOLI: ( $F(1, 148.61)=.39, p's=.53$ )). Nevertheless, as shown in table 3, medium to large within-group effect sizes were revealed on all secondary outcome measures. This was evident for both groups, and on pre-treatment to post-treatment, as well as on pre-treatment to the 6-month follow up.

### Recovery rates

There were no significant differences in recovery rates between the groups, neither at post-treatment nor at the 6-month follow-up. This was the case both when analyzing the whole sample as well as the subgroups. When analyzing the whole sample, 73.5 % ( $n=25$ ) in the behavioral activation group recovered after treatment, compared to 53.1 % ( $n=17$ ) in the mindfulness group ( $\chi^2(N=66, df=1)=2.97, p=.07$ ). At the 6-month follow-up, 30 out of 34 participants (88.2 %) from the behavioral activation group had recovered, and 26 out of 32 participants (81.3 %) from the mindfulness group had recovered ( $\chi^2(N=66, df=1)=.63, p=.33$ ).

When analyzing only the severe depressed participants, there was a tendency in favor for the behavioral activation group. Among the severely depressed participants, 73.9 % ( $n=17$ ) in the behavioral activation group recovered after treatment, compared to 50.0 % ( $n=14$ ) in the mindfulness group ( $\chi^2(N=51, df=1)=3.03, p=.07$ ). At the 6-month follow-up, 21 out of 23 participants (91.3 %) from the behavioral activation group had recovered, and 22 out of 28 participants (78.6 %) from the mindfulness group had recovered ( $\chi^2(N=51, df=1)=1.55, p=.20$ ).

### Treatment credibility and therapist time

The credibility of the two treatments showed a mean score of 31.9 ( $SD=7.1$ ) for the behavioral activation group and at 32.1 ( $SD=7.8$ ) for the mindfulness group on the Borkovec and Nau c-Scale<sup>34</sup>.



1  
2  
3 An independent t-test showed no significant difference between the two groups on the C-scale ( $t$   
4 (78)=0.12,  $p=0.90$ ). Furthermore, the C-scale did not correlate significantly with any of the  
5 outcome measures, either for all participants combined ( $r=0.13$ ,  $p=0.27$ ), for the behavioral  
6 activation group ( $r=0.01$ ,  $p=0.92$ ) or for the mindfulness group ( $r = .23$ ,  $p = .18$ ).  
7  
8  
9

10 The therapist time per participant and week varied depending on whether the participant had sent  
11 a reflection or not. The therapists reported a span between 2 and 18 minutes per week and  
12 participants. However, the therapist time did not differ between the two treatment groups.  
13  
14

## 15 Discussion

16  
17 The overall aim of this study was to investigate the effects of two smartphone-delivered  
18 treatments for people suffering from mild to moderate major depression; one based on behavioral  
19 activation and the other on mindfulness. Hence, the main question was whether behavioral  
20 activation is more effective than mindfulness delivered over smartphone. When analyzing the  
21 whole sample as one entity, the result showed that the two interventions did not differ  
22 significantly from one another; neither from pre-treatment to post-treatment, nor from pre-  
23 treatment to the 6-month follow-up on any of the outcome measures. Also, there were no  
24 significant differences in recovery rates between the groups, neither at post-treatment nor at the  
25 6-month follow-up.  
26  
27  
28  
29  
30  
31

32 This study also explored how different levels of initial depression severity could moderate  
33 response to the different interventions. All randomized participants were classified into either  
34 high or low severity of depression based on the cut-offs scores on the PHQ-9 and if they fulfilled  
35 the criteria for an ongoing primary diagnosis of major depression. For participants with higher  
36 severity of depression, the treatment based on behavioral activation was superior to the treatment  
37 based on mindfulness, as measured with PHQ-9. In contrast, for participants with lower initial  
38 severity, the treatment based on mindfulness worked better than the treatment based on  
39 behavioral activation, as measured with PHQ-9 and BDI-II.  
40  
41  
42  
43

44 The result from the analysis of the higher severity participants is in line with earlier<sup>7</sup> findings.  
45 For example, Dimidjian et al (2006) showed that behavioral activation was comparable in  
46 efficacy to antidepressant medication, and more efficacious than cognitive therapy - but only  
47 among those patients who were more severely depressed. In line with this, Beck and colleagues  
48<sup>43</sup> have long suggested that therapists should focus on behavioral strategies early in treatment  
49 when patients are more depressed and return to that emphasis later if patients start to worsen.  
50  
51

52 The result from the analysis of the less severely depressed participants was unexpected to us.  
53 Although there is yet only initial evidence that mindfulness treatment is effective for acute or  
54 severely depressed<sup>44 45</sup>, mindfulness has proven to be effective for relapse prevention of  
55 depression<sup>20 46 47</sup>. That gives implications that a mindfulness-based treatment administered  
56 through smartphone will work better for people suffering from mild depression. However, the  
57  
58  
59  
60

1  
2  
3 fact that the mindfulness-based treatment worked significantly better than the behavioral  
4 activation-treatment was surprising to us. One explanation could be that the less severely  
5 depressed participants suffered more from stress and anxiety rather than depression. This  
6 population would then not be in need of a treatment that encourages more activation. Instead, a  
7 mindfulness treatment could work very well for this kind of problems<sup>19 48</sup>.

8  
9  
10 Moreover, the results showed that the two interventions were effective for treating depression  
11 with large within-group effect sizes and large recovery rates, which are comparable to other  
12 depression treatment. This indicates that this smartphone format might work well for a depressed  
13 population.  
14

### 15 16 17 **Limitations**

18 There are a number of limitations that need to be mentioned. The first is that no wait list group  
19 was included. However, our main research question was to assess whether behavioral activation  
20 is more effective than mindfulness delivered over smartphone. Hence, we wanted to isolate all  
21 other components, such as the therapist support and the psychoeducation, and only investigate  
22 the two smartphone applications.  
23

24  
25 A second limitation is that the study was underpowered. Thus, it is difficult to detect significant  
26 overall differences between the two smartphone-treatments, even if significant interaction effects  
27 were found when using mixed effects models with PHQ-9 in the subgroup analyses. A post-hoc  
28 power analysis revealed that a sample of 393 participants was required to detect small between-  
29 group effects. We were not expecting that the mindfulness treatment would be as effective and  
30 powered the trial as if a moderate between-group effect would be found.  
31  
32

33 A third limitation was that the participants were recruited nationally through mass media and  
34 advertisements. Thus, we cannot be sure that this treatment would work in a clinical setting, e.g.  
35 an outpatient psychiatric facility. However, mean depression severity as measured by the BDI-II  
36 at intake ( $M=24.10$ ) is rather close to the limit of 29 proposed for defining severe depression<sup>25</sup>.  
37  
38

39 Fourth, we recruited a broad range of participants, with regards to the severity of depression (a  
40 minimum of 8 and a maximum of 44 on BDI-II at intake). This makes it difficult to target a  
41 specific group for whom the treatments would be effective. Nevertheless, a subgroup analysis  
42 showed that participants with higher severity of depression responded to the behavioral  
43 activation significantly better than the treatment based on mindfulness, whereas the treatment  
44 based on mindfulness worked significantly better than the treatment based on behavioral  
45 activation for the participants with lower initial. Additionally, it can be argued that these broad  
46 inclusion criteria reflect a real population of individuals with depressive disorders.  
47  
48

49 A fifth related concern was the large number of participants who had college- or university level  
50 education (65.5 %). This might bias generalizability of the results, since it is possible that guided  
51 self-help is especially well suited for educated clients. However, there are data indicating that 50  
52 % of patients seeking psychotherapy have some college education<sup>49</sup> and that educated patients  
53 may be more inclined to seek help for mental health problems<sup>50</sup>.  
54  
55  
56  
57  
58  
59  
60

## Conclusion

Some clinical implications of this study are discussed as follows. Due to the need for simple and fast interaction with the treatment program, singular treatment components such as behavioral activation and mindfulness might be a better target for smartphone applications than entire multi-component treatment packages. At the same time, there is a need for guided self-help treatments distributed digitally that can reach out to more patients. This study is one of the first to test a treatment for depression, administered via smartphone. The large within-group effects on the primary outcome measures, as well as the large recovery rates for both groups are comparable to other depression treatments, and indicate that this smartphone format with a small amount of text and minimal therapist support, might work well for a depressed population.

Moreover, this study also shows that behavioral activation might work better for a more severely depressed population, whereas mindfulness might work better for people suffering from light depression. These results strengthen the hypothesis that different treatments distributed digitally can target different subgroups of depression, in terms of severity.

From a broader perspective, we believe that smartphones will be integrated even further in society since they are already socially accepted as well as relatively cheap for the functionalities you get<sup>13</sup>, and therefore may serve an important role in health care. Therefore these results, showing that mild to moderate depression can be treated effectively by means of a supported smartphone-application, might be important in the future of making depression treatment and other psychological treatment more assimilated into people's daily life. As suggested in Ly et al. (2012), the smartphone format might also help increasing the awareness of being in treatment in everyday settings, and therefore better help clients create direct incentives for treatment related activities in their everyday life<sup>39</sup>. Using smartphones to distribute psychological treatment might also help making it possible to reach out with psychological therapy to a broader group of people, since their use attracts no attention<sup>13</sup>, allowing users to interact with a device without fear of judgment or stigma. Lastly, psychological treatments distributed via smartphones are not only relevant for Swedish conditions but also for the developing countries in the world, which increasingly are empowered by mobile phones with internet connection.

This study might open up for a broad range of other trials conducted via smartphones, both for self-help interventions as well as adjunct tools in face-to-face treatments. We believe that a substantial part of internet-based interventions in the future will be executed through smartphones or at least supported by smartphones. Further studies should focus on both formats, as well as expanding the treatment platform to other psychological disorders.

## Trial registration

Clinical Trials NCT01463020

## Competing interests

A related version of the behavioral activation application is currently developed for the open market by KHL.

## Author's contributions

KHL was the project manager and has developed the application. KHL also participated in the drafting of the treatment manuals, and participated in analysis and interpretation of data. GA participated in the conception of the study and its design. GA also participated in the drafting of treatment manuals, analysis and interpretation of data, and performed statistical analysis. PC participated in the conception of the study and its design. RJ participated in analysis and interpretation of data, and performed statistical analysis. AT, LJ, SM and TW participated in the drafting of treatment manuals and performed the treatments. KHL and GA drafted the current manuscript. PC and RJ participated in revision of the current manuscript. All authors read and approved the final manuscript.

## Trial protocol

The full trial protocol can be found at: <http://www.trialsjournal.com/content/13/1/62>

## Funding

The Swedish Research Council sponsored this study with funding. 2011-2476

## References

1. Ebmeier K, Donaghey C, Steele J. Recent developments and current controversies in depression. *Lancet* 2006;367:153 - 67.
2. Smit F, Cuijpers P, Oostenbrink J, Batelaan N, de Graaf R, Beekman A. Costs of nine common mental disorders: implications for curative and preventive psychiatry. *J Ment Health Policy Econ* 2006;9:193 - 200.
3. Cuijpers P, van Straten A, Andersson G, van Oppen P. Psychotherapy for depression in adults: a meta-analysis of comparative outcome studies. *J Consult Clin Psychol* 2008;76(6):909-22.
4. Cuijpers P, van Straten A, Warmerdam L. Behavioral activation treatments of depression: a meta-analysis. *Clin Psychol Rev* 2007;27:318 - 26.
5. Dimidjian S, Barrera M, Martell C, Munoz R, Lewinsohn P. The origins and current status of behavioral activation treatments for depression. *Annu Rev Clin Psych* 2011;7:1 - 38.
6. Jacobson N, Dobson K, Truax P, Addis M, Koerner K, Gollan J, et al. A component analysis of cognitive-behavioral treatment for depression. *J Consult Clin Psych* 1996;64:295 - 304.
7. Dimidjian S, Hollon SD, Dobson KS, Schmalzing KB, Kohlenberg RJ, Addis ME, et al. Randomized trial of behavioral activation, cognitive therapy, and antidepressant medication in the acute treatment of adults with major depression. *J Consult Clin Psychol* 2006;74(4):658-70.
8. Andrews G, Cuijpers P, Craske MG, McEvoy P, Titov N. Computer Therapy for the Anxiety and Depressive Disorders Is Effective, Acceptable and Practical Health Care: A Meta-Analysis. *PLoS ONE* 2010;5(10):e13196.
9. Cuijpers P, Donker T, van Straten A, Li J, Andersson G. Is guided self-help as effective as face-to-face psychotherapy for depression and anxiety disorders? A systematic review and meta-analysis of comparative outcome studies. *Psychol Med* 2010;40(12):1943-57.
10. Carlbring P, Hagglund M, Luthstrom A, Dahlin M, Kadowaki A, Vernmark K, et al. Internet-based behavioral activation and acceptance-based treatment for depression: A randomized controlled trial. *Journal of affective disorders* 2013;148(2-3):331-7.
11. Andersson G. Using the Internet to provide cognitive behaviour therapy. *Behav Res Ther* 2009;47(3):175-80.
12. Watts S, Mackenzie A, Thomas C, Griskaitis A, Mewton L, Williams A, et al. CBT for depression: a pilot RCT comparing mobile phone vs. computer. *BMC psychiatry* 2013;13:49.
13. Boschen M, Casey L. The use of mobile telephones as adjuncts to cognitive behavioral psychotherapy. *Prof Psychol-Res Pr* 2008;39:546 - 52.
14. Segal ZV, Williams JMG. *Mindfulness-based cognitive therapy for depression*: Guilford Press, 2012.
15. Linehan M. *Cognitive-behavioral treatment of borderline personality disorder*: The Guilford Press, 1993.
16. Hayes SC, Strosahl KD, Wilson KG. *Acceptance and commitment therapy: An experiential approach to behavior change*: Guilford Press New York, 2003.
17. Cash M, Whittingham K. What facets of mindfulness contribute to psychological well-being and depressive, anxious, and stress-related symptomatology? *Mindfulness* 2010;1(3):177-82.
18. Brown KW, Ryan RM. The benefits of being present: mindfulness and its role in psychological well-being. *J Pers Soc Psychol* 2003;84(4):822-48.
19. Hofmann SG, Sawyer AT, Witt AA, Oh D. The effect of mindfulness-based therapy on anxiety and depression: A meta-analytic review. *J Consult Clin Psychol* 2010;78(2):169-83.
20. Piet J, Hougaard E. The effect of mindfulness-based cognitive therapy for prevention of relapse in recurrent major depressive disorder: a systematic review and meta-analysis. *Clinical psychology review* 2011;31(6):1032-40.

- 1
- 2
- 3 21. Ljotsson B, Hedman E, Lindfors P, Hursti T, Lindefors N, Andersson G, et al. Long-term follow-up of
- 4 internet-delivered exposure and mindfulness based treatment for irritable bowel syndrome.
- 5 *Behav Res Ther* 2011;49(1):58-61.
- 6
- 7 22. Cuijpers P, Andersson G, Donker T, van Straten A. Psychological treatment of depression: results of a
- 8 series of meta-analyses. *Nord J Psychiatry* 2011;65(6):354-64.
- 9
- 10 23. Fournier JC, DeRubeis RJ, Hollon SD, Dimidjian S, Amsterdam JD, Shelton RC, et al. Antidepressant
- 11 drug effects and depression severity: a patient-level meta-analysis. *JAMA* 2010;303(1):47-53.
- 12
- 13 24. Andersson G, Bergstrom J, Hollandare F, Carlbring P, Kaldø V, Ekselius L. Internet-based self-help for
- 14 depression: randomised controlled trial. *The British journal of psychiatry : the journal of mental*
- 15 *science* 2005;187:456-61.
- 16
- 17 25. Beck AT, Steer RA, Brown BK. *Beck Depression Inventory manual*, 1996.
- 18
- 19 26. Titov N, Dear BF, McMillan D, Anderson T, Zou J, Sunderland M. Psychometric Comparison of the
- 20 PHQ-9 and BDI-II for Measuring Response during Treatment of Depression. *Cognitive Behaviour*
- 21 *Therapy* 2011;40(2):126-36.
- 22
- 23 27. Kroenke K, Spitzer R, Williams J. The PHQ-9: validity of a brief depression severity measure. *J Gen*
- 24 *Intern Med* 2001;16:606 - 13.
- 25
- 26 28. Beck A, Epstein N, Brown G, Steer R. An inventory for measuring clinical anxiety: psychometric
- 27 properties. *J Consult Clin Psych* 1988;56:893 - 97.
- 28
- 29 29. Lindner PA, G.; Öst, L.-G.; Carlbring, P. Validation of the Internet-administered Quality of Life
- 30 Inventory (QOLI) in different psychiatric conditions. *Cognitive Behaviour Therapy* in press.
- 31
- 32 30. Frisch M, Cornell J, Villanueva M. Clinical validation of the Quality of life inventory: a measure of life
- 33 satisfaction for use in treatment planning and outcome assessment. *Psychol Assessment*
- 34 1992;4:92 - 101.
- 35
- 36 31. Hakkaart-van Roijen L, Straten Av, Tiemens B, Donker M. Handleiding Trimbos/iMTA questionnaire
- 37 for Costs associated with Psychiatric illness (TIC-P): Institute of Medical Technology Assessment
- 38 (iMTA), 2002.
- 39
- 40 32. Hayes S, Strosahl K, Bunting K, Twohig M, Wilson K. What is Acceptance and Commitment Therapy?
- 41 *A Practical Guide to Acceptance and Commitment Therapy* 2004:1 - 30.
- 42
- 43 33. Sheehan DV, Lecrubier Y, Sheehan KH, Amorim P, Janavs J, Weiller E, et al. The Mini-International
- 44 Neuropsychiatric Interview (M.I.N.I.): the development and validation of a structured diagnostic
- 45 psychiatric interview for DSM-IV and ICD-10. *J Clin Psychiatry* 1998;59 Suppl 20:22-33;quiz 34-
- 46 57.
- 47
- 48 34. Borkovec TD, Nau SD. Credibility of analogue therapy rationales. *Journal of Behavior Therapy and*
- 49 *Experimental Psychiatry* 1972;3(4):257-60.
- 50
- 51 35. Carlbring P, Brunt S, Bohman S, Austin D, Richards J, Vñst LG, et al. *Computers in Human Behaviour*
- 52 2007;23(null):1421.
- 53
- 54 36. Hollandare F, Andersson G, Engstrom I. A comparison of psychometric properties between internet
- 55 and paper versions of two depression instruments (BDI-II and MADRS-S) administered to clinic
- 56 patients. *J Med Internet Res* 2010;12(5):e49.
- 57
- 58 37. Martell CR, Addis ME, Jacobson NS. *Depression in context: Strategies for guided action*: WW Norton
- 59 & Co, 2001.
- 60
38. Lejuez CW, Hopko DR, Hopko SD. A brief behavioral activation treatment for depression treatment
- manual. *Behavior Modification* 2001;25(2):255-86.
39. Ly K, Dahl J, Carlbring P, Andersson G. Development and initial evaluation of a smartphone
- application based on acceptance and commitment therapy. *SpringerPlus* 2012;1(1):11.
40. Williams JMG, Teasdale JD, Segal ZV. *The mindful way through depression: Freeing yourself from*
- chronic unhappiness*: The Guilford Press, 2007.

- 1  
2  
3 41. Gueorguieva R, Krystal JH. Move over ANOVA: progress in analyzing repeated-measures data and its  
4 reflection in papers published in the Archives of General Psychiatry. *Arch Gen Psychiatry*  
5 2004;61(3):310-7.  
6  
7 42. Borenstein M, Hedges LV, Higgins JP, Rothstein HR. *Introduction to meta-analysis*: Wiley, 2011.  
8 43. Beck AT. *Cognitive therapy of depression*: The Guilford Press, 1979.  
9 44. Manicavasgar V, Parker G, Perich T. Mindfulness-based cognitive therapy vs cognitive behaviour  
10 therapy as a treatment for non-melancholic depression. *J Affect Disord* 2011;130(1-2):138-44.  
11 45. Kenny MA, Williams JM. Treatment-resistant depressed patients show a good response to  
12 Mindfulness-based Cognitive Therapy. *Behav Res Ther* 2007;45(3):617-25.  
13 46. *Psykologisk behandling vid depression : teorier, terapimetoder och forskning A1 - Andersson, Gerhard*  
14 *Y1 - 2012*.  
15 47. Andersson G. *Psykologisk behandling vid depression: teorier, terapimetoder och forskning*. 2012.  
16 48. Bishop SR. What do we really know about mindfulness-based stress reduction? *Psychosom Med*  
17 2002;64(1):71-83.  
18 49. Vessey JT, Howard KI. Who seeks psychotherapy? *Psychotherapy: Theory, Research, Practice,*  
19 *Training* 1993;30(4):546.  
20 50. Howard KI, Cornille TA, Lyons JS, Vessey JT. Patterns of mental health service utilization. *Archives of*  
21 *General Psychiatry* 1996.  
22  
23  
24  
25  
26  
27  
28  
29  
30  
31  
32  
33  
34  
35  
36  
37  
38  
39  
40  
41  
42  
43  
44  
45  
46  
47  
48  
49  
50  
51  
52  
53  
54  
55  
56  
57  
58  
59  
60

**Table 1.** Demographic description of the participants at randomization.

|                                           |                             | <b>Behavioral activation<br/>(N = 40)</b> | <b>Mindfulness<br/>(N = 41)</b> | <b>Total<br/>(N = 81)</b> |
|-------------------------------------------|-----------------------------|-------------------------------------------|---------------------------------|---------------------------|
| <b>Age</b>                                | Mean (SD)                   | 36.6 (10.5)                               | 35.6 (11.3)                     | 36.1 (10.8)               |
|                                           | Min-Max                     | 20-59                                     | 21-61                           | 20-61                     |
| <b>Gender</b>                             | Female                      | 28 (70 %)                                 | 29 (70.7 %)                     | 57 (70 %)                 |
|                                           | Male                        | 12 (30 %)                                 | 12 (29.3 %)                     | 24 (30 %)                 |
| <b>Marital status</b>                     | Single                      | 15 (37.5 %)                               | 15 (36.6 %)                     | 30 (37 %)                 |
|                                           | Married                     | 19 (47.5 %)                               | 24 (58.6 %)                     | 43 (53.2 %)               |
|                                           | Divorced/widow/widower      | 5 (12.5 %)                                | 1 (2.4 %)                       | 6 (7.4 %)                 |
|                                           | Other                       | 1 (2.5 %)                                 | 1 (2.4 %)                       | 2 (2.4 %)                 |
| <b>Highest educational level</b>          | Nine year compulsory school | 1 (2.5 %)                                 | 2 (4.9 %)                       | 3 (3.8 %)                 |
|                                           | Secondary school            | 11 (27.5 %)                               | 14 (34.1 %)                     | 25 (30.9 %)               |
|                                           | College/university          | 27 (67.5 %)                               | 24 (58.5 %)                     | 51 (63 %)                 |
|                                           | Other                       | 1 (2.5 %)                                 | 1 (2.4 %)                       | 2 (2.5 %)                 |
| <b>Employment status</b>                  | Employed/student            | 35 (87.5 %)                               | 30 (73.2 %)                     | 65 (80.2 %)               |
|                                           | Unemployed                  | 3 (7.5 %)                                 | 3 (7.3 %)                       | 6 (7.4 %)                 |
|                                           | Retired                     | 0 (0 %)                                   | 1 (2.4 %)                       | 1 (1.2 %)                 |
|                                           | Other                       | 2 (6.3 %)                                 | 7 (17.1 %)                      | 9 (11.1 %)                |
| <b>Type of Smartphone Medication</b>      | Iphone                      | 24 (60 %)                                 | 23 (56.1 %)                     | 47 (58 %)                 |
|                                           | Android                     | 16 (40 %)                                 | 18 (43.9 %)                     | 34 (42 %)                 |
|                                           | Yes, earlier                | 10 (25 %)                                 | 13 (31.7 %)                     | 23 (28.4 %)               |
|                                           | Yes, present                | 12 (30 %)                                 | 14 (34.1 %)                     | 26 (32.1 %)               |
|                                           | None                        | 18 (45 %)                                 | 14 (34.1 %)                     | 32 (39.5 %)               |
| <b>Psychological treatment</b>            | Yes, earlier                | 19 (47.5 %)                               | 23 (56.1 %)                     | 42 (51.9 %)               |
|                                           | None                        | 21 (52.5 %)                               | 18 (43.9 %)                     | 39 (48.1 %)               |
| <b>Experience of self-help literature</b> | Yes                         | 12 (30 %)                                 | 13 (31.7 %)                     | 25 (30.9 %)               |
|                                           | None                        | 28 (70 %)                                 | 28 (68.3 %)                     | 56 (69.1 %)               |
| <b>Diagnosis</b>                          | Depression                  | 34 (85 %)                                 | 32 (78 %)                       | 66 (82.5 %)               |
|                                           | With dysthymia              | 22 (55 %)                                 | 18 (44 %)                       | 40 (49 %)                 |
|                                           | Earlier episodes            | 31 (77.5 %)                               | 34 (83 %)                       | 65 (80 %)                 |
|                                           | Panic disorder              | 1 (2.5 %)                                 | 3 (7.5 %)                       | 4 (5 %)                   |
|                                           | Social phobia               | 6 (15 %)                                  | 7 (17 %)                        | 13 (16 %)                 |
|                                           | GAD                         | 19 (47.5 %)                               | 10 (24.5 %)                     | 29 (36 %)                 |

**Table 2.** List of behaviors in the database.



**Everyday structure**

Get out of bed when the bell rings in the morning  
 Take a shower  
 Get ready in the morning  
 Eat breakfast  
 Read the newspaper  
 Make a meal plan for each day of the week  
 Make a shopping list for meals  
 Buy food for the meals you have planned  
 Prepare a simple meal  
 Clean a part of my home  
 Clean at least 15 minutes  
 Washing dishes immediately after a meal  
 Wash my clothes  
 Plan my TV viewing from TV schedules  
 Turn off the TV before 21:00 if I'm still watching TV  
 Turn off the computer before 21:00 if I'm still on the Internet  
 Take a brisk walk for 10 minutes  
 Log in to my online banking and pay a bill  
 Entering my weekly activities in my calendar

**Social behaviors**

Texting a friend and ask what he / she does  
 Call a friend and ask what the situation is  
 Take a walk with a friend  
 Book a meeting with someone in my family  
 Suggest a coffee with a friend or family member  
 Suggest a lunch with a friend or family member  
 Go to the playground with my kids  
 Bake something with my children  
 Meet a friend in the evening and ask how your day was  
 Watching an episode of a TV series with a friend  
 Go to the movies with a friend  
 Cooking with someone

**New activities**

Buy or borrow a book I wanted to read  
 Read at least 20 minutes out of a book  
 Go to a new cafe and coffee  
 Look up the nearest training center is  
 Read on about training online  
 Post a workout plan for the week  
 Ask a friend if he / she wants to come along and train  
 Spend at least 30 minutes of physical activity  
 Listen to a radio program  
 Watch a documentary on TV  
 Eat a good meal out  
 Write down at least two good things that happened around me  
 Rent a movie and have a night in  
 Look up the exhibits that are in my city  
 See an exhibition at a museum  
 Look up the concerts that are relevant right now  
 Go to a concert  
 Look up current things happening in my city  
 Attend a church service  
 Solve a crossword  
 Make a Sudoku  
 Listen to music without doing anything else and focus on what I hear  
 Go to town and buy something nice for myself

**Table 3.** Means, SDs and effect sizes (Cohen's *d*) for measures of depression, anxiety, psychological flexibility and quality of life.

| Mean (SD) | Effect size, <i>d</i> (95% CI) |
|-----------|--------------------------------|
|-----------|--------------------------------|

| Outcome measure | Pre-treatment | Post-treatment | 6-month follow-up | Between-group, pre-post | Between-group, pre-6FU | Within-group, pre-post | Within-group, pre-6FU |
|-----------------|---------------|----------------|-------------------|-------------------------|------------------------|------------------------|-----------------------|
| Total           |               |                |                   |                         |                        |                        |                       |
| BDI-II          |               |                |                   |                         |                        |                        |                       |
| BA              | 23.50 (7.85)  | 10.89 (5.92)   | 12.71 (10.56)     | 0.25                    | 0.03                   | 1.83 (0.27-3.38)       | 1.19 (-0.87-3.24)     |
| MF              | 24.68 (9.47)  | 12.94 (10.18)  | 13.09 (12.24)     | (-1.65-2.15)            | (-2.63-2.69)           | 1.21 (-0.95-3.38)      | 1.09 (-1.32-3.50)     |
| PHQ-9           |               |                |                   |                         |                        |                        |                       |
| BA              | 12.53 (4.43)  | 5.83 (3.85)    | 6.77 (5.83)       | 0.28                    | 0.15                   | 1.63 (0.71-2.56)       | 1.14 (-0.01-2.28)     |
| MF              | 13.22 (4.81)  | 7.19 (5.84)    | 7.74 (7.33)       | (-0.85-1.40)            | (-1.39-1.69)           | 1.15 (-0.02-2.32)      | 0.91 (-0.44-2.27)     |
| BAI             |               |                |                   |                         |                        |                        |                       |
| BA              | 14.60 (9.09)  | 8.81 (5.77)    | 8.34 (8.50)       | 0.06                    | 0.01                   | 0.76 (-0.95-2.47)      | 0.72 (-1.25-2.69)     |
| MF              | 13.51 (9.31)  | 9.22 (7.68)    | 8.38 (7.48)       | (-1.49-1.61)            | (-1.86-1.87)           | 0.51 (-1.39-2.40)      | 0.61 (-1.30-2.51)     |
| AAQ-II          |               |                |                   |                         |                        |                        |                       |
| BA              | 27.28 (7.05)  | 21.22 (8.24)   | 20.09 (9.28)      | 0.22                    | 0.10                   | 0.80 (-0.89-2.50)      | 0.89 (-0.93-2.72)     |
| MF              | 28.22 (7.09)  | 23.32 (10.82)  | 21.03 (9.68)      | (-1.97-2.41)            | (-2.10-2.31)           | 0.56 (-1.44-2.54)      | 0.87 (-1.00-2.74)     |
| QoLI            |               |                |                   |                         |                        |                        |                       |
| BA              | -0.45 (1.38)  | 0.92 (1.66)    | 1.15 (2.40)       | 0.05                    | 0.01                   | 0.91 (0.58-1.25)       | 0.84 (0.41-1.27)      |
| MF              | -0.20 (1.51)  | 0.84 (1.90)    | 1.13 (2.07)       | (-0.36-0.45)            | (-0.53-0.51)           | 0.62 (0.24-0.99)       | 0.75 (0.36-1.15)      |
| H-L Dep         |               |                |                   |                         |                        |                        |                       |
| BDI-II          |               |                |                   |                         |                        |                        |                       |
| BA              | 26.87 (7.14)  | 12.00 (6.31)   | 11.81 (10.63)     | 0.42                    | 0.39                   | 2.25 (0.33-4.18)       | 1.72 (-0.87-4.31)     |
| MF              | 28.00 (8.61)  | 15.68 (10.76)  | 16.28 (12.71)     | (-2.09-2.93)            | (-2.95-3.73)           | 1.62 (-0.44-3.67)      | 1.32 (-1.07-3.71)     |
| PHQ-9           |               |                |                   |                         |                        |                        |                       |
| BA              | 15.52 (3.29)  | 6.64 (4.42)    | 6.48 (5.59)       | 0.36                    | 0.47                   | 2.34 (1.23-3.45)       | 2.04 (0.73-3.35)      |
| MF              | 15.57 (3.35)  | 8.60 (6.29)    | 9.60 (7.71)       | (-1.17-1.90)            | (-1.46-2.40)           | 1.43 (0.13-2.74)       | 1.05 (-0.49-2.58)     |
| BAI             |               |                |                   |                         |                        |                        |                       |
| BA              | 17.43 (9.37)  | 9.18 (6.68)    | 9.62 (8.91)       | 0.20                    | 0.01                   | 1.03 (-1.30-3.37)      | 0.87 (-1.77-3.52)     |
| MF              | 15.57 (9.39)  | 10.68 (8.39)   | 9.72 (7.91)       | (-1.94-2.34)            | (-2.36-2.38)           | 0.56 (-1.80-2.92)      | 0.68 (-1.62-2.99)     |
| AAQ-II          |               |                |                   |                         |                        |                        |                       |
| BA              | 28.27 (7.21)  | 21.68 (8.90)   | 19.33 (9.27)      | 0.44                    | 0.47                   | 0.83 (-1.47-3.14)      | 1.11 (-1.28-3.49)     |
| MF              | 29.04 (6.50)  | 25.87 (10.52)  | 23.56 (9.33)      | (-2.30-3.18)            | (-2.16-3.09)           | 0.38 (-1.90-2.65)      | 0.70 (-1.40-2.80)     |
| QoLI            |               |                |                   |                         |                        |                        |                       |
| BA              | -0.51 (1.30)  | 0.78 (1.58)    | 1.25 (2.07)       | 0.26                    | 0.34                   | 0.91 (0.50-1.33)       | 1.05 (0.56-1.55)      |
| MF              | -0.71 (1.18)  | 0.38 (1.58)    | 0.53 (2.23)       | (-0.70-0.18)            | (-0.95-0.27)           | 0.80 (0.44-1.17)       | 0.72 (0.26-1.18)      |
| L-L Dep         |               |                |                   |                         |                        |                        |                       |
| BDI-II          |               |                |                   |                         |                        |                        |                       |
| BA              | 18.94 (6.47)  | 9.14 (4.96)    | 14.07 (10.71)     | -0.51                   | -1.21                  | 1.74 (-0.25-3.72)      | 0.58 (-2.36-3.52)     |
| MF              | 17.54 (7.09)  | 6.73 (4.86)    | 4.22 (3.63)       | (-2.36-1.34)            | (-4.13-1.71)           | 1.83 (-0.54-4.19)      | 2.35 (-0.03-4.72)     |
| PHQ-9           |               |                |                   |                         |                        |                        |                       |
| BA              | 8.47 (1.59)   | 4.57 (2.34)    | 7.21 (6.36)       | -0.23                   | -0.98                  | 2.06 (1.39-2.72)       | 0.30 (-1.21-1.80)     |
| MF              | 8.15 (3.34)   | 4.00 (2.86)    | 2.56 (1.51)       | (-1.20-0.74)            | (-2.68-0.72)           | 1.38 (0.19-2.59)       | 2.13 (1.03-3.23)      |
| BAI             |               |                |                   |                         |                        |                        |                       |
| BA              | 10.76 (7.33)  | 8.21 (4.10)    | 6.43 (7.80)       | -0.56                   | -0.27                  | 0.43 (-1.64-2.51)      | 0.59 (-1.98-3.16)     |
| MF              | 9.08 (7.70)   | 5.91 (4.48)    | 4.67 (4.64)       | (-2.17-1.04)            | (-2.92-2.38)           | 0.51 (-1.95-2.98)      | 0.67 (-1.95-3.34)     |
| AAQ-II          |               |                |                   |                         |                        |                        |                       |
| BA              | 26.00 (6.85)  | 20.50 (7.34)   | 21.21 (9.54)      | -0.37                   | -0.87                  | 0.80 (-1.61-3.21)      | 0.61 (-2.17-3.39)     |
| MF              | 26.46 (8.21)  | 17.52 (9.54)   | 14.00 (7.07)      | (-3.52-2.78)            | (-4.26-2.52)           | 1.06 (-2.33-4.44)      | 1.68 (-1.42-4.78)     |
| QoLI            |               |                |                   |                         |                        |                        |                       |
| BA              | -0.37 (1.52)  | 1.14 (1.83)    | 0.97 (2.15)       | -0.38                   | -0.93                  | 0.94 (0.37-1.50)       | 0.76 (0.13-1.38)      |
| MF              | 0.89 (1.61)   | 1.87 (2.24)    | 2.87 (2.10)       | (-0.38-1.14)            | (-1.77-0.10)           | 0.53 (-0.20-1.27)      | 1.14 (0.41-1.87)      |

Abbreviations: BA: Behavioral activation; MF: Mindfulness; H-L Dep: High-level depression; L-L Dep: Low-level depression; BDI-II: Beck Depression Inventory-II; PHQ-9: 9-item Patient Health Questionnaire Depression Scale; BAI: Beck Anxiety Inventory; AAQ-II: Acceptance and Action Questionnaire; QOLI: Quality of Life Inventory.

## Behavioral activation vs. Mindfulness-based guided self-help treatment administered through a smartphone application: a randomized controlled trial

Kien Hoa Ly<sup>§</sup>, Anna Trüschel<sup>1</sup>, Linnea Jarl<sup>1</sup>, Susanna Magnusson<sup>1</sup>, Tove Windahl<sup>1</sup>, Robert Johansson<sup>1</sup>, Per Carlbring<sup>2</sup>, Gerhard Andersson<sup>1,3</sup>

<sup>1</sup> Department of Behavioural Sciences and Learning, Linköping University, Linköping, Sweden

<sup>2</sup> Department of Psychology, Stockholm University, Stockholm, Sweden

<sup>3</sup> Department of Clinical Neuroscience, Center for Psychiatry Research, Karolinska Institutet, Stockholm, Sweden

<sup>§</sup> Corresponding author

Email addresses:

KHL: kien.hoa.ly@liu.se

AT: annr005@student.liu.se

LJ: linja498@student.liu.se

SM: susma302@student.liu.se

TW: tovwi961@student.liu.se

RJ: robert.johansson@liu.se

PC: per@carlbring.se

GA: gerhard.andersson@liu.se

### Article Summary

#### 1) Article Focus

• It is well established that guided self-help interventions, administered through internet, can have positive effects on symptoms of depression. There ~~are, however, to our knowledge no controlled trials~~ are, however, to our knowledge no controlled trials on smartphone-delivered behavioral activation, neither on mindfulness.

• Both behavioral activation and mindfulness are components in multi-component treatment packages, and as such they might be easier to target in smartphone applications than an entire treatment program would be, due to the need of simple and fast interaction with the treatment

1  
2  
3  
4  
5  
6  
7  
8  
9  
10  
11  
12  
13  
14  
15  
16  
17  
18  
19  
20  
21  
22  
23  
24  
25  
26  
27  
28  
29  
30  
31  
32  
33  
34  
35  
36  
37  
38  
39  
40  
41  
42  
43  
44  
45  
46  
47  
48  
49  
50  
51  
52  
53  
54  
55  
56  
57  
58  
59  
60

program.

- The aim of this study was to test the effects of two smartphone-delivered treatments; one based on behavioral activation and the other on mindfulness. We expected that behavioral activation would be superior to mindfulness for participants suffering from more severe depression.

## 2) Key Messages

- This ~~The large within-group effect sizes are comparable to other depression treatment and indicate that this~~ smartphone format might work well for a depressed population.
- Behavioral activation might work better for a more severely depressed population, whereas mindfulness might work better for people suffering from light depression, at least in this smartphone format.
- Since smartphones likely will be integrated even further in society, they may be important in the future of making depression treatment and other psychological treatment more assimilated into people's daily life.

## 3) Strengths and Limitations.

- One of the first to do a randomized controlled trial using smartphone applications.
- Did not control for the different components separately, so we cannot determine which parts of the treatments were effective.

## Keywords

Depression, Behavioral activation, Smartphone application, Mindfulness.

## Abstract

### Objectives

Evaluating the effectiveness of two smartphone-delivered treatments; one based on behavioral activation and the other on mindfulness.

### Design

Parallel randomized controlled, open, trial. Participants were allocated using an online randomization tool (~~www.random.org~~), handled by an independent person who was separate from the staff conducting the study.

### Setting

~~Open trial at a university psychological center in Sweden.~~ General community, with recruitment nationally through mass media and advertisements.

## Participants

40 participants diagnosed with major depressive disorder received a behavioral activation treatment, and 41 participants received a mindfulness treatment

9 participants were lost ~~to~~at the post-treatment.

## Intervention

Behavioral activation: An 8 week long behavior program administered via a smartphone application. Mindfulness: An 8 week long mindfulness program, administered via a smartphone application. □

## Main outcome measures

The primary outcome measures were the Beck Depression Inventory-II (BDI-II) and the 9-item Patient Health Questionnaire Depression Scale (PHQ-9). □

## Results

81 participants (BA n=40; Mindfulness n=41) were randomized (mean age 36.0 years (SD=10.8)) ~~and~~ -All were included in the intention to treat analysis analyzed. Results showed large within-group effect sizes on the BDI-II for the behavioral activation treatment and mindfulness treatment respectively from pre-treatment to the 6-month follow up ( $d=1.19$  and  $d=1.09$ ), but no significant interaction effects of group and time on any of the outcome measures from pre-treatment to the 6-month follow up. Subgroup analyses showed that the behavioral activation treatment was more effective than the mindfulness treatment among participants with higher initial severity of depression, measured with the PHQ-9. In contrast, the mindfulness treatment worked better than the behavioral activation treatment among participants with lower initial severity. Within group effects from pre measurement to post measurement on BDI-II were  $d=1.83$  CI [0.27 3.38] and  $d=1.21$  CI [-0.95 3.38] for the behavioral activation treatment and mindfulness treatment respectively. From pre measurement to 6 month follow up, effects were  $d=1.19$  CI [-0.87 3.24] and  $d=1.09$  CI [-1.32 3.50] respectively.

## Conclusions

For participants with higher severity of depression, the treatment based on behavioral activation was superior to the treatment based on mindfulness. For participants with lower initial severity, the treatment based on mindfulness worked significantly better than the treatment based on behavioral activation.

The large within group effects on the primary outcome measures, as well as the large recovery rates for both groups, indicate that this smartphone format works well for a depressed population.

## Trial registration

Clinical Trials NCT01463020.

1  
2  
3  
4  
5  
6  
7  
8  
9  
10  
11  
12  
13  
14  
15  
16  
17  
18  
19  
20  
21  
22  
23  
24  
25  
26  
27  
28  
29  
30  
31  
32  
33  
34  
35  
36  
37  
38  
39  
40  
41  
42  
43  
44  
45  
46  
47  
48  
49  
50  
51  
52  
53  
54  
55  
56  
57  
58  
59  
60

**Funding**

The Swedish Research Council, 2011-2476

For peer review only

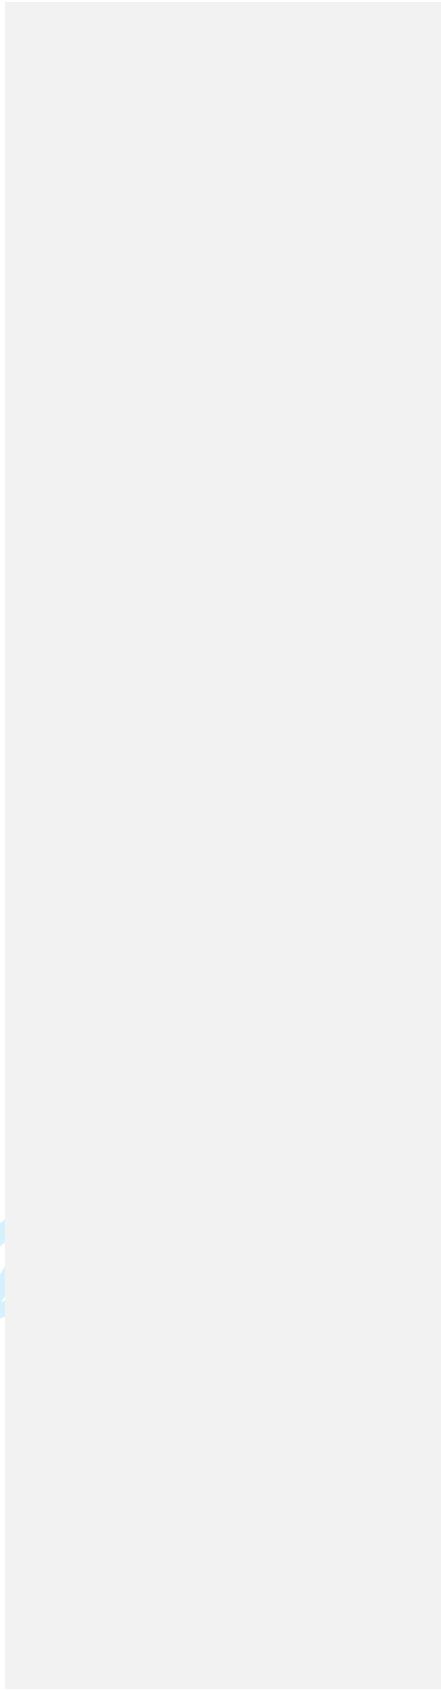

## Background

Major depressive disorder (MDD) is a major health problem, which lowers the quality of life for the individual and generates enormous costs for society<sup>1,2</sup>. Several forms of psychotherapy have been found to be effective in the treatment of MDD<sup>3</sup>. For example, behavioral activation has an established empirical base<sup>4</sup>. The efficacy of behavioral activation for treating MDD has been established in a number of studies over the past four decades<sup>5</sup>. Moreover, a dismantling study showed that behavioral activation could be as effective as the full cognitive behavior therapy (CBT) treatment package<sup>6</sup>. In addition, a series of reviews and meta-analyses also show that behavioral activation is at least as effective as the full CBT packages that include both cognitive and behavioral components<sup>4</sup>. In a later study, behavioral activation was found to be as effective as antidepressant medication<sup>7</sup>.

It is also well established that guided self-help interventions, administered through internet, can have positive effects on symptoms of depression<sup>8-10</sup>. An increasing number of studies show that this treatment format can be as effective as face-to-face treatment for mild to moderate MDD and anxiety disorders<sup>9</sup>. Guided treatments distributed digitally have provided a way to reach out to more patients in a manner that in most cases requires less therapist time than face-to-face psychotherapy<sup>11</sup>. There are, however, to our knowledge no controlled trial on internet-delivered pure behavioral activation, and no study using smartphones for the delivery of behavioral activation, even if studies are being conducted on smartphone-administered CBT<sup>12</sup>.

An important feature of mobile technology is the possibility for the therapist to reach the patient outside of the therapy room or when not sitting in front of the computer, and thus create direct incentives for behavior change in the patient's everyday life<sup>13</sup>. Therefore, behavioral activation is a treatment that could benefit from the use of new mobile technologies (for example smartphones) by creating direct incentives for behavioral activation in patient's everyday life.

The same applies for mindfulness. Mindfulness is often a component in the so called third wave of CBT, such as mindfulness-based cognitive therapy (MBCT;<sup>14</sup>), dialectical behavior therapy (DBT;<sup>15</sup>), and acceptance and commitment therapy (ACT;<sup>16</sup>). Studies have shown a significant negative correlation between mindfulness and depression<sup>17,18</sup>. Moreover, a meta-analysis based on 39 studies of mindfulness for depression and anxiety showed a moderate effect size of Hedges's  $g=0.59$  for improving mood symptoms<sup>19</sup>. The analysis also showed that mindfulness was effective for individuals with depression as both the primary diagnosis and the secondary. Moreover, mindfulness has been shown to be effective in relapse prevention in depression<sup>20</sup>. Within digitally distributed treatments, mindfulness has appeared as a component in CBT-based internet treatments, but there have so far been few studies on mindfulness as a stand-alone, digitally distributed treatment for depression<sup>21</sup>.

The advantages as well as the challenges of using mobile phones in CBT have been summarized by Boschen and Casey<sup>13</sup>. One challenge with using the mobile phone as a platform for psychological treatment is that the user must be able to interact with the program in an easy way<sup>13</sup>. Both behavioral activation and mindfulness are components in multi-component treatment

1  
2  
3  
4  
5  
6  
7  
8  
9 packages, and as such they might be easier to target in smartphone applications than an entire  
10 treatment program would be, due to the need of simple and fast interaction with the treatment  
11 program.

12  
13 At the same time, research suggests that depression severity is known to be a significant  
14 moderating factor in the treatment of depression. For example, some initial evidence suggests  
15 that there is a difference in efficacy between two different forms of CBT in the treatment of the  
16 more severely depressed patients<sup>7,22</sup>. There are also indications that the difference between  
17 antidepressant medication and placebo is evident in severe depression, but not in mild to  
18 moderate depression<sup>23</sup>, and that combined treatments with medication and psychotherapy are  
19 more effective than single treatments<sup>22</sup>. These results suggest that baseline depression severity  
20 may moderate the response to different variants of treatments. Thus, it is concluded that different  
21 treatments distributed digitally can target different subgroups of depression, in terms of severity.  
22 For example, Dimidjian et al. (2006) found that among more severely depressed patients,  
23 behavioral activation was comparable to antidepressant medication, and significantly  
24 outperformed cognitive therapy, whereas for the less severely depressed patients, no differential  
25 treatment effects were observed.

26  
27 The aim of this study was to test the effects of two smartphone-delivered treatments; one based  
28 on behavioral activation and the other on mindfulness. Hence, the main question is whether  
29 behavioral activation is more effective than mindfulness delivered over smartphone. The study  
30 was based on our previous work on guided internet-treatment for depression<sup>24</sup>, but in the current  
31 study the treatment content was delivered entirely via the participants personal smartphone,  
32 using recently developed smartphone applications. We expected, in line with Dimidjian and  
33 coworkers' conclusions (BA relative to CT  $d=0.87$  on BDI), that behavioral activation would be  
34 superior to mindfulness for participants suffering from more severe depression with an expected  
35 between group effect size of Cohen's  $d=0.50$ ). In order to evaluate long-term effects, we also  
36 included a 6-month follow-up after the start of the treatment.

## 37 38 **Methods**

### 39 **Ethics statement**

40  
41 The study was approved by the Regional Ethics Board of Linköping, Sweden. Written informed  
42 consent was obtained from all participants by surface mail.

### 43 44 **Recruitment and selection**

45  
46 The participants were mainly recruited via mass media and advertisements in large Swedish  
47 newspapers. Those who were interested were directed to a web page with information about the  
48 study, the treatments being tested and how to participate in the study.

49  
50 Inclusion criteria for the study were a) being at least 18 years old, b) having a point total of  $\geq 5$  on  
51 PHQ-9, c) reported unchanged dosage of medication for depression and anxiety during the last  
52 month, d) not being in any concurrent psychological treatment, e) not suffering from a severe  
53  
54  
55  
56  
57  
58  
59  
60



comorbid psychiatric condition that could interfere with the treatment (e.g. bipolar disorder or schizophrenia, assessed during a clinical interview), f) not having other primary medical problems which would need other treatments first hand, g) not having severe alcohol problems, h) no assessed risk of being suicidal (see below for details) and i) major depression according to the DSM-IV, with at least an episode in partial remission. The diagnosis of MDD was confirmed by a structured interview (see below). Additionally, an assessment of suicidal ideation was conducted. The interviews were made over telephone by four MSc clinical psychology students. The principal research executive reviewed all the protocols from the interviews together with the interviewers. Questions regarding medication and psychiatric history that came up in the interview were considered before the decision on inclusion was made.

Of the 231 individuals who initially expressed interest in the study, 126 completed all the questions in the online screening (22 did not finish the screening and 83 did not begin the screening). Of these, 29 were excluded before the diagnostic interview telephone interview started. 13 individuals were excluded after the diagnostic interview telephone interview. Eighty-four were subsequently included after the interview had been conducted. Before the study started, three participants chose not to participate in the study. The reasons for exclusion are specified in the flowchart found in Figure 1.

Among the randomized participants there were 70.3 % women ( $n=57$ ) and 29.6 % men ( $n=24$ ). The mean age was 36.0 years ( $SD=10.8$ ) ranging from 20 to 61 years. See Table 1 for additional demographical data. There were no significant differences in demographic characteristics between the groups according to chi-square analysis.

### Outcome measures

**Primary outcome measures.** The primary outcome measures were the Beck Depression Inventory-II (BDI-II; <sup>25</sup>) and the 9-item Patient Health Questionnaire Depression Scale (PHQ-9; <sup>26,27</sup>) that were administered pre-treatment, at post-treatment and also six months after the treatment had ended. The PHQ-9 was also administered on a weekly basis during the entire treatment phase (8 weeks). Hence, there were three measurements on the outcome BDI-II and 10 measurements on the outcome PHQ-9.

**Secondary outcome measures.** In addition to the BDI-II and PHQ-9, the Beck Anxiety Inventory (BAI; <sup>28</sup>), the Quality of Life Inventory (QOLI; <sup>29,30</sup>), the Trimbos and Institute of Medical Technology Assessment Cost Questionnaire for Psychiatry (TIC-P; <sup>31,34</sup>) and the Acceptance and Action Questionnaire (AAQ-II; <sup>32</sup>) were administered. The AAQ-II was administered on a weekly basis during the entire treatment phase (8 weeks). All other outcome measures were collected at pre-treatment, post-treatment and at 6-month after the start of the treatment, except for the TIC-P that was collected at pre-treatment and at 6-month after the treatment started. Hence, there were two measurements on the outcome TIC-P, three measurements on the outcomes BAI and QOLI and 10 measurements on the outcome AAQ-II.

**Clinician-administered measures.** Psychiatric diagnoses were assessed at pre-treatment, post-

1  
2  
3  
4  
5  
6  
7  
8  
9  
10  
11  
12  
13  
14  
15  
16  
17  
18  
19  
20  
21  
22  
23  
24  
25  
26  
27  
28  
29  
30  
31  
32  
33  
34  
35  
36  
37  
38  
39  
40  
41  
42  
43  
44  
45  
46  
47  
48  
49  
50  
51  
52  
53  
54  
55  
56  
57  
58  
59  
60

treatment and at 6-month after the start of the treatment, using the Mini-International Neuropsychiatric Interview (M.I.N.I.;<sup>33</sup>). The M.I.N.I. is a diagnostic interview that, in contrast to several other diagnostic interviews, is completely structured, making it appropriate for other assessors than experienced psychiatrists<sup>33</sup>. All interviews were conducted by the four psychology students described above, who at post-treatment were blind to participant's condition. At the 6-month follow-up, the interviews were conducted by other clinical psychology students who were blind to both the participant's condition and the treatment they had been given. Recovery rates were defined as no longer fulfilling the criteria for depression according to M.I.N.I.

Treatment credibility. To measure treatment credibility, Borkovec and Nau's Credibility/expectancy scale (C-Scale)<sup>34</sup> was used. The C-scale measures the way in which participants view the logic of the treatment (credibility) and the improvements that can be achieved (expectancy) and includes five items on a 10-point scale. Assessment was made after the first week of treatment.

~~Credibility. The credibility of the two treatments showed a mean score of 31.9 (SD=7.1) for the behavioral activation group and at 32.1 (SD=7.8) for the mindfulness group on the Borkovec and Nau's C-Scale<sup>34</sup>.~~

### Procedure and design

For those participants included in the study, the results from the online screening were used as pre-treatment assessment. All measures used have been shown to have good psychometric properties, with internal consistencies of at least  $\alpha=.79$ . Details of this can be found in the respective references of the outcome questionnaires. The outcome measures used have established good psychometric properties, also when administered via the internet<sup>35 36</sup>.

After the recruitment, participants were allocated using an online randomization tool ([www.random.org](http://www.random.org)), handled by an independent person who was separate from the staff conducting the study.

### The interventions

**Behavioral activation treatment.** An 8-week smartphone-based behavioral activation intervention with minimal therapist contact was developed by our research group. The intervention consisted of a short web-based psychoeducation, and a step-by-step behavior program administered via a smartphone application. The psychoeducation aimed to introduce the participants to the treatment, touching on topics like the prevalence of depression, its etiology and maintenance factors based on operant conditioning, as well as the theoretical basis for behavioral activation. The text was written specially for the current intervention, but inspired by Martell et al.<sup>37</sup> and Lejuez, Hopko & Hopko<sup>38</sup>. In all, there were three chapters, totaling 11 pages of text, containing 3 893 words.

1  
2  
3  
4  
5  
6  
7  
8  
9 The smartphone application was built as a native application for Iphone and a mobile web  
10 application for other smartphones. See Figure 2 for a screenshot of the application. A prototype  
11 of the smartphone application was tested in a pilot study<sup>39</sup>. This prototype, however, was not  
12 specifically designed for depression interventions. The purpose of the behavioral activation  
13 application was to make it easy for the participant to remember and register important behaviors,  
14 in order to increase everyday activation. The application contained a database of 54 behaviors,  
15 divided into three different areas for the participant to add to their application. See Table 2 for  
16 the list of behaviors from the database. The database aimed to provide suggestions, help, and  
17 inspiration to get started with the application. Participants were also able to add their own areas  
18 and behaviors into the application to start tracking. Through the initial psychoeducation, the  
19 participants were guided to add few (between two and four) and easy behaviors from start,  
20 mainly from the database.

21  
22 When a behavior was completed, the participant could mark this in the application and add a  
23 short reflection. Statistics and summaries of quantitative (i.e. behavior frequency) and qualitative  
24 data (i.e. reflections) were presented in the application for the participant.

25  
26 There was also a back-end system where all the quantitative and qualitative data from the  
27 participants was accessible for the therapist. From the back-end system, the therapist could send  
28 short text messages to the participants via a messaging system, similar to Short Message Service  
29 (SMS). The messaging system was used by the therapists to send personal encouraging messages  
30 every other, or every third day to the participants, as well as weekly general educational  
31 messages. The system functioned as a one-way communication, which means that the  
32 participants were not able to reply the messages.

33  
34 Apart from this, the participants were told to write a reflection to summarize every week for their  
35 therapist and send it in via e-mail, in the end of every treatment week. The participants received  
36 personal feedback on their reflection from their therapist. No sensitive data was saved on a  
37 computer, in which the person providing data could be identified. In addition, all internet and  
38 smartphone activities was secured, with encrypted information.

39  
40 **Mindfulness treatment.** The mindfulness intervention, also an 8-week smartphone-based  
41 intervention with minimal therapist contact, consisted of a short web-based psychoeducation, and  
42 a step-by-step mindfulness practice program, administered via a smartphone application. The  
43 psychoeducation for the mindfulness intervention was equivalent to that of the behavioral  
44 activation intervention, except that the theoretical basis of mindfulness was presented instead of  
45 the theoretical basis of behavioral activation. The text was written specially for the current  
46 intervention, but inspired by [Williams et al.](#)<sup>40</sup>. In all, there were three chapters, totaling 9 pages  
47 of text, containing 2 927 words.

48  
49  
50 The smartphone application for Iphone was an established and commercially available  
51 application that could be downloaded from the Apple app store. See Figure 3 for a screenshot of  
52 the application. For other smartphones, a mobile web application was built especially for the  
53  
54  
55  
56  
57  
58  
59  
60

1  
2  
3  
4  
5  
6  
7  
8  
9  
10  
11  
12  
13  
14  
15  
16  
17  
18  
19  
20  
21  
22  
23  
24  
25  
26  
27  
28  
29  
30  
31  
32  
33  
34  
35  
36  
37  
38  
39  
40  
41  
42  
43  
44  
45  
46  
47  
48  
49  
50  
51  
52  
53  
54  
55  
56  
57  
58  
59  
60

current study with the aim of mimicking the Iphone application. The application consisted of a number of audio tracks with exercises to facilitate the practice of mindfulness. The exercises were both guided and unguided, and in short (three minutes) and long (30 minutes) format. Through the initial psychoeducation, the participants were guided to start with short mindfulness exercises.

Since the mindfulness application did not have a communication system such as the behavioral activation application, e-mails were used to emulate the messaging system in the behavioral activation application. Hence, the therapists sent encouraging messages every other, or every third day to the participants, as well as weekly general educational messages via mail. The difference in how the therapists communicated in the mindfulness intervention, compared with the behavioral activation intervention, was that the therapists could not give specific feedback on activities or exercises that the participants had done. Otherwise, the communication was similar (length and type of content).

Additionally, the participants given the mindfulness intervention were also told to write a reflection to summarize every week for their therapist and send it in via e-mail. The participants received personal feedback on their reflection from their therapist.

**Therapists.** The therapists were four final-semester students from a five-year M.Sc. clinical psychologist program. All therapists had completed their clinical training as well as 16 weeks of internship. Each therapist was responsible for the treatment of 8 to 10 participants from the behavioral activation group and an equal number of participants from the mindfulness group. Therapists were randomly allocated to participants, with the restriction of not having more than 10 participants from each group. For the entire duration of the study the therapists received continuous supervision from an experienced psychotherapist with CBT orientation, who had previous experience of working with a behavioral activation treatment manual.

### Subgroups based on cut-off scores

All randomized participants were classified into groups of either high or low severity of depression. These classes were formed based on the cut-offs scores on the PHQ-9. The participants were considered to suffer from higher severity of depression if they scored  $\geq 10$  on PHQ-9 and if they fulfilled the criteria for an ongoing primary diagnosis of major depression of moderate character ( $n=51$ ). Participants, not fulfilling these criteria were considered to suffer from lower severity of depression ( $n=30$ ).

### Data analysis

All analyses were performed using SPSS 20 (SPSS, Inc., Chicago, IL). Independent  $t$ -tests and  $\chi^2$ -tests were used to test for group differences in demographics, pre-treatment data and in recovery rates- clinical significant improvement. Differences between the behavioral activation treatment and the mindfulness treatment were primarily investigated by modeling interaction effects of group and time. In order to adhere to the intention-to-treat principle, the continuous

1  
2  
3  
4  
5  
6  
7  
8  
9 outcome variables (except from TIC-P, that was not analyzed as part of this study) were analyzed  
10 using mixed effects models, given their ability to handle missing data. For the PHQ-9, where  
11 weekly measures were available, the continuous outcome variable was analyzed using mixed  
12 effects models, given their ability to handle missing data<sup>41</sup>. Random intercept models were  
13 selected. All analyses used Maximum Likelihood estimation. Random intercept models were  
14 selected for all measures. Differences between the behavioral activation treatment and the  
15 mindfulness treatment were primarily investigated by modeling interaction effects of group and  
16 time. For the PHQ-9 and the AAQ-II, where weekly measures were available. Also, several  
17 models were compared using available information criteria, and the model with best fit was  
18 chosen. (The covariance between the random intercept and slope was not significant, and  
19 therefore was not included in the model. Error terms across time were modeled with a first-order  
20 autoregressive covariance structure with heterogeneous variances. Hence, a random intercept  
21 model was used also for these measures. Differences in average rates of growth between the two  
22 groups were examined by a fixed effects interaction between group and time. Between-group  
23 differences at post-treatment were analyzed using independent *t*-tests. Power analysis indicated  
24 an 89% chance of detecting a between-group effect size of  $d=0.60$  ( $\alpha$  level=0.05). Within- and  
25 between-group effect sizes (Cohen's *d*) were calculated by dividing the differences in means by  
26 the pooled standard deviations<sup>42</sup>. This was done both from pre-measurements to post-  
27 measurements, and from pre-measurements to the 6-month follow up data.

## Results

30 The two groups did not differ significantly on any of the measures at pretreatment ( $t=0.50$  to  
31  $0.67$ ,  $df=79$ ,  $p=0.78$  to  $0.50$ ). The results will be presented in the following order: attrition and  
32 adherence, self-report inventories (including effect size) both for the whole sample and the  
33 subgroups, recovery rates and treatment credibility.

### Attrition and adherence

36 Of the 84 participants randomized, three participants decided not to participate in the study. Nine  
37 out of these 81 participants (11.1 %) did not provide post-treatment data. Six out of these  
38 (totaling 7.4 %) were unreachable for the telephone interview and were classified as unimproved.  
39 In the 6-month follow-up, 69 participants from the two treatment groups (85.2 %) provided data  
40 on the self-report measures and 59 (72.8 %) were reached for the telephone interview. Once  
41 again, those unreachable were classified as unimproved.

44 Adherence to treatment was defined as the number of weekly reflections the participants sent to  
45 their therapist. In order to be considered as a completed week, at least one reflection had to have  
46 been sent to the therapist during that week. Of the 81 participants, 57 (70 %) succeeded to adhere  
47 to all the eight weeks. Of these, 25 (63 %) were in the behavioral activation group and 32 (78 %) were  
48 in the mindfulness group. In average, participants succeeded to adhere to six weeks ( $M=5.8$ ,  
49  $SD=2.47$ ).

### Primary outcome measure

No significant interaction effects of group and time on the PHQ-9 and the BDI-II were found between the groups, neither from pre-treatment to post-treatment (PHQ-9: ( $F(1, 501.47)=.28, p's=.60$ ); BDI-II: ( $F(1, 74.11)=.28, p's=.60$ )), nor from pre-treatment to the 6-month follow up (PHQ-9: ( $F(1, 571.49)=.36, p's=.55$ ); BDI-II: ( $F(1, 147.96)=.09, p's=.77$ )). However, as evident from Table 3, large within-group effect sizes were found on PHQ-9 and BDI-II, between pre-treatment and post-treatment, as well as between pre-treatment to the 6-month follow up. This was the case for both the behavioral activation treatment and the mindfulness-treatment.

### Subgroup analyses

For the participants suffering from high severity of depression ( $\geq 10$  on the PHQ-9 and an ongoing primary diagnosis of major depression of moderate character), a mixed-effects model analysis on the PHQ-9 revealed significant interaction effects of group and time in favor for the behavioral activation group. Thus, the results indicated a difference between the groups from pre-treatment to 6-month follow-up ( $F(1, 362.1)=5.2, p's<.05$ ). As seen in Table 3, the effect size between the groups at 6-month follow-up was small, but close to medium (Cohen's  $d=0.47$ ; CI [-1.46, 2.40]).

For the more mildly depressed participants there was a significant effect in favor of the mindfulness group from pre-treatment to 6-month follow-up on both the PHQ-9 ( $F(1, 69.3)=7.7, p's<.01$ ) and the BDI-II ( $F(1, 53.60)=6.25, p's<.05$ ). The effect sizes between the groups at 6-month follow-up were, as evident from Table 3, large (PHQ-9: Cohen's  $d=0.986$ ; CI [-0.72, 2.68]; BDI-II: Cohen's  $d=1.21$ ; CI [-1.71, 4.13]).

### Secondary outcome measure

As evident from Table 3 no significant interaction effects were found on the secondary measures neither from pre-treatment to post-treatment (BAI: ( $F(1, 74.05)=1.30, p's=.26$ ); AAQ-II: ( $F(1, 570.00)=.07, p's=.79$ ); QOLI: ( $F(1, 76.43)=1.06, p's=.31$ )), nor from pre-treatment to the 6-month follow up (BAI: ( $F(1, 147.01)=.35, p's=.56$ ); AAQ-II: ( $F(1, 639.00)=.11, p's=.74$ ); QOLI: ( $F(1, 148.61)=.39, p's=.53$ )). Nevertheless, as shown in table 3, medium to large within-group effect sizes were revealed on all secondary outcome measures. This was evident for both groups, and on pre-treatment to post-treatment, as well as on pre-treatment to the 6-month follow up.

### Recovery rates

There were no significant differences in recovery rates between the groups, neither at post-treatment nor at the 6-month follow-up. This was the case both when analyzing the whole sample as well as the subgroups. When analyzing the whole sample, 73.5 % ( $n=25$ ) in the behavioral activation group recovered after treatment, compared to 53.1 % ( $n=17$ ) in the mindfulness group ( $\chi^2(N=66, df=1)=2.97, p=.07+$ ). At the 6-month follow-up, 30 out of 34 participants (88.2 %) from the behavioral activation group had recovered, and 26 out of 32 participants (81.3 %) from the mindfulness group had recovered ( $\chi^2(N=66, df=1)=.63, p=.327$ ).

1  
2  
3  
4  
5  
6  
7  
8  
9 When analyzing only the severe depressed participants, there was a tendency in favor for the  
10 behavioral activation group. Among the severely depressed participants, 73.9 % ( $n=17$ ) in the  
11 behavioral activation group recovered after treatment, compared to 50.0 % ( $n=14$ ) in the  
12 mindfulness group ( $\chi^2(N=51, df=1)=3.03, p=.072$ ). At the 6-month follow-up, 21 out of 23  
13 participants (91.3 %) from the behavioral activation group had recovered, and 22 out of 28  
14 participants (78.6 %) from the mindfulness group had recovered ( $\chi^2(N=51, df=1)=1.55,$   
15  $p=.20197$ ).

### 16 17 **Treatment credibility and therapist time**

18 The credibility of the two treatments showed a mean score of 31.9 (SD=7.1) for the behavioral  
19 activation group and at 32.1 (SD=7.8) for the mindfulness group on the Borkovec and Nau c-  
20 Scale<sup>34</sup>.

21  
22  
23 An independent t-test showed no significant difference between the two groups on the C-scale ( $t$   
24 (78)=0.12,  $p=0.90$ ). Furthermore, the C-scale did not correlate significantly with any of the  
25 outcome measures, either for all participants combined ( $r=0.13, p=0.27$ ), for the behavioral  
26 activation group ( $r=0.01, p=0.92$ ) or for the mindfulness group ( $r = .23, p = .18$ ).

27  
28 The therapist time per participant and week varied depending on whether the participant had sent  
29 a reflection or not. The therapists reported a span between 2 and 18 minutes per week and  
30 participants. However, the therapist time did not differ between the two treatment groups.

## 31 32 33 **Discussion**

34  
35 The overall aim of this study was to investigate the effects of two smartphone-delivered  
36 treatments for people suffering from mild to moderate major depression; one based on behavioral  
37 activation and the other on mindfulness. Hence, the main question was whether behavioral  
38 activation is more effective than mindfulness delivered over smartphone. When analyzing the  
39 whole sample as one entity, the result showed that the two interventions ~~were effective for~~  
40 ~~treating depression with large within-group effect sizes and large recovery rates, but that they did~~  
41 not differ significantly from one another; neither from pre-treatment to post-treatment, nor from  
42 pre-treatment to the 6-month follow-up on any of the outcome measures. Also, there were no  
43 significant differences in recovery rates between the groups, neither at post-treatment nor at the  
44 6-month follow-up.

45  
46  
47 This study also explored how different levels of initial depression severity could moderate  
48 response to the different interventions. All randomized participants were classified into either  
49 high or low severity of depression based on the cut-offs scores on the PHQ-9 and if they fulfilled  
50 the criteria for an ongoing primary diagnosis of major depression. For participants with higher  
51 severity of depression, the treatment based on behavioral activation was superior to the treatment  
52 based on mindfulness, as measured with PHQ-9. In contrast, for participants with lower initial  
53  
54  
55  
56  
57  
58  
59  
60

1  
2  
3  
4  
5  
6  
7  
8  
9 severity, the treatment based on mindfulness worked better than the treatment based on  
10 behavioral activation, as measured with PHQ-9 and BDI-II.

11  
12 The result from the analysis of the higher severity participants is in line with earlier <sup>7</sup> findings.  
13 For example, Dimidjian et al (2006) showed that behavioral activation was comparable in  
14 efficacy to antidepressant medication, and more efficacious than cognitive therapy - but only  
15 among those patients who were more severely depressed. In line with this, Beck and colleagues  
16 <sup>43</sup> have long suggested that therapists should focus on behavioral strategies early in treatment  
17 when patients are more depressed and return to that emphasis later if patients start to worsen.

18  
19 The result from the analysis of the less severely depressed participants was unexpected to us.  
20 Although there is yet only initial evidence that mindfulness treatment is effective for acute or  
21 severely depressed <sup>44 45</sup>, mindfulness has proven to be effective for relapse prevention of  
22 depression <sup>20 46 47</sup>. That gives implications that a mindfulness-based treatment administered  
23 through smartphone will work better for people suffering from mild depression. However, the  
24 fact that the mindfulness-based treatment worked significantly better than the behavioral  
25 activation-treatment was surprising to us. One explanation could be that the less severely  
26 depressed participants suffered more from stress and anxiety rather than depression. This  
27 population would then not be in need of a treatment that encourages more activation. Instead, a  
28 mindfulness treatment could work very well for this kind of problems <sup>19 48</sup>.

29 Moreover, the results showed that the two interventions were effective for treating depression  
30 with large within-group effect sizes and large recovery rates, which are comparable to other  
31 depression treatment. This indicates that this smartphone format might work well for a depressed  
32 population.

### 33 34 **Limitations**

35  
36 There are a number of limitations that need to be mentioned. The first ~~and is that it is impossible~~  
37 ~~to determine which parts of the treatments were effective. Since we did not control for the~~  
38 ~~different components separately, we cannot, for example, rule out that the result was mainly an~~  
39 ~~effect of the therapist support. An additional treatment arm with only therapist support would~~  
40 ~~make it possible to rule out this question. no wait list group was included. However, our main~~  
41 ~~research question was to assess whether behavioral activation is more effective than mindfulness~~  
42 ~~delivered over smartphone. Hence, we wanted to isolate all other components, such as the~~  
43 ~~therapist support and the psychoeducation, and only investigate the two smartphone applications.~~

44 A second limitation is that the study was underpowered. Thus, it is difficult to detect significant  
45 overall differences between the two smartphone-treatments, even if significant interaction effects  
46 were found when using mixed effects models with PHQ-9 in the subgroup analyses. A post-hoc  
47 power analysis revealed that a sample of 393 participants was required to detect small between-  
48 group effects. We were not expecting that the mindfulness treatment would be as effective and  
49 powered the trial as if a moderate between-group effect would be found.

50 A third limitation was that the participants were recruited nationally through mass media and  
51 advertisements. Thus, we cannot be sure that this treatment would work in a clinical setting, e.g.  
52 an outpatient psychiatric facility. However, mean depression severity as measured by the BDI-II  
53  
54  
55  
56  
57  
58  
59  
60



at intake ( $M=24.10$ ) is rather close to the limit of 29 proposed for defining severe depression <sup>25</sup>.

Fourth, we recruited a broad range of participants, with regards to the severity of depression (a minimum of 8 and a maximum of 44 on BDI-II at intake). This makes it difficult to target a specific group for whom the treatments would be effective. Nevertheless, a subgroup analysis showed that participants with higher severity of depression responded to the behavioral activation significantly better than the treatment based on mindfulness, whereas the treatment based on mindfulness worked significantly better than the treatment based on behavioral activation for the participants with lower initial. Additionally, it can be argued that these broad inclusion criteria reflect a real population of individuals with depressive disorders.

A fifth related concern was the large number of participants who had college- or university level education (65.5 %). This might bias generalizability of the results, since it is possible that guided self-help is especially well suited for educated clients. However, there are data indicating that 50 % of patients seeking psychotherapy have some college education <sup>49</sup> and that educated patients may be more inclined to seek help for mental health problems <sup>50</sup>.

### **Conclusion**

Some clinical implications of this study are discussed as follows. Due to the need for simple and fast interaction with the treatment program, singular treatment components such as behavioral activation and mindfulness might be a better target for smartphone applications than entire multi-component treatment packages. At the same time, there is a need for guided self-help treatments distributed digitally that can reach out to more patients. This study is one of the first to test a treatment for depression, administered via smartphone. The large within-group effects on the primary outcome measures, as well as the large recovery rates for both groups **are comparable to other depression treatments, and** indicate that this smartphone format with a small amount of text and minimal therapist support, **might works** well for a depressed population.

Moreover, this study also shows that behavioral activation might work better for a more severely depressed population, whereas mindfulness might work better for people suffering from light depression. These results strengthen the hypothesis that different treatments distributed digitally can target different subgroups of depression, in terms of severity.

From a broader perspective, we believe that smartphones will be integrated even further in society since they are already socially accepted as well as relatively cheap for the functionalities you get <sup>13</sup>, and therefore may serve an important role in health care. Therefore these results, showing that mild to moderate depression can be treated effectively by means of a supported smartphone-application, might be important in the future of making depression treatment and other psychological treatment more assimilated into people's daily life. As suggested in Ly et al. (2012), the smartphone format might also help increasing the awareness of being in treatment in everyday settings, and therefore better help clients create direct incentives for treatment related activities in their everyday life <sup>39</sup>. Using smartphones to distribute psychological treatment might also help making it possible to reach out with psychological therapy to a broader group of people, since their use attracts no attention <sup>13</sup>, allowing users to interact with a device without fear of judgment or stigma. Lastly, psychological treatments distributed via smartphones are not

1  
2  
3  
4  
5  
6  
7  
8  
9  
10  
11  
12  
13  
14  
15  
16  
17  
18  
19  
20  
21  
22  
23  
24  
25  
26  
27  
28  
29  
30  
31  
32  
33  
34  
35  
36  
37  
38  
39  
40  
41  
42  
43  
44  
45  
46  
47  
48  
49  
50  
51  
52  
53  
54  
55  
56  
57  
58  
59  
60

only relevant for Swedish conditions but also for the developing countries in the world, which increasingly are empowered by mobile phones with internet connection.

This study might open up for a broad range of other trials conducted via smartphones, both for self-help interventions as well as adjunct tools in face-to-face treatments. We believe that a substantial part of internet-based interventions in the future will be executed through smartphones or at least supported by smartphones. Further studies should focus on both formats, as well as expanding the treatment platform to other psychological disorders.

For peer review only

## Trial registration

Clinical Trials NCT01463020

## Competing interests

A related version of the behavioral activation application is currently developed for the open market by KHL.

## Author's contributions

KHL was the project manager and has developed the application. KHL also participated in the drafting of the treatment manuals, and participated in analysis and interpretation of data. GA participated in the conception of the study and its design. GA also participated in the drafting of treatment manuals, analysis and interpretation of data, and performed statistical analysis. PC participated in the conception of the study and its design. RJ participated in analysis and interpretation of data, and performed statistical analysis. AT, LJ, SM and TW participated in the drafting of treatment manuals and performed the treatments. KHL and GA drafted the current manuscript. PC and RJ participated in revision of the current manuscript. All authors read and approved the final manuscript.

## Trial protocol

The full trial protocol can be found at: <http://www.trialsjournal.com/content/13/1/62>

## Funding

The Swedish Research Council sponsored this study with funding. 2011-2476

## References

1. Ebmeier K, Donaghey C, Steele J. Recent developments and current controversies in depression. *Lancet* 2006;367:153 - 67.
2. Smit F, Cuijpers P, Oostenbrink J, Batelaan N, de Graaf R, Beekman A. Costs of nine common mental disorders: implications for curative and preventive psychiatry. *J Ment Health Policy Econ* 2006;9:193 - 200.
3. Cuijpers P, van Straten A, Andersson G, van Oppen P. Psychotherapy for depression in adults: a meta-analysis of comparative outcome studies. *J Consult Clin Psychol* 2008;76(6):909-22.
4. Cuijpers P, van Straten A, Warmerdam L. Behavioral activation treatments of depression: a meta-analysis. *Clin Psychol Rev* 2007;27:318 - 26.
5. Dimidjian S, Barrera M, Martell C, Munoz R, Lewinsohn P. The origins and current status of behavioral activation treatments for depression. *Annu Rev Clin Psychol* 2011;7:1 - 38.
6. Jacobson N, Dobson K, Truax P, Addis M, Koerner K, Gollan J, et al. A component analysis of cognitive-behavioral treatment for depression. *J Consult Clin Psychol* 1996;64:295 - 304.
7. Dimidjian S, Hollon SD, Dobson KS, Schmalings KB, Kohlenberg RJ, Addis ME, et al. Randomized trial of behavioral activation, cognitive therapy, and antidepressant medication in the acute treatment of adults with major depression. *J Consult Clin Psychol* 2006;74(4):658-70.
8. Andrews G, Cuijpers P, Craske MG, McEvoy P, Titov N. Computer Therapy for the Anxiety and Depressive Disorders Is Effective, Acceptable and Practical Health Care: A Meta-Analysis. *PLoS ONE* 2010;5(10):e13196.
9. Cuijpers P, Donker T, van Straten A, Li J, Andersson G. Is guided self-help as effective as face-to-face psychotherapy for depression and anxiety disorders? A systematic review and meta-analysis of comparative outcome studies. *Psychol Med* 2010;40(12):1943-57.
10. Carlbring P, Hagglund M, Luthstrom A, Dahlin M, Kadowaki A, Vernmark K, et al. Internet-based behavioral activation and acceptance-based treatment for depression: A randomized controlled trial. *Journal of affective disorders* 2013;148(2-3):331-7.
11. Andersson G. Using the Internet to provide cognitive behaviour therapy. *Behav Res Ther* 2009;47(3):175-80.
12. Watts S, Mackenzie A, Thomas C, Griskaitis A, Mewton L, Williams A, et al. CBT for depression: a pilot RCT comparing mobile phone vs. computer. *BMC psychiatry* 2013;13:49.
13. Boschchen M, Casey L. The use of mobile telephones as adjuncts to cognitive behavioral psychotherapy. *Prof Psychol-Res Pr* 2008;39:546 - 52.
14. Segal ZV, Williams JMG. *Mindfulness-based cognitive therapy for depression*: Guilford Press, 2012.
15. Linehan M. *Cognitive-behavioral treatment of borderline personality disorder*: The Guilford Press, 1993.
16. Hayes SC, Strosahl KD, Wilson KG. *Acceptance and commitment therapy: An experiential approach to behavior change*: Guilford Press New York, 2003.
17. Cash M, Whittingham K. What facets of mindfulness contribute to psychological well-being and depressive, anxious, and stress-related symptomatology? *Mindfulness* 2010;1(3):177-82.
18. Brown KW, Ryan RM. The benefits of being present: mindfulness and its role in psychological well-being. *J Pers Soc Psychol* 2003;84(4):822-48.
19. Hofmann SG, Sawyer AT, Witt AA, Oh D. The effect of mindfulness-based therapy on anxiety and depression: A meta-analytic review. *J Consult Clin Psychol* 2010;78(2):169-83.
20. Piet J, Hougaard E. The effect of mindfulness-based cognitive therapy for prevention of relapse in recurrent major depressive disorder: a systematic review and meta-analysis. *Clinical psychology review* 2011;31(6):1032-40.

- 1  
2  
3  
4  
5  
6  
7  
8  
9  
10  
11  
12  
13  
14  
15  
16  
17  
18  
19  
20  
21  
22  
23  
24  
25  
26  
27  
28  
29  
30  
31  
32  
33  
34  
35  
36  
37  
38  
39  
40  
41  
42  
43  
44  
45  
46  
47  
48  
49  
50  
51  
52  
53  
54  
55  
56  
57  
58  
59  
60
21. Ljotsson B, Hedman E, Lindfors P, Hursti T, Lindefors N, Andersson G, et al. Long-term follow-up of internet-delivered exposure and mindfulness based treatment for irritable bowel syndrome. *Behav Res Ther* 2011;49(1):58-61.
  22. Cuijpers P, Andersson G, Donker T, van Straten A. Psychological treatment of depression: results of a series of meta-analyses. *Nord J Psychiatry* 2011;65(6):354-64.
  23. Fournier JC, DeRubeis RJ, Hollon SD, Dimidjian S, Amsterdam JD, Shelton RC, et al. Antidepressant drug effects and depression severity: a patient-level meta-analysis. *JAMA* 2010;303(1):47-53.
  24. Andersson G, Bergstrom J, Hollandare F, Carlbring P, Kaldø V, Ekselius L. Internet-based self-help for depression: randomised controlled trial. *The British journal of psychiatry : the journal of mental science* 2005;187:456-61.
  25. Beck AT, Steer RA, Brown BK. *Beck Depression Inventory manual*, 1996.
  26. Titov N, Dear BF, McMillan D, Anderson T, Zou J, Sunderland M. Psychometric Comparison of the PHQ-9 and BDI-II for Measuring Response during Treatment of Depression. *Cognitive Behaviour Therapy* 2011;40(2):126-36.
  27. Kroenke K, Spitzer R, Williams J. The PHQ-9: validity of a brief depression severity measure. *J Gen Intern Med* 2001;16:606 - 13.
  28. Beck A, Epstein N, Brown G, Steer R. An inventory for measuring clinical anxiety: psychometric properties. *J Consult Clin Psych* 1988;56:893 - 97.
  29. Lindner PA, G.; Öst, L.-G.; Carlbring, P. Validation of the Internet-administered Quality of Life Inventory (QOLI) in different psychiatric conditions. *Cognitive Behaviour Therapy* in press.
  30. Frisch M, Cornell J, Villanueva M. Clinical validation of the Quality of life inventory: a measure of life satisfaction for use in treatment planning and outcome assessment. *Psychol Assessment* 1992;4:92 - 101.
  31. Hakkaart-van Roijen L, Straten Av, Tiemens B, Donker M. Handleiding Trimbos/iMTA questionnaire for Costs associated with Psychiatric illness (TiC-P): Institute of Medical Technology Assessment (iMTA), 2002.
  32. Hayes S, Strosahl B, Bunting K, Twohig M, Wilson K. What is Acceptance and Commitment Therapy? *A Practical Guide to Acceptance and Commitment Therapy* 2004:1 - 30.
  33. Sheehan DV, Lecrubier Y, Sheehan KH, Amorim J, Janavs J, Weiller E, et al. The Mini-International Neuropsychiatric Interview (M.I.N.I.): the development and validation of a structured diagnostic psychiatric interview for DSM-IV and ICD-10. *J Clin Psychiatry* 1998;59 Suppl 20:22-33;quiz 34-57.
  34. Borkovec TD, Nau SD. Credibility of analogue therapy rationales. *Journal of Behavior Therapy and Experimental Psychiatry* 1972;3(4):257-60.
  35. Carlbring P, Brunt S, Bohman S, Austin D, Richards J, Vñst LG, et al. *Computers in Human Behaviour* 2007;23(null):1421.
  36. Hollandare F, Andersson G, Engstrom I. A comparison of psychometric properties between internet and paper versions of two depression instruments (BDI-II and MADRS-S) administered to clinic patients. *J Med Internet Res* 2010;12(5):e49.
  37. Martell CR, Addis ME, Jacobson NS. *Depression in context: Strategies for guided action*: WW Norton & Co, 2001.
  38. Lejuez CW, Hopko DR, Hopko SD. A brief behavioral activation treatment for depression treatment manual. *Behavior Modification* 2001;25(2):255-86.
  39. Ly K, Dahl J, Carlbring P, Andersson G. Development and initial evaluation of a smartphone application based on acceptance and commitment therapy. *SpringerPlus* 2012;1(1):11.
  40. Williams JMG, Teasdale JD, Segal ZV. *The mindful way through depression: Freeing yourself from chronic unhappiness*: The Guilford Press, 2007.

Formatted: Font: +Headings (Calibri)

Formatted: Font: +Headings (Calibri), 11 pt

Formatted: Font: +Headings (Calibri)

1  
2  
3  
4  
5  
6  
7  
8  
9  
10  
11  
12  
13  
14  
15  
16  
17  
18  
19  
20  
21  
22  
23  
24  
25  
26  
27  
28  
29  
30  
31  
32  
33  
34  
35  
36  
37  
38  
39  
40  
41  
42  
43  
44  
45  
46  
47  
48  
49  
50  
51  
52  
53  
54  
55  
56  
57  
58  
59  
60

41. Gueorguieva R, Krystal JH. Move over ANOVA: progress in analyzing repeated-measures data and its reflection in papers published in the Archives of General Psychiatry. *Arch Gen Psychiatry* 2004;61(3):310-7.
42. Borenstein M, Hedges LV, Higgins JP, Rothstein HR. *Introduction to meta-analysis*: Wiley, 2011.
43. Beck AT. *Cognitive therapy of depression*: The Guilford Press, 1979.
44. Manicavasgar V, Parker G, Perich T. Mindfulness-based cognitive therapy vs cognitive behaviour therapy as a treatment for non-melancholic depression. *J Affect Disord* 2011;130(1-2):138-44.
45. Kenny MA, Williams JM. Treatment-resistant depressed patients show a good response to Mindfulness-based Cognitive Therapy. *Behav Res Ther* 2007;45(3):617-25.
46. *Psykologisk behandling vid depression : teorier, terapimetoder och forskning A1 - Andersson, Gerhard Y1 - 2012*.
47. Andersson G. *Psykologisk behandling vid depression: teorier, terapimetoder och forskning*. 2012.
48. Bishop SR. What do we really know about mindfulness-based stress reduction? *Psychosom Med* 2002;64(1):71-83.
49. Vessey JT, Howard KI. Who seeks psychotherapy? *Psychotherapy: Theory, Research, Practice, Training* 1993;30(4):546.
50. Howard KI, Cornille TA, Lyons JS, Vessey JT. Patterns of mental health service utilization. *Archives of General Psychiatry* 1996.

**Table 1.** Demographic description of the participants at randomization.

|                                           |                             | <b>Behavioral activation<br/>(N = 40)</b> | <b>Mindfulness<br/>(N = 41)</b> | <b>Total<br/>(N = 81)</b> |
|-------------------------------------------|-----------------------------|-------------------------------------------|---------------------------------|---------------------------|
| <b>Age</b>                                | Mean (SD)                   | 36.6 (10.5)                               | 35.6 (11.3)                     | 36.1 (10.8)               |
|                                           | Min-Max                     | 20-59                                     | 21-61                           | 20-61                     |
| <b>Gender</b>                             | Female                      | 28 (70 %)                                 | 29 (70.7 %)                     | 57 (70 %)                 |
|                                           | Male                        | 12 (30 %)                                 | 12 (29.3 %)                     | 24 (30 %)                 |
| <b>Marital status</b>                     | Single                      | 15 (37.5 %)                               | 15 (36.6 %)                     | 30 (37 %)                 |
|                                           | Married                     | 19 (47.5 %)                               | 24 (58.6 %)                     | 43 (53.2 %)               |
|                                           | Divorced/widow/widower      | 5 (12.5 %)                                | 1 (2.4 %)                       | 6 (7.4 %)                 |
|                                           | Other                       | 1 (2.5 %)                                 | 1 (2.4 %)                       | 2 (2.4 %)                 |
| <b>Highest educational level</b>          | Nine year compulsory school | 1 (2.5 %)                                 | 2 (4.9 %)                       | 3 (3.8 %)                 |
|                                           | Secondary school            | 11 (27.5 %)                               | 14 (34.1 %)                     | 25 (30.9 %)               |
|                                           | College/university          | 27 (67.5 %)                               | 24 (58.5 %)                     | 51 (63 %)                 |
|                                           | Other                       | 1 (2.5 %)                                 | 1 (2.4 %)                       | 2 (2.5 %)                 |
| <b>Employment status</b>                  | Employed/student            | 35 (87.5 %)                               | 30 (73.2 %)                     | 65 (80.2 %)               |
|                                           | Unemployed                  | 3 (7.5 %)                                 | 3 (7.3 %)                       | 6 (7.4 %)                 |
|                                           | Retired                     | 0 (0 %)                                   | 1 (2.4 %)                       | 1 (1.2 %)                 |
|                                           | Other                       | 2 (6.3 %)                                 | 7 (17.1 %)                      | 9 (11.1 %)                |
| <b>Type of Smartphone</b>                 | Iphone                      | 24 (60 %)                                 | 23 (56.1 %)                     | 47 (58 %)                 |
|                                           | Android                     | 16 (40 %)                                 | 18 (43.9 %)                     | 34 (42 %)                 |
| <b>Medication</b>                         | Yes, earlier                | 10 (25 %)                                 | 13 (31.7 %)                     | 23 (28.4 %)               |
|                                           | Yes, present                | 12 (30 %)                                 | 14 (34.1 %)                     | 26 (32.1 %)               |
|                                           | None                        | 18 (45 %)                                 | 14 (34.1 %)                     | 32 (39.5 %)               |
| <b>Psychological treatment</b>            | Yes, earlier                | 19 (47.5 %)                               | 23 (56.1 %)                     | 42 (51.9 %)               |
|                                           | None                        | 21 (52.5 %)                               | 18 (43.9 %)                     | 39 (48.1 %)               |
| <b>Experience of self-help literature</b> | Yes                         | 12 (30 %)                                 | 13 (31.7 %)                     | 25 (30.9 %)               |
|                                           | None                        | 28 (70 %)                                 | 28 (68.3 %)                     | 56 (69.1 %)               |
| <b>Diagnosis</b>                          | Depression                  | 34 (85 %)                                 | 32 (78 %)                       | 66 (82.5 %)               |
|                                           | With dysthymia              | 22 (55 %)                                 | 18 (44 %)                       | 40 (49 %)                 |
|                                           | Earlier episodes            | 31 (77.5 %)                               | 34 (83 %)                       | 65 (80 %)                 |
|                                           | Panic disorder              | 1 (2.5 %)                                 | 3 (7.5 %)                       | 4 (5 %)                   |
|                                           | Social phobia               | 6 (15 %)                                  | 7 (17 %)                        | 13 (16 %)                 |
|                                           | GAD                         | 19 (47.5 %)                               | 10 (24.5 %)                     | 29 (36 %)                 |

**Table 2.** List of behaviors in the database.

1  
2  
3  
4  
5  
6  
7  
8  
9  
10  
11  
12  
13  
14  
15  
16  
17  
18  
19  
20  
21  
22  
23  
24  
25  
26  
27  
28  
29  
30  
31  
32  
33  
34  
35  
36  
37  
38  
39  
40  
41  
42  
43  
44  
45  
46  
47  
48  
49  
50  
51  
52  
53  
54  
55  
56  
57  
58  
59  
60**Everyday structure**

Get out of bed when the bell rings in the morning  
 Take a shower  
 Get ready in the morning  
 Eat breakfast  
 Read the newspaper  
 Make a meal plan for each day of the week  
 Make a shopping list for meals  
 Buy food for the meals you have planned  
 Prepare a simple meal  
 Clean a part of my home  
 Clean at least 15 minutes  
 Washing dishes immediately after a meal  
 Wash my clothes  
 Plan my TV viewing from TV schedules  
 Turn off the TV before 21:00 if I'm still watching TV  
 Turn off the computer before 21:00 if I'm still on the Internet  
 Take a brisk walk for 10 minutes  
 Log in to my online banking and pay a bill  
 Entering my weekly activities in my calendar

**Social behaviors**

Texting a friend and ask what he / she does  
 Call a friend and ask what the situation is  
 Take a walk with a friend  
 Book a meeting with someone in my family  
 Suggest a coffee with a friend or family member  
 Suggest a lunch with a friend or family member  
 Go to the playground with my kids  
 Bake something with my children  
 Meet a friend in the evening and ask how your day was  
 Watching an episode of a TV series with a friend  
 Go to the movies with a friend  
 Cooking with someone

**New activities**

Buy or borrow a book I wanted to read  
 Read at least 20 minutes out of a book  
 Go to a new cafe and coffee  
 Look up the nearest training center is  
 Read on about training online  
 Post a workout plan for the week  
 Ask a friend if he / she wants to come along and train  
 Spend at least 30 minutes of physical activity  
 Listen to a radio program  
 Watch a documentary on TV  
 Eat a good meal out  
 Write down at least two good things that happened around me  
 Rent a movie and have a night in  
 Look up the exhibits that are in my city  
 See an exhibition at a museum  
 Look up the concerts that are relevant right now  
 Go to a concert  
 Look up current things happening in my city  
 Attend a church service  
 Solve a crossword  
 Make a Sudoku  
 Listen to music without doing anything else and focus on what I hear  
 Go to town and buy something nice for myself

**Table 3.** Means, SDs and effect sizes (Cohen's d) for measures of depression, anxiety, psychological flexibility and quality of life.



| Outcome measure           | Mean (SD)     |                |                   | Effect size, d (95% CI) |                        |                        |                       |
|---------------------------|---------------|----------------|-------------------|-------------------------|------------------------|------------------------|-----------------------|
|                           | Pre-treatment | Post-treatment | 6-month follow-up | Between-group, pre-post | Between-group, pre-6FU | Within-group, pre-post | Within-group, pre-6FU |
| Total BDI-II              |               |                |                   |                         |                        |                        |                       |
| Behavioral activation BA  | 23.50 (7.85)  | 10.89 (5.92)   | 12.71 (10.56)     | 0.25 (-1.65-2.15)       | 0.03 (-2.63-2.69)      | 1.83 (0.27-3.38)       | 1.19 (-0.87-3.24)     |
| Mindfulness-MF            | 24.68 (9.47)  | 12.94 (10.18)  | 13.09 (12.24)     |                         |                        | 1.21 (-0.95-3.38)      | 1.09 (-1.32-3.50)     |
| PHQ-9                     |               |                |                   |                         |                        |                        |                       |
| Behavioral activation BA  | 12.53 (4.43)  | 5.83 (3.85)    | 6.77 (5.83)       | 0.28 (-0.85-1.40)       | 0.15 (-1.39-1.69)      | 1.63 (0.71-2.56)       | 1.14 (-0.01-2.28)     |
| Mindfulness-MF            | 13.22 (4.81)  | 7.19 (5.84)    | 7.74 (7.33)       |                         |                        | 1.15 (-0.02-2.32)      | 0.91 (-0.44-2.27)     |
| BAI                       |               |                |                   |                         |                        |                        |                       |
| Behavioral activation BA  | 14.60 (9.09)  | 8.81 (5.77)    | 8.34 (8.50)       | 0.06 (-1.49-1.61)       | 0.01 (-1.86-1.87)      | 0.76 (-0.95-2.47)      | 0.72 (-1.25-2.69)     |
| Mindfulness-MF            | 13.51 (9.31)  | 9.22 (7.68)    | 8.38 (7.48)       |                         |                        | 0.51 (-1.39-2.40)      | 0.61 (-1.30-2.51)     |
| AAQ-II                    |               |                |                   |                         |                        |                        |                       |
| Behavioral activation BA  | 27.28 (7.05)  | 21.22 (8.24)   | 20.09 (9.28)      | 0.22 (-1.97-2.41)       | 0.10 (-2.10-2.31)      | 0.80 (-0.89-2.50)      | 0.89 (-0.93-2.72)     |
| Mindfulness-MF            | 28.22 (7.09)  | 23.32 (10.82)  | 21.03 (9.68)      |                         |                        | 0.56 (-1.44-2.54)      | 0.87 (-1.00-2.74)     |
| QoLI                      |               |                |                   |                         |                        |                        |                       |
| Behavioral activation BA  | -0.45 (1.38)  | 0.92 (1.66)    | 1.15 (2.40)       | 0.05 (-0.36-0.45)       | 0.01 (-0.53-0.51)      | 0.91 (0.58-1.25)       | 0.84 (0.41-1.27)      |
| Mindfulness-MF            | -0.20 (1.51)  | 0.84 (1.90)    | 1.13 (2.07)       |                         |                        | 0.62 (0.24-0.99)       | 0.75 (0.36-1.15)      |
| H-L High level depression |               |                |                   |                         |                        |                        |                       |
| Behavioral activation BA  | 26.87 (7.14)  | 12.00 (6.31)   | 11.81 (10.63)     | 0.42 (-2.09-2.93)       | 0.39 (-2.95-3.73)      | 2.25 (0.33-4.18)       | 1.72 (-0.87-4.31)     |
| Mindfulness-MF            | 28.00 (8.61)  | 15.68 (10.76)  | 16.28 (12.71)     |                         |                        | 1.62 (-0.44-3.67)      | 1.32 (-1.07-3.71)     |
| PHQ-9                     |               |                |                   |                         |                        |                        |                       |
| Behavioral activation BA  | 15.52 (3.29)  | 6.64 (4.42)    | 6.48 (5.59)       | 0.36 (-1.17-1.90)       | 0.47 (-1.46-2.40)      | 2.34 (1.23-3.45)       | 2.04 (0.73-3.35)      |
| Mindfulness-MF            | 15.57 (3.35)  | 8.60 (6.29)    | 9.60 (7.71)       |                         |                        | 1.43 (0.13-2.74)       | 1.05 (-0.49-2.58)     |
| BAI                       |               |                |                   |                         |                        |                        |                       |
| Behavioral activation BA  | 17.43 (9.37)  | 9.18 (6.68)    | 9.62 (8.91)       | 0.20                    | 0.01                   | 1.03 (-1.30-3.37)      | 0.87 (-1.77-3.52)     |

- Formatted ... [1]
- Formatted ... [3]
- Formatted ... [2]
- Formatted ... [4]
- Formatted ... [5]
- Formatted Table ... [6]
- Formatted ... [7]
- Formatted ... [8]
- Formatted ... [9]
- Formatted ... [10]
- Formatted ... [11]
- Formatted ... [12]
- Formatted ... [13]
- Formatted ... [14]
- Formatted ... [15]
- Formatted ... [16]
- Formatted ... [17]
- Formatted ... [19]
- Formatted ... [20]
- Formatted ... [21]
- Formatted ... [22]
- Formatted ... [23]
- Formatted ... [24]
- Formatted ... [25]
- Formatted ... [18]
- Formatted ... [27]
- Formatted ... [28]
- Formatted ... [29]
- Formatted ... [30]
- Formatted ... [31]
- Formatted ... [32]
- Formatted ... [33]
- Formatted ... [26]
- Formatted ... [35]
- Formatted ... [36]
- Formatted ... [37]
- Formatted ... [38]
- Formatted ... [39]
- Formatted ... [40]
- Formatted ... [41]
- Formatted ... [34]
- Formatted ... [43]
- Formatted ... [44]
- Formatted ... [45]
- Formatted ... [46]
- Formatted ... [47]
- Formatted ... [48]
- Formatted ... [49]
- Formatted ... [42]
- Formatted ... [51]
- Formatted ... [52]
- Formatted ... [53]
- Formatted ... [54]
- Formatted ... [55]
- Formatted ... [56]
- Formatted ... [57]
- Formatted ... [50]
- Formatted ... [58]

1  
2  
3  
4  
5  
6  
7  
8  
9  
10  
11  
12  
13  
14  
15  
16  
17  
18  
19  
20  
21  
22  
23  
24  
25  
26  
27  
28  
29  
30  
31  
32  
33  
34  
35  
36  
37  
38  
39  
40  
41  
42  
43  
44  
45  
46  
47  
48  
49  
50  
51  
52  
53  
54  
55  
56  
57  
58  
59  
60

|                                   |              |               |               |              |                   |                   |                   |
|-----------------------------------|--------------|---------------|---------------|--------------|-------------------|-------------------|-------------------|
| Behavioral activation BA          | 15.57 (9.39) | 10.68 (8.39)  | 9.72 (7.91)   | (-1.94-2.34) | (-2.36-2.38)      | 0.56 (-1.80-2.92) | 0.68 (-1.62-2.99) |
| Mindfulness-MF AAQ-II             | 28.27 (7.21) | 21.68 (8.90)  | 19.33 (9.27)  | 0.44         | 0.47              | 0.83 (-1.47-3.14) | 1.11 (-1.28-3.49) |
| Behavioral activation BA          | 29.04 (6.50) | 25.87 (10.52) | 23.56 (9.33)  | (-2.30-3.18) | (-2.16-3.09)      | 0.38 (-1.90-2.65) | 0.70 (-1.40-2.80) |
| Mindfulness-MF QoLI               | -0.51 (1.30) | 0.78 (1.58)   | 1.25 (2.07)   | 0.26         | 0.34              | 0.91 (0.50-1.33)  | 1.05 (0.56-1.55)  |
| Behavioral activation BA          | -0.71 (1.18) | 0.38 (1.58)   | 0.53 (2.23)   | (-0.70-0.18) | (-0.95-0.27)      | 0.80 (0.44-1.17)  | 0.72 (0.26-1.18)  |
| Low-L-L Delevel depression BDI-II | 18.94 (6.47) | 9.14 (4.96)   | 14.07 (10.71) | -0.51        | -1.2148           | 1.74 (-0.25-3.72) | 0.58 (-2.36-3.52) |
| Behavioral activation BA          | 17.54 (7.09) | 6.73 (4.86)   | 4.22 (3.63)   | (-2.36-1.34) | (-2.6894-12.2371) | 1.83 (-0.54-4.19) | 2.35 (-0.03-4.72) |
| Mindfulness-MF PHQ-9              | 8.47 (1.59)  | 4.57 (2.34)   | 7.21 (6.36)   | -0.23        | -0.987            | 2.06 (1.39-2.72)  | 0.30 (-1.21-1.80) |
| Behavioral activation BA          | 8.15 (3.34)  | 4.00 (2.86)   | 2.56 (1.51)   | (-1.20-0.74) | (-4.6913-10.6372) | 1.38 (0.19-2.59)  | 2.13 (1.03-3.23)  |
| Mindfulness-MF BAI                | 10.76 (7.33) | 8.21 (4.10)   | 6.43 (7.80)   | -0.56        | -0.27             | 0.43 (-1.64-2.51) | 0.59 (-1.98-3.16) |
| Behavioral activation BA          | 9.08 (7.70)  | 5.91 (4.48)   | 4.67 (4.64)   | (-2.17-1.04) | (-2.92-2.38)      | 0.51 (-1.95-2.98) | 0.67 (-1.95-3.34) |
| Mindfulness-MF AAQ-II             | 26.00 (6.85) | 20.50 (7.34)  | 21.21 (9.54)  | -0.37        | -0.87             | 0.80 (-1.61-3.21) | 0.61 (-2.17-3.39) |
| Behavioral activation BA          | 26.46 (8.21) | 17.52 (9.54)  | 14.00 (7.07)  | (-3.52-2.78) | (-4.26-2.52)      | 1.06 (-2.33-4.44) | 1.68 (-1.42-4.78) |
| Mindfulness-MF QoLI               | -0.37 (1.52) | 1.14 (1.83)   | 0.97 (2.15)   | -0.38        | -0.93             | 0.94 (0.37-1.50)  | 0.76 (0.13-1.38)  |
| Behavioral activation BA          | 0.89 (1.61)  | 1.87 (2.24)   | 2.87 (2.10)   | (-0.38-1.14) | (-1.77-0.10)      | 0.53 (-0.20-1.27) | 1.14 (0.41-1.87)  |

- Formatted ... [77]
- Formatted ... [78]
- Formatted ... [79]
- Formatted ... [80]
- Formatted ... [81]
- Formatted ... [82]
- Formatted ... [83]
- Formatted ... [76]
- Formatted ... [85]
- Formatted ... [86]
- Formatted ... [87]
- Formatted ... [88]
- Formatted ... [89]
- Formatted ... [90]
- Formatted ... [91]
- Formatted ... [84]
- Formatted ... [93]
- Formatted ... [94]
- Formatted ... [95]
- Formatted ... [96]
- Formatted ... [97]
- Formatted ... [98]
- Formatted ... [99]
- Formatted ... [92]
- Formatted ... [100]
- Formatted ... [101]
- Formatted ... [103]
- Formatted ... [104]
- Formatted ... [105]
- Formatted ... [106]
- Formatted ... [108]
- Formatted ... [109]
- Formatted ... [107]
- Formatted ... [102]
- Formatted ... [111]
- Formatted ... [112]
- Formatted ... [113]
- Formatted ... [114]
- Formatted ... [116]
- Formatted ... [117]
- Formatted ... [115]
- Formatted ... [110]
- Formatted ... [119]
- Formatted ... [120]
- Formatted ... [121]
- Formatted ... [122]
- Formatted ... [123]
- Formatted ... [124]
- Formatted ... [125]
- Formatted ... [118]
- Formatted ... [127]
- Formatted ... [128]
- Formatted ... [129]
- Formatted ... [130]
- Formatted ... [131]
- Formatted ... [132]
- Formatted ... [133]
- Formatted ... [126]

Abbreviations: BA: Behavioral activation; MF: Mindfulness; H-L Dep: High-level depression; L-L Dep:

1  
2  
3  
4  
5  
6  
7  
8  
9 | Low-level depression: BDI-II: Beck Depression Inventory-II; PHQ-9: 9-item Patient Health  
10 Questionnaire Depression Scale; BAI: Beck Anxiety Inventory; AAQ-II: Acceptance and Action  
11 Questionnaire; QOLI: Quality of Life Inventory.  
12  
13  
14  
15  
16  
17  
18  
19  
20  
21  
22  
23  
24  
25  
26  
27  
28  
29  
30  
31  
32  
33  
34  
35  
36  
37  
38  
39  
40  
41  
42  
43  
44  
45  
46  
47  
48  
49  
50  
51  
52  
53  
54  
55  
56  
57  
58  
59  
60

1  
2  
3  
4  
5  
6  
7  
8  
9  
10  
11  
12 **Page 23: [1] Formatted** **Kien Hoa Ly** **8/19/2013 1:08:00 PM**

13 Font: 7 pt

14  
15  
16 **Page 23: [2] Formatted** **Kien Hoa Ly** **8/19/2013 1:40:00 PM**

17 Tab stops: 0.56", Left + 2.81", Left

18  
19  
20 **Page 23: [3] Formatted** **Kien Hoa Ly** **8/19/2013 1:08:00 PM**

21 Font: 7 pt

22  
23  
24 **Page 23: [4] Formatted** **Kien Hoa Ly** **8/19/2013 1:08:00 PM**

25 Font: 7 pt

26  
27  
28 **Page 23: [5] Formatted** **Kien Hoa Ly** **8/19/2013 1:38:00 PM**

29 Space After: 0 pt

30  
31  
32 **Page 23: [6] Formatted Table** **Kien Hoa Ly** **8/19/2013 1:42:00 PM**

33 Formatted Table

34  
35  
36 **Page 23: [7] Formatted** **Kien Hoa Ly** **8/19/2013 1:08:00 PM**

37 Font: 7 pt

38  
39  
40 **Page 23: [8] Formatted** **Kien Hoa Ly** **8/19/2013 1:08:00 PM**

41 Font: 7 pt

42  
43  
44 **Page 23: [9] Formatted** **Kien Hoa Ly** **8/19/2013 1:08:00 PM**

45 Font: 7 pt

46  
47  
48 **Page 23: [10] Formatted** **Kien Hoa Ly** **8/19/2013 1:08:00 PM**

49 Font: 7 pt

50  
51  
52 **Page 23: [11] Formatted** **Kien Hoa Ly** **8/19/2013 1:08:00 PM**

53 Font: 7 pt

54  
55  
56 **Page 23: [12] Formatted** **Kien Hoa Ly** **8/19/2013 1:08:00 PM**

57 Font: 7 pt

58  
59  
60 **Page 23: [13] Formatted** **Kien Hoa Ly** **8/19/2013 1:08:00 PM**

Font: 7 pt

For peer review only - <http://bmjopen.bmj.com/site/about/guidelines.xhtml>

**Page 23: [14] Formatted** **Kien Hoa Ly** **8/19/2013 1:08:00 PM**

Font: 7 pt

1  
2  
3  
4  
5  
6  
7  
8  
9  
10  
11  
12 **Page 23: [15] Formatted** **Kien Hoa Ly** **8/19/2013 1:08:00 PM**

13 Font: 7 pt

14  
15  
16 **Page 23: [16] Formatted** **Kien Hoa Ly** **8/19/2013 1:08:00 PM**

17 Font: 7 pt

18  
19  
20 **Page 23: [17] Formatted** **Kien Hoa Ly** **8/19/2013 1:07:00 PM**

21 Tab stops: 2.38", Left + Not at 2.33"

22  
23  
24 **Page 23: [18] Formatted** **Kien Hoa Ly** **8/19/2013 1:08:00 PM**

25 Font: 7 pt

26  
27  
28 **Page 23: [19] Formatted** **Kien Hoa Ly** **8/19/2013 1:08:00 PM**

29 Font: 7 pt

30  
31  
32 **Page 23: [20] Formatted** **Kien Hoa Ly** **8/19/2013 1:08:00 PM**

33 Font: 7 pt

34  
35  
36 **Page 23: [21] Formatted** **Kien Hoa Ly** **8/19/2013 1:08:00 PM**

37 Font: 7 pt

38  
39  
40 **Page 23: [22] Formatted** **Kien Hoa Ly** **8/19/2013 1:08:00 PM**

41 Font: 7 pt

42  
43  
44 **Page 23: [23] Formatted** **Kien Hoa Ly** **8/19/2013 1:08:00 PM**

45 Font: 7 pt

46  
47  
48 **Page 23: [24] Formatted** **Kien Hoa Ly** **8/19/2013 1:08:00 PM**

49 Font: 7 pt

50  
51  
52 **Page 23: [25] Formatted** **Kien Hoa Ly** **8/19/2013 1:08:00 PM**

53 Font: 7 pt

54  
55  
56 **Page 23: [26] Formatted** **Kien Hoa Ly** **8/19/2013 1:08:00 PM**

57 Font: 7 pt

58  
59  
60 **Page 23: [27] Formatted** **Kien Hoa Ly** **8/19/2013 1:08:00 PM**

Font: 7 pt

For peer review only - <http://bmjopen.bmj.com/site/about/guidelines.xhtml>

**Page 23: [28] Formatted** **Kien Hoa Ly** **8/19/2013 1:08:00 PM**

Font: 7 pt

1  
2  
3  
4  
5  
6  
7  
8  
9  
10  
11  
12  
13  
14  
15  
16  
17  
18  
19  
20  
21  
22  
23  
24  
25  
26  
27  
28  
29  
30  
31  
32  
33  
34  
35  
36  
37  
38  
39  
40  
41  
42  
43  
44  
45  
46  
47  
48  
49  
50  
51  
52  
53  
54  
55  
56  
57  
58  
59  
60

**Page 23: [29] Formatted** Kien Hoa Ly 8/19/2013 1:08:00 PM

Font: 7 pt

**Page 23: [30] Formatted** Kien Hoa Ly 8/19/2013 1:08:00 PM

Font: 7 pt

**Page 23: [31] Formatted** Kien Hoa Ly 8/19/2013 1:08:00 PM

Font: 7 pt

**Page 23: [32] Formatted** Kien Hoa Ly 8/19/2013 1:08:00 PM

Font: 7 pt

**Page 23: [33] Formatted** Kien Hoa Ly 8/19/2013 1:08:00 PM

Font: 7 pt

**Page 23: [34] Formatted** Kien Hoa Ly 8/19/2013 1:08:00 PM

Font: 7 pt

**Page 23: [35] Formatted** Kien Hoa Ly 8/19/2013 1:08:00 PM

Font: 7 pt

**Page 23: [36] Formatted** Kien Hoa Ly 8/19/2013 1:08:00 PM

Font: 7 pt

**Page 23: [37] Formatted** Kien Hoa Ly 8/19/2013 1:08:00 PM

Font: 7 pt

**Page 23: [38] Formatted** Kien Hoa Ly 8/19/2013 1:08:00 PM

Font: 7 pt

**Page 23: [39] Formatted** Kien Hoa Ly 8/19/2013 1:08:00 PM

Font: 7 pt

**Page 23: [40] Formatted** Kien Hoa Ly 8/19/2013 1:08:00 PM

Font: 7 pt

**Page 23: [41] Formatted** Kien Hoa Ly 8/19/2013 1:08:00 PM

Font: 7 pt

For peer review only - <http://bmjopen.bmj.com/site/about/guidelines.xhtml>

**Page 23: [42] Formatted** Kien Hoa Ly 8/19/2013 1:08:00 PM

Font: 7 pt

1  
2  
3  
4  
5  
6  
7  
8  
9  
10  
11  
12 **Page 23: [43] Formatted** **Kien Hoa Ly** **8/19/2013 1:08:00 PM**

13 Font: 7 pt

14  
15  
16 **Page 23: [44] Formatted** **Kien Hoa Ly** **8/19/2013 1:08:00 PM**

17 Font: 7 pt

18  
19  
20 **Page 23: [45] Formatted** **Kien Hoa Ly** **8/19/2013 1:08:00 PM**

21 Font: 7 pt

22  
23  
24 **Page 23: [46] Formatted** **Kien Hoa Ly** **8/19/2013 1:08:00 PM**

25 Font: 7 pt

26  
27  
28 **Page 23: [47] Formatted** **Kien Hoa Ly** **8/19/2013 1:08:00 PM**

29 Font: 7 pt

30  
31  
32 **Page 23: [48] Formatted** **Kien Hoa Ly** **8/19/2013 1:08:00 PM**

33 Font: 7 pt

34  
35  
36 **Page 23: [49] Formatted** **Kien Hoa Ly** **8/19/2013 1:08:00 PM**

37 Font: 7 pt

38  
39  
40 **Page 23: [50] Formatted** **Kien Hoa Ly** **8/19/2013 1:08:00 PM**

41 Font: 7 pt

42  
43  
44 **Page 23: [51] Formatted** **Kien Hoa Ly** **8/19/2013 1:08:00 PM**

45 Font: 7 pt

46  
47  
48 **Page 23: [52] Formatted** **Kien Hoa Ly** **8/19/2013 1:08:00 PM**

49 Font: 7 pt

50  
51  
52 **Page 23: [53] Formatted** **Kien Hoa Ly** **8/19/2013 1:08:00 PM**

53 Font: 7 pt

54  
55  
56 **Page 23: [54] Formatted** **Kien Hoa Ly** **8/19/2013 1:08:00 PM**

57 Font: 7 pt

58  
59  
60 **Page 23: [55] Formatted** **Kien Hoa Ly** **8/19/2013 1:08:00 PM**

Font: 7 pt

For peer review only - <http://bmjopen.bmj.com/site/about/guidelines.xhtml>

**Page 23: [56] Formatted** **Kien Hoa Ly** **8/19/2013 1:08:00 PM**

Font: 7 pt

1  
2  
3  
4  
5  
6  
7  
8  
9  
10  
11  
12 **Page 23: [57] Formatted** **Kien Hoa Ly** **8/19/2013 1:08:00 PM**

13 Font: 7 pt

14  
15  
16 **Page 23: [58] Formatted** **Kien Hoa Ly** **8/19/2013 1:08:00 PM**

17 Font: 7 pt

18  
19  
20 **Page 23: [59] Formatted** **Kien Hoa Ly** **8/19/2013 1:08:00 PM**

21 Font: 7 pt

22  
23  
24 **Page 23: [60] Formatted** **Kien Hoa Ly** **8/19/2013 1:08:00 PM**

25 Font: 7 pt

26  
27  
28 **Page 23: [61] Formatted** **Kien Hoa Ly** **8/19/2013 1:08:00 PM**

29 Font: 7 pt

30  
31  
32 **Page 23: [62] Formatted** **Kien Hoa Ly** **8/19/2013 1:08:00 PM**

33 Font: 7 pt

34  
35  
36 **Page 23: [63] Formatted** **Kien Hoa Ly** **8/19/2013 1:08:00 PM**

37 Font: 7 pt

38  
39  
40 **Page 23: [64] Formatted** **Kien Hoa Ly** **8/19/2013 1:08:00 PM**

41 Font: 7 pt

42  
43  
44 **Page 23: [65] Formatted** **Kien Hoa Ly** **8/19/2013 1:08:00 PM**

45 Font: 7 pt

46  
47  
48 **Page 23: [66] Formatted** **Kien Hoa Ly** **8/19/2013 1:08:00 PM**

49 Font: 7 pt

50  
51  
52 **Page 23: [67] Formatted** **Kien Hoa Ly** **8/19/2013 1:08:00 PM**

53 Font: 7 pt

54  
55  
56 **Page 23: [68] Formatted** **Kien Hoa Ly** **8/19/2013 1:08:00 PM**

57 Font: 7 pt

58  
59  
60 **Page 23: [69] Formatted** **Kien Hoa Ly** **8/19/2013 1:08:00 PM**

Font: 7 pt

For peer review only - <http://bmjopen.bmj.com/site/about/guidelines.xhtml>

**Page 23: [70] Formatted** **Kien Hoa Ly** **8/19/2013 1:08:00 PM**

Font: 7 pt



1  
2  
3  
4  
5  
6  
7  
8  
9  
10  
11  
12 **Page 23: [71] Formatted** **Kien Hoa Ly** **8/19/2013 1:08:00 PM**

13 Font: 7 pt

14  
15  
16 **Page 23: [72] Formatted** **Kien Hoa Ly** **8/19/2013 1:08:00 PM**

17 Font: 7 pt

18  
19  
20 **Page 23: [73] Formatted** **Kien Hoa Ly** **8/19/2013 1:08:00 PM**

21 Font: 7 pt

22  
23  
24 **Page 23: [74] Formatted** **Kien Hoa Ly** **8/19/2013 1:08:00 PM**

25 Font: 7 pt

26  
27  
28 **Page 23: [75] Formatted** **Kien Hoa Ly** **8/19/2013 1:08:00 PM**

29 Font: 7 pt

30  
31  
32 **Page 24: [76] Formatted** **Kien Hoa Ly** **8/19/2013 1:08:00 PM**

33 Font: 7 pt

34  
35  
36 **Page 24: [77] Formatted** **Kien Hoa Ly** **8/19/2013 1:08:00 PM**

37 Font: 7 pt

38  
39  
40 **Page 24: [78] Formatted** **Kien Hoa Ly** **8/19/2013 1:08:00 PM**

41 Font: 7 pt

42  
43  
44 **Page 24: [79] Formatted** **Kien Hoa Ly** **8/19/2013 1:08:00 PM**

45 Font: 7 pt

46  
47  
48 **Page 24: [80] Formatted** **Kien Hoa Ly** **8/19/2013 1:08:00 PM**

49 Font: 7 pt

50  
51  
52 **Page 24: [81] Formatted** **Kien Hoa Ly** **8/19/2013 1:08:00 PM**

53 Font: 7 pt

54  
55  
56 **Page 24: [82] Formatted** **Kien Hoa Ly** **8/19/2013 1:08:00 PM**

57 Font: 7 pt

58  
59  
60 **Page 24: [83] Formatted** **Kien Hoa Ly** **8/19/2013 1:08:00 PM**

Font: 7 pt

For peer review only - <http://bmjopen.bmj.com/site/about/guidelines.xhtml>

**Page 24: [84] Formatted** **Kien Hoa Ly** **8/19/2013 1:08:00 PM**

Font: 7 pt

1  
2  
3  
4  
5  
6  
7  
8  
9  
10  
11  
12  
13  
14  
15  
16  
17  
18  
19  
20  
21  
22  
23  
24  
25  
26  
27  
28  
29  
30  
31  
32  
33  
34  
35  
36  
37  
38  
39  
40  
41  
42  
43  
44  
45  
46  
47  
48  
49  
50  
51  
52  
53  
54  
55  
56  
57  
58  
59  
60

**Page 24: [85] Formatted** Kien Hoa Ly 8/19/2013 1:08:00 PM

Font: 7 pt

**Page 24: [86] Formatted** Kien Hoa Ly 8/19/2013 1:08:00 PM

Font: 7 pt

**Page 24: [87] Formatted** Kien Hoa Ly 8/19/2013 1:08:00 PM

Font: 7 pt

**Page 24: [88] Formatted** Kien Hoa Ly 8/19/2013 1:08:00 PM

Font: 7 pt

**Page 24: [89] Formatted** Kien Hoa Ly 8/19/2013 1:08:00 PM

Font: 7 pt

**Page 24: [90] Formatted** Kien Hoa Ly 8/19/2013 1:08:00 PM

Font: 7 pt

**Page 24: [91] Formatted** Kien Hoa Ly 8/19/2013 1:08:00 PM

Font: 7 pt

**Page 24: [92] Formatted** Kien Hoa Ly 8/19/2013 1:08:00 PM

Font: 7 pt

**Page 24: [93] Formatted** Kien Hoa Ly 8/19/2013 1:08:00 PM

Font: 7 pt

**Page 24: [94] Formatted** Kien Hoa Ly 8/19/2013 1:08:00 PM

Font: 7 pt

**Page 24: [95] Formatted** Kien Hoa Ly 8/19/2013 1:08:00 PM

Font: 7 pt

**Page 24: [96] Formatted** Kien Hoa Ly 8/19/2013 1:08:00 PM

Font: 7 pt

**Page 24: [97] Formatted** Kien Hoa Ly 8/19/2013 1:08:00 PM

Font: 7 pt

For peer review only - <http://bmjopen.bmj.com/site/about/guidelines.xhtml>

**Page 24: [98] Formatted** Kien Hoa Ly 8/19/2013 1:08:00 PM

Font: 7 pt

1  
2  
3  
4  
5  
6  
7  
8  
9  
10  
11  
12 **Page 24: [99] Formatted** **Kien Hoa Ly** **8/19/2013 1:08:00 PM**

13 Font: 7 pt

14  
15  
16 **Page 24: [100] Formatted** **Kien Hoa Ly** **8/19/2013 1:08:00 PM**

17 Font: 7 pt

18  
19  
20 **Page 24: [101] Formatted** **Kien Hoa Ly** **8/19/2013 1:08:00 PM**

21 Font: 7 pt

22  
23  
24 **Page 24: [102] Formatted** **Kien Hoa Ly** **8/19/2013 1:08:00 PM**

25 Font: 7 pt

26  
27  
28 **Page 24: [103] Formatted** **Kien Hoa Ly** **8/19/2013 1:08:00 PM**

29 Font: 7 pt

30  
31  
32 **Page 24: [104] Formatted** **Kien Hoa Ly** **8/19/2013 1:08:00 PM**

33 Font: 7 pt

34  
35  
36 **Page 24: [105] Formatted** **Kien Hoa Ly** **8/19/2013 1:08:00 PM**

37 Font: 7 pt

38  
39  
40 **Page 24: [106] Formatted** **Kien Hoa Ly** **8/19/2013 1:08:00 PM**

41 Font: 7 pt

42  
43  
44 **Page 24: [107] Formatted** **Kien Hoa Ly** **8/19/2013 1:08:00 PM**

45 Font: 7 pt

46  
47  
48 **Page 24: [108] Formatted** **Kien Hoa Ly** **8/19/2013 1:08:00 PM**

49 Font: 7 pt

50  
51  
52 **Page 24: [109] Formatted** **Kien Hoa Ly** **8/19/2013 1:08:00 PM**

53 Font: 7 pt

54  
55  
56 **Page 24: [110] Formatted** **Kien Hoa Ly** **8/19/2013 1:08:00 PM**

57 Font: 7 pt

58  
59  
60 **Page 24: [111] Formatted** **Kien Hoa Ly** **8/19/2013 1:08:00 PM**

Font: 7 pt

For peer review only - <http://bmjopen.bmj.com/site/about/guidelines.xhtml>

**Page 24: [112] Formatted** **Kien Hoa Ly** **8/19/2013 1:08:00 PM**

Font: 7 pt

1  
2  
3  
4  
5  
6  
7  
8  
9  
10  
11  
12 **Page 24: [113] Formatted** **Kien Hoa Ly** **8/19/2013 1:08:00 PM**

13 Font: 7 pt

14  
15  
16 **Page 24: [114] Formatted** **Kien Hoa Ly** **8/19/2013 1:08:00 PM**

17 Font: 7 pt

18  
19  
20 **Page 24: [115] Formatted** **Kien Hoa Ly** **8/19/2013 1:08:00 PM**

21 Font: 7 pt

22  
23  
24 **Page 24: [116] Formatted** **Kien Hoa Ly** **8/19/2013 1:08:00 PM**

25 Font: 7 pt

26  
27  
28 **Page 24: [117] Formatted** **Kien Hoa Ly** **8/19/2013 1:08:00 PM**

29 Font: 7 pt

30  
31  
32 **Page 24: [118] Formatted** **Kien Hoa Ly** **8/19/2013 1:08:00 PM**

33 Font: 7 pt

34  
35  
36 **Page 24: [119] Formatted** **Kien Hoa Ly** **8/19/2013 1:08:00 PM**

37 Font: 7 pt

38  
39  
40 **Page 24: [120] Formatted** **Kien Hoa Ly** **8/19/2013 1:08:00 PM**

41 Font: 7 pt

42  
43  
44 **Page 24: [121] Formatted** **Kien Hoa Ly** **8/19/2013 1:08:00 PM**

45 Font: 7 pt

46  
47  
48 **Page 24: [122] Formatted** **Kien Hoa Ly** **8/19/2013 1:08:00 PM**

49 Font: 7 pt

50  
51  
52 **Page 24: [123] Formatted** **Kien Hoa Ly** **8/19/2013 1:08:00 PM**

53 Font: 7 pt

54  
55  
56 **Page 24: [124] Formatted** **Kien Hoa Ly** **8/19/2013 1:08:00 PM**

57 Font: 7 pt

58  
59  
60 **Page 24: [125] Formatted** **Kien Hoa Ly** **8/19/2013 1:08:00 PM**

Font: 7 pt

For peer review only - <http://bmjopen.bmj.com/site/about/guidelines.xhtml>

**Page 24: [126] Formatted** **Kien Hoa Ly** **8/19/2013 1:08:00 PM**

Font: 7 pt

1  
2  
3  
4  
5  
6  
7  
8  
9  
10  
11  
12 **Page 24: [127] Formatted** **Kien Hoa Ly** **8/19/2013 1:08:00 PM**

13 Font: 7 pt

14  
15  
16 **Page 24: [128] Formatted** **Kien Hoa Ly** **8/19/2013 1:08:00 PM**

17 Font: 7 pt

18  
19  
20 **Page 24: [129] Formatted** **Kien Hoa Ly** **8/19/2013 1:08:00 PM**

21 Font: 7 pt

22  
23  
24 **Page 24: [130] Formatted** **Kien Hoa Ly** **8/19/2013 1:08:00 PM**

25 Font: 7 pt

26  
27  
28 **Page 24: [131] Formatted** **Kien Hoa Ly** **8/19/2013 1:08:00 PM**

29 Font: 7 pt

30  
31  
32 **Page 24: [132] Formatted** **Kien Hoa Ly** **8/19/2013 1:08:00 PM**

33 Font: 7 pt

34  
35  
36 **Page 24: [133] Formatted** **Kien Hoa Ly** **8/19/2013 1:08:00 PM**

37 Font: 7 pt

38  
39  
40 **Page 24: [134] Formatted** **Kien Hoa Ly** **8/19/2013 1:08:00 PM**

41 Font: 7 pt

42  
43  
44 **Page 24: [135] Formatted** **Kien Hoa Ly** **8/19/2013 1:08:00 PM**

45 Font: 7 pt

46  
47  
48 **Page 24: [136] Formatted** **Kien Hoa Ly** **8/19/2013 1:08:00 PM**

49 Font: 7 pt

50  
51  
52 **Page 24: [137] Formatted** **Kien Hoa Ly** **8/19/2013 1:08:00 PM**

53 Font: 7 pt

54  
55  
56 **Page 24: [138] Formatted** **Kien Hoa Ly** **8/19/2013 1:08:00 PM**

57 Font: 7 pt

58  
59  
60 **Page 24: [139] Formatted** **Kien Hoa Ly** **8/19/2013 1:08:00 PM**

Font: 7 pt

For peer review only - <http://bmjopen.bmj.com/site/about/guidelines.xhtml>

**Page 24: [140] Formatted** **Kien Hoa Ly** **8/19/2013 1:08:00 PM**

Font: 7 pt

1  
2  
3  
4  
5  
6  
7  
8  
9  
10  
11  
12  
13  
14  
15  
16  
17  
18  
19  
20  
21  
22  
23  
24  
25  
26  
27  
28  
29  
30  
31  
32  
33  
34  
35  
36  
37  
38  
39  
40  
41  
42  
43  
44  
45  
46  
47  
48  
49  
50  
51  
52  
53  
54  
55  
56  
57  
58  
59  
60

**Page 24: [141] Formatted** **Kien Hoa Ly** **8/19/2013 1:08:00 PM**

Font: 7 pt

**Page 24: [142] Formatted** **Kien Hoa Ly** **8/19/2013 1:08:00 PM**

Font: 7 pt

For peer review only



176x249mm (72 x 72 DPI)

1  
2  
3  
4  
5  
6  
7  
8  
9  
10  
11  
12  
13  
14  
15  
16  
17  
18  
19  
20  
21  
22  
23  
24  
25  
26  
27  
28  
29  
30  
31  
32  
33  
34  
35  
36  
37  
38  
39  
40  
41  
42  
43  
44  
45  
46  
47  
48  
49  
50  
51  
52  
53  
54  
55  
56  
57  
58  
59  
60

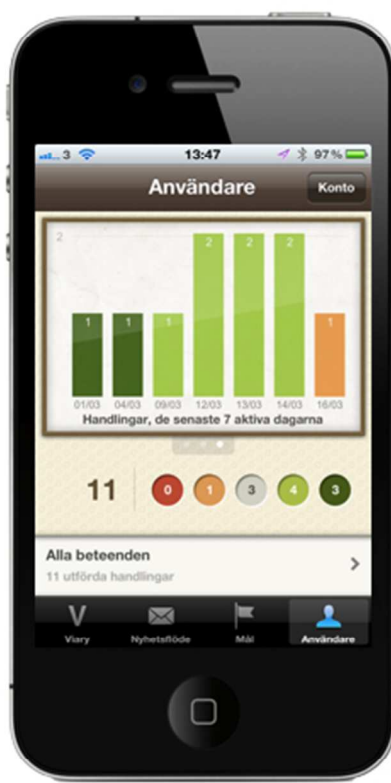

176x249mm (72 x 72 DPI)



1  
2  
3  
4  
5  
6  
7  
8  
9  
10  
11  
12  
13  
14  
15  
16  
17  
18  
19  
20  
21  
22  
23  
24  
25  
26  
27  
28  
29  
30  
31  
32  
33  
34  
35  
36  
37  
38  
39  
40  
41  
42  
43  
44  
45  
46  
47  
48  
49  
50  
51  
52  
53  
54  
55  
56  
57  
58  
59  
60

.....



.....

176x249mm (72 x 72 DPI)

## CONSORT 2010 Flow Diagram





## CONSORT 2010 checklist of information to include when reporting a randomised trial\*

| Section/Topic                    | Item No | Checklist item                                                                                                                                                                              | Reported on page No |
|----------------------------------|---------|---------------------------------------------------------------------------------------------------------------------------------------------------------------------------------------------|---------------------|
| <b>Title and abstract</b>        |         |                                                                                                                                                                                             |                     |
|                                  | 1a      | Identification as a randomised trial in the title                                                                                                                                           | 1                   |
|                                  | 1b      | Structured summary of trial design, methods, results, and conclusions (for specific guidance see CONSORT for abstracts)                                                                     | 2-3                 |
| <b>Introduction</b>              |         |                                                                                                                                                                                             |                     |
| Background and objectives        | 2a      | Scientific background and explanation of rationale                                                                                                                                          | 3-5                 |
|                                  | 2b      | Specific objectives or hypotheses                                                                                                                                                           | 5                   |
| <b>Methods</b>                   |         |                                                                                                                                                                                             |                     |
| Trial design                     | 3a      | Description of trial design (such as parallel, factorial) including allocation ratio                                                                                                        | 7                   |
|                                  | 3b      | Important changes to methods after trial commencement (such as eligibility criteria), with reasons                                                                                          | N/A                 |
| Participants                     | 4a      | Eligibility criteria for participants                                                                                                                                                       | 5                   |
|                                  | 4b      | Settings and locations where the data were collected                                                                                                                                        | 7                   |
| Interventions                    | 5       | The interventions for each group with sufficient details to allow replication, including how and when they were actually administered                                                       | 7-8                 |
| Outcomes                         | 6a      | Completely defined pre-specified primary and secondary outcome measures, including how and when they were assessed                                                                          | 6                   |
|                                  | 6b      | Any changes to trial outcomes after the trial commenced, with reasons                                                                                                                       | N/A                 |
| Sample size                      | 7a      | How sample size was determined                                                                                                                                                              | 9                   |
|                                  | 7b      | When applicable, explanation of any interim analyses and stopping guidelines                                                                                                                | N/A                 |
| Randomisation:                   |         |                                                                                                                                                                                             |                     |
| Sequence generation              | 8a      | Method used to generate the random allocation sequence                                                                                                                                      | 7                   |
|                                  | 8b      | Type of randomisation; details of any restriction (such as blocking and block size)                                                                                                         | 7                   |
| Allocation concealment mechanism | 9       | Mechanism used to implement the random allocation sequence (such as sequentially numbered containers), describing any steps taken to conceal the sequence until interventions were assigned | 7                   |
| Implementation                   | 10      | Who generated the random allocation sequence, who enrolled participants, and who assigned participants to interventions                                                                     | 7                   |
| Blinding                         | 11a     | If done, who was blinded after assignment to interventions (for example, participants, care providers, those assessing outcomes) and how                                                    | 6                   |

|    |                          |     |                                                                                                                  |
|----|--------------------------|-----|------------------------------------------------------------------------------------------------------------------|
| 1  |                          |     |                                                                                                                  |
| 2  |                          |     |                                                                                                                  |
| 3  |                          | 11b | If relevant, description of the similarity of interventions                                                      |
| 4  | Statistical methods      | 12a | Statistical methods used to compare groups for primary and secondary outcomes                                    |
| 5  |                          | 12b | Methods for additional analyses, such as subgroup analyses and adjusted analyses                                 |
| 6  |                          |     |                                                                                                                  |
| 7  | <b>Results</b>           |     |                                                                                                                  |
| 8  | Participant flow (a      | 13a | For each group, the numbers of participants who were randomly assigned, received intended treatment, and         |
| 9  | diagram is strongly      |     | were analysed for the primary outcome                                                                            |
| 10 | recommended)             | 13b | For each group, losses and exclusions after randomisation, together with reasons                                 |
| 11 | Recruitment              | 14a | Dates defining the periods of recruitment and follow-up                                                          |
| 12 |                          | 14b | Why the trial ended or was stopped                                                                               |
| 13 |                          |     |                                                                                                                  |
| 14 | Baseline data            | 15  | A table showing baseline demographic and clinical characteristics for each group                                 |
| 15 | Numbers analysed         | 16  | For each group, number of participants (denominator) included in each analysis and whether the analysis was      |
| 16 |                          |     | by original assigned groups                                                                                      |
| 17 |                          |     |                                                                                                                  |
| 18 | Outcomes and             | 17a | For each primary and secondary outcome, results for each group, and the estimated effect size and its            |
| 19 | estimation               |     | precision (such as 95% confidence interval)                                                                      |
| 20 |                          | 17b | For binary outcomes, presentation of both absolute and relative effect sizes is recommended                      |
| 21 | Ancillary analyses       | 18  | Results of any other analyses performed, including subgroup analyses and adjusted analyses, distinguishing       |
| 22 |                          |     | pre-specified from exploratory                                                                                   |
| 23 |                          |     |                                                                                                                  |
| 24 | Harms                    | 19  | All important harms or unintended effects in each group (for specific guidance see CONSORT for harms)            |
| 25 |                          |     |                                                                                                                  |
| 26 | <b>Discussion</b>        |     |                                                                                                                  |
| 27 | Limitations              | 20  | Trial limitations, addressing sources of potential bias, imprecision, and, if relevant, multiplicity of analyses |
| 28 | Generalisability         | 21  | Generalisability (external validity, applicability) of the trial findings                                        |
| 29 | Interpretation           | 22  | Interpretation consistent with results, balancing benefits and harms, and considering other relevant evidence    |
| 30 |                          |     |                                                                                                                  |
| 31 | <b>Other information</b> |     |                                                                                                                  |
| 32 | Registration             | 23  | Registration number and name of trial registry                                                                   |
| 33 | Protocol                 | 24  | Where the full trial protocol can be accessed, if available                                                      |
| 34 | Funding                  | 25  | Sources of funding and other support (such as supply of drugs), role of funders                                  |
| 35 |                          |     |                                                                                                                  |

36

37 \*We strongly recommend reading this statement in conjunction with the CONSORT 2010 Explanation and Elaboration for important clarifications on all the items. If relevant, we also

38 recommend reading CONSORT extensions for cluster randomised trials, non-inferiority and equivalence trials, non-pharmacological treatments, herbal interventions, and pragmatic trials.

39 Additional extensions are forthcoming: for those and for up to date references relevant to this checklist, see [www.consort-statement.org](http://www.consort-statement.org).

40

41

42

43



**Behavioral activation vs. Mindfulness-based guided self-help treatment administered through a smartphone application: a randomized controlled trial**

|                                 |                                                                                                                                                                                                                                                                                                                                                                                                                                                                                                                                                                                                                                                                                                                                          |
|---------------------------------|------------------------------------------------------------------------------------------------------------------------------------------------------------------------------------------------------------------------------------------------------------------------------------------------------------------------------------------------------------------------------------------------------------------------------------------------------------------------------------------------------------------------------------------------------------------------------------------------------------------------------------------------------------------------------------------------------------------------------------------|
| Journal:                        | <i>BMJ Open</i>                                                                                                                                                                                                                                                                                                                                                                                                                                                                                                                                                                                                                                                                                                                          |
| Manuscript ID:                  | bmjopen-2013-003440.R2                                                                                                                                                                                                                                                                                                                                                                                                                                                                                                                                                                                                                                                                                                                   |
| Article Type:                   | Research                                                                                                                                                                                                                                                                                                                                                                                                                                                                                                                                                                                                                                                                                                                                 |
| Date Submitted by the Author:   | 16-Oct-2013                                                                                                                                                                                                                                                                                                                                                                                                                                                                                                                                                                                                                                                                                                                              |
| Complete List of Authors:       | Ly, Kien Hoa; Linköping University, Department of Behavioural Sciences and Learning<br>Trüschel, Anna; Linköping University, Department of Behavioural Sciences and Learning<br>Jarl, Linnea; Linköping University, Department of Behavioural Sciences and Learning<br>Magnusson, Susanna; Linköping University, Department of Behavioural Sciences and Learning<br>Windahl, Tove; Linköping University, Department of Behavioural Sciences and Learning<br>Johansson, Robert; Linköping University, Department of Behavioural Sciences and Learning<br>Carlbring, Per; Stockholm University, Department of Psychology<br>Andersson, Gerhard; Karolinska Institutet, Department of Clinical Neuroscience, Center for Psychiatry Research |
| <b>Primary Subject Heading</b>: | Mental health                                                                                                                                                                                                                                                                                                                                                                                                                                                                                                                                                                                                                                                                                                                            |
| Secondary Subject Heading:      | Public health                                                                                                                                                                                                                                                                                                                                                                                                                                                                                                                                                                                                                                                                                                                            |
| Keywords:                       | Depression, Smartphone application, Behavioral activation, Mindfulness                                                                                                                                                                                                                                                                                                                                                                                                                                                                                                                                                                                                                                                                   |
|                                 |                                                                                                                                                                                                                                                                                                                                                                                                                                                                                                                                                                                                                                                                                                                                          |

SCHOLARONE™  
Manuscripts

# Behavioral activation vs. Mindfulness-based guided self-help treatment administered through a smartphone application: a randomized controlled trial

Kien Hoa Ly<sup>1§</sup>, Anna Trüschel<sup>1</sup>, Linnea Jarl<sup>1</sup>, Susanna Magnusson<sup>1</sup>, Tove Windahl<sup>1</sup>, Robert Johansson<sup>1</sup>, Per Carlbring<sup>2</sup>, Gerhard Andersson<sup>1,3</sup>

<sup>1</sup> Department of Behavioural Sciences and Learning, Linköping University, Linköping, Sweden

<sup>2</sup> Department of Psychology, Stockholm University, Stockholm, Sweden

<sup>3</sup> Department of Clinical Neuroscience, Center for Psychiatry Research, Karolinska Institutet, Stockholm, Sweden

§ Corresponding author

Email addresses:

KHL: kien.hoa.ly@liu.se

AT: annr005@student.liu.se

LJ: linja498@student.liu.se

SM: susma302@student.liu.se

TW: tovwi961@student.liu.se

RJ: robert.johansson@liu.se

PC: per@carlbring.se

GA: gerhard.andersson@liu.se

## Keywords

Depression, Behavioral activation, Smartphone application, Mindfulness.

## Abstract

### Objectives

Evaluating and comparing the effectiveness of two smartphone-delivered treatments; one based on BA and one on mindfulness.

### Design

Parallel randomized controlled, open, trial. Participants were allocated using an online randomization tool, handled by an independent person who was separate from the staff conducting the study.

### Setting

General community, with recruitment nationally through mass media and advertisements.

### Participants

40 participants diagnosed with major depressive disorder received a BA treatment, and 41 participants received a mindfulness treatment. 9 participants were lost at the post-treatment.

### Intervention

BA: An 8 week long behavior program administered via a smartphone application. Mindfulness: An 8 week long mindfulness program, administered via a smartphone application. □

### Main outcome measures

The Beck Depression Inventory-II (BDI-II) and the 9-item Patient Health Questionnaire Depression Scale (PHQ-9). □

### Results

81 participants were randomized (mean age 36.0 years (SD=10.8)) and analyzed. Results showed no significant interaction effects of group and time on any of the outcome measures neither from pre-treatment to post-treatment nor from pre-treatment to the 6-month follow up. Subgroup analyses showed that the BA treatment was more effective than the mindfulness treatment among participants with higher initial severity of depression from pre-treatment to the 6-month follow up (PHQ-9:  $F(1, 362.1)=5.2, p's<.05$ ). In contrast, the mindfulness treatment worked better than the BA treatment among participants with lower initial severity from pre-treatment to the 6-month follow up (PHQ-9:  $F(1, 69.3)=7.7, p's<.01$ ); BDI-II: ( $F(1, 53.60)=6.25, p's<.05$ ).

## Conclusions

The two interventions did not differ significantly from one another. For participants with higher severity of depression, the treatment based on BA was superior to the treatment based on mindfulness. For participants with lower initial severity, the treatment based on mindfulness worked significantly better than the treatment based on BA.

## Article Summary

### 1) Article Focus

- It is well established that guided self-help interventions, administered through internet, can have positive effects on symptoms of depression. There are, however, to our knowledge no controlled trials on smartphone-delivered behavioral activation, neither on mindfulness.
- Both behavioral activation and mindfulness are components in multi-component treatment packages, and as such they might be easier to target in smartphone applications than an entire treatment program would be, due to the need of simple and fast interaction with the treatment program.
- The aim of this study was to test the effects of two smartphone-delivered treatments; one based on behavioral activation and the other on mindfulness. We expected that behavioral activation would be superior to mindfulness for participants suffering from more severe depression.

### 2) Key Messages

- The large within-group effect sizes are comparable to other depression treatment and indicate that this smartphone format might work well for a depressed population.
- Behavioral activation might work better for a more severely depressed population, whereas mindfulness might work better for people suffering from light depression, at least in this smartphone format.
- Since smartphones likely will be integrated even further in society, they may be important in the future of making depression treatment and other psychological treatment more assimilated into people's daily life.

### 3) Strengths and Limitations.

- One of the first to do a randomized controlled trial using smartphone applications.
- Did not control for the different components separately, so we cannot determine which parts of the treatments were effective.



## Background

Major depressive disorder (MDD) is a major health problem, which lowers the quality of life for the individual and generates enormous costs for society<sup>1,2</sup>. Several forms of psychotherapy have been found to be effective in the treatment of MDD<sup>3</sup>. For example, behavioral activation (BA) has an established empirical base<sup>4</sup>. BA is an established psychological treatment derived from learning theory. It is aimed at increasing adequate behaviors and learning about links between behavior and mood. The efficacy of BA for treating MDD has been established in a number of studies over the past four decades<sup>5</sup>. Moreover, a dismantling study showed that BA could be as effective as the full cognitive behavior therapy (CBT) treatment package<sup>6</sup>. Moreover, in a later randomized controlled trial, BA was found to be as effective as antidepressant medication<sup>7</sup>.

It is also well established that guided self-help interventions, administered through internet, can have positive effects on symptoms of depression<sup>8-10</sup>. An increasing number of studies show that this treatment format can be as effective as face-to-face treatment for mild to moderate MDD and anxiety disorders<sup>9</sup>. Guided treatments distributed digitally have provided a way to reach out to more patients in a manner that in most cases requires less therapist time than face-to-face psychotherapy, but with similar clinical outcome<sup>11</sup>. There are, however, to our knowledge no controlled trial on internet-delivered pure BA, and no study using smartphones for the delivery of BA, even if studies are being conducted on smartphone-administered CBT<sup>12</sup>, for example in the treatment of MDD<sup>13</sup>.

Mindfulness is likewise BA, often used as a component in multi-component treatment packages, such as mindfulness-based cognitive therapy (MBCT;<sup>14</sup>), dialectical behavior therapy (DBT;<sup>15</sup>), and acceptance and commitment therapy (ACT;<sup>16</sup>). Studies have shown a significant negative correlation between mindfulness and depression<sup>17,18</sup>, meaning that more mindfulness practice is associated with lower levels of depression. Moreover, a meta-analysis based on 39 studies of mindfulness for depression and anxiety showed a moderate effect size of Hedges's  $g=0.59$  for improving mood symptoms<sup>19</sup>. The analysis also showed that mindfulness was effective for individuals with depression both as primary and secondary diagnosis. Moreover, mindfulness has been shown to be effective in relapse prevention in depression with an overall risk ratio mean of 0.66 (95% CI [0.53, 0.82],  $p's < .01$ )<sup>20</sup>, as well as for comorbid disorders such as anxiety<sup>21</sup>. Within digitally distributed treatments, mindfulness has appeared as a component in CBT-based internet treatments, but there have so far been few studies on mindfulness as a stand-alone, digitally distributed treatment for depression<sup>22</sup>.

Research suggests that depression severity is known to be a significant moderating factor in the treatment of depression. There are also indications that the difference between antidepressant medication and placebo is evident in severe depression, but not in mild to moderate depression<sup>23</sup>, and that combined treatments with medication and psychotherapy are more effective than single treatments<sup>24</sup>. These results suggest that baseline depression severity may moderate the response to different variants of treatments. Thus, it is concluded that different treatments distributed digitally can target different subgroups of depression, in terms of severity. For example, Dimidjian et al. (2006) found that among more severely depressed patients, behavioral activation was as effective as antidepressant medication, and significantly outperformed

1  
2  
3 cognitive therapy, whereas for the less severely depressed patients, no differential treatment  
4 effects were observed. However, in meta-analyses on BA versus cognitive therapy this has not  
5 been found<sup>24</sup>.  
6  
7

8  
9 The advantages as well as the challenges of using mobile phones in CBT have been summarized  
10 by Boschen and Casey<sup>25</sup>. One challenge with using the mobile phone as a platform for  
11 psychological treatment is that the user must be able to interact with the program in an easy way  
12<sup>25</sup>. Both BA and mindfulness are components in multi-component treatment packages, and as  
13 such they might be easier to target in smartphone applications than an entire treatment program  
14 would be, due to the need of simple and fast interaction with the treatment program. Another  
15 important feature of mobile technology is the possibility for the therapist to reach the patient  
16 outside of the therapy room or when not sitting in front of the computer, and thus create direct  
17 incentives for behavior change in the patient's everyday life<sup>25</sup>. Therefore, BA is a treatment that  
18 could benefit from the use of new mobile technologies (for example smartphones), even more  
19 than mindfulness, by creating direct incentives for BA in patient's everyday life.  
20  
21  
22  
23

24 In this study, we hypothesized that BA treatment delivered over smartphone would be more  
25 effective than mindfulness treatment delivered over smartphone with an expected between group  
26 effect size of Cohen's  $d=0.50$ . We also expected, in line with Dimidjian and coworkers'  
27 conclusions, that BA would be superior to mindfulness for participants suffering from more  
28 severe depression. The study was based on our previous work on guided internet-treatment for  
29 depression<sup>26</sup>, but in the current study the treatment content was delivered entirely via the  
30 participants' personal smartphone, using recently developed smartphone applications. The aim of  
31 this study was to test the effects of two smartphone-delivered treatments; one based on BA and  
32 the other on mindfulness. Hence, the main question is whether BA is more effective than  
33 mindfulness delivered over smartphone. In order to evaluate long-term effects, we also included  
34 a 6-month follow-up after the start of the treatment.  
35  
36  
37  
38

## 39 **Methods**

### 40 **Ethics statement**

41 The study was approved by the Regional Ethics Board of Linköping, Sweden. Written informed  
42 consent was obtained from all participants by surface mail.  
43  
44  
45  
46

### 47 **Recruitment and selection**

48 The participants were mainly recruited via mass media and advertisements in large Swedish  
49 newspapers. Those who were interested were directed to a web page with information about the  
50 study, the treatments being tested and how to participate in the study.  
51  
52  
53

54 Inclusion criteria for the study were a) being at least 18 years old, b) having a point total of  $\geq 5$  on  
55 PHQ-9, c) reported unchanged dosage of medication for depression and anxiety during the last  
56 month, d) not being in any concurrent psychological treatment, e) not suffering from a severe  
57 comorbid psychiatric condition that could interfere with the treatment (e.g. bipolar disorder or  
58  
59  
60

1  
2  
3 schizophrenia, assessed during a clinical interview), f) not having other primary medical  
4 problems which would need other treatments first hand, g) not having severe alcohol problems,  
5 h) no assessed risk of being suicidal (see below for details) and i) major depression according to  
6 the DSM-IV, with at least an episode in partial remission. The diagnosis of MDD was confirmed  
7 by a structured interview (see below). Additionally, an assessment of suicidal ideation was  
8 conducted. The interviews were made over telephone by four MSc clinical psychology students.  
9 The principal research executive reviewed all the protocols from the interviews together with the  
10 interviewers.  
11  
12

13  
14  
15 Of the 231 individuals who initially expressed interest in the study, 126 completed all the  
16 questions in the online screening (22 did not finish the screening and 83 did not begin the  
17 screening). Of these, 29 were excluded before the diagnostic interview started. The most  
18 common reason for exclusion was an ongoing psychological treatment. Other reasons for  
19 exclusion were wrong type of phone and score under 5 on the PHQ-9. 13 individuals were  
20 excluded after the diagnostic interview with the most common reason that the participants were  
21 judged to be in need of another kind of treatment. Eighty-four were subsequently included after  
22 the interview had been conducted. Before the study started, three participants chose not to  
23 participate in the study. Hence, 81 participants were finally included in the data analysis. The  
24 reasons for exclusion are specified in the flowchart found in Figure 1.  
25  
26

27  
28 [Insert Figure 1 about here]  
29  
30

31  
32 Among the randomized participants there were 70.3 % women ( $n=57$ ) and 29.6 % men ( $n=24$ ).  
33 The mean age was 36.0 years ( $SD=10.8$ ) ranging from 20 to 61 years. See Table 1 for additional  
34 demographical data.  
35  
36

### 37 Outcome measures

38  
39 **Primary outcome measures.** The primary outcome measures were the Beck Depression  
40 Inventory-II (BDI-II;<sup>27</sup>) and the 9-item Patient Health Questionnaire Depression Scale (PHQ-9;  
41 <sup>28 29</sup>) that were administered pre-treatment, at post-treatment and also six months after the  
42 treatment had ended. The PHQ-9 was also administered on a weekly basis during the entire  
43 treatment phase (8 weeks). Hence, there were three measurements on the outcome BDI-II and 10  
44 measurements on the outcome PHQ-9 (including pre-treatment, post-treatment and six months  
45 follow up).  
46  
47

48  
49 **Secondary outcome measures.** In addition to the BDI-II and PHQ-9, the Beck Anxiety  
50 Inventory (BAI;<sup>30</sup>), the Quality of Life Inventory (QOLI;<sup>31 32</sup>) and the Acceptance and Action  
51 Questionnaire (AAQ-II;<sup>33</sup>) were administered. The AAQ-II was administered on a weekly basis  
52 during the entire treatment phase (8 weeks). All other outcome measures were collected at pre-  
53 treatment, post-treatment and at 6-month after the start of the treatment. Hence, there were three  
54 measurements on the outcomes BAI and QOLI and 10 measurements on the outcome AAQ-II  
55 (including pre-treatment, post-treatment and six months follow up). All outcome measures used  
56 have been shown to have good psychometric properties, with internal consistencies of at least  
57  
58  
59  
60

1  
2  
3  $\alpha=.79$ . Details of this can be found in the respective references of the outcome questionnaires.  
4  
5

6  
7 **Clinician-administered measures.** Psychiatric diagnoses were assessed at pre-treatment, post-  
8 treatment and at 6-month after the start of the treatment, using the Mini-International  
9 Neuropsychiatric Interview (M.I.N.I.; <sup>34</sup>). The M.I.N.I. is a diagnostic interview that, in contrast  
10 to several other diagnostic interviews, is completely structured, making it appropriate for other  
11 assessors than experienced psychiatrists <sup>34</sup>. All interviews were made over telephone by the four  
12 psychology students described above, who at post-treatment were blind to participant's  
13 condition. At the 6-month follow-up, the interviews were conducted by other clinical psychology  
14 students who were blind to both the participant's condition and the treatment they had been  
15 given. Recovery rates were defined as no longer fulfilling the criteria for depression according to  
16 M.I.N.I.  
17  
18

19  
20 **Treatment credibility.** To measure participants' perceived treatment credibility, Borkovec and  
21 Nau's Credibility/expectancy scale (C-Scale)<sup>35</sup> was used. The C-scale measures the way in  
22 which participants view the logic of the treatment (credibility) and the improvements that can be  
23 achieved (expectancy) and includes five items on a 10-point scale. Assessment was made after  
24 the first week of treatment.  
25  
26

### 27 28 29 **Administration format of self-report measures**

30 We used an online platform to administer the BDI-II, PHQ-9, BAI, QOLI, AAQ-II and the C-  
31 scale. Previous psychometric research has validated internet-administration of self-rating scales  
32 for depression, quality of life and anxiety <sup>36-38</sup>.  
33  
34

### 35 36 **Procedure and design**

37 For those participants included in the study, the results from the online screening were used as  
38 pre-treatment assessment. After the recruitment, participants were allocated using an online  
39 randomization tool ([www.random.org](http://www.random.org)), handled by an independent person who was separate  
40 from the staff conducting the study.  
41  
42

### 43 44 **The interventions**

45 **Behavioral activation treatment.** An 8-week smartphone-based BA intervention with minimal  
46 therapist contact (maximum time of 20 minutes per participant and week) was developed by our  
47 research group. The intervention consisted of a short web-based psychoeducation, and a step-by-  
48 step behavior program administered via a smartphone application. The psychoeducation aimed to  
49 introduce the participants to the treatment, touching on topics like the prevalence of depression,  
50 its etiology and maintenance factors based on operant conditioning, as well as the theoretical  
51 basis for BA. The text in the web-based psychoeducation was written specially for the current  
52 intervention, but inspired by the BA treatment manuals of Martell et al. <sup>39</sup> and Lejuez, Hopko &  
53 Hopko <sup>40</sup>. In all, there were three chapters, totaling 11 pages of text, containing 3 893 words.  
54  
55  
56  
57  
58  
59  
60

1  
2  
3 The smartphone application was built as a native application for Iphone, meaning that the  
4 application was coded in a specific programming language (Objective C), and a mobile web  
5 application for other smartphones. See Figure 2 for a screenshot of the application. A prototype  
6 of the smartphone application was tested in a pilot study<sup>41</sup>. This prototype, however, was not  
7 specifically designed for depression interventions. The purpose of the BA application was to  
8 make it easy for the participant to remember and register important behaviors, in order to  
9 increase everyday activation. The application contained a database of 54 behaviors, divided into  
10 three different areas for the participant to add to their application. See Table 2 for the list of  
11 behaviors from the database. The database aimed to provide suggestions, help, and inspiration to  
12 get started with the application. Participants were also able to add their own areas and behaviors  
13 into the application to start tracking. Through the initial psychoeducation, the participants were  
14 guided to add few (between two and four) and easy behaviors from start, mainly from the  
15 database.  
16  
17  
18  
19

20  
21 When a behavior was completed, for example: *Get ready in the morning*, the participant could  
22 register this in the application and add a short reflection. Statistics and summaries of quantitative  
23 (i.e. behavior frequency) and qualitative data (i.e. reflections) were presented in the application  
24 for the participant.  
25  
26

27  
28 There was also a back-end system where all the quantitative and qualitative data from the  
29 participants was accessible for the therapist. From the back-end system, the therapist could send  
30 short text messages to the participants via a messaging system, similar to Short Message Service  
31 (SMS). The messaging system was used by the therapists (described below) to send personal  
32 encouraging messages every other or every third day to the participants, as well as weekly  
33 general educational messages. The system functioned as a one-way communication, meaning  
34 that the participants were not able to reply the messages. The participants were also told to write  
35 a reflection to summarize every week for their therapist and send it in via e-mail in the end of  
36 every treatment week. The participants received personal feedback on their reflection from their  
37 therapist via e-mail. No sensitive data was saved on a computer, in which the person providing  
38 data could be identified. In addition, all internet and smartphone activities were secured, with  
39 SSL-encrypted information.  
40  
41  
42  
43

44 [Insert Figure 2 about here]  
45  
46

47 **Mindfulness treatment.** The mindfulness intervention, also an 8-week smartphone-based  
48 intervention with minimal therapist contact (maximum time of 20 minutes per participant and  
49 week), consisted of a short web-based psychoeducation, and a step-by-step mindfulness practice  
50 program, administered via a smartphone application. The psychoeducation for the mindfulness  
51 intervention was equivalent to that of the BA intervention, except that the theoretical basis of  
52 mindfulness was presented instead of the theoretical basis of BA. The text was written specially  
53 for the current intervention, but inspired by the self help book *The Mindful Way Through*  
54 *Depression* by Williams et al.<sup>42</sup>. In all, there were three chapters, totaling 9 pages of text,  
55 containing 2 927 words.  
56  
57  
58  
59  
60

1  
2  
3  
4  
5 The smartphone application for Iphone was an established and commercially available  
6 application that could be downloaded from the Apple app store. See Figure 3 for a screenshot of  
7 the application. For other smartphones, a mobile web application was built especially for the  
8 current study with the aim of mimicking the Iphone application. The application consisted of a  
9 number of audio tracks with exercises to facilitate the practice of mindfulness. The exercises  
10 were both guided and unguided, and in short (three minutes) and long (30 minutes) format.  
11 Through the initial psychoeducation, the participants were guided to start with short mindfulness  
12 exercises, such as guided three minutes mindfulness exercise, which was one of the audio tracks  
13 in the application.  
14  
15

16  
17  
18 Since the mindfulness application did not have a communication function such as the BA  
19 application, e-mails were used to emulate the messaging system in the BA application. Hence,  
20 the therapists sent encouraging messages every other, or every third day to the participants, as  
21 well as weekly general educational messages via mail. The difference in how the therapists  
22 communicated in the mindfulness intervention, compared with the BA intervention, was that the  
23 therapists could not give specific feedback on activities or exercises that the participants had  
24 done. Otherwise, the communication was similar (length and type of guided content in the  
25 feedback). Additionally, the participants given the mindfulness intervention were also told to  
26 write a reflection to summarize every week for their therapist and send it in via e-mail. The  
27 participants received personal feedback on their reflection from their therapist.  
28  
29

30  
31 [Insert Figure 3 about here]  
32  
33

34  
35 **Therapists.** The therapists were four final-semester students from a five-year M.Sc. clinical  
36 psychologist program. All therapists had completed their clinical training as well as 16 weeks of  
37 internship. Each therapist was responsible for the treatment of 8 to 10 participants from the BA  
38 group and an equal number of participants from the mindfulness group. Therapists were  
39 randomly allocated to participants, with the restriction of not having more than 10 participants  
40 from each group. For the entire duration of the study the therapists received continuous  
41 supervision from an experienced psychotherapist with CBT orientation, who had previous  
42 experience of working with a BA treatment manual, as well as mindfulness in depression  
43 treatment.  
44  
45

#### 46 47 **Subgroups based on cut-off scores**

48  
49 All randomized participants were classified into groups of either high or low severity of  
50 depression. These classes were formed based on the cut-offs scores on the PHQ-9. The  
51 participants were considered to suffer from higher severity of depression if they scored  $\geq 10$  on  
52 PHQ-9 and if they fulfilled the criteria for an ongoing primary diagnosis of major depression of  
53 moderate character ( $n=51$ ). Participants, not fulfilling these criteria were considered to suffer  
54 from lower severity of depression ( $n=30$ ).  
55  
56  
57  
58  
59  
60

## Data analysis

All analyses were performed using SPSS 20 (SPSS, Inc., Chicago, IL). Independent *t*-tests and  $\chi^2$ -tests were used to test for group differences in demographics, pre-treatment data and in recovery rates. In order to adhere to the intention-to-treat principle, the continuous outcome variables were analyzed using mixed effects models, given their ability to handle missing data<sup>43</sup>. All analyses used Maximum Likelihood estimation. Random intercept models were selected for all measures. Differences between the BA treatment and the mindfulness treatment were primarily investigated by modeling interaction effects of group and time. For the PHQ-9 and the AAQ-II, where weekly measures were available, the covariance between the random intercept and slope was not significant, and therefore was not included in the model. Hence, a random intercept model was used also for these measures. Between-group differences at post-treatment were analyzed using independent *t*-tests. Power analysis indicated an 89 % chance of detecting a between-group effect size of  $d=0.60$  ( $\alpha$  level=0.05, one tailed). Within- and between-group effect sizes (Cohen's *d*) were calculated by dividing the differences in means by the pooled standard deviations<sup>44</sup>. This was done both from pre-measurements to post-measurements, and from pre-measurements to the 6-month follow up data.

## Results

The two groups did not differ significantly on any of the measures at pre-treatment ( $t=0.50$  to  $0.67$ ,  $df=79$ ,  $p=0.78$  to  $0.50$ ). See Table 3 for all outcome measurements at pre-treatment, post-treatment and at 6-month follow-up. Also, there was no significant difference in demographic characteristics between the groups according to chi-square analysis. See Table 1 for demographical data. The results will be presented in the following order: attrition and adherence, self-report inventories (including effect size) both for the whole sample and the subgroups, recovery rates and treatment credibility.

### Attrition and adherence

Of the 84 participants randomized, three participants decided not to participate in the study. Nine out of these 81 participants (11.1 %) did not provide post-treatment data with a distribution of four participants from the BA group and five participants from the mindfulness group. Six out of the 81 participants (totaling 7.4 %) were unreachable for the M.I.N.I. telephone interview and were classified as unimproved in the data analysis. In the 6-month follow-up, 69 participants from the two treatment groups (totaling 85.2 %) provided data on the self-report measures, with a distribution of 35 participants from the BA group and 34 participants from the mindfulness group. 59 participants (72.8 %) were reached for the M.I.N.I. telephone interview. Once again, those unreachable were classified as unimproved in the data analysis.

Adherence to treatment was defined as the number of weekly reflections the participants sent to their therapist. In order to be considered as a completed week, at least one reflection had to have been sent to the therapist during that week. Of the 81 participants, 57 (70 %) succeeded to adhere to all the eight weeks. Of these, 25 (63 %) were in the BA group and 32 (78 %) were in the mindfulness group. No significant difference in adherence was found between the two groups ( $\chi^2(N=81, df=1)=2.35, p=1.00$ ). In average, participants succeeded to adhere to six weeks

( $M=5.8$ ,  $SD=2.47$ ).

### Primary outcome measures

No significant interaction effects of group and time on the PHQ-9 and the BDI-II were found between the groups, neither from pre-treatment to post-treatment (PHQ-9: ( $F(1, 501.47)=.28$ ,  $p's=.60$ ); BDI-II: ( $F(1, 74.11)=.28$ ,  $p's=.60$ )), nor from pre-treatment to the 6-month follow up (PHQ-9: ( $F(1, 571.49)=.36$ ,  $p's=.55$ ); BDI-II: ( $F(1, 147.96)=.09$ ,  $p's=.77$ )). However, as evident from Table 3, large within-group effect sizes were found on PHQ-9 and BDI-II, between pre-treatment and post-treatment, as well as between pre-treatment to the 6-month follow up. This was the case for both the BA treatment and the mindfulness-treatment.

### Subgroup analyses

For the participants (total  $n=51$ , BA  $n=23$ , MF  $n=28$ ) suffering from high severity of depression ( $\geq 10$  on the PHQ-9 and an ongoing primary diagnosis of major depression of moderate character), a mixed-effects model analysis on the PHQ-9 revealed significant interaction effects of group and time in favor for the BA group from pre-treatment to 6-month follow-up, but not on pre-treatment to post-treatment. Thus, the results indicated a difference between the groups from pre-treatment to 6-month follow-up ( $F(1, 362.1)=5.2$ ,  $p's<.05$ ). As seen in Table 3, the effect size between the groups at 6-month follow-up was small (Cohen's  $d=0.47$ ; CI [-1.46, 2.40]). No difference between the groups from pre-treatment to post-treatment was found

For the more mildly depressed participants (total  $n=30$ , BA  $n=17$ , MF  $n=13$ ) there was a significant effect in favor of the mindfulness group from pre-treatment to 6-month follow-up on both the PHQ-9 ( $F(1, 69.3)=7.7$ ,  $p's<.01$ ) and the BDI-II ( $F(1, 53.60)=6.25$ ,  $p's<.05$ ). The effect sizes were, as evident from Table 3, large (PHQ-9: Cohen's  $d=0.98$ ; CI [-0.72, 2.68]; BDI-II: Cohen's  $d=1.21$ ; CI [-1.71, 4.13]). No difference between the groups from pre-treatment to post-treatment was found

### Secondary outcome measures

As evident from Table 3 no significant interaction effects were found on the secondary measures neither from pre-treatment to post-treatment (BAI: ( $F(1, 74.05)=1.30$ ,  $p's=.26$ ); AAQ-II: ( $F(1, 570.00)=.07$ ,  $p's=.79$ ); QOLI: ( $F(1, 76.43)=.106$ ,  $p's=.31$ )), nor from pre-treatment to the 6-month follow up (BAI: ( $F(1, 147.01)=.35$ ,  $p's=.56$ ); AAQ-II: ( $F(1, 639.00)=.11$ ,  $p's=.74$ ); QOLI: ( $F(1, 148.61)=.39$ ,  $p's=.53$ )). Nevertheless, as shown in table 3, medium to large within-group effect sizes were revealed on all secondary outcome measures. This was evident for both groups, and on pre-treatment to post-treatment, as well as on pre-treatment to the 6-month follow up.

### Recovery rates

There were no significant differences in recovery rates between the groups, neither at post-treatment nor at the 6-month follow-up. This was the case both when analyzing the whole sample as well as the subgroups. When analyzing the whole sample ( $n=81$ ), 73.5 % ( $n=25$ ) in the BA



group recovered after treatment, compared to 53.1 % ( $n=17$ ) in the mindfulness group ( $\chi^2(N=66, df=1)=2.97, p=.07$ ). At the 6-month follow-up, 30 out of 34 participants (88.2 %) from the BA group had recovered, and 26 out of 32 participants (81.3 %) from the mindfulness group had recovered ( $\chi^2(N=66, df=1)=.63, p=.33$ ).

When analyzing only the severe depressed participants, there was a tendency in favor for the BA group. Among the severely depressed participants, 73.9 % ( $n=17$ ) in the BA group recovered after treatment, compared to 50.0 % ( $n=14$ ) in the mindfulness group ( $\chi^2(N=51, df=1)=3.03, p=.07$ ). At the 6-month follow-up, 21 out of 23 participants (91.3 %) from the BA group had recovered, and 22 out of 28 participants (78.6 %) from the mindfulness group had recovered ( $\chi^2(N=51, df=1)=1.55, p=.20$ ).

Among the less severe depressed participants, 82.4 % ( $n=14$ ) in the BA group recovered after treatment, compared to 92.3 % ( $n=12$ ) in the mindfulness group ( $\chi^2(N=30, df=1)=.63, p=.41$ ). At the 6-month follow-up, the number of participants from the BA group that had recovered remained the same as in the post-measurement ( $n=14$ ). In the mindfulness group all participants ( $n=13$ ) from the mindfulness group had recovered at the 6-month follow-up ( $\chi^2(N=30, df=1)=2.549, p=.17$ ).

### Treatment credibility and therapist time

Treatment credibility ratings (C-scale) after one week of treatment showed that participants in both groups rated their respective treatment as credible. Out of a possible total of 50, the average scores were 31.9 ( $SD=7.1$ ) for the BA group and 32.1 ( $SD=7.8$ ) for the mindfulness group. There was no significant difference in treatment credibility between the two groups ( $t(78)=0.12, p=0.90$ ). Furthermore, treatment credibility did not correlate significantly with any of the outcome measures, either for all participants combined ( $r=0.13, p=0.27$ ), for the BA group ( $r=0.01, p=0.92$ ) or for the mindfulness group ( $r=.23, p=.18$ ).

The therapist time per participant and week varied depending on whether the participant had sent a reflection or not. The therapists reported a span between 2 and 18 minutes per week and participants. However, the therapist time did not differ between the two treatment groups.

## Discussion

The overall aim of this study was to evaluate and compare the effects of two smartphone-delivered treatments for people suffering from mild to moderate major depression; one based on BA and the other on mindfulness. Hence, the main question was whether BA is more effective than mindfulness delivered over smartphone. We hypothesized that BA treatment delivered over smartphone would be more effective than mindfulness treatment delivered over smartphone. We also expected that BA would be superior to mindfulness for participants suffering from more severe depression. When analyzing the whole sample as one entity, the result showed that the

1  
2  
3 two interventions did not differ significantly from one another; neither from pre-treatment to  
4 post-treatment, nor from pre-treatment to the 6-month follow-up on any of the outcome  
5 measures. Also, there were no significant differences in recovery rates between the groups,  
6 neither at post-treatment nor at the 6-month follow-up.  
7  
8

9  
10 This study also explored how different levels of initial depression severity could moderate  
11 response to the different interventions. All randomized participants were classified into either  
12 high or low severity of depression based on the cut-offs scores on the PHQ-9 and if they fulfilled  
13 the criteria for an ongoing primary diagnosis of major depression. For participants with higher  
14 severity of depression, the treatment based on BA was superior to the treatment based on  
15 mindfulness, as measured with PHQ-9. In contrast, for participants with lower initial severity,  
16 the treatment based on mindfulness worked better than the treatment based on BA, as measured  
17 with PHQ-9 and BDI-II.  
18  
19

20  
21 The result from the analysis of the higher severity participants is in line with Dimidjian et al's  
22 finding<sup>7</sup>. In contrast to the meta-analysis by Cuijpers et al<sup>24</sup>, Dimidjian et al<sup>7</sup> found that BA  
23 was comparable in efficacy to antidepressant medication, and more efficacious than cognitive  
24 therapy - but only among those patients who were more severely depressed. In line with this,  
25 Beck and colleagues<sup>45</sup> have long suggested that therapists should focus on behavioral strategies  
26 early in treatment when patients are more depressed and return to that emphasis later if patients  
27 start to worsen.  
28  
29

30  
31 The result from the analysis of the less severely depressed participants was unexpected to us.  
32 Although there is yet only initial evidence that mindfulness treatment is effective for acute or  
33 severely depressed<sup>46,47</sup>, mindfulness has proven to be effective for relapse prevention of  
34 recurrent depression<sup>20,48,49</sup>. A possible explanation to the results could be that there was a  
35 difference between the two treatment groups, although not significant, in the number of  
36 participants that were suffering from major depression. In the BA group 64.7% ( $n=11$ ) were  
37 diagnosed with major depression in the initial screening, compared to 30.8% ( $n=4$ ) in the  
38 mindfulness group ( $\chi^2(N=30, df=1)=3.39, p=.07$ ).  
39  
40  
41

42 Moreover, the results showed significant improvements from pre-treatment to post-treatment on  
43 the primary outcome measures in both treatment conditions with large within-group effect sizes  
44 and large recovery rates, which are comparable to other depression treatment. This might  
45 indicate that this smartphone format could work well for a depressed population. However, a  
46 replication with a waiting list group should be conducted to rule out that the effects occurred due  
47 to natural recovery.  
48  
49

## 50 51 **Limitations**

52 There are a number of limitations that need to be mentioned. The first is that no wait list group  
53 was included. Even if our main research question was to assess whether behavioral activation is  
54 more effective than mindfulness delivered over smartphone a control group would have yielded a  
55 more clear result.  
56  
57  
58  
59  
60

1  
2  
3 A second limitation is that the study was underpowered. Thus, it is difficult to detect significant  
4 overall differences between the two smartphone-treatments, even if significant interaction effects  
5 were found when using mixed effects models with PHQ-9 in the subgroup analyses. A post-hoc  
6 power analysis revealed that a sample of 393 participants was required to detect small between-  
7 group effects. We were not expecting that the mindfulness treatment would be as effective and  
8 powered the trial as if a moderate between-group effect would be found.  
9

10  
11 A third limitation was that the participants were recruited nationally through mass media and  
12 advertisements. Thus, we cannot be sure that this treatment would work in a clinical setting, e.g.  
13 an outpatient psychiatric facility. However, mean depression severity as measured by the BDI-II  
14 at intake ( $M=24.10$ ) is rather close to the limit of 29 proposed for defining severe depression<sup>27</sup>,  
15 meaning that the depression severity in this study was comparable to an outpatient psychiatric  
16 population.  
17

18  
19 Fourth, we recruited a broad range of participants, with regards to the severity of depression (a  
20 minimum of 8 and a maximum of 44 on BDI-II at intake). This makes it difficult to target a  
21 specific group for whom the treatments would be effective. Nevertheless, a subgroup analysis  
22 showed that participants with higher severity of depression responded to the BA significantly  
23 better than the treatment based on mindfulness, whereas the treatment based on mindfulness  
24 worked significantly better than the treatment based on BA for the participants with lower initial.  
25 Additionally, it can be argued that these broad inclusion criteria reflect a real population (i.e. an  
26 outpatient psychiatric population) of individuals with depressive disorders.  
27  
28

29  
30 A fifth related concern was the large number of participants who had college- or university level  
31 education (65.5 %). This might bias generalizability of the results, since it is possible that guided  
32 self-help is especially well suited for educated clients. However, there are data indicating that 50  
33 % of patients seeking psychotherapy have some college education<sup>50</sup> and that educated patients  
34 may be more inclined to seek help for mental health problems in general<sup>51</sup>.  
35  
36

## 37 38 **Conclusion**

39  
40 Some clinical implications of this study are discussed as follows. Due to the need for simple and  
41 fast interaction with the treatment program, singular treatment components such as BA and  
42 mindfulness might be a better target for smartphone applications than entire multi-component  
43 treatment packages. At the same time, there is a need for guided self-help treatments distributed  
44 digitally that can reach out to more patients. This study is one of the first to test a treatment for  
45 depression, administered via smartphone. The large within-group effects on the primary outcome  
46 measures, as well as the large recovery rates for both groups are comparable to other depression  
47 treatments, and indicate that this smartphone format with a small amount of text and minimal  
48 therapist support, might work well for a depressed population. However, as mentioned above, a  
49 replication with a waiting list group should be conducted to rule out that the effects occurred due  
50 to natural recovery.  
51  
52

53  
54  
55 Moreover, this study also shows that BA might work better for a more severely depressed  
56 population, whereas mindfulness might work better for people suffering from light depression.  
57 These results suggest that different treatments distributed digitally can target different subgroups  
58  
59  
60

1  
2  
3 of depression in terms of severity. However, more studies are needed to strengthen this  
4 hypothesis before a conclusion can be drawn.  
5  
6

7 From a broader perspective, we believe that smartphones will be integrated even further in  
8 society since they are already socially accepted as well as relatively cheap for the functionalities  
9 you get <sup>25</sup>, and therefore may serve an important role in health care. Therefore these results,  
10 showing that mild to moderate major depression can be treated effectively by means of a  
11 supported smartphone-application, might be important in the future of making depression  
12 treatment and other psychological treatment more assimilated into people's daily life. As  
13 suggested in Ly et al. (2012), the smartphone format might also help increasing the awareness of  
14 being in treatment in everyday settings, and therefore better help clients create direct incentives  
15 for treatment related activities in their everyday life <sup>41</sup>. Using smartphones to distribute  
16 psychological treatment might also help making it possible to reach out with psychological  
17 therapy to a broader group of people, since their use attracts no attention <sup>25</sup>, allowing users to  
18 interact with a device without fear of judgment or stigma. Lastly, psychological treatments  
19 distributed via smartphones are not only relevant for Swedish conditions but also for the  
20 developing countries in the world, which increasingly are empowered by mobile phones with  
21 internet connection.  
22  
23  
24  
25

26 This study might open up for a broad range of other trials conducted via smartphones, both for  
27 self-help interventions as well as adjunct tools in face-to-face treatments. We believe that a  
28 substantial part of internet-based interventions in the future will be executed through  
29 smartphones or at least supported by smartphones. Further studies should focus on both formats,  
30 as well as expanding the treatment platform to other psychological disorders.  
31  
32  
33  
34  
35  
36  
37  
38  
39  
40  
41  
42  
43  
44  
45  
46  
47  
48  
49  
50  
51  
52  
53  
54  
55  
56  
57  
58  
59  
60

## Trial registration

Clinical Trials NCT01463020

## Competing interests

A related version of the BA application is currently developed for the open market by KHL.

## Authors' contributions

KHL was the project manager and has developed the application. KHL also participated in the drafting of the treatment manuals, and participated in analysis and interpretation of data. GA was the principal research executive and participated in the conception of the study and its design. GA also participated in the drafting of treatment manuals, analysis and interpretation of data, and performed statistical analysis. PC participated in the conception of the study and its design. RJ participated in analysis and interpretation of data, and performed statistical analysis. AT, LJ, SM and TW participated in the drafting of treatment manuals and performed the treatments. KHL and GA drafted the current manuscript. PC and RJ participated in revision of the current manuscript. All authors read and approved the final manuscript.

## Trial protocol

The full trial protocol can be found at: <http://www.trialsjournal.com/content/13/1/62>

## Funding

The Swedish Research Council sponsored this study with funding. 2011-2476

## References

1. Ebmeier K, Donaghey C, Steele J. Recent developments and current controversies in depression. *Lancet* 2006;367:153 - 67.
2. Smit F, Cuijpers P, Oostenbrink J, Batelaan N, de Graaf R, Beekman A. Costs of nine common mental disorders: implications for curative and preventive psychiatry. *J Ment Health Policy Econ* 2006;9:193 - 200.
3. Cuijpers P, van Straten A, Andersson G, van Oppen P. Psychotherapy for depression in adults: a meta-analysis of comparative outcome studies. *J Consult Clin Psychol* 2008;76(6):909-22.
4. Cuijpers P, van Straten A, Warmerdam L. Behavioral activation treatments of depression: a meta-analysis. *Clin Psychol Rev* 2007;27:318 - 26.
5. Dimidjian S, Barrera M, Martell C, Munoz R, Lewinsohn P. The origins and current status of behavioral activation treatments for depression. *Annu Rev Clin Psych* 2011;7:1 - 38.
6. Jacobson N, Dobson K, Truax P, Addis M, Koerner K, Gollan J, et al. A component analysis of cognitive-behavioral treatment for depression. *J Consult Clin Psych* 1996;64:295 - 304.
7. Dimidjian S, Hollon SD, Dobson KS, Schmalzing KB, Kohlenberg RJ, Addis ME, et al. Randomized trial of behavioral activation, cognitive therapy, and antidepressant medication in the acute treatment of adults with major depression. *J Consult Clin Psychol* 2006;74(4):658-70.
8. Andrews G, Cuijpers P, Craske MG, McEvoy P, Titov N. Computer Therapy for the Anxiety and Depressive Disorders Is Effective, Acceptable and Practical Health Care: A Meta-Analysis. *PLoS ONE* 2010;5(10):e13196.
9. Cuijpers P, Donker T, van Straten A, Li J, Andersson G. Is guided self-help as effective as face-to-face psychotherapy for depression and anxiety disorders? A systematic review and meta-analysis of comparative outcome studies. *Psychol Med* 2010;40(12):1943-57.
10. Carlbring P, Hagglund M, Luthstrom A, Dahlin M, Kadowaki A, Vernmark K, et al. Internet-based behavioral activation and acceptance-based treatment for depression: A randomized controlled trial. *Journal of affective disorders* 2013;148(2-3):331-7.
11. Andersson G. Using the Internet to provide cognitive behaviour therapy. *Behav Res Ther* 2009;47(3):175-80.
12. Rizvi SL, Dimeff LA, Skutch J, Carroll D, Linehan MM. A pilot study of the DBT coach: an interactive mobile phone application for individuals with borderline personality disorder and substance use disorder. *Behav Ther* 2011;42(4):589-600.
13. Watts S, Mackenzie A, Thomas C, Griskaitis A, Mewton L, Williams A, et al. CBT for depression: a pilot RCT comparing mobile phone vs. computer. *BMC psychiatry* 2013;13:49.
14. Segal ZV, Williams JMG. *Mindfulness-based cognitive therapy for depression*: Guilford Press, 2012.
15. Linehan M. *Cognitive-behavioral treatment of borderline personality disorder*: The Guilford Press, 1993.
16. Hayes SC, Strosahl KD, Wilson KG. *Acceptance and commitment therapy: An experiential approach to behavior change*: Guilford Press New York, 2003.
17. Cash M, Whittingham K. What facets of mindfulness contribute to psychological well-being and depressive, anxious, and stress-related symptomatology? *Mindfulness* 2010;1(3):177-82.
18. Brown KW, Ryan RM. The benefits of being present: mindfulness and its role in psychological well-being. *J Pers Soc Psychol* 2003;84(4):822-48.
19. Hofmann SG, Sawyer AT, Witt AA, Oh D. The effect of mindfulness-based therapy on anxiety and depression: A meta-analytic review. *J Consult Clin Psychol* 2010;78(2):169-83.

20. Piet J, Hougaard E. The effect of mindfulness-based cognitive therapy for prevention of relapse in recurrent major depressive disorder: a systematic review and meta-analysis. *Clinical psychology review* 2011;31(6):1032-40.
21. Hofmann SG, Sawyer AT, Witt AA, Oh D. The effect of mindfulness-based therapy on anxiety and depression: A meta-analytic review. *Journal of consulting and clinical psychology* 2010;78(2):169.
22. Ljotsson B, Hedman E, Lindfors P, Hursti T, Lindefors N, Andersson G, et al. Long-term follow-up of internet-delivered exposure and mindfulness based treatment for irritable bowel syndrome. *Behav Res Ther* 2011;49(1):58-61.
23. Fournier JC, DeRubeis RJ, Hollon SD, Dimidjian S, Amsterdam JD, Shelton RC, et al. Antidepressant drug effects and depression severity: a patient-level meta-analysis. *JAMA* 2010;303(1):47-53.
24. Cuijpers P, Andersson G, Donker T, van Straten A. Psychological treatment of depression: results of a series of meta-analyses. *Nord J Psychiatry* 2011;65(6):354-64.
25. Boschen M, Casey L. The use of mobile telephones as adjuncts to cognitive behavioral psychotherapy. *Prof Psychol-Res Pr* 2008;39:546 - 52.
26. Andersson G, Bergstrom J, Hollandare F, Carlbring P, Kaldø V, Ekselius L. Internet-based self-help for depression: randomised controlled trial. *The British journal of psychiatry : the journal of mental science* 2005;187:456-61.
27. Beck AT, Steer RA, Brown BK. *Beck Depression Inventory manual*, 1996.
28. Titov N, Dear BF, McMillan D, Anderson T, Zou J, Sunderland M. Psychometric Comparison of the PHQ-9 and BDI-II for Measuring Response during Treatment of Depression. *Cognitive Behaviour Therapy* 2011;40(2):126-36.
29. Kroenke K, Spitzer R, Williams J. The PHQ-9: validity of a brief depression severity measure. *J Gen Intern Med* 2001;16:606 - 13.
30. Beck A, Epstein N, Brown G, Steer R. An inventory for measuring clinical anxiety: psychometric properties. *J Consult Clin Psych* 1988;56:893 - 97.
31. Lindner PA, G.; Ost, L.-G.; Carlbring, P. Validation of the Internet-administered Quality of Life Inventory (QOLI) in different psychiatric conditions. *Cognitive Behaviour Therapy* in press.
32. Frisch M, Cornell J, Villanueva M. Clinical validation of the Quality of life inventory: a measure of life satisfaction for use in treatment planning and outcome assessment. *Psychol Assessment* 1992;4:92 - 101.
33. Hayes S, Strosahl K, Bunting K, Twohig M, Wilson K. What is Acceptance and Commitment Therapy? *A Practical Guide to Acceptance and Commitment Therapy* 2004:1 - 30.
34. Sheehan DV, Lecrubier Y, Sheehan KH, Amorim P, Janavs J, Weiller E, et al. The Mini-International Neuropsychiatric Interview (M.I.N.I.): the development and validation of a structured diagnostic psychiatric interview for DSM-IV and ICD-10. *J Clin Psychiatry* 1998;59 Suppl 20:22-33;quiz 34-57.
35. Borkovec TD, Nau SD. Credibility of analogue therapy rationales. *Journal of Behavior Therapy and Experimental Psychiatry* 1972;3(4):257-60.
36. Carlbring P, Brunt S, Bohman S, Austin D, Richards J, Vñst L-Gr, et al. Internet vs. paper and pencil administration of questionnaires commonly used in panic/agoraphobia research. *Computers in Human Behavior* 2007;23(3):1421-34.
37. Hedman E, Ljotsson Bn, Rvøck C, Furmark T, Carlbring P, Lindefors N, et al. Internet administration of self-report measures commonly used in research on social anxiety disorder: A psychometric evaluation. *Computers in Human Behavior* 2010;26(4):736-40.
38. Hollandare F, Andersson G, Engstrom I. A comparison of psychometric properties between internet and paper versions of two depression instruments (BDI-II and MADRS-S) administered to clinic patients. *J Med Internet Res* 2010;12(5):e49.

- 1  
2  
3 39. Martell CR, Addis ME, Jacobson NS. *Depression in context: Strategies for guided action*: WW Norton  
4 & Co, 2001.  
5  
6 40. Lejuez CW, Hopko DR, Hopko SD. A brief behavioral activation treatment for depression treatment  
7 manual. *Behavior Modification* 2001;25(2):255-86.  
8 41. Ly K, Dahl J, Carlbring P, Andersson G. Development and initial evaluation of a smartphone  
9 application based on acceptance and commitment therapy. *SpringerPlus* 2012;1(1):11.  
10 42. Williams JMG, Teasdale JD, Segal ZV. *The mindful way through depression: Freeing yourself from*  
11 *chronic unhappiness*: The Guilford Press, 2007.  
12 43. Gueorguieva R, Krystal JH. Move over ANOVA: progress in analyzing repeated-measures data and its  
13 reflection in papers published in the Archives of General Psychiatry. *Arch Gen Psychiatry*  
14 2004;61(3):310-7.  
15  
16 44. Borenstein M, Hedges LV, Higgins JP, Rothstein HR. *Introduction to meta-analysis*: Wiley, 2011.  
17 45. Beck AT. *Cognitive therapy of depression*: The Guilford Press, 1979.  
18 46. Manicavasgar V, Parker G, Perich T. Mindfulness-based cognitive therapy vs cognitive behaviour  
19 therapy as a treatment for non-melancholic depression. *J Affect Disord* 2011;130(1-2):138-44.  
20 47. Kenny MA, Williams JM. Treatment-resistant depressed patients show a good response to  
21 Mindfulness-based Cognitive Therapy. *Behav Res Ther* 2007;45(3):617-25.  
22 48. *Psykologisk behandling vid depression : teorier, terapimetoder och forskning A1 - Andersson, Gerhard*  
23 *Y1 - 2012*.  
24 49. Andersson G. *Psykologisk behandling vid depression: teorier, terapimetoder och forskning*. 2012.  
25 50. Vessey JT, Howard KI. Who seeks psychotherapy? *Psychotherapy: Theory, Research, Practice,*  
26 *Training* 1993;30(4):546.  
27 51. Howard KI, Cornille TA, Lyons JS, Vessey JT. Patterns of mental health service utilization. *Archives of*  
28 *General Psychiatry* 1996.  
29  
30  
31  
32  
33  
34  
35  
36  
37  
38  
39  
40  
41  
42  
43  
44  
45  
46  
47  
48  
49  
50  
51  
52  
53  
54  
55  
56  
57  
58  
59  
60



**Table 1.** Demographic description of the participants at randomization.

|                                           |                             | <b>Behavioral activation<br/>(N = 40)</b> | <b>Mindfulness<br/>(N = 41)</b> | <b>Total<br/>(N = 81)</b> |
|-------------------------------------------|-----------------------------|-------------------------------------------|---------------------------------|---------------------------|
| <b>Age</b>                                | Mean (SD)                   | 36.6 (10.5)                               | 35.6 (11.3)                     | 36.1 (10.8)               |
|                                           | Min-Max                     | 20-59                                     | 21-61                           | 20-61                     |
| <b>Gender</b>                             | Female                      | 28 (70 %)                                 | 29 (70.7 %)                     | 57 (70 %)                 |
|                                           | Male                        | 12 (30 %)                                 | 12 (29.3 %)                     | 24 (30 %)                 |
| <b>Marital status</b>                     | Single                      | 15 (37.5 %)                               | 15 (36.6 %)                     | 30 (37 %)                 |
|                                           | Married                     | 19 (47.5 %)                               | 24 (58.6 %)                     | 43 (53.2 %)               |
|                                           | Divorced/widow/widower      | 5 (12.5 %)                                | 1 (2.4 %)                       | 6 (7.4 %)                 |
|                                           | Other                       | 1 (2.5 %)                                 | 1 (2.4 %)                       | 2 (2.4 %)                 |
| <b>Highest educational level</b>          | Nine year compulsory school | 1 (2.5 %)                                 | 2 (4.9 %)                       | 3 (3.8 %)                 |
|                                           | Secondary school            | 11 (27.5 %)                               | 14 (34.1 %)                     | 25 (30.9 %)               |
|                                           | College/university          | 27 (67.5 %)                               | 24 (58.5 %)                     | 51 (63 %)                 |
|                                           | Other                       | 1 (2.5 %)                                 | 1 (2.4 %)                       | 2 (2.5 %)                 |
| <b>Employment status</b>                  | Employed/student            | 35 (87.5 %)                               | 30 (73.2 %)                     | 65 (80.2 %)               |
|                                           | Unemployed                  | 3 (7.5 %)                                 | 3 (7.3 %)                       | 6 (7.4 %)                 |
|                                           | Retired                     | 0 (0 %)                                   | 1 (2.4 %)                       | 1 (1.2 %)                 |
|                                           | Other                       | 2 (6.3 %)                                 | 7 (17.1 %)                      | 9 (11.1 %)                |
| <b>Type of Smartphone</b>                 | Iphone                      | 24 (60 %)                                 | 23 (56.1 %)                     | 47 (58 %)                 |
|                                           | Android                     | 16 (40 %)                                 | 18 (43.9 %)                     | 34 (42 %)                 |
| <b>Medication</b>                         | Yes, earlier                | 10 (25 %)                                 | 13 (31.7 %)                     | 23 (28.4 %)               |
|                                           | Yes, present                | 12 (30 %)                                 | 14 (34.1 %)                     | 26 (32.1 %)               |
|                                           | None                        | 18 (45 %)                                 | 14 (34.1 %)                     | 32 (39.5 %)               |
| <b>Psychological treatment</b>            | Yes, earlier                | 19 (47.5 %)                               | 23 (56.1 %)                     | 42 (51.9 %)               |
|                                           | None                        | 21 (52.5 %)                               | 18 (43.9 %)                     | 39 (48.1 %)               |
| <b>Experience of self-help literature</b> | Yes                         | 12 (30 %)                                 | 13 (31.7 %)                     | 25 (30.9 %)               |
|                                           | None                        | 28 (70 %)                                 | 28 (68.3 %)                     | 56 (69.1 %)               |
| <b>Diagnosis</b>                          | Depression                  | 34 (85 %)                                 | 32 (78 %)                       | 66 (82.5 %)               |
|                                           | With dysthymia              | 22 (55 %)                                 | 18 (44 %)                       | 40 (49 %)                 |
|                                           | Earlier episodes            | 31 (77.5 %)                               | 34 (83 %)                       | 65 (80 %)                 |
|                                           | Panic disorder              | 1 (2.5 %)                                 | 3 (7.5 %)                       | 4 (5 %)                   |
|                                           | Social phobia               | 6 (15 %)                                  | 7 (17 %)                        | 13 (16 %)                 |
|                                           | GAD                         | 19 (47.5 %)                               | 10 (24.5 %)                     | 29 (36 %)                 |

**Table 2.** List of behaviors in the database.

**Everyday structure**

1  
2  
3  
4  
5 Get out of bed when the bell rings in the morning  
6 Take a shower  
7 Get ready in the morning  
8 Eat breakfast  
9 Read the newspaper  
10 Make a meal plan for each day of the week  
11 Make a shopping list for meals  
12 Buy food for the meals you have planned  
13 Prepare a simple meal  
14 Clean a part of my home  
15 Clean at least 15 minutes  
16 Washing dishes immediately after a meal  
17 Wash my clothes  
18 Plan my TV viewing from TV schedules  
19 Turn off the TV before 21:00 if I'm still watching TV  
20 Turn off the computer before 21:00 if I'm still on the Internet  
21 Take a brisk walk for 10 minutes  
22 Log in to my online banking and pay a bill  
23 Entering my weekly activities in my calendar  
24

**Social behaviors**

25 Texting a friend and ask what he / she does  
26 Call a friend and ask what the situation is  
27 Take a walk with a friend  
28 Book a meeting with someone in my family  
29 Suggest a coffee with a friend or family member  
30 Suggest a lunch with a friend or family member  
31 Go to the playground with my kids  
32 Bake something with my children  
33 Meet a friend in the evening and ask how your day was  
34 Watching an episode of a TV series with a friend  
35 Go to the movies with a friend  
36 Cooking with someone  
37

**New activities**

38 Buy or borrow a book I wanted to read  
39 Read at least 20 minutes out of a book  
40 Go to a new cafe and coffee  
41 Look up the nearest training center is  
42 Read on about training online  
43 Post a workout plan for the week  
44 Ask a friend if he / she wants to come along and train  
45 Spend at least 30 minutes of physical activity  
46 Listen to a radio program  
47 Watch a documentary on TV  
48 Eat a good meal out  
49 Write down at least two good things that happened around me  
50 Rent a movie and have a night in  
51 Look up the exhibits that are in my city  
52 See an exhibition at a museum  
53 Look up the concerts that are relevant right now  
54 Go to a concert  
55 Look up current things happening in my city  
56 Attend a church service  
57 Solve a crossword  
58 Make a Sudoku  
59 Listen to music without doing anything else and focus on what I hear  
60 Go to town and buy something nice for myself

**Table 3.** Means, SDs and effect sizes (Cohen's d) for measures of depression, anxiety, psychological flexibility and quality of life.

| Outcome measure | Mean (SD)     |                |                   | Effect size, <i>d</i> (95% CI) |                        |                        |                       |
|-----------------|---------------|----------------|-------------------|--------------------------------|------------------------|------------------------|-----------------------|
|                 | Pre-treatment | Post-treatment | 6-month follow-up | Between-group, pre-post        | Between-group, pre-6FU | Within-group, pre-post | Within-group, pre-6FU |
| Total           |               |                |                   |                                |                        |                        |                       |
| BDI-II          |               |                |                   |                                |                        |                        |                       |
| BA              | 23.50 (7.85)  | 10.89 (5.92)   | 12.71 (10.56)     | 0.25                           | 0.03                   | 1.83 (0.27-3.38)**     | 1.19 (-0.87-3.24)**   |
| MF              | 24.68 (9.47)  | 12.94 (10.18)  | 13.09 (12.24)     | (-1.65-2.15)                   | (-2.63-2.69)           | 1.21 (-0.95-3.38)**    | 1.09 (-1.32-3.50)**   |
| PHQ-9           |               |                |                   |                                |                        |                        |                       |
| BA              | 12.53 (4.43)  | 5.83 (3.85)    | 6.77 (5.83)       | 0.28                           | 0.15                   | 1.63 (0.71-2.56)**     | 1.14 (-0.01-2.28)**   |
| MF              | 13.22 (4.81)  | 7.19 (5.84)    | 7.74 (7.33)       | (-0.85-1.40)                   | (-1.39-1.69)           | 1.15 (-0.02-2.32)**    | 0.91 (-0.44-2.27)**   |
| BAI             |               |                |                   |                                |                        |                        |                       |
| BA              | 14.60 (9.09)  | 8.81 (5.77)    | 8.34 (8.50)       | 0.06                           | 0.01                   | 0.76 (-0.95-2.47)**    | 0.72 (-1.25-2.69)**   |
| MF              | 13.51 (9.31)  | 9.22 (7.68)    | 8.38 (7.48)       | (-1.49-1.61)                   | (-1.86-1.87)           | 0.51 (-1.39-2.40)**    | 0.61 (-1.30-2.51)**   |
| AAQ-II          |               |                |                   |                                |                        |                        |                       |
| BA              | 27.28 (7.05)  | 21.22 (8.24)   | 20.09 (9.28)      | 0.22                           | 0.10                   | 0.80 (-0.89-2.50)**    | 0.89 (-0.93-2.72)**   |
| MF              | 28.22 (7.09)  | 23.32 (10.82)  | 21.03 (9.68)      | (-1.97-2.41)                   | (-2.10-2.31)           | 0.56 (-1.44-2.54)*     | 0.87 (-1.00-2.74)**   |
| QoLI            |               |                |                   |                                |                        |                        |                       |
| BA              | -0.45 (1.38)  | 0.92 (1.66)    | 1.15 (2.40)       | 0.05                           | 0.01                   | 0.91 (0.58-1.25)**     | 0.84 (0.41-1.27)**    |
| MF              | -0.20 (1.51)  | 0.84 (1.90)    | 1.13 (2.07)       | (-0.36-0.45)                   | (-0.53-0.51)           | 0.62 (0.24-0.99)**     | 0.75 (0.36-1.15)**    |
| H-L Dep         |               |                |                   |                                |                        |                        |                       |
| BDI-II          |               |                |                   |                                |                        |                        |                       |
| BA              | 26.87 (7.14)  | 12.00 (6.31)   | 11.81 (10.63)     | 0.42                           | 0.39                   | 2.25 (0.33-4.18)**     | 1.72 (-0.87-4.31)**   |
| MF              | 28.00 (8.61)  | 15.68 (10.76)  | 16.28 (12.71)     | (-2.09-2.93)                   | (-2.95-3.73)           | 1.62 (-0.44-3.67)**    | 1.32 (-1.07-3.71)**   |
| PHQ-9           |               |                |                   |                                |                        |                        |                       |
| BA              | 15.52 (3.29)  | 6.64 (4.42)    | 6.48 (5.59)       | 0.36                           | 0.47                   | 2.34 (1.23-3.45)**     | 2.04 (0.73-3.35)**    |
| MF              | 15.57 (3.35)  | 8.60 (6.29)    | 9.60 (7.71)       | (-1.17-1.90)                   | (-1.46-2.40)*          | 1.43 (0.13-2.74)**     | 1.05 (-0.49-2.58)**   |
| BAI             |               |                |                   |                                |                        |                        |                       |
| BA              | 17.43 (9.37)  | 9.18 (6.68)    | 9.62 (8.91)       | 0.20                           | 0.01                   | 1.03 (-1.30-3.37)**    | 0.87 (-1.77-3.52)**   |
| MF              | 15.57 (9.39)  | 10.68 (8.39)   | 9.72 (7.91)       | (-1.94-2.34)                   | (-2.36-2.38)           | 0.56 (-1.80-2.92)*     | 0.68 (-1.62-2.99)**   |
| AAQ-II          |               |                |                   |                                |                        |                        |                       |
| BA              | 28.27 (7.21)  | 21.68 (8.90)   | 19.33 (9.27)      | 0.44                           | 0.47                   | 0.83 (-1.47-3.14)**    | 1.11 (-1.28-3.49)**   |
| MF              | 29.04 (6.50)  | 25.87 (10.52)  | 23.56 (9.33)      | (-2.30-3.18)                   | (-2.16-3.09)           | 0.38 (-1.90-2.65)      | 0.70 (-1.40-2.80)*    |
| QoLI            |               |                |                   |                                |                        |                        |                       |
| BA              | -0.51 (1.30)  | 0.78 (1.58)    | 1.25 (2.07)       | 0.26                           | 0.34                   | 0.91 (0.50-1.33)**     | 1.05 (0.56-1.55)**    |
| MF              | -0.71 (1.18)  | 0.38 (1.58)    | 0.53 (2.23)       | (-0.70-0.18)                   | (-0.95-0.27)           | 0.80 (0.44-1.17)**     | 0.72 (0.26-1.18)**    |
| L-L Dep         |               |                |                   |                                |                        |                        |                       |
| BDI-II          |               |                |                   |                                |                        |                        |                       |
| BA              | 18.94 (6.47)  | 9.14 (4.96)    | 14.07 (10.71)     | -0.51                          | -1.21                  | 1.74 (-0.25-3.72)**    | 0.58 (-2.36-3.52)     |
| MF              | 17.54 (7.09)  | 6.73 (4.86)    | 4.22 (3.63)       | (-2.36-1.34)                   | (-4.13-1.71)*          | 1.83 (-0.54-4.19)**    | 2.35 (-0.03-4.72)**   |
| PHQ-9           |               |                |                   |                                |                        |                        |                       |
| BA              | 8.47 (1.59)   | 4.57 (2.34)    | 7.21 (6.36)       | -0.23                          | -0.98                  | 2.06 (1.39-2.72)**     | 0.30 (-1.21-1.80)     |
| MF              | 8.15 (3.34)   | 4.00 (2.86)    | 2.56 (1.51)       | (-1.20-0.74)                   | (-2.68-0.72)**         | 1.38 (0.19-2.59)**     | 2.13 (1.03-3.23)**    |
| BAI             |               |                |                   |                                |                        |                        |                       |
| BA              | 10.76 (7.33)  | 8.21 (4.10)    | 6.43 (7.80)       | -0.56                          | -0.27                  | 0.43 (-1.64-2.51)      | 0.59 (-1.98-3.16)     |
| MF              | 9.08 (7.70)   | 5.91 (4.48)    | 4.67 (4.64)       | (-2.17-1.04)                   | (-2.92-2.38)           | 0.51 (-1.95-2.98)      | 0.67 (-1.95-3.34)**   |
| AAQ-II          |               |                |                   |                                |                        |                        |                       |
| BA              | 26.00 (6.85)  | 20.50 (7.34)   | 21.21 (9.54)      | -0.37                          | -0.87                  | 0.80 (-1.61-3.21)**    | 0.61 (-2.17-3.39)     |
| MF              | 26.46 (8.21)  | 17.52 (9.54)   | 14.00 (7.07)      | (-3.52-2.78)                   | (-4.26-2.52)           | 1.06 (-2.33-4.44)*     | 1.68 (-1.42-4.78)**   |
| QoLI            |               |                |                   |                                |                        |                        |                       |
| BA              | -0.37 (1.52)  | 1.14 (1.83)    | 0.97 (2.15)       | -0.38                          | -0.93                  | 0.94 (0.37-1.50)**     | 0.76 (0.13-1.38)*     |
| MF              | 0.89 (1.61)   | 1.87 (2.24)    | 2.87 (2.10)       | (-0.38-1.14)                   | (-1.77-0.10)           | 0.53 (-0.20-1.27)      | 1.14 (0.41-1.87)      |

Abbreviations: BA: Behavioral activation; MF: Mindfulness; H-L Dep: High-level depression; L-L Dep: Low-level depression; BDI-II: Beck Depression Inventory-II; PHQ-9: 9-item Patient Health Questionnaire Depression Scale; BAI: Beck Anxiety Inventory; AAQ-II: Acceptance and Action Questionnaire; QOLI: Quality of Life Inventory.

\*  $p < 0.05$ .

\*\*  $p < 0.01$ .

## Behavioral activation vs. Mindfulness-based guided self-help treatment administered through a smartphone application: a randomized controlled trial

Kien Hoa Ly<sup>§</sup>, Anna Trüschel<sup>1</sup>, Linnea Jarl<sup>1</sup>, Susanna Magnusson<sup>1</sup>, Tove Windahl<sup>1</sup>, Robert Johansson<sup>1</sup>, Per Carlbring<sup>2</sup>, Gerhard Andersson<sup>1,3</sup>

<sup>1</sup> Department of Behavioral Sciences and Learning, Linköping University, Linköping, Sweden

<sup>2</sup> Department of Psychology, Stockholm University, Stockholm, Sweden

<sup>3</sup> Department of Clinical Neuroscience, Center for Psychiatry Research, Karolinska Institutet, Stockholm, Sweden

<sup>§</sup> Corresponding author

Email addresses:

KHL: kien.hoa.ly@liu.se

AT: annr005@student.liu.se

LJ: linja498@student.liu.se

SM: susma302@student.liu.se

TW: tovwi961@student.liu.se

RJ: robert.johansson@liu.se

PC: per@carlbring.se

GA: gerhard.andersson@liu.se

### Article Summary

#### 1) Article Focus

• It is well established that guided self-help interventions, administered through internet, can have positive effects on symptoms of depression. There ~~are, however, to our knowledge no controlled trials~~ are, however, to our knowledge no controlled trials on smartphone-delivered behavioral activation, neither on mindfulness.

• Both behavioral activation and mindfulness are components in multi-component treatment packages, and as such they might be easier to target in smartphone applications than an entire treatment program would be, due to the need of simple and fast interaction with the treatment

1  
2  
3  
4  
5  
6  
7  
8  
9 program.

10 • The aim of this study was to test the effects of two smartphone-delivered treatments; one based  
11 on behavioral activation and the other on mindfulness. We expected that behavioral activation  
12 would be superior to mindfulness for participants suffering from more severe depression.

## 14 2) Key Messages

15 • This The large within-group effect sizes are comparable to other depression treatment and  
16 indicate that this smartphone format might work well for a depressed population.

17  
18 • Behavioral activation might work better for a more severely depressed population, whereas  
19 mindfulness might work better for people suffering from light depression, at least in this  
20 smartphone format.

21 • Since smartphones likely will be integrated even further in society, they may be important in  
22 the future of making depression treatment and other psychological treatment more assimilated  
23 into people's daily life.

## 25 3) Strengths and Limitations.

26 • One of the first to do a randomized controlled trial using smartphone applications.

27  
28 • Did not control for the different components separately, so we cannot determine which parts of  
29 the treatments were effective.

## 31 **Keywords**

32 Depression, Behavioral activation, Smartphone application, Mindfulness.

## 34 **Abstract**

### 35 **Objectives**

36 Evaluating the effectiveness of two smartphone-delivered treatments; one based on behavioral  
37 activation and the other on mindfulness.

### 38 **Design**

39 Parallel randomized controlled, open, trial. Participants were allocated using an online  
40 randomization tool ([www.random.org](http://www.random.org)), handled by an independent person who was separate  
41 from the staff conducting the study.

### 42 **Setting**

43 Open trial at a university psychological center in Sweden. General community, with recruitment  
44 nationally through mass media and advertisements.

## Participants

40 participants diagnosed with major depressive disorder received a behavioral activation treatment, and 41 participants received a mindfulness treatment

9 participants were lost ~~to~~at the post-treatment.

## Intervention

Behavioral activation: An 8 week long behavior program administered via a smartphone application. Mindfulness: An 8 week long mindfulness program, administered via a smartphone application. □

## Main outcome measures

The primary outcome measures were the Beck Depression Inventory-II (BDI-II) and the 9-item Patient Health Questionnaire Depression Scale (PHQ-9). □

## Results

81 participants (BA n=40; Mindfulness n=41) were randomized (mean age 36.0 years (SD=10.8)) ~~and -All were included in the intention to treat analysis analyzed. Results showed large within-group effect sizes on the BDI-II for the behavioral activation treatment and mindfulness treatment respectively from pre-treatment to the 6-month follow up ( $d=1.19$  and  $d=1.09$ ), but no significant interaction effects of group and time on any of the outcome measures from pre-treatment to the 6-month follow up. Subgroup analyses showed that the behavioral activation treatment was more effective than the mindfulness treatment among participants with higher initial severity of depression, measured with the PHQ-9. In contrast, the mindfulness treatment worked better than the behavioral activation treatment among participants with lower initial severity. Within group effects from pre measurement to post measurement on BDI-II were  $d=1.83$  CI [0.27 3.38] and  $d=1.21$  CI [-0.95 3.38] for the behavioral activation treatment and mindfulness treatment respectively. From pre measurement to 6 month follow up, effects were  $d=1.19$  CI [-0.87 3.24] and  $d=1.09$  CI [-1.32 3.50] respectively.~~

## Conclusions

~~For participants with higher severity of depression, the treatment based on behavioral activation was superior to the treatment based on mindfulness. For participants with lower initial severity, the treatment based on mindfulness worked significantly better than the treatment based on behavioral activation.~~

~~The large within group effects on the primary outcome measures, as well as the large recovery rates for both groups, indicate that this smartphone format works well for a depressed population.~~

## Trial registration

Clinical Trials NCT01463020.

1  
2  
3  
4  
5  
6  
7  
8  
9  
10 **Funding**

11 The Swedish Research Council, 2011-2476  
12  
13  
14  
15  
16  
17  
18  
19  
20  
21  
22  
23  
24  
25  
26  
27  
28  
29  
30  
31  
32  
33  
34  
35  
36  
37  
38  
39  
40  
41  
42  
43  
44  
45  
46  
47  
48  
49  
50  
51  
52  
53  
54  
55  
56  
57  
58  
59  
60

For peer review only

## Background

Major depressive disorder (MDD) is a major health problem, which lowers the quality of life for the individual and generates enormous costs for society<sup>1,2</sup>. Several forms of psychotherapy have been found to be effective in the treatment of MDD<sup>3</sup>. For example, behavioral activation has an established empirical base<sup>4</sup>. The efficacy of behavioral activation for treating MDD has been established in a number of studies over the past four decades<sup>5</sup>. Moreover, a dismantling study showed that behavioral activation could be as effective as the full cognitive behavior therapy (CBT) treatment package<sup>6</sup>. In addition, a series of reviews and meta-analyses also show that behavioral activation is at least as effective as the full CBT packages that include both cognitive and behavioral components<sup>4</sup>. In a later study, behavioral activation was found to be as effective as antidepressant medication<sup>7</sup>.

It is also well established that guided self-help interventions, administered through internet, can have positive effects on symptoms of depression<sup>8-10</sup>. An increasing number of studies show that this treatment format can be as effective as face-to-face treatment for mild to moderate MDD and anxiety disorders<sup>9</sup>. Guided treatments distributed digitally have provided a way to reach out to more patients in a manner that in most cases requires less therapist time than face-to-face psychotherapy<sup>11</sup>. There are, however, to our knowledge no controlled trial on internet-delivered pure behavioral activation, and no study using smartphones for the delivery of behavioral activation, even if studies are being conducted on smartphone-administered CBT<sup>12</sup>.

An important feature of mobile technology is the possibility for the therapist to reach the patient outside of the therapy room or when not sitting in front of the computer, and thus create direct incentives for behavior change in the patient's everyday life<sup>13</sup>. Therefore, behavioral activation is a treatment that could benefit from the use of new mobile technologies (for example smartphones) by creating direct incentives for behavioral activation in patient's everyday life.

The same applies for mindfulness. Mindfulness is often a component in the so called third wave of CBT, such as mindfulness-based cognitive therapy (MBCT;<sup>14</sup>), dialectical behavior therapy (DBT;<sup>15</sup>), and acceptance and commitment therapy (ACT;<sup>16</sup>). Studies have shown a significant negative correlation between mindfulness and depression<sup>17,18</sup>. Moreover, a meta-analysis based on 39 studies of mindfulness for depression and anxiety showed a moderate effect size of Hedges's  $g=0.59$  for improving mood symptoms<sup>19</sup>. The analysis also showed that mindfulness was effective for individuals with depression as both the primary diagnosis and the secondary. Moreover, mindfulness has been shown to be effective in relapse prevention in depression<sup>20</sup>. Within digitally distributed treatments, mindfulness has appeared as a component in CBT-based internet treatments, but there have so far been few studies on mindfulness as a stand-alone, digitally distributed treatment for depression<sup>21</sup>.

The advantages as well as the challenges of using mobile phones in CBT have been summarized by Boschen and Casey<sup>13</sup>. One challenge with using the mobile phone as a platform for psychological treatment is that the user must be able to interact with the program in an easy way<sup>13</sup>. Both behavioral activation and mindfulness are components in multi-component treatment



1  
2  
3  
4  
5  
6  
7  
8  
9 packages, and as such they might be easier to target in smartphone applications than an entire  
10 treatment program would be, due to the need of simple and fast interaction with the treatment  
11 program.

12  
13 At the same time, research suggests that depression severity is known to be a significant  
14 moderating factor in the treatment of depression. For example, some initial evidence suggests  
15 that there is a difference in efficacy between two different forms of CBT in the treatment of the  
16 more severely depressed patients<sup>7,22</sup>. There are also indications that the difference between  
17 antidepressant medication and placebo is evident in severe depression, but not in mild to  
18 moderate depression<sup>23</sup>, and that combined treatments with medication and psychotherapy are  
19 more effective than single treatments<sup>22</sup>. These results suggest that baseline depression severity  
20 may moderate the response to different variants of treatments. Thus, it is concluded that different  
21 treatments distributed digitally can target different subgroups of depression, in terms of severity.  
22 For example, Dimidjian et al. (2006) found that among more severely depressed patients,  
23 behavioral activation was comparable to antidepressant medication, and significantly  
24 outperformed cognitive therapy, whereas for the less severely depressed patients, no differential  
25 treatment effects were observed.

26  
27 The aim of this study was to test the effects of two smartphone-delivered treatments; one based  
28 on behavioral activation and the other on mindfulness. Hence, the main question is whether  
29 behavioral activation is more effective than mindfulness delivered over smartphone. The study  
30 was based on our previous work on guided internet-treatment for depression<sup>24</sup>, but in the current  
31 study the treatment content was delivered entirely via the participants personal smartphone,  
32 using recently developed smartphone applications. We expected, in line with Dimidjian and  
33 coworkers' conclusions (BA relative to CT  $d=0.87$  on BDI), that behavioral activation would be  
34 superior to mindfulness for participants suffering from more severe depression with an expected  
35 between group effect size of Cohen's  $d=0.50$ ). In order to evaluate long-term effects, we also  
36 included a 6-month follow-up after the start of the treatment.

## 37 38 **Methods**

### 39 **Ethics statement**

40  
41 The study was approved by the Regional Ethics Board of Linköping, Sweden. Written informed  
42 consent was obtained from all participants by surface mail.

### 43 44 **Recruitment and selection**

45  
46 The participants were mainly recruited via mass media and advertisements in large Swedish  
47 newspapers. Those who were interested were directed to a web page with information about the  
48 study, the treatments being tested and how to participate in the study.

49  
50 Inclusion criteria for the study were a) being at least 18 years old, b) having a point total of  $\geq 5$  on  
51 PHQ-9, c) reported unchanged dosage of medication for depression and anxiety during the last  
52 month, d) not being in any concurrent psychological treatment, e) not suffering from a severe  
53  
54  
55  
56  
57  
58  
59  
60

1  
2  
3  
4  
5  
6  
7  
8  
9  
10  
11  
12  
13  
14  
15  
16  
17  
18  
19  
20  
21  
22  
23  
24  
25  
26  
27  
28  
29  
30  
31  
32  
33  
34  
35  
36  
37  
38  
39  
40  
41  
42  
43  
44  
45  
46  
47  
48  
49  
50  
51  
52  
53  
54  
55  
56  
57  
58  
59  
60

comorbid psychiatric condition that could interfere with the treatment (e.g. bipolar disorder or schizophrenia, assessed during a clinical interview), f) not having other primary medical problems which would need other treatments first hand, g) not having severe alcohol problems, h) no assessed risk of being suicidal (see below for details) and i) major depression according to the DSM-IV, with at least an episode in partial remission. The diagnosis of MDD was confirmed by a structured interview (see below). Additionally, an assessment of suicidal ideation was conducted. The interviews were made over telephone by four MSc clinical psychology students. The principal research executive reviewed all the protocols from the interviews together with the interviewers. Questions regarding medication and psychiatric history that came up in the interview were considered before the decision on inclusion was made.

Of the 231 individuals who initially expressed interest in the study, 126 completed all the questions in the online screening (22 did not finish the screening and 83 did not begin the screening). Of these, 29 were excluded before the diagnostic interview telephone interview started. 13 individuals were excluded after the diagnostic interview telephone interview. Eighty-four were subsequently included after the interview had been conducted. Before the study started, three participants chose not to participate in the study. The reasons for exclusion are specified in the flowchart found in Figure 1.

Among the randomized participants there were 70.3 % women ( $n=57$ ) and 29.6 % men ( $n=24$ ). The mean age was 36.0 years ( $SD=10.8$ ) ranging from 20 to 61 years. See Table 1 for additional demographical data. There were no significant differences in demographic characteristics between the groups according to chi-square analysis.

### Outcome measures

**Primary outcome measures.** The primary outcome measures were the Beck Depression Inventory-II (BDI-II; <sup>25</sup>) and the 9-item Patient Health Questionnaire Depression Scale (PHQ-9; <sup>26,27</sup>) that were administered pre-treatment, at post-treatment and also six months after the treatment had ended. The PHQ-9 was also administered on a weekly basis during the entire treatment phase (8 weeks). Hence, there were three measurements on the outcome BDI-II and 10 measurements on the outcome PHQ-9.

**Secondary outcome measures.** In addition to the BDI-II and PHQ-9, the Beck Anxiety Inventory (BAI; <sup>28</sup>), the Quality of Life Inventory (QOLI; <sup>29,30</sup>), the Trimbos and Institute of Medical Technology Assessment Cost Questionnaire for Psychiatry (TIC-P; <sup>31,34</sup>) and the Acceptance and Action Questionnaire (AAQ-II; <sup>32</sup>) were administered. The AAQ-II was administered on a weekly basis during the entire treatment phase (8 weeks). All other outcome measures were collected at pre-treatment, post-treatment and at 6-month after the start of the treatment, except for the TIC-P that was collected at pre-treatment and at 6-month after the treatment started. Hence, there were two measurements on the outcome TIC-P, three measurements on the outcomes BAI and QOLI and 10 measurements on the outcome AAQ-II.

**Clinician-administered measures.** Psychiatric diagnoses were assessed at pre-treatment, post-

1  
2  
3  
4  
5  
6  
7  
8  
9 | treatment and at 6-month after the start of the treatment, using the Mini-International  
10 Neuropsychiatric Interview (M.I.N.I.;<sup>33</sup>). The M.I.N.I. is a diagnostic interview that, in contrast  
11 to several other diagnostic interviews, is completely structured, making it appropriate for other  
12 assessors than experienced psychiatrists<sup>33</sup>. All interviews were conducted by the four  
13 psychology students described above, who at post-treatment were blind to participant's  
14 condition. At the 6-month follow-up, the interviews were conducted by other clinical psychology  
15 students who were blind to both the participant's condition and the treatment they had been  
16 given. Recovery rates were defined as no longer fulfilling the criteria for depression according to  
17 M.I.N.I.

18  
19 | Treatment credibility. To measure treatment credibility, Borkovec and Nau's  
20 Credibility/expectancy scale (C-Scale)<sup>34</sup> was used. The C-scale measures the way in which  
21 participants view the logic of the treatment (credibility) and the improvements that can be  
22 achieved (expectancy) and includes five items on a 10-point scale. Assessment was made after  
23 the first week of treatment.

24  
25  
26 Credibility. The credibility of the two treatments showed a mean score of 31.9 (SD=7.1) for the  
27 behavioral activation group and at 32.1 (SD=7.8) for the mindfulness group on the Borkovec and  
28 Nau e Scale<sup>34</sup>.

### 30 Procedure and design

31 For those participants included in the study, the results from the online screening were used as  
32 pre-treatment assessment. All measures used have been shown to have good psychometric  
33 properties, with internal consistencies of at least  $\alpha=.79$ . Details of this can be found in the  
34 respective references of the outcome questionnaires. The outcome measures used have  
35 established good psychometric properties, also when administered via the internet<sup>35 36</sup>.

36  
37  
38 After the recruitment, participants were allocated using an online randomization tool  
39 ([www.random.org](http://www.random.org)), handled by an independent person who was separate from the staff  
40 conducting the study.

### 42 The interventions

43 **Behavioral activation treatment.** An 8-week smartphone-based behavioral activation  
44 intervention with minimal therapist contact was developed by our research group. The  
45 intervention consisted of a short web-based psychoeducation, and a step-by-step behavior  
46 program administered via a smartphone application. The psychoeducation aimed to introduce the  
47 participants to the treatment, touching on topics like the prevalence of depression, its etiology  
48 and maintenance factors based on operant conditioning, as well as the theoretical basis for  
49 behavioral activation. The text was written specially for the current intervention, but inspired by  
50 Martell et al.<sup>37</sup> and Lejuez, Hopko & Hopko<sup>38</sup>. In all, there were three chapters, totaling 11  
51 pages of text, containing 3 893 words.

1  
2  
3  
4  
5  
6  
7  
8  
9 The smartphone application was built as a native application for Iphone and a mobile web  
10 application for other smartphones. See Figure 2 for a screenshot of the application. A prototype  
11 of the smartphone application was tested in a pilot study<sup>39</sup>. This prototype, however, was not  
12 specifically designed for depression interventions. The purpose of the behavioral activation  
13 application was to make it easy for the participant to remember and register important behaviors,  
14 in order to increase everyday activation. The application contained a database of 54 behaviors,  
15 divided into three different areas for the participant to add to their application. See Table 2 for  
16 the list of behaviors from the database. The database aimed to provide suggestions, help, and  
17 inspiration to get started with the application. Participants were also able to add their own areas  
18 and behaviors into the application to start tracking. Through the initial psychoeducation, the  
19 participants were guided to add few (between two and four) and easy behaviors from start,  
20 mainly from the database.

21  
22 When a behavior was completed, the participant could mark this in the application and add a  
23 short reflection. Statistics and summaries of quantitative (i.e. behavior frequency) and qualitative  
24 data (i.e. reflections) were presented in the application for the participant.

25  
26 There was also a back-end system where all the quantitative and qualitative data from the  
27 participants was accessible for the therapist. From the back-end system, the therapist could send  
28 short text messages to the participants via a messaging system, similar to Short Message Service  
29 (SMS). The messaging system was used by the therapists to send personal encouraging messages  
30 every other, or every third day to the participants, as well as weekly general educational  
31 messages. The system functioned as a one-way communication, which means that the  
32 participants were not able to reply the messages.

33  
34 Apart from this, the participants were told to write a reflection to summarize every week for their  
35 therapist and send it in via e-mail, in the end of every treatment week. The participants received  
36 personal feedback on their reflection from their therapist. No sensitive data was saved on a  
37 computer, in which the person providing data could be identified. In addition, all internet and  
38 smartphone activities was secured, with encrypted information.

39  
40  
41 **Mindfulness treatment.** The mindfulness intervention, also an 8-week smartphone-based  
42 intervention with minimal therapist contact, consisted of a short web-based psychoeducation, and  
43 a step-by-step mindfulness practice program, administered via a smartphone application. The  
44 psychoeducation for the mindfulness intervention was equivalent to that of the behavioral  
45 activation intervention, except that the theoretical basis of mindfulness was presented instead of  
46 the theoretical basis of behavioral activation. The text was written specially for the current  
47 intervention, but inspired by [Williams et al.](#)<sup>40</sup>. In all, there were three chapters, totaling 9 pages  
48 of text, containing 2 927 words.

49  
50 The smartphone application for Iphone was an established and commercially available  
51 application that could be downloaded from the Apple app store. See Figure 3 for a screenshot of  
52 the application. For other smartphones, a mobile web application was built especially for the  
53  
54  
55  
56  
57  
58  
59  
60

1  
2  
3  
4  
5  
6  
7  
8  
9 current study with the aim of mimicking the Iphone application. The application consisted of a  
10 number of audio tracks with exercises to facilitate the practice of mindfulness. The exercises  
11 were both guided and unguided, and in short (three minutes) and long (30 minutes) format.  
12 Through the initial psychoeducation, the participants were guided to start with short mindfulness  
13 exercises.

14  
15 Since the mindfulness application did not have a communication system such as the behavioral  
16 activation application, e-mails were used to emulate the messaging system in the behavioral  
17 activation application. Hence, the therapists sent encouraging messages every other, or every  
18 third day to the participants, as well as weekly general educational messages via mail. The  
19 difference in how the therapists communicated in the mindfulness intervention, compared with  
20 the behavioral activation intervention, was that the therapists could not give specific feedback on  
21 activities or exercises that the participants had done. Otherwise, the communication was similar  
22 (length and type of content).

23  
24 Additionally, the participants given the mindfulness intervention were also told to write a  
25 reflection to summarize every week for their therapist and send it in via e-mail. The participants  
26 received personal feedback on their reflection from their therapist.  
27

28  
29 **Therapists.** The therapists were four final-semester students from a five-year M.Sc. clinical  
30 psychologist program. All therapists had completed their clinical training as well as 16 weeks of  
31 internship. Each therapist was responsible for the treatment of 8 to 10 participants from the  
32 behavioral activation group and an equal number of participants from the mindfulness group.  
33 Therapists were randomly allocated to participants, with the restriction of not having more than  
34 10 participants from each group. For the entire duration of the study the therapists received  
35 continuous supervision from an experienced psychotherapist with CBT orientation, who had  
36 previous experience of working with a behavioral activation treatment manual.

### 37 38 **Subgroups based on cut-off scores**

39 All randomized participants were classified into groups of either high or low severity of  
40 depression. These classes were formed based on the cut-offs scores on the PHQ-9. The  
41 participants were considered to suffer from higher severity of depression if they scored  $\geq 10$  on  
42 PHQ-9 and if they fulfilled the criteria for an ongoing primary diagnosis of major depression of  
43 moderate character ( $n=51$ ). Participants, not fulfilling these criteria were considered to suffer  
44 from lower severity of depression ( $n=30$ ).

### 45 46 **Data analysis**

47 All analyses were performed using SPSS 20 (SPSS, Inc., Chicago, IL). Independent  $t$ -tests and  
48  $\chi^2$ -tests were used to test for group differences in demographics, pre-treatment data and in  
49 recovery rates- clinical significant improvement. Differences between the behavioral activation  
50 treatment and the mindfulness treatment were primarily investigated by modeling interaction  
51 effects of group and time. In order to adhere to the intention-to-treat principle, the continuous  
52

1  
2  
3  
4  
5  
6  
7  
8  
9  
10  
11  
12  
13  
14  
15  
16  
17  
18  
19  
20  
21  
22  
23  
24  
25  
26  
27  
28  
29  
30  
31  
32  
33  
34  
35  
36  
37  
38  
39  
40  
41  
42  
43  
44  
45  
46  
47  
48  
49  
50  
51  
52  
53  
54  
55  
56  
57  
58  
59  
60

~~outcome variables (except from TIC-P, that was not analyzed as part of this study) were analyzed using mixed effects models, given their ability to handle missing data. For the PHQ-9, where weekly measures were available, the continuous outcome variable was analyzed using mixed effects models, given their ability to handle missing data<sup>41</sup>. Random intercept models were selected. All analyses used Maximum Likelihood estimation. Random intercept models were selected for all measures. Differences between the behavioral activation treatment and the mindfulness treatment were primarily investigated by modeling interaction effects of group and time. For the PHQ-9 and the AAQ-II, where weekly measures were available. Also, several models were compared using available information criteria, and the model with best fit was chosen. (The covariance between the random intercept and slope was not significant, and therefore was not included in the model. Error terms across time were modeled with a first order autoregressive covariance structure with heterogeneous variances. Hence, a random intercept model was used also for these measures. Differences in average rates of growth between the two groups were examined by a fixed effects interaction between group and time. Between-group differences at post-treatment were analyzed using independent *t*-tests. Power analysis indicated an 89% chance of detecting a between-group effect size of  $d=0.60$  ( $\alpha$  level=0.05). Within- and between-group effect sizes (Cohen's *d*) were calculated by dividing the differences in means by the pooled standard deviations<sup>42</sup>. This was done both from pre-measurements to post-measurements, and from pre-measurements to the 6-month follow up data.~~

## Results

The two groups did not differ significantly on any of the measures at pretreatment ( $t=0.50$  to  $0.67$ ,  $df=79$ ,  $p=0.78$  to  $0.50$ ). The results will be presented in the following order: attrition and adherence, self-report inventories (including effect size) both for the whole sample and the subgroups, recovery rates and treatment credibility.

### Attrition and adherence

Of the 84 participants randomized, three participants decided not to participate in the study. Nine out of these 81 participants (11.1 %) did not provide post-treatment data. Six out of these (totaling 7.4 %) were unreachable for the telephone interview and were classified as unimproved. In the 6-month follow-up, 69 participants from the two treatment groups (85.2 %) provided data on the self-report measures and 59 (72.8 %) were reached for the telephone interview. Once again, those unreachable were classified as unimproved.

Adherence to treatment was defined as the number of weekly reflections the participants sent to their therapist. In order to be considered as a completed week, at least one reflection had to have been sent to the therapist during that week. Of the 81 participants, 57 (70 %) succeeded to adhere to all the eight weeks. Of these, 25 (63 %) were in the behavioral activation group and 32 (78 %) were in the mindfulness group. In average, participants succeeded to adhere to six weeks ( $M=5.8$ ,  $SD=2.47$ ).

### Primary outcome measure

No significant interaction effects of group and time on the PHQ-9 and the BDI-II were found between the groups, neither from pre-treatment to post-treatment (PHQ-9: ( $F(1, 501.47)=.28, p's=.60$ ); BDI-II: ( $F(1, 74.11)=.28, p's=.60$ )), nor from pre-treatment to the 6-month follow up (PHQ-9: ( $F(1, 571.49)=.36, p's=.55$ ); BDI-II: ( $F(1, 147.96)=.09, p's=.77$ )). However, as evident from Table 3, large within-group effect sizes were found on PHQ-9 and BDI-II, between pre-treatment and post-treatment, as well as between pre-treatment to the 6-month follow up. This was the case for both the behavioral activation treatment and the mindfulness-treatment.

### Subgroup analyses

For the participants suffering from high severity of depression ( $\geq 10$  on the PHQ-9 and an ongoing primary diagnosis of major depression of moderate character), a mixed-effects model analysis on the PHQ-9 revealed significant interaction effects of group and time in favor for the behavioral activation group. Thus, the results indicated a difference between the groups from pre-treatment to 6-month follow-up ( $F(1, 362.1)=5.2, p's<.05$ ). As seen in Table 3, the effect size between the groups at 6-month follow-up was small, but close to medium (Cohen's  $d=0.47$ ; CI [-1.46, 2.40]).

For the more mildly depressed participants there was a significant effect in favor of the mindfulness group from pre-treatment to 6-month follow-up on both the PHQ-9 ( $F(1, 69.3)=7.7, p's<.01$ ) and the BDI-II ( $F(1, 53.60)=6.25, p's<.05$ ). The effect sizes between the groups at 6-month follow-up were, as evident from Table 3, large (PHQ-9: Cohen's  $d=0.986$ ; CI [-0.72, 2.68]; BDI-II: Cohen's  $d=1.21$ ; CI [-1.71, 4.13]).

### Secondary outcome measure

As evident from Table 3 no significant interaction effects were found on the secondary measures neither from pre-treatment to post-treatment (BAI: ( $F(1, 74.05)=1.30, p's=.26$ ); AAQ-II: ( $F(1, 570.00)=.07, p's=.79$ ); QOLI: ( $F(1, 76.43)=1.06, p's=.31$ )), nor from pre-treatment to the 6-month follow up (BAI: ( $F(1, 147.01)=.35, p's=.56$ ); AAQ-II: ( $F(1, 639.00)=.11, p's=.74$ ); QOLI: ( $F(1, 148.61)=.39, p's=.53$ )). Nevertheless, as shown in table 3, medium to large within-group effect sizes were revealed on all secondary outcome measures. This was evident for both groups, and on pre-treatment to post-treatment, as well as on pre-treatment to the 6-month follow up.

### Recovery rates

There were no significant differences in recovery rates between the groups, neither at post-treatment nor at the 6-month follow-up. This was the case both when analyzing the whole sample as well as the subgroups. When analyzing the whole sample, 73.5 % ( $n=25$ ) in the behavioral activation group recovered after treatment, compared to 53.1 % ( $n=17$ ) in the mindfulness group ( $\chi^2(N=66, df=1)=2.97, p=.07+$ ). At the 6-month follow-up, 30 out of 34 participants (88.2 %) from the behavioral activation group had recovered, and 26 out of 32 participants (81.3 %) from the mindfulness group had recovered ( $\chi^2(N=66, df=1)=.63, p=.327$ ).

When analyzing only the severe depressed participants, there was a tendency in favor for the behavioral activation group. Among the severely depressed participants, 73.9 % ( $n=17$ ) in the behavioral activation group recovered after treatment, compared to 50.0 % ( $n=14$ ) in the mindfulness group ( $\chi^2(N=51, df=1)=3.03, p=.072$ ). At the 6-month follow-up, 21 out of 23 participants (91.3 %) from the behavioral activation group had recovered, and 22 out of 28 participants (78.6 %) from the mindfulness group had recovered ( $\chi^2(N=51, df=1)=1.55, p=.2097$ ).

### **Treatment credibility and therapist time**

The credibility of the two treatments showed a mean score of 31.9 ( $SD=7.1$ ) for the behavioral activation group and at 32.1 ( $SD=7.8$ ) for the mindfulness group on the Borkovec and Nau c-Scale<sup>34</sup>.

An independent t-test showed no significant difference between the two groups on the C-scale ( $t(78)=0.12, p=0.90$ ). Furthermore, the C-scale did not correlate significantly with any of the outcome measures, either for all participants combined ( $r=0.13, p=0.27$ ), for the behavioral activation group ( $r=0.01, p=0.92$ ) or for the mindfulness group ( $r=.23, p=.18$ ).

The therapist time per participant and week varied depending on whether the participant had sent a reflection or not. The therapists reported a span between 2 and 18 minutes per week and participants. However, the therapist time did not differ between the two treatment groups.

## **Discussion**

The overall aim of this study was to investigate the effects of two smartphone-delivered treatments for people suffering from mild to moderate major depression; one based on behavioral activation and the other on mindfulness. Hence, the main question was whether behavioral activation is more effective than mindfulness delivered over smartphone. When analyzing the whole sample as one entity, the result showed that the two interventions ~~were effective for treating depression with large within-group effect sizes and large recovery rates, but that they did~~ not differ significantly from one another; neither from pre-treatment to post-treatment, nor from pre-treatment to the 6-month follow-up on any of the outcome measures. Also, there were no significant differences in recovery rates between the groups, neither at post-treatment nor at the 6-month follow-up.

This study also explored how different levels of initial depression severity could moderate response to the different interventions. All randomized participants were classified into either high or low severity of depression based on the cut-offs scores on the PHQ-9 and if they fulfilled the criteria for an ongoing primary diagnosis of major depression. For participants with higher severity of depression, the treatment based on behavioral activation was superior to the treatment based on mindfulness, as measured with PHQ-9. In contrast, for participants with lower initial



1  
2  
3  
4  
5  
6  
7  
8  
9 severity, the treatment based on mindfulness worked better than the treatment based on  
10 behavioral activation, as measured with PHQ-9 and BDI-II.

11  
12 The result from the analysis of the higher severity participants is in line with earlier <sup>7</sup> findings.  
13 For example, Dimidjian et al (2006) showed that behavioral activation was comparable in  
14 efficacy to antidepressant medication, and more efficacious than cognitive therapy - but only  
15 among those patients who were more severely depressed. In line with this, Beck and colleagues  
16 <sup>43</sup> have long suggested that therapists should focus on behavioral strategies early in treatment  
17 when patients are more depressed and return to that emphasis later if patients start to worsen.

18  
19 The result from the analysis of the less severely depressed participants was unexpected to us.  
20 Although there is yet only initial evidence that mindfulness treatment is effective for acute or  
21 severely depressed <sup>44 45</sup>, mindfulness has proven to be effective for relapse prevention of  
22 depression <sup>20 46 47</sup>. That gives implications that a mindfulness-based treatment administered  
23 through smartphone will work better for people suffering from mild depression. However, the  
24 fact that the mindfulness-based treatment worked significantly better than the behavioral  
25 activation-treatment was surprising to us. One explanation could be that the less severely  
26 depressed participants suffered more from stress and anxiety rather than depression. This  
27 population would then not be in need of a treatment that encourages more activation. Instead, a  
28 mindfulness treatment could work very well for this kind of problems <sup>19 48</sup>.

29 Moreover, the results showed that the two interventions were effective for treating depression  
30 with large within-group effect sizes and large recovery rates, which are comparable to other  
31 depression treatment. This indicates that this smartphone format might work well for a depressed  
32 population.

### 33 34 **Limitations**

35  
36 There are a number of limitations that need to be mentioned. The first ~~and is that it is impossible~~  
37 ~~to determine which parts of the treatments were effective. Since we did not control for the~~  
38 ~~different components separately, we cannot, for example, rule out that the result was mainly an~~  
39 ~~effect of the therapist support. An additional treatment arm with only therapist support would~~  
40 ~~make it possible to rule out this question. no wait list group was included. However, our main~~  
41 ~~research question was to assess whether behavioral activation is more effective than mindfulness~~  
42 ~~delivered over smartphone. Hence, we wanted to isolate all other components, such as the~~  
43 ~~therapist support and the psychoeducation, and only investigate the two smartphone applications.~~

44 A second limitation is that the study was underpowered. Thus, it is difficult to detect significant  
45 overall differences between the two smartphone-treatments, even if significant interaction effects  
46 were found when using mixed effects models with PHQ-9 in the subgroup analyses. A post-hoc  
47 power analysis revealed that a sample of 393 participants was required to detect small between-  
48 group effects. We were not expecting that the mindfulness treatment would be as effective and  
49 powered the trial as if a moderate between-group effect would be found.

50 A third limitation was that the participants were recruited nationally through mass media and  
51 advertisements. Thus, we cannot be sure that this treatment would work in a clinical setting, e.g.  
52 an outpatient psychiatric facility. However, mean depression severity as measured by the BDI-II  
53  
54  
55  
56  
57  
58  
59  
60

at intake ( $M=24.10$ ) is rather close to the limit of 29 proposed for defining severe depression <sup>25</sup>.

Fourth, we recruited a broad range of participants, with regards to the severity of depression (a minimum of 8 and a maximum of 44 on BDI-II at intake). This makes it difficult to target a specific group for whom the treatments would be effective. Nevertheless, a subgroup analysis showed that participants with higher severity of depression responded to the behavioral activation significantly better than the treatment based on mindfulness, whereas the treatment based on mindfulness worked significantly better than the treatment based on behavioral activation for the participants with lower initial. Additionally, it can be argued that these broad inclusion criteria reflect a real population of individuals with depressive disorders.

A fifth related concern was the large number of participants who had college- or university level education (65.5 %). This might bias generalizability of the results, since it is possible that guided self-help is especially well suited for educated clients. However, there are data indicating that 50 % of patients seeking psychotherapy have some college education <sup>49</sup> and that educated patients may be more inclined to seek help for mental health problems <sup>50</sup>.

### **Conclusion**

Some clinical implications of this study are discussed as follows. Due to the need for simple and fast interaction with the treatment program, singular treatment components such as behavioral activation and mindfulness might be a better target for smartphone applications than entire multi-component treatment packages. At the same time, there is a need for guided self-help treatments distributed digitally that can reach out to more patients. This study is one of the first to test a treatment for depression, administered via smartphone. The large within-group effects on the primary outcome measures, as well as the large recovery rates for both groups **are comparable to other depression treatments, and** indicate that this smartphone format with a small amount of text and minimal therapist support, **might** works well for a depressed population.

Moreover, this study also shows that behavioral activation might work better for a more severely depressed population, whereas mindfulness might work better for people suffering from light depression. These results strengthen the hypothesis that different treatments distributed digitally can target different subgroups of depression, in terms of severity.

From a broader perspective, we believe that smartphones will be integrated even further in society since they are already socially accepted as well as relatively cheap for the functionalities you get <sup>13</sup>, and therefore may serve an important role in health care. Therefore these results, showing that mild to moderate depression can be treated effectively by means of a supported smartphone-application, might be important in the future of making depression treatment and other psychological treatment more assimilated into people's daily life. As suggested in Ly et al. (2012), the smartphone format might also help increasing the awareness of being in treatment in everyday settings, and therefore better help clients create direct incentives for treatment related activities in their everyday life <sup>39</sup>. Using smartphones to distribute psychological treatment might also help making it possible to reach out with psychological therapy to a broader group of people, since their use attracts no attention <sup>13</sup>, allowing users to interact with a device without fear of judgment or stigma. Lastly, psychological treatments distributed via smartphones are not

1  
2  
3  
4  
5  
6  
7  
8  
9 only relevant for Swedish conditions but also for the developing countries in the world, which  
10 increasingly are empowered by mobile phones with internet connection.

11 This study might open up for a broad range of other trials conducted via smartphones, both for  
12 self-help interventions as well as adjunct tools in face-to-face treatments. We believe that a  
13 substantial part of internet-based interventions in the future will be executed through  
14 smartphones or at least supported by smartphones. Further studies should focus on both formats,  
15 as well as expanding the treatment platform to other psychological disorders.  
16  
17  
18  
19  
20  
21  
22  
23  
24  
25  
26  
27  
28  
29  
30  
31  
32  
33  
34  
35  
36  
37  
38  
39  
40  
41  
42  
43  
44  
45  
46  
47  
48  
49  
50  
51  
52  
53  
54  
55  
56  
57  
58  
59  
60

1  
2  
3  
4  
5  
6  
7  
8  
9  
10  
11  
12  
13  
14  
15  
16  
17  
18  
19  
20  
21  
22  
23  
24  
25  
26  
27  
28  
29  
30  
31  
32  
33  
34  
35  
36  
37  
38  
39  
40  
41  
42  
43  
44  
45  
46  
47  
48  
49  
50  
51  
52  
53  
54  
55  
56  
57  
58  
59  
60

## Trial registration

Clinical Trials NCT01463020

## Competing interests

A related version of the behavioral activation application is currently developed for the open market by KHL.

## Author's contributions

KHL was the project manager and has developed the application. KHL also participated in the drafting of the treatment manuals, and participated in analysis and interpretation of data. GA participated in the conception of the study and its design. GA also participated in the drafting of treatment manuals, analysis and interpretation of data, and performed statistical analysis. PC participated in the conception of the study and its design. RJ participated in analysis and interpretation of data, and performed statistical analysis. AT, LJ, SM and TW participated in the drafting of treatment manuals and performed the treatments. KHL and GA drafted the current manuscript. PC and RJ participated in revision of the current manuscript. All authors read and approved the final manuscript.

## Trial protocol

The full trial protocol can be found at: <http://www.trialsjournal.com/content/13/1/62>

## Funding

The Swedish Research Council sponsored this study with funding. 2011-2476

## References

1. Ebmeier K, Donaghey C, Steele J. Recent developments and current controversies in depression. *Lancet* 2006;367:153 - 67.
2. Smit F, Cuijpers P, Oostenbrink J, Batelaan N, de Graaf R, Beekman A. Costs of nine common mental disorders: implications for curative and preventive psychiatry. *J Ment Health Policy Econ* 2006;9:193 - 200.
3. Cuijpers P, van Straten A, Andersson G, van Oppen P. Psychotherapy for depression in adults: a meta-analysis of comparative outcome studies. *J Consult Clin Psychol* 2008;76(6):909-22.
4. Cuijpers P, van Straten A, Warmerdam L. Behavioral activation treatments of depression: a meta-analysis. *Clin Psychol Rev* 2007;27:318 - 26.
5. Dimidjian S, Barrera M, Martell C, Munoz R, Lewinsohn P. The origins and current status of behavioral activation treatments for depression. *Annu Rev Clin Psychol* 2011;7:1 - 38.
6. Jacobson N, Dobson K, Truax P, Addis M, Koerner K, Gollan J, et al. A component analysis of cognitive-behavioral treatment for depression. *J Consult Clin Psychol* 1996;64:295 - 304.
7. Dimidjian S, Hollon SD, Dobson KS, Schmalings KB, Kohlenberg RJ, Addis ME, et al. Randomized trial of behavioral activation, cognitive therapy, and antidepressant medication in the acute treatment of adults with major depression. *J Consult Clin Psychol* 2006;74(4):658-70.
8. Andrews G, Cuijpers P, Craske MG, McEvoy P, Titov N. Computer Therapy for the Anxiety and Depressive Disorders Is Effective, Acceptable and Practical Health Care: A Meta-Analysis. *PLoS ONE* 2010;5(10):e13196.
9. Cuijpers P, Donker T, van Straten A, Li J, Andersson G. Is guided self-help as effective as face-to-face psychotherapy for depression and anxiety disorders? A systematic review and meta-analysis of comparative outcome studies. *Psychol Med* 2010;40(12):1943-57.
10. Carlbring P, Hagglund M, Luthstrom A, Dahlin M, Kadowaki A, Vernmark K, et al. Internet-based behavioral activation and acceptance-based treatment for depression: A randomized controlled trial. *Journal of affective disorders* 2013;148(2-3):331-7.
11. Andersson G. Using the Internet to provide cognitive behaviour therapy. *Behav Res Ther* 2009;47(3):175-80.
12. Watts S, Mackenzie A, Thomas C, Griskaitis A, Mewton L, Williams A, et al. CBT for depression: a pilot RCT comparing mobile phone vs. computer. *BMC psychiatry* 2013;13:49.
13. Boschchen M, Casey L. The use of mobile telephones as adjuncts to cognitive behavioral psychotherapy. *Prof Psychol-Res Pr* 2008;39:546 - 52.
14. Segal ZV, Williams JMG. *Mindfulness-based cognitive therapy for depression*: Guilford Press, 2012.
15. Linehan M. *Cognitive-behavioral treatment of borderline personality disorder*: The Guilford Press, 1993.
16. Hayes SC, Strosahl KD, Wilson KG. *Acceptance and commitment therapy: An experiential approach to behavior change*: Guilford Press New York, 2003.
17. Cash M, Whittingham K. What facets of mindfulness contribute to psychological well-being and depressive, anxious, and stress-related symptomatology? *Mindfulness* 2010;1(3):177-82.
18. Brown KW, Ryan RM. The benefits of being present: mindfulness and its role in psychological well-being. *J Pers Soc Psychol* 2003;84(4):822-48.
19. Hofmann SG, Sawyer AT, Witt AA, Oh D. The effect of mindfulness-based therapy on anxiety and depression: A meta-analytic review. *J Consult Clin Psychol* 2010;78(2):169-83.
20. Piet J, Hougaard E. The effect of mindfulness-based cognitive therapy for prevention of relapse in recurrent major depressive disorder: a systematic review and meta-analysis. *Clinical psychology review* 2011;31(6):1032-40.

1  
2  
3  
4  
5  
6  
7  
8  
9  
10  
11  
12  
13  
14  
15  
16  
17  
18  
19  
20  
21  
22  
23  
24  
25  
26  
27  
28  
29  
30  
31  
32  
33  
34  
35  
36  
37  
38  
39  
40  
41  
42  
43  
44  
45  
46  
47  
48  
49  
50  
51  
52  
53  
54  
55  
56  
57  
58  
59  
60

21. Ljotsson B, Hedman E, Lindfors P, Hursti T, Lindefors N, Andersson G, et al. Long-term follow-up of internet-delivered exposure and mindfulness based treatment for irritable bowel syndrome. *Behav Res Ther* 2011;49(1):58-61.
22. Cuijpers P, Andersson G, Donker T, van Straten A. Psychological treatment of depression: results of a series of meta-analyses. *Nord J Psychiatry* 2011;65(6):354-64.
23. Fournier JC, DeRubeis RJ, Hollon SD, Dimidjian S, Amsterdam JD, Shelton RC, et al. Antidepressant drug effects and depression severity: a patient-level meta-analysis. *JAMA* 2010;303(1):47-53.
24. Andersson G, Bergstrom J, Hollandare F, Carlbring P, Kaldø V, Ekselius L. Internet-based self-help for depression: randomised controlled trial. *The British journal of psychiatry : the journal of mental science* 2005;187:456-61.
25. Beck AT, Steer RA, Brown BK. *Beck Depression Inventory manual*, 1996.
26. Titov N, Dear BF, McMillan D, Anderson T, Zou J, Sunderland M. Psychometric Comparison of the PHQ-9 and BDI-II for Measuring Response during Treatment of Depression. *Cognitive Behaviour Therapy* 2011;40(2):126-36.
27. Kroenke K, Spitzer R, Williams J. The PHQ-9: validity of a brief depression severity measure. *J Gen Intern Med* 2001;16:606 - 13.
28. Beck A, Epstein N, Brown G, Steer R. An inventory for measuring clinical anxiety: psychometric properties. *J Consult Clin Psych* 1988;56:893 - 97.
29. Lindner PA, G.; Öst, L.-G.; Carlbring, P. Validation of the Internet-administered Quality of Life Inventory (QOLI) in different psychiatric conditions. *Cognitive Behaviour Therapy* in press.
30. Frisch M, Cornell J, Villanueva M. Clinical validation of the Quality of life inventory: a measure of life satisfaction for use in treatment planning and outcome assessment. *Psychol Assessment* 1992;4:92 - 101.
31. Hakkaart-van Roijen L, Straten Av, Tiemens B, Donker M. Handleiding Trimbos/iMTA questionnaire for Costs associated with Psychiatric illness (TiC-P): Institute of Medical Technology Assessment (iMTA), 2002.
32. Hayes S, Strosahl K, Bunting K, Twohig M, Wilson K. What is Acceptance and Commitment Therapy? *A Practical Guide to Acceptance and Commitment Therapy* 2004:1 - 30.
33. Sheehan DV, Lecrubier Y, Sheehan KH, Amorim P, Janavs J, Weiller E, et al. The Mini-International Neuropsychiatric Interview (M.I.N.I.): the development and validation of a structured diagnostic psychiatric interview for DSM-IV and ICD-10. *J Clin Psychiatry* 1998;59 Suppl 20:22-33;quiz 34-57.
34. Borkovec TD, Nau SD. Credibility of analogue therapy rationales. *Journal of Behavior Therapy and Experimental Psychiatry* 1972;3(4):257-60.
35. Carlbring P, Brunt S, Bohman S, Austin D, Richards J, Vñst LG, et al. *Computers in Human Behaviour* 2007;23(null):1421.
36. Hollandare F, Andersson G, Engstrom I. A comparison of psychometric properties between internet and paper versions of two depression instruments (BDI-II and MADRS-S) administered to clinic patients. *J Med Internet Res* 2010;12(5):e49.
37. Martell CR, Addis ME, Jacobson NS. *Depression in context: Strategies for guided action*: WW Norton & Co, 2001.
38. Lejuez CW, Hopko DR, Hopko SD. A brief behavioral activation treatment for depression treatment manual. *Behavior Modification* 2001;25(2):255-86.
39. Ly K, Dahl J, Carlbring P, Andersson G. Development and initial evaluation of a smartphone application based on acceptance and commitment therapy. *SpringerPlus* 2012;1(1):11.
40. Williams JMG, Teasdale JD, Segal ZV. *The mindful way through depression: Freeing yourself from chronic unhappiness*: The Guilford Press, 2007.

Formatted: Font: +Headings (Calibri)

Formatted: Font: +Headings (Calibri), 11 pt

Formatted: Font: +Headings (Calibri)

- 1
- 2
- 3
- 4
- 5
- 6
- 7
- 8
- 9 41. Gueorguieva R, Krystal JH. Move over ANOVA: progress in analyzing repeated-measures data and its reflection in papers published in the Archives of General Psychiatry. *Arch Gen Psychiatry* 2004;61(3):310-7.
- 10
- 11 42. Borenstein M, Hedges LV, Higgins JP, Rothstein HR. *Introduction to meta-analysis*: Wiley, 2011.
- 12 43. Beck AT. *Cognitive therapy of depression*: The Guilford Press, 1979.
- 13 44. Manicavasgar V, Parker G, Perich T. Mindfulness-based cognitive therapy vs cognitive behaviour therapy as a treatment for non-melancholic depression. *J Affect Disord* 2011;130(1-2):138-44.
- 14 45. Kenny MA, Williams JM. Treatment-resistant depressed patients show a good response to Mindfulness-based Cognitive Therapy. *Behav Res Ther* 2007;45(3):617-25.
- 15 46. *Psykologisk behandling vid depression : teorier, terapimetoder och forskning A1 - Andersson, Gerhard Y1 - 2012*.
- 16 47. Andersson G. *Psykologisk behandling vid depression: teorier, terapimetoder och forskning*. 2012.
- 17 48. Bishop SR. What do we really know about mindfulness-based stress reduction? *Psychosom Med* 2002;64(1):71-83.
- 18 49. Vessey JT, Howard KI. Who seeks psychotherapy? *Psychotherapy: Theory, Research, Practice, Training* 1993;30(4):546.
- 19 50. Howard KI, Cornille TA, Lyons JS, Vessey JT. Patterns of mental health service utilization. *Archives of General Psychiatry* 1996.
- 20
- 21
- 22
- 23
- 24
- 25
- 26
- 27
- 28
- 29
- 30
- 31
- 32
- 33
- 34
- 35
- 36
- 37
- 38
- 39
- 40
- 41
- 42
- 43
- 44
- 45
- 46
- 47
- 48
- 49
- 50
- 51
- 52
- 53
- 54
- 55
- 56
- 57
- 58
- 59
- 60

Table 1. Demographic description of the participants at randomization.

|                                    |                             | Behavioral activation<br>(N = 40) | Mindfulness<br>(N = 41) | Total<br>(N = 81) |
|------------------------------------|-----------------------------|-----------------------------------|-------------------------|-------------------|
| Age                                | Mean (SD)                   | 36.6 (10.5)                       | 35.6 (11.3)             | 36.1 (10.8)       |
|                                    | Min-Max                     | 20-59                             | 21-61                   | 20-61             |
| Gender                             | Female                      | 28 (70 %)                         | 29 (70.7 %)             | 57 (70 %)         |
|                                    | Male                        | 12 (30 %)                         | 12 (29.3 %)             | 24 (30 %)         |
| Marital status                     | Single                      | 15 (37.5 %)                       | 15 (36.6 %)             | 30 (37 %)         |
|                                    | Married                     | 19 (47.5 %)                       | 24 (58.6 %)             | 43 (53.2 %)       |
|                                    | Divorced/widow/widower      | 5 (12.5 %)                        | 1 (2.4 %)               | 6 (7.4 %)         |
|                                    | Other                       | 1 (2.5 %)                         | 1 (2.4 %)               | 2 (2.4 %)         |
| Highest educational level          | Nine year compulsory school | 1 (2.5 %)                         | 2 (4.9 %)               | 3 (3.8 %)         |
|                                    | Secondary school            | 11 (27.5 %)                       | 14 (34.1 %)             | 25 (30.9 %)       |
|                                    | College/university          | 27 (67.5 %)                       | 24 (58.5 %)             | 51 (63 %)         |
|                                    | Other                       | 1 (2.5 %)                         | 1 (2.4 %)               | 2 (2.5 %)         |
| Employment status                  | Employed/student            | 35 (87.5 %)                       | 30 (73.2 %)             | 65 (80.2 %)       |
|                                    | Unemployed                  | 3 (7.5 %)                         | 3 (7.3 %)               | 6 (7.4 %)         |
|                                    | Retired                     | 0 (0 %)                           | 1 (2.4 %)               | 1 (1.2 %)         |
|                                    | Other                       | 2 (6.3 %)                         | 7 (17.1 %)              | 9 (11.1 %)        |
| Type of Smartphone                 | Iphone                      | 24 (60 %)                         | 23 (56.1 %)             | 47 (58 %)         |
|                                    | Android                     | 16 (40 %)                         | 18 (43.9 %)             | 34 (42 %)         |
| Medication                         | Yes, earlier                | 10 (25 %)                         | 13 (31.7 %)             | 23 (28.4 %)       |
|                                    | Yes, present                | 12 (30 %)                         | 14 (34.1 %)             | 26 (32.1 %)       |
|                                    | None                        | 18 (45 %)                         | 14 (34.1 %)             | 32 (39.5 %)       |
| Psychological treatment            | Yes, earlier                | 19 (47.5 %)                       | 23 (56.1 %)             | 42 (51.9 %)       |
|                                    | None                        | 21 (52.5 %)                       | 18 (43.9 %)             | 39 (48.1 %)       |
| Experience of self-help literature | Yes                         | 12 (30 %)                         | 13 (31.7 %)             | 25 (30.9 %)       |
|                                    | None                        | 28 (70 %)                         | 28 (68.3 %)             | 56 (69.1 %)       |
| Diagnosis                          | Depression                  | 34 (85 %)                         | 32 (78 %)               | 66 (82.5 %)       |
|                                    | With dysthymia              | 22 (55 %)                         | 18 (44 %)               | 40 (49 %)         |
|                                    | Earlier episodes            | 31 (77.5 %)                       | 34 (83 %)               | 65 (80 %)         |
|                                    | Panic disorder              | 1 (2.5 %)                         | 3 (7.5 %)               | 4 (5 %)           |
|                                    | Social phobia               | 6 (15 %)                          | 7 (17 %)                | 13 (16 %)         |
|                                    | GAD                         | 19 (47.5 %)                       | 10 (24.5 %)             | 29 (36 %)         |

Table 2. List of behaviors in the database.



**Everyday structure**

Get out of bed when the bell rings in the morning  
 Take a shower  
 Get ready in the morning  
 Eat breakfast  
 Read the newspaper  
 Make a meal plan for each day of the week  
 Make a shopping list for meals  
 Buy food for the meals you have planned  
 Prepare a simple meal  
 Clean a part of my home  
 Clean at least 15 minutes  
 Washing dishes immediately after a meal  
 Wash my clothes  
 Plan my TV viewing from TV schedules  
 Turn off the TV before 21:00 if I'm still watching TV  
 Turn off the computer before 21:00 if I'm still on the Internet  
 Take a brisk walk for 10 minutes  
 Log in to my online banking and pay a bill  
 Entering my weekly activities in my calendar

**Social behaviors**

Texting a friend and ask what he / she does  
 Call a friend and ask what the situation is  
 Take a walk with a friend  
 Book a meeting with someone in my family  
 Suggest a coffee with a friend or family member  
 Suggest a lunch with a friend or family member  
 Go to the playground with my kids  
 Bake something with my children  
 Meet a friend in the evening and ask how your day was  
 Watching an episode of a TV series with a friend  
 Go to the movies with a friend  
 Cooking with someone

**New activities**

Buy or borrow a book I wanted to read  
 Read at least 20 minutes out of a book  
 Go to a new cafe and coffee  
 Look up the nearest training center is  
 Read on about training online  
 Post a workout plan for the week  
 Ask a friend if he / she wants to come along and train  
 Spend at least 30 minutes of physical activity  
 Listen to a radio program  
 Watch a documentary on TV  
 Eat a good meal out  
 Write down at least two good things that happened around me  
 Rent a movie and have a night in  
 Look up the exhibits that are in my city  
 See an exhibition at a museum  
 Look up the concerts that are relevant right now  
 Go to a concert  
 Look up current things happening in my city  
 Attend a church service  
 Solve a crossword  
 Make a Sudoku  
 Listen to music without doing anything else and focus on what I hear  
 Go to town and buy something nice for myself

**Table 3.** Means, SDs and effect sizes (Cohen's d) for measures of depression, anxiety, psychological flexibility and quality of life.

1  
2  
3  
4  
5  
6  
7  
8  
9  
10  
11  
12  
13  
14  
15  
16  
17  
18  
19  
20  
21  
22  
23  
24  
25  
26  
27  
28  
29  
30  
31  
32  
33  
34  
35  
36  
37  
38  
39  
40  
41  
42  
43  
44  
45  
46  
47  
48  
49  
50  
51  
52  
53  
54  
55  
56  
57  
58  
59  
60

- Formatted [1]
- Formatted [3]
- Formatted [2]
- Formatted [4]
- Formatted [5]
- Formatted Table [6]
- Formatted [7]
- Formatted [8]
- Formatted [9]
- Formatted [10]
- Formatted [11]
- Formatted [12]
- Formatted [13]
- Formatted [14]
- Formatted [15]
- Formatted [16]
- Formatted [17]
- Formatted [19]
- Formatted [20]
- Formatted [21]
- Formatted [22]
- Formatted [23]
- Formatted [24]
- Formatted [25]
- Formatted [18]
- Formatted [27]
- Formatted [28]
- Formatted [29]
- Formatted [30]
- Formatted [31]
- Formatted [32]
- Formatted [33]
- Formatted [26]
- Formatted [35]
- Formatted [36]
- Formatted [37]
- Formatted [38]
- Formatted [39]
- Formatted [40]
- Formatted [41]
- Formatted [34]
- Formatted [43]
- Formatted [44]
- Formatted [45]
- Formatted [46]
- Formatted [47]
- Formatted [48]
- Formatted [49]
- Formatted [42]
- Formatted [51]
- Formatted [52]
- Formatted [53]
- Formatted [54]
- Formatted [55]
- Formatted [56]
- Formatted [57]
- Formatted [50]
- Formatted [58]

| Outcome measure           | Mean (SD)     |                |                   | Effect size, d (95% CI) |                        |                        |                       |
|---------------------------|---------------|----------------|-------------------|-------------------------|------------------------|------------------------|-----------------------|
|                           | Pre-treatment | Post-treatment | 6-month follow-up | Between-group, pre-post | Between-group, pre-6FU | Within-group, pre-post | Within-group, pre-6FU |
| Total BDI-II              |               |                |                   |                         |                        |                        |                       |
| Behavioral activation BA  | 23.50 (7.85)  | 10.89 (5.92)   | 12.71 (10.56)     | 0.25 (-1.65-2.15)       | 0.03 (-2.63-2.69)      | 1.83 (0.27-3.38)       | 1.19 (-0.87-3.24)     |
| Mindfulness-MF            | 24.68 (9.47)  | 12.94 (10.18)  | 13.09 (12.24)     |                         |                        | 1.21 (-0.95-3.38)      | 1.09 (-1.32-3.50)     |
| PHQ-9                     |               |                |                   |                         |                        |                        |                       |
| Behavioral activation BA  | 12.53 (4.43)  | 5.83 (3.85)    | 6.77 (5.83)       | 0.28 (-0.85-1.40)       | 0.15 (-1.39-1.69)      | 1.63 (0.71-2.56)       | 1.14 (-0.01-2.28)     |
| Mindfulness-MF            | 13.22 (4.81)  | 7.19 (5.84)    | 7.74 (7.33)       |                         |                        | 1.15 (-0.02-2.32)      | 0.91 (-0.44-2.27)     |
| BAI                       |               |                |                   |                         |                        |                        |                       |
| Behavioral activation BA  | 14.60 (9.09)  | 8.81 (5.77)    | 8.34 (8.50)       | 0.06 (-1.49-1.61)       | 0.01 (-1.86-1.87)      | 0.76 (-0.95-2.47)      | 0.72 (-1.25-2.69)     |
| Mindfulness-MF            | 13.51 (9.31)  | 9.22 (7.68)    | 8.38 (7.48)       |                         |                        | 0.51 (-1.39-2.40)      | 0.61 (-1.30-2.51)     |
| AAQ-II                    |               |                |                   |                         |                        |                        |                       |
| Behavioral activation BA  | 27.28 (7.05)  | 21.22 (8.24)   | 20.09 (9.28)      | 0.22 (-1.97-2.41)       | 0.10 (-2.10-2.31)      | 0.80 (-0.89-2.50)      | 0.89 (-0.93-2.72)     |
| Mindfulness-MF            | 28.22 (7.09)  | 23.32 (10.82)  | 21.03 (9.68)      |                         |                        | 0.56 (-1.44-2.54)      | 0.87 (-1.00-2.74)     |
| QoLI                      |               |                |                   |                         |                        |                        |                       |
| Behavioral activation BA  | -0.45 (1.38)  | 0.92 (1.66)    | 1.15 (2.40)       | 0.05 (-0.36-0.45)       | 0.01 (-0.53-0.51)      | 0.91 (0.58-1.25)       | 0.84 (0.41-1.27)      |
| Mindfulness-MF            | -0.20 (1.51)  | 0.84 (1.90)    | 1.13 (2.07)       |                         |                        | 0.62 (0.24-0.99)       | 0.75 (0.36-1.15)      |
| H-L High level depression |               |                |                   |                         |                        |                        |                       |
| Behavioral activation BA  | 26.87 (7.14)  | 12.00 (6.31)   | 11.81 (10.63)     | 0.42 (-2.09-2.93)       | 0.39 (-2.95-3.73)      | 2.25 (0.33-4.18)       | 1.72 (-0.87-4.31)     |
| Mindfulness-MF            | 28.00 (8.61)  | 15.68 (10.76)  | 16.28 (12.71)     |                         |                        | 1.62 (-0.44-3.67)      | 1.32 (-1.07-3.71)     |
| PHQ-9                     |               |                |                   |                         |                        |                        |                       |
| Behavioral activation BA  | 15.52 (3.29)  | 6.64 (4.42)    | 6.48 (5.59)       | 0.36 (-1.17-1.90)       | 0.47 (-1.46-2.40)      | 2.34 (1.23-3.45)       | 2.04 (0.73-3.35)      |
| Mindfulness-MF            | 15.57 (3.35)  | 8.60 (6.29)    | 9.60 (7.71)       |                         |                        | 1.43 (0.13-2.74)       | 1.05 (-0.49-2.58)     |
| BAI                       |               |                |                   |                         |                        |                        |                       |
| Behavioral activation BA  | 17.43 (9.37)  | 9.18 (6.68)    | 9.62 (8.91)       | 0.20                    | 0.01                   | 1.03 (-1.30-3.37)      | 0.87 (-1.77-3.52)     |

1  
2  
3  
4  
5  
6  
7  
8  
9  
10  
11  
12  
13  
14  
15  
16  
17  
18  
19  
20  
21  
22  
23  
24  
25  
26  
27  
28  
29  
30  
31  
32  
33  
34  
35  
36  
37  
38  
39  
40  
41  
42  
43  
44  
45  
46  
47  
48  
49  
50  
51  
52  
53  
54  
55  
56  
57  
58  
59  
60

|                          |              |               |               |              |              |                   |                   |
|--------------------------|--------------|---------------|---------------|--------------|--------------|-------------------|-------------------|
| Behavioral activation BA | 15.57 (9.39) | 10.68 (8.39)  | 9.72 (7.91)   | (-1.94-2.34) | (-2.36-2.38) | 0.56 (-1.80-2.92) | 0.68 (-1.62-2.99) |
| Mindfulness-MF AAQ-II    | 28.27 (7.21) | 21.68 (8.90)  | 19.33 (9.27)  | 0.44         | 0.47         | 0.83 (-1.47-3.14) | 1.11 (-1.28-3.49) |
| Behavioral activation BA | 29.04 (6.50) | 25.87 (10.52) | 23.56 (9.33)  | (-2.30-3.18) | (-2.16-3.09) | 0.38 (-1.90-2.65) | 0.70 (-1.40-2.80) |
| Mindfulness-MF QoLI      | -0.51 (1.30) | 0.78 (1.58)   | 1.25 (2.07)   | 0.26         | 0.34         | 0.91 (0.50-1.33)  | 1.05 (0.56-1.55)  |
| Behavioral activation BA | -0.71 (1.18) | 0.38 (1.58)   | 0.53 (2.23)   | (-0.70-0.18) | (-0.95-0.27) | 0.80 (0.44-1.17)  | 0.72 (0.26-1.18)  |
| Mindfulness-MF BDI-II    | 18.94 (6.47) | 9.14 (4.96)   | 14.07 (10.71) | -0.51        | -1.2148      | 1.74 (-0.25-3.72) | 0.58 (-2.36-3.52) |
| Behavioral activation BA | 17.54 (7.09) | 6.73 (4.86)   | 4.22 (3.63)   | (-2.36-1.34) | 12.2371      | 1.83 (-0.54-4.19) | 2.35 (-0.03-4.72) |
| Mindfulness-MF PHQ-9     | 8.47 (1.59)  | 4.57 (2.34)   | 7.21 (6.36)   | -0.23        | -0.987       | 2.06 (1.39-2.72)  | 0.30 (-1.21-1.80) |
| Behavioral activation BA | 8.15 (3.34)  | 4.00 (2.86)   | 2.56 (1.51)   | (-1.20-0.74) | -2.6894      | 1.38 (0.19-2.59)  | 2.13 (1.03-3.23)  |
| Mindfulness-MF BAI       | 10.76 (7.33) | 8.21 (4.10)   | 6.43 (7.80)   | -0.56        | -0.27        | 0.43 (-1.64-2.51) | 0.59 (-1.98-3.16) |
| Behavioral activation BA | 9.08 (7.70)  | 5.91 (4.48)   | 4.67 (4.64)   | (-2.17-1.04) | (-2.92-2.38) | 0.51 (-1.95-2.98) | 0.67 (-1.95-3.34) |
| Mindfulness-MF AAQ-II    | 26.00 (6.85) | 20.50 (7.34)  | 21.21 (9.54)  | -0.37        | -0.87        | 0.80 (-1.61-3.21) | 0.61 (-2.17-3.39) |
| Behavioral activation BA | 26.46 (8.21) | 17.52 (9.54)  | 14.00 (7.07)  | (-3.52-2.78) | (-4.26-2.52) | 1.06 (-2.33-4.44) | 1.68 (-1.42-4.78) |
| Mindfulness-MF QoLI      | -0.37 (1.52) | 1.14 (1.83)   | 0.97 (2.15)   | -0.38        | -0.93        | 0.94 (0.37-1.50)  | 0.76 (0.13-1.38)  |
| Behavioral activation BA | 0.89 (1.61)  | 1.87 (2.24)   | 2.87 (2.10)   | (-0.38-1.14) | (-1.77-0.10) | 0.53 (-0.20-1.27) | 1.14 (0.41-1.87)  |

- Formatted ... [77]
- Formatted ... [78]
- Formatted ... [79]
- Formatted ... [80]
- Formatted ... [81]
- Formatted ... [82]
- Formatted ... [83]
- Formatted ... [76]
- Formatted ... [85]
- Formatted ... [86]
- Formatted ... [87]
- Formatted ... [88]
- Formatted ... [89]
- Formatted ... [90]
- Formatted ... [91]
- Formatted ... [84]
- Formatted ... [93]
- Formatted ... [94]
- Formatted ... [95]
- Formatted ... [96]
- Formatted ... [97]
- Formatted ... [98]
- Formatted ... [99]
- Formatted ... [92]
- Formatted ... [100]
- Formatted ... [101]
- Formatted ... [103]
- Formatted ... [104]
- Formatted ... [105]
- Formatted ... [106]
- Formatted ... [108]
- Formatted ... [109]
- Formatted ... [107]
- Formatted ... [102]
- Formatted ... [111]
- Formatted ... [112]
- Formatted ... [113]
- Formatted ... [114]
- Formatted ... [116]
- Formatted ... [117]
- Formatted ... [115]
- Formatted ... [110]
- Formatted ... [119]
- Formatted ... [120]
- Formatted ... [121]
- Formatted ... [122]
- Formatted ... [123]
- Formatted ... [124]
- Formatted ... [125]
- Formatted ... [118]
- Formatted ... [127]
- Formatted ... [128]
- Formatted ... [129]
- Formatted ... [130]
- Formatted ... [131]
- Formatted ... [132]
- Formatted ... [133]
- Formatted ... [126]

Abbreviations: BA: Behavioral activation; MF: Mindfulness; H-L Dep: High-level depression; L-L Dep:

1  
2  
3  
4  
5  
6  
7  
8  
9  
10  
11  
12  
13  
14  
15  
16  
17  
18  
19  
20  
21  
22  
23  
24  
25  
26  
27  
28  
29  
30  
31  
32  
33  
34  
35  
36  
37  
38  
39  
40  
41  
42  
43  
44  
45  
46  
47  
48  
49  
50  
51  
52  
53  
54  
55  
56  
57  
58  
59  
60

| Low-level depression: BDI-II: Beck Depression Inventory-II; PHQ-9: 9-item Patient Health Questionnaire Depression Scale; BAI: Beck Anxiety Inventory; AAQ-II: Acceptance and Action Questionnaire; QOLI: Quality of Life Inventory.

For peer review only



1  
2  
3  
4  
5  
6  
7  
8  
9  
10  
11  
12 **Page 23: [1] Formatted** **Kien Hoa Ly** **8/19/2013 1:08:00 PM**

13 Font: 7 pt

14  
15  
16 **Page 23: [2] Formatted** **Kien Hoa Ly** **8/19/2013 1:40:00 PM**

17 Tab stops: 0.56", Left + 2.81", Left

18  
19  
20 **Page 23: [3] Formatted** **Kien Hoa Ly** **8/19/2013 1:08:00 PM**

21 Font: 7 pt

22  
23  
24 **Page 23: [4] Formatted** **Kien Hoa Ly** **8/19/2013 1:08:00 PM**

25 Font: 7 pt

26  
27  
28 **Page 23: [5] Formatted** **Kien Hoa Ly** **8/19/2013 1:38:00 PM**

29 Space After: 0 pt

30  
31  
32 **Page 23: [6] Formatted Table** **Kien Hoa Ly** **8/19/2013 1:42:00 PM**

33 Formatted Table

34  
35  
36 **Page 23: [7] Formatted** **Kien Hoa Ly** **8/19/2013 1:08:00 PM**

37 Font: 7 pt

38  
39  
40 **Page 23: [8] Formatted** **Kien Hoa Ly** **8/19/2013 1:08:00 PM**

41 Font: 7 pt

42  
43  
44 **Page 23: [9] Formatted** **Kien Hoa Ly** **8/19/2013 1:08:00 PM**

45 Font: 7 pt

46  
47  
48 **Page 23: [10] Formatted** **Kien Hoa Ly** **8/19/2013 1:08:00 PM**

49 Font: 7 pt

50  
51  
52 **Page 23: [11] Formatted** **Kien Hoa Ly** **8/19/2013 1:08:00 PM**

53 Font: 7 pt

54  
55  
56 **Page 23: [12] Formatted** **Kien Hoa Ly** **8/19/2013 1:08:00 PM**

57 Font: 7 pt

58  
59  
60 **Page 23: [13] Formatted** **Kien Hoa Ly** **8/19/2013 1:08:00 PM**

Font: 7 pt

For peer review only - <http://bmjopen.bmj.com/site/about/guidelines.xhtml>

**Page 23: [14] Formatted** **Kien Hoa Ly** **8/19/2013 1:08:00 PM**

Font: 7 pt

1  
2  
3  
4  
5  
6  
7  
8  
9  
10  
11  
12  
13  
14  
15  
16  
17  
18  
19  
20  
21  
22  
23  
24  
25  
26  
27  
28  
29  
30  
31  
32  
33  
34  
35  
36  
37  
38  
39  
40  
41  
42  
43  
44  
45  
46  
47  
48  
49  
50  
51  
52  
53  
54  
55  
56  
57  
58  
59  
60

**Page 23: [15] Formatted** Kien Hoa Ly 8/19/2013 1:08:00 PM

Font: 7 pt

**Page 23: [16] Formatted** Kien Hoa Ly 8/19/2013 1:08:00 PM

Font: 7 pt

**Page 23: [17] Formatted** Kien Hoa Ly 8/19/2013 1:07:00 PM

Tab stops: 2.38", Left + Not at 2.33"

**Page 23: [18] Formatted** Kien Hoa Ly 8/19/2013 1:08:00 PM

Font: 7 pt

**Page 23: [19] Formatted** Kien Hoa Ly 8/19/2013 1:08:00 PM

Font: 7 pt

**Page 23: [20] Formatted** Kien Hoa Ly 8/19/2013 1:08:00 PM

Font: 7 pt

**Page 23: [21] Formatted** Kien Hoa Ly 8/19/2013 1:08:00 PM

Font: 7 pt

**Page 23: [22] Formatted** Kien Hoa Ly 8/19/2013 1:08:00 PM

Font: 7 pt

**Page 23: [23] Formatted** Kien Hoa Ly 8/19/2013 1:08:00 PM

Font: 7 pt

**Page 23: [24] Formatted** Kien Hoa Ly 8/19/2013 1:08:00 PM

Font: 7 pt

**Page 23: [25] Formatted** Kien Hoa Ly 8/19/2013 1:08:00 PM

Font: 7 pt

**Page 23: [26] Formatted** Kien Hoa Ly 8/19/2013 1:08:00 PM

Font: 7 pt

**Page 23: [27] Formatted** Kien Hoa Ly 8/19/2013 1:08:00 PM

Font: 7 pt

For peer review only - <http://bmjopen.bmj.com/site/about/guidelines.xhtml>

**Page 23: [28] Formatted** Kien Hoa Ly 8/19/2013 1:08:00 PM

Font: 7 pt

1  
2  
3  
4  
5  
6  
7  
8  
9  
10  
11  
12 **Page 23: [29] Formatted** **Kien Hoa Ly** **8/19/2013 1:08:00 PM**

13 Font: 7 pt

14  
15  
16 **Page 23: [30] Formatted** **Kien Hoa Ly** **8/19/2013 1:08:00 PM**

17 Font: 7 pt

18  
19  
20 **Page 23: [31] Formatted** **Kien Hoa Ly** **8/19/2013 1:08:00 PM**

21 Font: 7 pt

22  
23  
24 **Page 23: [32] Formatted** **Kien Hoa Ly** **8/19/2013 1:08:00 PM**

25 Font: 7 pt

26  
27  
28 **Page 23: [33] Formatted** **Kien Hoa Ly** **8/19/2013 1:08:00 PM**

29 Font: 7 pt

30  
31  
32 **Page 23: [34] Formatted** **Kien Hoa Ly** **8/19/2013 1:08:00 PM**

33 Font: 7 pt

34  
35  
36 **Page 23: [35] Formatted** **Kien Hoa Ly** **8/19/2013 1:08:00 PM**

37 Font: 7 pt

38  
39  
40 **Page 23: [36] Formatted** **Kien Hoa Ly** **8/19/2013 1:08:00 PM**

41 Font: 7 pt

42  
43  
44 **Page 23: [37] Formatted** **Kien Hoa Ly** **8/19/2013 1:08:00 PM**

45 Font: 7 pt

46  
47  
48 **Page 23: [38] Formatted** **Kien Hoa Ly** **8/19/2013 1:08:00 PM**

49 Font: 7 pt

50  
51  
52 **Page 23: [39] Formatted** **Kien Hoa Ly** **8/19/2013 1:08:00 PM**

53 Font: 7 pt

54  
55  
56 **Page 23: [40] Formatted** **Kien Hoa Ly** **8/19/2013 1:08:00 PM**

57 Font: 7 pt

58  
59  
60 **Page 23: [41] Formatted** **Kien Hoa Ly** **8/19/2013 1:08:00 PM**

Font: 7 pt

For peer review only - <http://bmjopen.bmj.com/site/about/guidelines.xhtml>

**Page 23: [42] Formatted** **Kien Hoa Ly** **8/19/2013 1:08:00 PM**

Font: 7 pt

1  
2  
3  
4  
5  
6  
7  
8  
9  
10  
11  
12 **Page 23: [43] Formatted** **Kien Hoa Ly** **8/19/2013 1:08:00 PM**

13 Font: 7 pt

14  
15  
16 **Page 23: [44] Formatted** **Kien Hoa Ly** **8/19/2013 1:08:00 PM**

17 Font: 7 pt

18  
19  
20 **Page 23: [45] Formatted** **Kien Hoa Ly** **8/19/2013 1:08:00 PM**

21 Font: 7 pt

22  
23  
24 **Page 23: [46] Formatted** **Kien Hoa Ly** **8/19/2013 1:08:00 PM**

25 Font: 7 pt

26  
27  
28 **Page 23: [47] Formatted** **Kien Hoa Ly** **8/19/2013 1:08:00 PM**

29 Font: 7 pt

30  
31  
32 **Page 23: [48] Formatted** **Kien Hoa Ly** **8/19/2013 1:08:00 PM**

33 Font: 7 pt

34  
35  
36 **Page 23: [49] Formatted** **Kien Hoa Ly** **8/19/2013 1:08:00 PM**

37 Font: 7 pt

38  
39  
40 **Page 23: [50] Formatted** **Kien Hoa Ly** **8/19/2013 1:08:00 PM**

41 Font: 7 pt

42  
43  
44 **Page 23: [51] Formatted** **Kien Hoa Ly** **8/19/2013 1:08:00 PM**

45 Font: 7 pt

46  
47  
48 **Page 23: [52] Formatted** **Kien Hoa Ly** **8/19/2013 1:08:00 PM**

49 Font: 7 pt

50  
51  
52 **Page 23: [53] Formatted** **Kien Hoa Ly** **8/19/2013 1:08:00 PM**

53 Font: 7 pt

54  
55  
56 **Page 23: [54] Formatted** **Kien Hoa Ly** **8/19/2013 1:08:00 PM**

57 Font: 7 pt

58  
59  
60 **Page 23: [55] Formatted** **Kien Hoa Ly** **8/19/2013 1:08:00 PM**

Font: 7 pt

For peer review only - <http://bmjopen.bmj.com/site/about/guidelines.xhtml>

**Page 23: [56] Formatted** **Kien Hoa Ly** **8/19/2013 1:08:00 PM**

Font: 7 pt



1  
2  
3  
4  
5  
6  
7  
8  
9  
10  
11  
12 **Page 23: [57] Formatted** **Kien Hoa Ly** **8/19/2013 1:08:00 PM**

13 Font: 7 pt

14  
15  
16 **Page 23: [58] Formatted** **Kien Hoa Ly** **8/19/2013 1:08:00 PM**

17 Font: 7 pt

18  
19  
20 **Page 23: [59] Formatted** **Kien Hoa Ly** **8/19/2013 1:08:00 PM**

21 Font: 7 pt

22  
23  
24 **Page 23: [60] Formatted** **Kien Hoa Ly** **8/19/2013 1:08:00 PM**

25 Font: 7 pt

26  
27  
28 **Page 23: [61] Formatted** **Kien Hoa Ly** **8/19/2013 1:08:00 PM**

29 Font: 7 pt

30  
31  
32 **Page 23: [62] Formatted** **Kien Hoa Ly** **8/19/2013 1:08:00 PM**

33 Font: 7 pt

34  
35  
36 **Page 23: [63] Formatted** **Kien Hoa Ly** **8/19/2013 1:08:00 PM**

37 Font: 7 pt

38  
39  
40 **Page 23: [64] Formatted** **Kien Hoa Ly** **8/19/2013 1:08:00 PM**

41 Font: 7 pt

42  
43  
44 **Page 23: [65] Formatted** **Kien Hoa Ly** **8/19/2013 1:08:00 PM**

45 Font: 7 pt

46  
47  
48 **Page 23: [66] Formatted** **Kien Hoa Ly** **8/19/2013 1:08:00 PM**

49 Font: 7 pt

50  
51  
52 **Page 23: [67] Formatted** **Kien Hoa Ly** **8/19/2013 1:08:00 PM**

53 Font: 7 pt

54  
55  
56 **Page 23: [68] Formatted** **Kien Hoa Ly** **8/19/2013 1:08:00 PM**

57 Font: 7 pt

58  
59  
60 **Page 23: [69] Formatted** **Kien Hoa Ly** **8/19/2013 1:08:00 PM**

Font: 7 pt

For peer review only - <http://bmjopen.bmj.com/site/about/guidelines.xhtml>

**Page 23: [70] Formatted** **Kien Hoa Ly** **8/19/2013 1:08:00 PM**

Font: 7 pt

1  
2  
3  
4  
5  
6  
7  
8  
9  
10  
11  
12 **Page 23: [71] Formatted** **Kien Hoa Ly** **8/19/2013 1:08:00 PM**

13 Font: 7 pt

14  
15  
16 **Page 23: [72] Formatted** **Kien Hoa Ly** **8/19/2013 1:08:00 PM**

17 Font: 7 pt

18  
19  
20 **Page 23: [73] Formatted** **Kien Hoa Ly** **8/19/2013 1:08:00 PM**

21 Font: 7 pt

22  
23  
24 **Page 23: [74] Formatted** **Kien Hoa Ly** **8/19/2013 1:08:00 PM**

25 Font: 7 pt

26  
27  
28 **Page 23: [75] Formatted** **Kien Hoa Ly** **8/19/2013 1:08:00 PM**

29 Font: 7 pt

30  
31  
32 **Page 24: [76] Formatted** **Kien Hoa Ly** **8/19/2013 1:08:00 PM**

33 Font: 7 pt

34  
35  
36 **Page 24: [77] Formatted** **Kien Hoa Ly** **8/19/2013 1:08:00 PM**

37 Font: 7 pt

38  
39  
40 **Page 24: [78] Formatted** **Kien Hoa Ly** **8/19/2013 1:08:00 PM**

41 Font: 7 pt

42  
43  
44 **Page 24: [79] Formatted** **Kien Hoa Ly** **8/19/2013 1:08:00 PM**

45 Font: 7 pt

46  
47  
48 **Page 24: [80] Formatted** **Kien Hoa Ly** **8/19/2013 1:08:00 PM**

49 Font: 7 pt

50  
51  
52 **Page 24: [81] Formatted** **Kien Hoa Ly** **8/19/2013 1:08:00 PM**

53 Font: 7 pt

54  
55  
56 **Page 24: [82] Formatted** **Kien Hoa Ly** **8/19/2013 1:08:00 PM**

57 Font: 7 pt

58  
59  
60 **Page 24: [83] Formatted** **Kien Hoa Ly** **8/19/2013 1:08:00 PM**

Font: 7 pt

For peer review only - <http://bmjopen.bmj.com/site/about/guidelines.xhtml>

**Page 24: [84] Formatted** **Kien Hoa Ly** **8/19/2013 1:08:00 PM**

Font: 7 pt

1  
2  
3  
4  
5  
6  
7  
8  
9  
10  
11  
12 **Page 24: [85] Formatted** **Kien Hoa Ly** **8/19/2013 1:08:00 PM**

13 Font: 7 pt

14  
15  
16 **Page 24: [86] Formatted** **Kien Hoa Ly** **8/19/2013 1:08:00 PM**

17 Font: 7 pt

18  
19  
20 **Page 24: [87] Formatted** **Kien Hoa Ly** **8/19/2013 1:08:00 PM**

21 Font: 7 pt

22  
23  
24 **Page 24: [88] Formatted** **Kien Hoa Ly** **8/19/2013 1:08:00 PM**

25 Font: 7 pt

26  
27  
28 **Page 24: [89] Formatted** **Kien Hoa Ly** **8/19/2013 1:08:00 PM**

29 Font: 7 pt

30  
31  
32 **Page 24: [90] Formatted** **Kien Hoa Ly** **8/19/2013 1:08:00 PM**

33 Font: 7 pt

34  
35  
36 **Page 24: [91] Formatted** **Kien Hoa Ly** **8/19/2013 1:08:00 PM**

37 Font: 7 pt

38  
39  
40 **Page 24: [92] Formatted** **Kien Hoa Ly** **8/19/2013 1:08:00 PM**

41 Font: 7 pt

42  
43  
44 **Page 24: [93] Formatted** **Kien Hoa Ly** **8/19/2013 1:08:00 PM**

45 Font: 7 pt

46  
47  
48 **Page 24: [94] Formatted** **Kien Hoa Ly** **8/19/2013 1:08:00 PM**

49 Font: 7 pt

50  
51  
52 **Page 24: [95] Formatted** **Kien Hoa Ly** **8/19/2013 1:08:00 PM**

53 Font: 7 pt

54  
55  
56 **Page 24: [96] Formatted** **Kien Hoa Ly** **8/19/2013 1:08:00 PM**

57 Font: 7 pt

58  
59  
60 **Page 24: [97] Formatted** **Kien Hoa Ly** **8/19/2013 1:08:00 PM**

Font: 7 pt

For peer review only - <http://bmjopen.bmj.com/site/about/guidelines.xhtml>

**Page 24: [98] Formatted** **Kien Hoa Ly** **8/19/2013 1:08:00 PM**

Font: 7 pt

1  
2  
3  
4  
5  
6  
7  
8  
9  
10  
11  
12 **Page 24: [99] Formatted** **Kien Hoa Ly** **8/19/2013 1:08:00 PM**

13 Font: 7 pt

14  
15  
16 **Page 24: [100] Formatted** **Kien Hoa Ly** **8/19/2013 1:08:00 PM**

17 Font: 7 pt

18  
19  
20 **Page 24: [101] Formatted** **Kien Hoa Ly** **8/19/2013 1:08:00 PM**

21 Font: 7 pt

22  
23  
24 **Page 24: [102] Formatted** **Kien Hoa Ly** **8/19/2013 1:08:00 PM**

25 Font: 7 pt

26  
27  
28 **Page 24: [103] Formatted** **Kien Hoa Ly** **8/19/2013 1:08:00 PM**

29 Font: 7 pt

30  
31  
32 **Page 24: [104] Formatted** **Kien Hoa Ly** **8/19/2013 1:08:00 PM**

33 Font: 7 pt

34  
35  
36 **Page 24: [105] Formatted** **Kien Hoa Ly** **8/19/2013 1:08:00 PM**

37 Font: 7 pt

38  
39  
40 **Page 24: [106] Formatted** **Kien Hoa Ly** **8/19/2013 1:08:00 PM**

41 Font: 7 pt

42  
43  
44 **Page 24: [107] Formatted** **Kien Hoa Ly** **8/19/2013 1:08:00 PM**

45 Font: 7 pt

46  
47  
48 **Page 24: [108] Formatted** **Kien Hoa Ly** **8/19/2013 1:08:00 PM**

49 Font: 7 pt

50  
51  
52 **Page 24: [109] Formatted** **Kien Hoa Ly** **8/19/2013 1:08:00 PM**

53 Font: 7 pt

54  
55  
56 **Page 24: [110] Formatted** **Kien Hoa Ly** **8/19/2013 1:08:00 PM**

57 Font: 7 pt

58  
59  
60 **Page 24: [111] Formatted** **Kien Hoa Ly** **8/19/2013 1:08:00 PM**

Font: 7 pt

For peer review only - <http://bmjopen.bmj.com/site/about/guidelines.xhtml>

**Page 24: [112] Formatted** **Kien Hoa Ly** **8/19/2013 1:08:00 PM**

Font: 7 pt

1  
2  
3  
4  
5  
6  
7  
8  
9  
10  
11  
12 **Page 24: [113] Formatted** **Kien Hoa Ly** **8/19/2013 1:08:00 PM**

13 Font: 7 pt

14  
15  
16 **Page 24: [114] Formatted** **Kien Hoa Ly** **8/19/2013 1:08:00 PM**

17 Font: 7 pt

18  
19  
20 **Page 24: [115] Formatted** **Kien Hoa Ly** **8/19/2013 1:08:00 PM**

21 Font: 7 pt

22  
23  
24 **Page 24: [116] Formatted** **Kien Hoa Ly** **8/19/2013 1:08:00 PM**

25 Font: 7 pt

26  
27  
28 **Page 24: [117] Formatted** **Kien Hoa Ly** **8/19/2013 1:08:00 PM**

29 Font: 7 pt

30  
31  
32 **Page 24: [118] Formatted** **Kien Hoa Ly** **8/19/2013 1:08:00 PM**

33 Font: 7 pt

34  
35  
36 **Page 24: [119] Formatted** **Kien Hoa Ly** **8/19/2013 1:08:00 PM**

37 Font: 7 pt

38  
39  
40 **Page 24: [120] Formatted** **Kien Hoa Ly** **8/19/2013 1:08:00 PM**

41 Font: 7 pt

42  
43  
44 **Page 24: [121] Formatted** **Kien Hoa Ly** **8/19/2013 1:08:00 PM**

45 Font: 7 pt

46  
47  
48 **Page 24: [122] Formatted** **Kien Hoa Ly** **8/19/2013 1:08:00 PM**

49 Font: 7 pt

50  
51  
52 **Page 24: [123] Formatted** **Kien Hoa Ly** **8/19/2013 1:08:00 PM**

53 Font: 7 pt

54  
55  
56 **Page 24: [124] Formatted** **Kien Hoa Ly** **8/19/2013 1:08:00 PM**

57 Font: 7 pt

58  
59  
60 **Page 24: [125] Formatted** **Kien Hoa Ly** **8/19/2013 1:08:00 PM**

Font: 7 pt

For peer review only - <http://bmjopen.bmj.com/site/about/guidelines.xhtml>

**Page 24: [126] Formatted** **Kien Hoa Ly** **8/19/2013 1:08:00 PM**

Font: 7 pt

1  
2  
3  
4  
5  
6  
7  
8  
9  
10  
11  
12 **Page 24: [127] Formatted** **Kien Hoa Ly** **8/19/2013 1:08:00 PM**

13 Font: 7 pt

14  
15  
16 **Page 24: [128] Formatted** **Kien Hoa Ly** **8/19/2013 1:08:00 PM**

17 Font: 7 pt

18  
19  
20 **Page 24: [129] Formatted** **Kien Hoa Ly** **8/19/2013 1:08:00 PM**

21 Font: 7 pt

22  
23  
24 **Page 24: [130] Formatted** **Kien Hoa Ly** **8/19/2013 1:08:00 PM**

25 Font: 7 pt

26  
27  
28 **Page 24: [131] Formatted** **Kien Hoa Ly** **8/19/2013 1:08:00 PM**

29 Font: 7 pt

30  
31  
32 **Page 24: [132] Formatted** **Kien Hoa Ly** **8/19/2013 1:08:00 PM**

33 Font: 7 pt

34  
35  
36 **Page 24: [133] Formatted** **Kien Hoa Ly** **8/19/2013 1:08:00 PM**

37 Font: 7 pt

38  
39  
40 **Page 24: [134] Formatted** **Kien Hoa Ly** **8/19/2013 1:08:00 PM**

41 Font: 7 pt

42  
43  
44 **Page 24: [135] Formatted** **Kien Hoa Ly** **8/19/2013 1:08:00 PM**

45 Font: 7 pt

46  
47  
48 **Page 24: [136] Formatted** **Kien Hoa Ly** **8/19/2013 1:08:00 PM**

49 Font: 7 pt

50  
51  
52 **Page 24: [137] Formatted** **Kien Hoa Ly** **8/19/2013 1:08:00 PM**

53 Font: 7 pt

54  
55  
56 **Page 24: [138] Formatted** **Kien Hoa Ly** **8/19/2013 1:08:00 PM**

57 Font: 7 pt

58  
59  
60 **Page 24: [139] Formatted** **Kien Hoa Ly** **8/19/2013 1:08:00 PM**

Font: 7 pt

For peer review only - <http://bmjopen.bmj.com/site/about/guidelines.xhtml>

**Page 24: [140] Formatted** **Kien Hoa Ly** **8/19/2013 1:08:00 PM**

Font: 7 pt

1  
2  
3  
4  
5  
6  
7  
8  
9  
10  
11  
12 **Page 24: [141] Formatted** **Kien Hoa Ly** **8/19/2013 1:08:00 PM**

13 Font: 7 pt

14  
15  
16 **Page 24: [142] Formatted** **Kien Hoa Ly** **8/19/2013 1:08:00 PM**

17 Font: 7 pt

18  
19  
20  
21  
22  
23  
24  
25  
26  
27  
28  
29  
30  
31  
32  
33  
34  
35  
36  
37  
38  
39  
40  
41  
42  
43  
44  
45  
46  
47  
48  
49  
50  
51  
52  
53  
54  
55  
56  
57  
58  
59  
60

For peer review only

1  
2  
3  
4  
5  
6  
7  
8  
9  
10  
11  
12  
13  
14  
15  
16  
17  
18  
19  
20  
21  
22  
23  
24  
25  
26  
27  
28  
29  
30  
31  
32  
33  
34  
35  
36  
37  
38  
39  
40  
41  
42  
43  
44  
45  
46  
47  
48  
49  
50  
51  
52  
53  
54  
55  
56  
57  
58  
59  
60

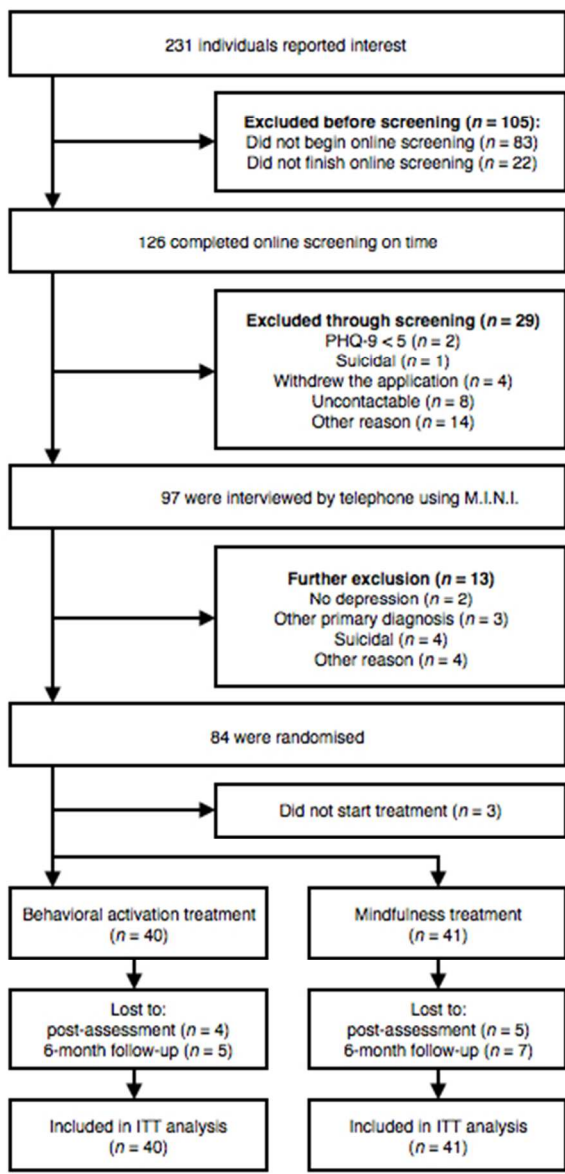

176x249mm (72 x 72 DPI)



1  
2  
3  
4  
5  
6  
7  
8  
9  
10  
11  
12  
13  
14  
15  
16  
17  
18  
19  
20  
21  
22  
23  
24  
25  
26  
27  
28  
29  
30  
31  
32  
33  
34  
35  
36  
37  
38  
39  
40  
41  
42  
43  
44  
45  
46  
47  
48  
49  
50  
51  
52  
53  
54  
55  
56  
57  
58  
59  
60

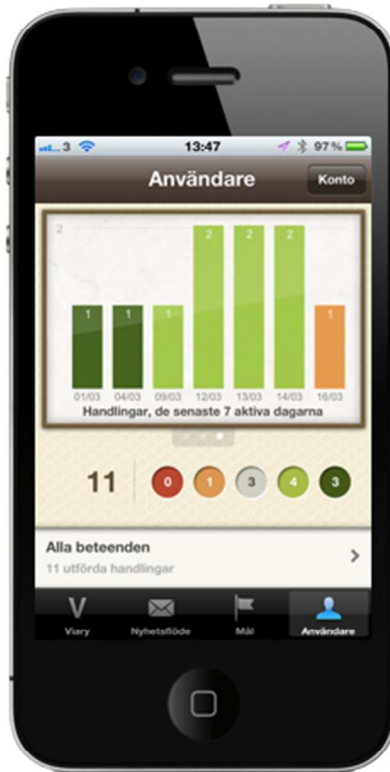

176x249mm (72 x 72 DPI)

1  
2  
3  
4  
5  
6  
7  
8  
9  
10  
11  
12  
13  
14  
15  
16  
17  
18  
19  
20  
21  
22  
23  
24  
25  
26  
27  
28  
29  
30  
31  
32  
33  
34  
35  
36  
37  
38  
39  
40  
41  
42  
43  
44  
45  
46  
47  
48  
49  
50  
51  
52  
53  
54  
55  
56  
57  
58  
59  
60

.....

.....

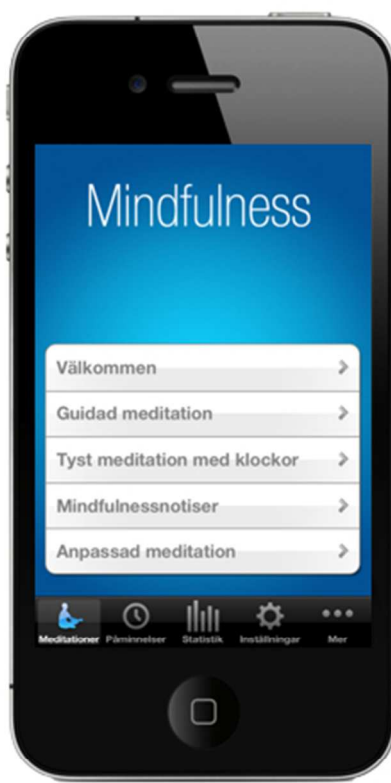

176x249mm (72 x 72 DPI)

CONSORT 2010 Flow Diagram

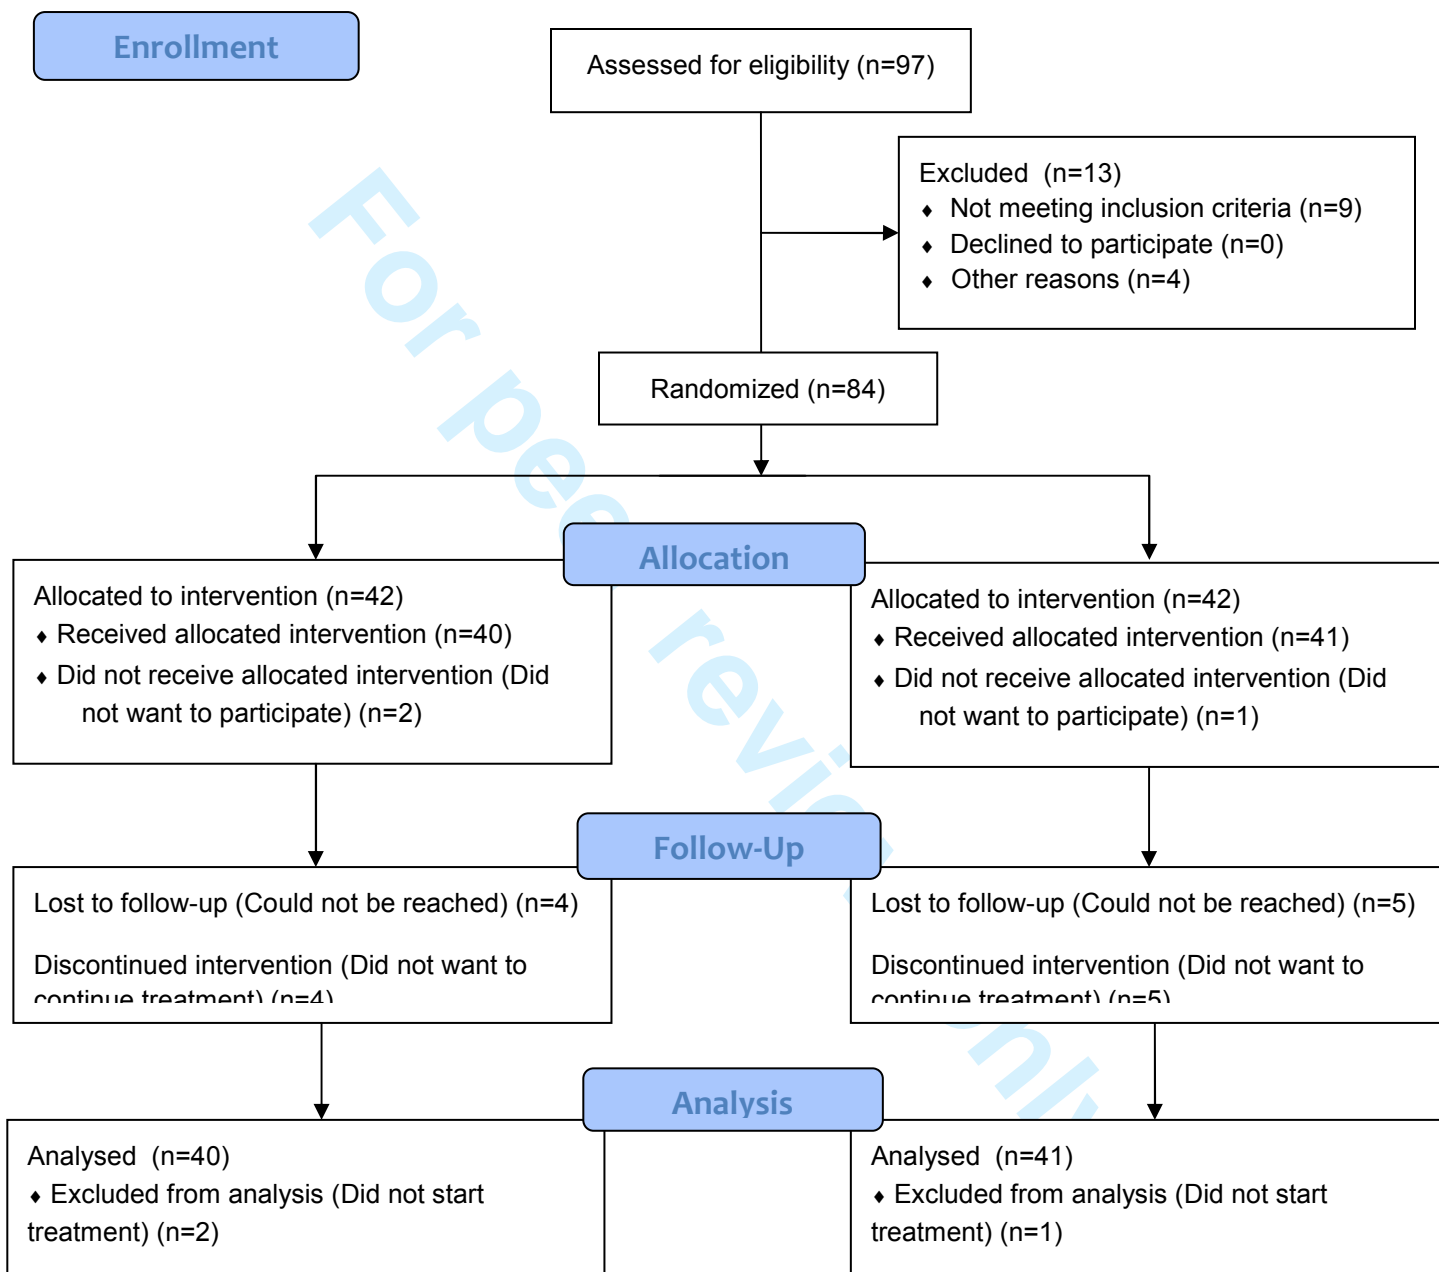

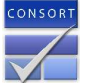

# CONSORT 2010 checklist of information to include when reporting a randomised trial\*

| Section/Topic                    | Item No | Checklist item                                                                                                                                                                              | Reported on page No |
|----------------------------------|---------|---------------------------------------------------------------------------------------------------------------------------------------------------------------------------------------------|---------------------|
| <b>Title and abstract</b>        |         |                                                                                                                                                                                             |                     |
|                                  | 1a      | Identification as a randomised trial in the title                                                                                                                                           | 1                   |
|                                  | 1b      | Structured summary of trial design, methods, results, and conclusions (for specific guidance see CONSORT for abstracts)                                                                     | 2-3                 |
| <b>Introduction</b>              |         |                                                                                                                                                                                             |                     |
| Background and objectives        | 2a      | Scientific background and explanation of rationale                                                                                                                                          | 3-5                 |
|                                  | 2b      | Specific objectives or hypotheses                                                                                                                                                           | 5                   |
| <b>Methods</b>                   |         |                                                                                                                                                                                             |                     |
| Trial design                     | 3a      | Description of trial design (such as parallel, factorial) including allocation ratio                                                                                                        | 7                   |
|                                  | 3b      | Important changes to methods after trial commencement (such as eligibility criteria), with reasons                                                                                          | N/A                 |
| Participants                     | 4a      | Eligibility criteria for participants                                                                                                                                                       | 5                   |
|                                  | 4b      | Settings and locations where the data were collected                                                                                                                                        | 7                   |
| Interventions                    | 5       | The interventions for each group with sufficient details to allow replication, including how and when they were actually administered                                                       | 7-8                 |
| Outcomes                         | 6a      | Completely defined pre-specified primary and secondary outcome measures, including how and when they were assessed                                                                          | 6                   |
|                                  | 6b      | Any changes to trial outcomes after the trial commenced, with reasons                                                                                                                       | N/A                 |
| Sample size                      | 7a      | How sample size was determined                                                                                                                                                              | 9                   |
|                                  | 7b      | When applicable, explanation of any interim analyses and stopping guidelines                                                                                                                | N/A                 |
| <b>Randomisation:</b>            |         |                                                                                                                                                                                             |                     |
| Sequence generation              | 8a      | Method used to generate the random allocation sequence                                                                                                                                      | 7                   |
|                                  | 8b      | Type of randomisation; details of any restriction (such as blocking and block size)                                                                                                         | 7                   |
| Allocation concealment mechanism | 9       | Mechanism used to implement the random allocation sequence (such as sequentially numbered containers), describing any steps taken to conceal the sequence until interventions were assigned | 7                   |
| Implementation                   | 10      | Who generated the random allocation sequence, who enrolled participants, and who assigned participants to interventions                                                                     | 7                   |
| Blinding                         | 11a     | If done, who was blinded after assignment to interventions (for example, participants, care providers, those assessing outcomes) and how                                                    | 6                   |

|    |                          |     |                                                                                                                  |
|----|--------------------------|-----|------------------------------------------------------------------------------------------------------------------|
| 1  |                          |     |                                                                                                                  |
| 2  |                          |     |                                                                                                                  |
| 3  |                          | 11b | If relevant, description of the similarity of interventions                                                      |
| 4  | Statistical methods      | 12a | Statistical methods used to compare groups for primary and secondary outcomes                                    |
| 5  |                          | 12b | Methods for additional analyses, such as subgroup analyses and adjusted analyses                                 |
| 6  |                          |     |                                                                                                                  |
| 7  | <b>Results</b>           |     |                                                                                                                  |
| 8  | Participant flow (a      | 13a | For each group, the numbers of participants who were randomly assigned, received intended treatment, and         |
| 9  | diagram is strongly      |     | were analysed for the primary outcome                                                                            |
| 10 | recommended)             | 13b | For each group, losses and exclusions after randomisation, together with reasons                                 |
| 11 | Recruitment              | 14a | Dates defining the periods of recruitment and follow-up                                                          |
| 12 |                          | 14b | Why the trial ended or was stopped                                                                               |
| 13 |                          |     |                                                                                                                  |
| 14 | Baseline data            | 15  | A table showing baseline demographic and clinical characteristics for each group                                 |
| 15 | Numbers analysed         | 16  | For each group, number of participants (denominator) included in each analysis and whether the analysis was      |
| 16 |                          |     | by original assigned groups                                                                                      |
| 17 |                          |     |                                                                                                                  |
| 18 | Outcomes and             | 17a | For each primary and secondary outcome, results for each group, and the estimated effect size and its            |
| 19 | estimation               |     | precision (such as 95% confidence interval)                                                                      |
| 20 |                          | 17b | For binary outcomes, presentation of both absolute and relative effect sizes is recommended                      |
| 21 | Ancillary analyses       | 18  | Results of any other analyses performed, including subgroup analyses and adjusted analyses, distinguishing       |
| 22 |                          |     | pre-specified from exploratory                                                                                   |
| 23 |                          |     |                                                                                                                  |
| 24 | Harms                    | 19  | All important harms or unintended effects in each group (for specific guidance see CONSORT for harms)            |
| 25 |                          |     |                                                                                                                  |
| 26 | <b>Discussion</b>        |     |                                                                                                                  |
| 27 | Limitations              | 20  | Trial limitations, addressing sources of potential bias, imprecision, and, if relevant, multiplicity of analyses |
| 28 | Generalisability         | 21  | Generalisability (external validity, applicability) of the trial findings                                        |
| 29 | Interpretation           | 22  | Interpretation consistent with results, balancing benefits and harms, and considering other relevant evidence    |
| 30 |                          |     |                                                                                                                  |
| 31 | <b>Other information</b> |     |                                                                                                                  |
| 32 | Registration             | 23  | Registration number and name of trial registry                                                                   |
| 33 | Protocol                 | 24  | Where the full trial protocol can be accessed, if available                                                      |
| 34 | Funding                  | 25  | Sources of funding and other support (such as supply of drugs), role of funders                                  |
| 35 |                          |     |                                                                                                                  |

\*We strongly recommend reading this statement in conjunction with the CONSORT 2010 Explanation and Elaboration for important clarifications on all the items. If relevant, we also recommend reading CONSORT extensions for cluster randomised trials, non-inferiority and equivalence trials, non-pharmacological treatments, herbal interventions, and pragmatic trials. Additional extensions are forthcoming: for those and for up to date references relevant to this checklist, see [www.consort-statement.org](http://www.consort-statement.org).



**Behavioral activation vs. Mindfulness-based guided self-help treatment administered through a smartphone application: a randomized controlled trial**

|                                 |                                                                                                                                                                                                                                                                                                                                                                                                                                                                                                                                                                                                                                                                                                                                          |
|---------------------------------|------------------------------------------------------------------------------------------------------------------------------------------------------------------------------------------------------------------------------------------------------------------------------------------------------------------------------------------------------------------------------------------------------------------------------------------------------------------------------------------------------------------------------------------------------------------------------------------------------------------------------------------------------------------------------------------------------------------------------------------|
| Journal:                        | <i>BMJ Open</i>                                                                                                                                                                                                                                                                                                                                                                                                                                                                                                                                                                                                                                                                                                                          |
| Manuscript ID:                  | bmjopen-2013-003440.R3                                                                                                                                                                                                                                                                                                                                                                                                                                                                                                                                                                                                                                                                                                                   |
| Article Type:                   | Research                                                                                                                                                                                                                                                                                                                                                                                                                                                                                                                                                                                                                                                                                                                                 |
| Date Submitted by the Author:   | 04-Dec-2013                                                                                                                                                                                                                                                                                                                                                                                                                                                                                                                                                                                                                                                                                                                              |
| Complete List of Authors:       | Ly, Kien Hoa; Linköping University, Department of Behavioural Sciences and Learning<br>Trüschel, Anna; Linköping University, Department of Behavioural Sciences and Learning<br>Jarl, Linnea; Linköping University, Department of Behavioural Sciences and Learning<br>Magnusson, Susanna; Linköping University, Department of Behavioural Sciences and Learning<br>Windahl, Tove; Linköping University, Department of Behavioural Sciences and Learning<br>Johansson, Robert; Linköping University, Department of Behavioural Sciences and Learning<br>Carlbring, Per; Stockholm University, Department of Psychology<br>Andersson, Gerhard; Karolinska Institutet, Department of Clinical Neuroscience, Center for Psychiatry Research |
| <b>Primary Subject Heading</b>: | Mental health                                                                                                                                                                                                                                                                                                                                                                                                                                                                                                                                                                                                                                                                                                                            |
| Secondary Subject Heading:      | Public health                                                                                                                                                                                                                                                                                                                                                                                                                                                                                                                                                                                                                                                                                                                            |
| Keywords:                       | Depression, Smartphone application, Behavioral activation, Mindfulness                                                                                                                                                                                                                                                                                                                                                                                                                                                                                                                                                                                                                                                                   |
|                                 |                                                                                                                                                                                                                                                                                                                                                                                                                                                                                                                                                                                                                                                                                                                                          |

SCHOLARONE™  
Manuscripts

# Behavioral activation vs. Mindfulness-based guided self-help treatment administered through a smartphone application: a randomized controlled trial

Kien Hoa Ly<sup>1§</sup>, Anna Trüschel<sup>1</sup>, Linnea Jarl<sup>1</sup>, Susanna Magnusson<sup>1</sup>, Tove Windahl<sup>1</sup>, Robert Johansson<sup>1</sup>, Per Carlbring<sup>2</sup>, Gerhard Andersson<sup>1,3</sup>

<sup>1</sup> Department of Behavioural Sciences and Learning, Linköping University, Linköping, Sweden

<sup>2</sup> Department of Psychology, Stockholm University, Stockholm, Sweden

<sup>3</sup> Department of Clinical Neuroscience, Center for Psychiatry Research, Karolinska Institutet, Stockholm, Sweden

§ Corresponding author

Email addresses:

KHL: kien.hoa.ly@liu.se

AT: annr005@student.liu.se

LJ: linja498@student.liu.se

SM: susma302@student.liu.se

TW: tovwi961@student.liu.se

RJ: robert.johansson@liu.se

PC: per@carlbring.se

GA: gerhard.andersson@liu.se

## Keywords

Depression, Behavioral activation, Smartphone application, Mindfulness.

# Abstract

## Objectives

Evaluating and comparing the effectiveness of two smartphone-delivered treatments; one based on behavioral activation (BA) and one on mindfulness.

## Design

Parallel randomized controlled, open, trial. Participants were allocated using an online randomization tool, handled by an independent person who was separate from the staff conducting the study.

## Setting

General community, with recruitment nationally through mass media and advertisements.

## Participants

40 participants diagnosed with major depressive disorder received a BA treatment, and 41 participants received a mindfulness treatment. 9 participants were lost at the post-treatment.

## Intervention

BA: An 8 week long behavior program administered via a smartphone application. Mindfulness: An 8 week long mindfulness program, administered via a smartphone application. □

## Main outcome measures

The Beck Depression Inventory-II (BDI-II) and the 9-item Patient Health Questionnaire Depression Scale (PHQ-9).

## Results

81 participants were randomized (mean age 36.0 years (SD=10.8)) and analyzed. Results showed no significant interaction effects of group and time on any of the outcome measures neither from pre-treatment to post-treatment nor from pre-treatment to the 6-month follow up. Subgroup analyses showed that the BA treatment was more effective than the mindfulness treatment among participants with higher initial severity of depression from pre-treatment to the 6-month follow up (PHQ-9:  $F(1, 362.1)=5.2, p's<.05$ ). In contrast, the mindfulness treatment worked better than the BA treatment among participants with lower initial severity from pre-treatment to the 6-month follow up (PHQ-9:  $F(1, 69.3)=7.7, p's<.01$ ); BDI-II: ( $F(1, 53.60)=6.25, p's<.05$ ).

## Conclusions

The two interventions did not differ significantly from one another. For participants with higher



1  
2  
3 severity of depression, the treatment based on BA was superior to the treatment based on  
4 mindfulness. For participants with lower initial severity, the treatment based on mindfulness  
5 worked significantly better than the treatment based on BA.  
6  
7

### 8 **Trial registration**

9  
10 Clinical Trials NCT01463020.  
11  
12

## 13 **Article Summary**

### 14 1) Article Focus

- 15  
16  
17  
18  
19 • It is well established that guided self-help interventions, administered through internet, can  
20 have positive effects on symptoms of depression. There are, however, to our knowledge no  
21 controlled trials on smartphone-delivered behavioral activation, neither on mindfulness.  
22  
23 • Both behavioral activation and mindfulness are components in multi-component treatment  
24 packages, and as such they might be easier to target in smartphone applications than an entire  
25 treatment program would be, due to the need of simple and fast interaction with the treatment  
26 program.  
27  
28 • The aim of this study was to test the effects of two smartphone-delivered treatments; one based  
29 on behavioral activation and the other on mindfulness. We expected that behavioral activation  
30 would be superior to mindfulness for participants suffering from more severe depression.  
31  
32

### 33 2) Key Messages

- 34  
35 • The large within-group effect sizes are comparable to other depression treatment and indicate  
36 that this smartphone format might work well for a depressed population.  
37  
38 • Behavioral activation might work better for a more severely depressed population, whereas  
39 mindfulness might work better for people suffering from light depression, at least in this  
40 smartphone format.  
41  
42 • Since smartphones likely will be integrated even further in society, they may be important in  
43 the future of making depression treatment and other psychological treatment more assimilated  
44 into people's daily life.  
45  
46

### 47 3) Strengths and Limitations.

- 48  
49 • One of the first to do a randomized controlled trial using smartphone applications.  
50  
51 • Did not control for the different components separately, so we cannot determine which parts of  
52 the treatments were effective.  
53  
54  
55  
56  
57  
58  
59  
60

## Background

Major depressive disorder (MDD) is a major health problem, which causes significant detrimental effects on the individual's quality of life and generates enormous costs for society<sup>1,2</sup>. Several forms of psychotherapy have been found to be effective in the treatment of MDD<sup>3</sup>. For example, behavioral activation (BA) has a strong empirical basis<sup>4</sup>. BA is an established psychological treatment derived from learning theory. It is aimed at increasing adequate behaviors and learning about the relations between behavior and mood. The efficacy of BA for treating MDD has been established in a number of studies over the past four decades<sup>5</sup>. Moreover, a dismantling study showed that BA could be as effective as the full cognitive behavior therapy (CBT) treatment package<sup>6</sup>. Moreover, in a later randomized controlled trial, BA was found to be as effective as antidepressant medication<sup>7</sup>.

It is also well established that guided self-help interventions, administered through the internet, can have positive effects on symptoms of depression<sup>8-10</sup>. An increasing number of studies show that this treatment format can be as effective as face-to-face treatment for mild to moderate MDD and anxiety disorders<sup>9</sup>. Guided treatments distributed digitally have provided a way to reach a larger number of patients in a manner that in most cases requires less therapist time than face-to-face psychotherapy, but with similar clinical outcome<sup>11</sup>. There are, however, to our knowledge no controlled trial of an internet-delivered intervention based solely on BA, and no study using smartphones for the delivery of BA, even if studies are being conducted on smartphone-administered CBT<sup>12</sup>, for example in the treatment of MDD<sup>13</sup>.

Like BA, mindfulness is often used as a component in multi-component treatment packages, such as mindfulness-based cognitive therapy (MBCT;<sup>14</sup>), dialectical behavior therapy (DBT;<sup>15</sup>), and acceptance and commitment therapy (ACT;<sup>16</sup>). Studies have shown a significant negative correlation between mindfulness and depression<sup>17,18</sup>, meaning that more mindfulness practice is associated with lower levels of depression. Moreover, a meta-analysis based on 39 studies of mindfulness for depression and anxiety showed a moderate effect size of Hedges's  $g=0.59$  for improving mood symptoms<sup>19</sup>. The analysis also showed that mindfulness was effective for individuals with depression both as primary and secondary diagnosis. Moreover, mindfulness has been shown to be effective in relapse prevention in depression with an overall risk ratio mean of 0.66 (95% CI [0.53, 0.82],  $p's < .01$ )<sup>20</sup>. Comorbid disorders such as anxiety have also been shown to be sensitive to mindfulness-based interventions<sup>21</sup>. Mindfulness has also appeared as a component in internet-based CBT treatments, but there have been few studies on mindfulness as a stand-alone, digitally distributed treatment for depression<sup>22</sup>.

Research suggests that depression severity is a significant moderating factor in the treatment of depression. There are also indications of a distinct difference between antidepressant medication and placebo in severe depression. Such a difference has not been verified in mild to moderate depression<sup>23</sup>, and that combined treatments with medication and psychotherapy are more effective than single treatments<sup>24</sup>. These results suggest that baseline depression severity may moderate the response to different variants of treatments. Thus, it is concluded that different treatments distributed digitally can target different subgroups of depression, in terms of severity. For example, Dimidjian et al.<sup>7</sup> found that among more severely depressed patients, behavioral

1  
2  
3 activation was as effective as antidepressant medication, and significantly outperformed  
4 cognitive therapy, whereas for the less severely depressed patients, no differential treatment  
5 effects were observed. However, in meta-analyses on BA versus cognitive therapy this has not  
6 been found<sup>24</sup>.  
7  
8

9  
10 The advantages as well as the challenges of using mobile phones in CBT treatment have been  
11 summarized by Boschen and Casey<sup>25</sup>. One challenge with using the mobile phone as a platform  
12 for psychological treatment is that the user must be able to interact with the program in an easy  
13 way<sup>25</sup>. In order to attain this simple and fast interaction, it might be easier to target specific  
14 treatment components than entire treatment programs in smartphone applications. This would  
15 make BA and mindfulness, both components in more extensive treatment packages, suitable  
16 targets for smartphone-based interventions. Another important feature of mobile technology is  
17 the possibility for the therapist to reach the patient outside of the therapy room or when not  
18 sitting in front of the computer, and thus create direct incentives for behavior change in the  
19 patient's everyday life<sup>25</sup>. Therefore, BA is a treatment that could benefit from the use of new  
20 mobile technologies (for example smartphones), even more than mindfulness, by creating direct  
21 incentives for BA in patient's everyday life.  
22  
23  
24  
25

26 In this study, we hypothesized that BA treatment delivered over smartphone would be more  
27 effective than mindfulness treatment delivered over smartphone. A meta-analysis by  
28 Mazzucchelli, Kane, and Rees<sup>26</sup> detected a significant moderate pooled effect size of Hedges's  
29  $g=0.33$  (Cohen's  $d=0.31$ ) when comparing BA with other psychological interventions, such as  
30 psychoeducation about depression, problem solving, assertiveness training and brief  
31 interventions. As such, we expected a moderate between group effect size (Cohen's  $d=0.50$ <sup>27</sup>) in  
32 this study. We also expected, in line with Dimidjian and coworkers' conclusion<sup>7</sup>, that BA would  
33 be superior to mindfulness for participants suffering from more severe depression (scored  $\geq 10$  on  
34 PHQ-9 and fulfilled the criteria for an ongoing primary diagnosis of major depression of  
35 moderate character). Since we did not test the effects of a full MBCT program but rather a brief  
36 version with fewer exercises, the mindfulness application was not hypothesized to be as effective  
37 as the BA. In addition, research has shown that depressed individuals in greater extent have  
38 deficits in cognitive functioning such as concentration difficulties, distractibility and  
39 impairments in memory, as well as problem in engaging in effortful cognitive processes<sup>28-31</sup>.  
40 Therefore, we concluded that the BA intervention would be more suitable for the more severely  
41 depressed participants since mindfulness require more cognitive functioning in initial stages,  
42 such as the ability to control attention in order to focus on the present moment<sup>32 33</sup>.  
43  
44  
45  
46  
47

48 The study was based on our previous work on guided internet-treatment for depression<sup>34</sup>, but in  
49 the current study the treatment content was delivered entirely via the participants' personal  
50 smartphones, using recently developed smartphone applications. The aim of this study was to  
51 test the effects of two smartphone-delivered treatments; one based on BA and the other one on  
52 mindfulness. Hence, the main question is whether BA is more effective than mindfulness  
53 delivered through a smartphone application. In order to evaluate long-term effects, we also  
54 included a 6-month follow-up after the start of the treatment.  
55  
56  
57  
58  
59  
60

## Methods

### Ethics statement

The study was approved by the Regional Ethics Board of Linköping, Sweden. Written informed consent was obtained from all participants by surface mail before the study started.

### Recruitment and selection

The participants were mainly recruited via mass media and advertisements in large Swedish newspapers. Those who were interested were directed to a web page with information about the study, the treatments being tested and how to participate in the study.

Inclusion criteria for the study were a) being at least 18 years old, b) having a point total of  $\geq 5$  on PHQ-9, c) reported unchanged dosage of medication for depression and anxiety during the last month, d) not being in any concurrent psychological treatment, e) not suffering from a severe comorbid psychiatric condition that could interfere with the treatment (e.g. bipolar disorder or schizophrenia, assessed during a clinical interview), f) not having other primary medical problems which would need other treatments first hand, g) not having severe alcohol problems, h) no assessed risk of being suicidal (see below for details) and i) suffering from major depression according to the DSM-IV, with at least an episode in partial remission. The diagnosis of MDD was confirmed by a structured interview (see below). Additionally, an assessment of suicidal ideation was conducted. The interviews were conducted over telephone by four MSc clinical psychology students. The principal research executive reviewed all the protocols from the interviews together with the interviewers.

Of the 231 individuals who initially expressed interest in the study, 126 completed all the questions in the online screening (22 did not finish the screening and 83 did not begin the screening). Of these, 29 were excluded before the diagnostic interview started. The most common reason for exclusion was an ongoing psychological treatment. Other reasons for exclusion were wrong type of mobile phone (i.e. not having access to a smartphone) and score under 5 on the PHQ-9. 13 individuals were excluded after the diagnostic interview. The most common reason was that the participant was considered to be in need of another kind of treatment. 84 participants were subsequently included. Before the study started, 3 participants chose not to participate. Hence, 81 participants were finally included in the data analysis. The reasons for exclusion are specified in the flowchart found in Figure 1.

[Insert Figure 1 about here]

Among the randomized participants there were 70.3 % women ( $n=57$ ) and 29.6 % men ( $n=24$ ). The mean age was 36.0 years ( $SD=10.8$ ) ranging from 20 to 61 years. See Table 1 for additional demographical data.

### Outcome measures

1  
2  
3 **Primary outcome measures.** The primary outcome measures were the Beck Depression  
4 Inventory-II (BDI-II; <sup>35</sup>) and the 9-item Patient Health Questionnaire Depression Scale (PHQ-9;  
5 <sup>36 37</sup>) that were administered pre-treatment, at post-treatment and also six months after the  
6 treatment had ended. The PHQ-9 was also administered on a weekly basis during the entire  
7 treatment phase (8 weeks). Hence, there were 3 measurements on the outcome BDI-II and 10  
8 measurements on the outcome PHQ-9 (including pre-treatment, post-treatment and six months  
9 follow up).  
10  
11

12  
13 **Secondary outcome measures.** In addition to the BDI-II and PHQ-9, the Beck Anxiety  
14 Inventory (BAI; <sup>38</sup>), the Quality of Life Inventory (QOLI; <sup>39 40</sup>) and the Acceptance and Action  
15 Questionnaire (AAQ-II; <sup>41</sup>) were administered. The AAQ-II was administered on a weekly basis  
16 during the entire treatment phase (8 weeks). All other outcome measures were collected at pre-  
17 treatment, post-treatment and at 6-month after the start of the treatment. Hence, there were 3  
18 measurements on the outcomes BAI and QOLI and 10 measurements on the outcome AAQ-II  
19 (including pre-treatment, post-treatment and six months follow up). All outcome measures used  
20 have been shown to have good psychometric properties, with internal consistencies of at least  
21  $\alpha = .79$ . Details of this can be found in the respective references of the outcome questionnaires.  
22  
23  
24  
25

26 **Clinician-administered measures.** Psychiatric diagnoses were assessed at pre-treatment, post-  
27 treatment and at follow-up 6 months after the start of the treatment, using the Mini-International  
28 Neuropsychiatric Interview (M.I.N.I.; <sup>42</sup>). The M.I.N.I. is a diagnostic interview that, in contrast  
29 to several other diagnostic interviews, is completely structured, making it appropriate for other  
30 assessors than experienced psychiatrists <sup>42</sup>. All interviews were conducted over telephone by the  
31 four psychology students described above, which at post-treatment were blind to participants'  
32 treatment condition. At the 6-month follow-up, the interviews were conducted by other clinical  
33 psychology students who were blind to both the participant's condition and the treatment they  
34 had been given. Recovery rates were defined as no longer fulfilling the criteria for depression  
35 according to M.I.N.I.  
36  
37  
38  
39

40 **Treatment credibility.** To measure participants' perceived treatment credibility, Borkovec and  
41 Nau's Credibility/expectancy scale (C-Scale)<sup>43</sup> was used. The C-scale measures the way in  
42 which participants view the logic of the treatment (credibility) and the improvements that can be  
43 achieved (expectancy) and includes five items on a 10-point scale. Assessment was made after  
44 the first week of treatment.  
45  
46  
47

#### 48 **Administration format of self-report measures**

49 We used an online platform to administer the BDI-II, PHQ-9, BAI, QOLI, AAQ-II and the C-  
50 scale. Previous psychometric research has validated internet-administration of self-rating scales  
51 for depression, quality of life and anxiety <sup>44-46</sup>.  
52  
53  
54

#### 55 **Procedure and design**

56 For those participants included in the study, the results from the online screening were used as  
57  
58  
59  
60

1  
2  
3 pre-treatment assessment. After the recruitment, participants were allocated using an online  
4 randomization tool ([www.random.org](http://www.random.org)), handled by an independent person who was separate  
5 from the staff conducting the study.  
6  
7

## 8 9 **The interventions**

10 **Behavioral activation treatment.** An 8-week smartphone-based BA intervention with minimal  
11 therapist contact (maximum time of 20 minutes per participant and week) was developed by our  
12 research group. The intervention consisted of a short web-based psychoeducation, and a step-by-  
13 step behavior program administered via a smartphone application. The psychoeducation aimed to  
14 introduce the participants to the treatment and establish a minimum level of knowledge  
15 concerning MDD, touching on topics like the prevalence of depression, its etiology and  
16 maintenance factors based on operant conditioning, as well as the theoretical basis for BA. The  
17 text in the web-based psychoeducation was written specially for the current intervention, but  
18 inspired by the BA treatment manuals of Martell et al.<sup>47</sup> and Lejuez, Hopko & Hopko<sup>48</sup>. In all,  
19 there were 3 chapters, totaling 11 pages of text, containing 3 893 words.  
20  
21  
22  
23

24 The smartphone application was built as a native application for Iphone, meaning that the  
25 application was coded in a specific programming language (Objective C), and as a mobile web  
26 application for other smartphones. See Figure 2 for a screenshot of the application. A prototype  
27 of the smartphone application was tested in a pilot study<sup>49</sup>. This prototype, however, was not  
28 specifically designed for depression interventions. The purpose of the BA application was to  
29 make it easy for the participant to remember and register important behaviors, in order to  
30 increase everyday activation. The application contained a database of 54 behaviors, divided into  
31 3 different areas for the participant to add to their application. See Table 2 for the list of  
32 behaviors from the database. The database aimed to provide suggestions, help, and inspiration to  
33 get started with the application. Participants were also able to add their own areas and behaviors  
34 into the application and start performing and registering these Through the initial  
35 psychoeducation, the participants were advised to add only a few (between two and four)  
36 behaviors initially, mainly from the existing database, and to choose behaviors that were easy to  
37 perform.  
38  
39  
40  
41  
42

43 When a behavior was completed, for example: *Get ready in the morning*, the participant could  
44 register this in the application and add a short reflection. Statistics and summaries of quantitative  
45 (i.e. behavior frequency) and qualitative data (i.e. reflections) were presented in the application  
46 for the participant.  
47  
48

49 There was also a back-end system where all the quantitative and qualitative data from the  
50 participants was accessible from a website for the therapist. From the back-end system, the  
51 therapist could send short text messages to the participants via a messaging system, similar to  
52 Short Message Service (SMS). The messaging system was used by the therapists (described  
53 below) to send personal encouraging messages every other or every third day to the participants,  
54 as well as weekly general educational messages. The system functioned as a one-way  
55 communication, meaning that the participants were not able to reply to the messages. The  
56  
57  
58  
59  
60

1  
2  
3 participants were also told to write a reflection to summarize every week for their therapist, and  
4 send it via e-mail by the end of every treatment week. The participants received personal  
5 feedback on their reflection from their therapist via e-mail. No sensitive data, through which the  
6 person providing data could be identified, was saved. In addition, all internet (including the  
7 therapists' back-end system) and smartphone activities (including the participants' mobile  
8 application) were secured, with SSL-encrypted information.  
9  
10

11  
12 [Insert Figure 2 about here]  
13  
14

15  
16 **Mindfulness treatment.** The mindfulness intervention, also an 8-week smartphone-based  
17 intervention with minimal therapist contact (maximum time of 20 minutes per participant and  
18 week), consisted of a short web-based psychoeducation, and a step-by-step mindfulness practice  
19 program, administered via a smartphone application. The psychoeducation for the mindfulness  
20 intervention was equivalent to that of the BA intervention, except that the theoretical basis for  
21 mindfulness was presented instead of the theoretical basis for BA. The text was written  
22 especially for the current intervention, with inspiration from the self help book *The Mindful Way*  
23 *Through Depression* by Williams et al.<sup>50</sup>. In all, there were 3 chapters, totaling 9 pages of text,  
24 containing 2 927 words.  
25  
26

27  
28 The smartphone application for Iphone was an established and commercially available  
29 application that could be downloaded from the internet. See Figure 3 for a screenshot of the  
30 application. For other smartphones, a mobile web application was built especially for the current  
31 study with the aim of mimicking the Iphone application. The application consisted of a number  
32 of audio tracks with exercises to facilitate the practice of mindfulness. The exercises were both  
33 guided and unguided, and in both short (3 minutes) and long (30 minutes) format. Through the  
34 initial psychoeducation, the participants were advised to begin with short mindfulness exercises,  
35 such as a guided 3-minute mindfulness exercise, which was one of the audio tracks in the  
36 application.  
37  
38

39  
40 Since the mindfulness application did not have a communication function such as the BA  
41 application, e-mails were used to emulate the messaging system in the BA application. Hence,  
42 the therapists sent encouraging messages every other, or every third day to the participants, as  
43 well as weekly general educational messages via mail. The difference in how the therapists  
44 communicated in the mindfulness intervention, compared to the BA intervention, was that the  
45 therapists could not give specific feedback on activities or exercises that the participants had  
46 performed. Otherwise, the communication was similar (length and type of guided content in the  
47 feedback). Additionally, the participants given the mindfulness intervention were also asked to  
48 write a weekly reflection to summarize their work and thoughts on the current treatment week,  
49 and send this reflection to their therapist via e-mail. The participants received personal feedback  
50 on their reflection from their therapist.  
51  
52  
53  
54

55  
56 [Insert Figure 3 about here]  
57  
58  
59  
60

1  
2  
3 **Therapists.** The therapists were four final-semester students from a five-year M.Sc. clinical  
4 psychologist program. All therapists had completed their clinical training as well as 16 weeks of  
5 practice. Each therapist was responsible for the treatment of 8 to 10 participants from the BA  
6 group and an equal number of participants from the mindfulness group. Therapists were  
7 randomly allocated to participants, with the restriction of not having more than 10 participants  
8 from each group. For the entire duration of the study the therapists received continuous  
9 supervision from an experienced psychotherapist with CBT orientation, who had previous  
10 experience of working with a BA treatment manual, as well as mindfulness in depression  
11 treatment.  
12  
13

### 14 15 16 **Subgroups based on cut-off scores**

17 All randomized participants were classified into groups of either high or low severity of  
18 depression. These classes were formed based on the cut-off scores on the PHQ-9. The  
19 participants were considered to suffer from higher severity of depression if they scored  $\geq 10$  on  
20 PHQ-9 and if they fulfilled the criteria for an ongoing primary diagnosis of major depression of  
21 moderate character ( $n=51$ ). Participants not fulfilling these criteria were considered to suffer  
22 from lower severity of depression ( $n=30$ ).  
23  
24

### 25 26 27 28 **Data analysis**

29 All analyses were performed using SPSS 20 (SPSS, Inc., Chicago, IL). Independent  $t$ -tests and  
30  $\chi^2$ -tests were used to test for group differences in demographics, pre-treatment data and in  
31 recovery rates. In order to adhere to the intention-to-treat principle, the continuous outcome  
32 variables were analyzed using mixed effects models, given their ability to handle missing data<sup>51</sup>.  
33 All analyses used Maximum Likelihood estimation. Random intercept models were selected for  
34 all measures. Differences between the BA treatment and the mindfulness treatment were  
35 primarily investigated by modeling interaction effects of group and time. For the PHQ-9 and the  
36 AAQ-II, where weekly measures were available, the covariance between the random intercept  
37 and slope was not significant, and therefore was not included in the model. Hence, a random  
38 intercept model was used also for these measures. Between-group differences at post-treatment  
39 were analyzed using independent  $t$ -tests. Power analysis indicated an 89 % chance of detecting a  
40 between-group effect size of  $d=0.60$  ( $\alpha$  level=0.05, one tailed). Within- and between-group effect  
41 sizes (Cohen's  $d$ ) were calculated by dividing the differences in means by the pooled standard  
42 deviations<sup>52</sup>. This was done both from pre-measurements to post-measurements, and from pre-  
43 measurements to the 6-month follow up data.  
44  
45  
46  
47  
48  
49

### 50 51 **Results**

52 The two groups did not differ significantly on any of the measures at pre-treatment ( $t=0.50$  to  
53  $0.67$ ,  $df=79$ ,  $p=0.78$  to  $0.50$ ). Also, there was no significant difference in demographic  
54 characteristics between the groups according to chi-square analysis ( $\chi^2=0.01$  to  $1.03$ ,  $df=1$ ,  
55  $p=0.22$  to  $0.57$ ). See Table 1 for demographical data. See Table 3 for all outcome measurements  
56 at pre-treatment, post-treatment and at 6-month follow-up. The results will be presented in the  
57  
58  
59  
60



1  
2  
3 following order: attrition and adherence, self-report inventories (including effect size) both for  
4 the whole sample and the subgroups, recovery rates and treatment credibility.  
5  
6

### 7 **Attrition and adherence**

8  
9 Of the 84 participants randomized, 3 participants decided not to participate in the study. Nine out  
10 of these 81 participants (11.1 %) did not provide post-treatment data with a distribution of four  
11 participants from the BA group and five participants from the mindfulness group. Six out of the  
12 81 participants (totaling 7.4 %) were unreachable for the M.I.N.I. telephone interview and were  
13 classified as unimproved in the data analysis. In the 6-month follow-up, 69 participants from the  
14 two treatment groups (totaling 85.2 %) provided data on the self-report measures, with a  
15 distribution of 35 participants from the BA group and 34 participants from the mindfulness  
16 group. 59 participants (72.8 %) were reached for the M.I.N.I. telephone interview. Once again,  
17 those unreachable were classified as unimproved in the data analysis.  
18

19  
20 In a study by Andersson et al<sup>53</sup>, the number of postings in a discussion group was used as a  
21 process factor. Therefore, we defined adherence to treatment as the number of weekly reflections  
22 the participants sent to their therapist. In order to be considered as a completed week, at least one  
23 reflection had to have been sent to the therapist during that week. Of the 81 participants, 57  
24 (70 %) succeeded to adhere to all the 8 weeks. Of these, 25 (63 %) were in the BA group and 32  
25 (78 %) were in the mindfulness group. No significant difference in adherence was found between  
26 the two groups ( $\chi^2(N=81, df=1)=2.35, p=1.00$ ). In average, participants succeeded to adhere to  
27 six weeks ( $M=5.8, SD=2.47$ ).  
28  
29

### 30 **Primary outcome measures**

31  
32 No significant interaction effects of group and time on the PHQ-9 and the BDI-II were found  
33 between the groups, neither from pre-treatment to post-treatment (PHQ-9: ( $F(1, 501.47)=.28,$   
34  $p's=.60$ ); BDI-II: ( $F(1, 74.11)=.28, p's=.60$ )), nor from pre-treatment to the 6-month follow up  
35 (PHQ-9: ( $F(1, 571.49)=.36, p's=.55$ ); BDI-II: ( $F(1, 147.96)=.09, p's=.77$ )). However, as evident  
36 from Table 3, large within-group effect sizes were found on PHQ-9 and BDI-II, between pre-  
37 treatment and post-treatment, as well as between pre-treatment to the 6-month follow up. This  
38 was the case for both the BA treatment and the mindfulness-treatment.  
39  
40  
41

### 42 **Subgroup analyses**

43  
44 For the participants (total  $n=51$ , BA  $n=23$ , MF  $n=28$ ) suffering from high severity of depression  
45 ( $\geq 10$  on the PHQ-9 and an ongoing primary diagnosis of major depression of moderate  
46 character), a mixed-effects model analysis on the PHQ-9 revealed significant interaction effects  
47 of group and time in favor for the BA group from pre-treatment to 6-month follow-up, but not on  
48 pre-treatment to post-treatment. Thus, the results indicated a difference between the BA group  
49 and the mindfulness group from pre-treatment to 6-month follow-up ( $F(1, 362.1)=5.2, p's<.05$ )  
50 for the participants suffering from higher severity of depression. As seen in Table 3, the effect  
51 size between the groups at 6-month follow-up was moderate (Cohen's  $d=0.47$ ; CI [-1.46, 2.40]).  
52 No difference between the groups from pre-treatment to post-treatment was found  
53  
54  
55

56  
57 For the more mildly depressed participants (total  $n=30$ , BA  $n=17$ , MF  $n=13$ ) there was a  
58  
59  
60

1  
2  
3 significant effect in favor of the mindfulness group from pre-treatment to 6-month follow-up on  
4 both the PHQ-9 ( $F(1, 69.3)=7.7, p's<.01$ ) and the BDI-II ( $F(1, 53.60)=6.25, p's<.05$ ). The effect  
5 sizes were, as evident from Table 3, large (PHQ-9: Cohen's  $d=0.98$ ; CI [-0.72, 2.68]; BDI-II:  
6 Cohen's  $d=1.21$ ; CI [-1.71, 4.13]). No difference between the groups from pre-treatment to post-  
7 treatment was found.  
8  
9

### 10 11 **Secondary outcome measures**

12 As evident from Table 3 no significant interaction effects were found on the secondary measures  
13 between the groups, neither from pre-treatment to post-treatment (BAI: ( $F(1, 74.05)=1.30,$   
14  $p's=.26$ ); AAQ-II: ( $F(1, 570.00)=.07, p's=.79$ ); QOLI: ( $F(1, 76.43)=1.06, p's=.31$ )), nor from  
15 pre-treatment to the 6-month follow up (BAI: ( $F(1, 147.01)=.35, p's=.56$ ); AAQ-II: ( $F(1,$   
16  $639.00)=.11, p's=.74$ ); QOLI: ( $F(1, 148.61)=.39, p's=.53$ )). Nevertheless, as shown in table 3,  
17 medium to large within-group effect sizes were revealed on all secondary outcome measures.  
18 This was evident for both groups, and on pre-treatment to post-treatment, as well as on pre-  
19 treatment to the 6-month follow up.  
20  
21  
22  
23

### 24 **Recovery rates**

25 Recovery rates were defined as no longer fulfilling the criteria for depression according to  
26 M.I.N.I. There were no significant differences in recovery rates between the groups, neither at  
27 post-treatment nor at the 6-month follow-up. This was the case both when analyzing the whole  
28 sample as well as the subgroups. When analyzing the whole sample ( $n=81$ ), 73.5 % ( $n=25$ ) in the  
29 BA group recovered at post-treatment, compared to 53.1 % ( $n=17$ ) in the mindfulness group  
30 ( $\chi^2(N=66, df=1)=2.97, p=.07$ ). At the 6-month follow-up, 30 out of 34 participants (88.2 %) from  
31 the BA group had recovered, and 26 out of 32 participants (81.3 %) from the mindfulness group  
32 had recovered ( $\chi^2(N=66, df=1)=.63, p=.33$ ).  
33  
34  
35  
36

37 When analyzing only the severe depressed participants, there was a tendency in favor for the BA  
38 group. Among the severely depressed participants, 73.9 % ( $n=17$ ) in the BA group recovered at  
39 post-treatment, compared to 50.0 % ( $n=14$ ) in the mindfulness group ( $\chi^2(N=51, df=1)=3.03,$   
40  $p=.07$ ). At the 6-month follow-up, 21 out of 23 participants (91.3 %) from the BA group had  
41 recovered, and 22 out of 28 participants (78.6 %) from the mindfulness group had recovered  
42 ( $\chi^2(N=51, df=1)=1.55, p=.20$ ).  
43  
44  
45

46 Among the less severe depressed participants, 82.4 % ( $n=14$ ) in the BA group recovered at post-  
47 treatment, compared to 92.3 % ( $n=12$ ) in the mindfulness group ( $\chi^2(N=30, df=1)=.63, p=.41$ ). At  
48 the 6-month follow-up, the number of participants from the BA group that had recovered  
49 remained the same as in the post-measurement ( $n=14$ ). In the mindfulness group all participants  
50 ( $n=13$ ) from the mindfulness group had recovered at the 6-month follow-up ( $\chi^2(N=30,$   
51  $df=1)=2.549, p=.17$ ), however no significant differences in recovery rates between the groups  
52 was found when analyzing only the less severe depressed participants.  
53  
54  
55

### 56 **Treatment credibility and therapist time**

1  
2  
3 Treatment credibility ratings (C-scale) after one week of treatment showed that participants in  
4 both groups rated their respective treatment as credible. Out of a possible total of 50, the average  
5 scores were 31.9 ( $SD=7.1$ ) for the BA group and 32.1 ( $SD=7.8$ ) for the mindfulness group. There  
6 was no significant difference in treatment credibility between the two groups ( $t(78)=0.12$ ,  
7  $p=0.90$ ). Furthermore, treatment credibility did not correlate significantly with any of the  
8 outcome measures, either for all participants combined ( $r=0.13$ ,  $p=0.27$ ), for the BA group  
9 ( $r=0.01$ ,  $p=0.92$ ) or for the mindfulness group ( $r=.23$ ,  $p=.18$ ).  
10  
11  
12

13  
14 The therapist time per participant and week varied depending on whether the participant had sent  
15 a reflection or not. The therapists reported a span between 2 and 18 minutes per week and  
16 participant. The therapists reported that the time they spent did not differ between the two  
17 treatment groups.  
18  
19

## 20 Discussion

21  
22 The overall aim of this study was to evaluate and compare the effects of two smartphone-  
23 delivered treatments for people suffering from mild to moderate major depression; one based on  
24 BA and the other on mindfulness. Hence, the main question was whether BA is more effective  
25 than mindfulness delivered through a smartphone application. We hypothesized that BA  
26 treatment delivered via smartphone would be more effective than mindfulness treatment  
27 delivered via smartphone. We also expected that BA would be superior to mindfulness for  
28 participants suffering from more severe depression. When analyzing the whole sample as one  
29 entity, the result showed that the two interventions did not differ significantly from one another;  
30 neither from pre-treatment to post-treatment, nor from pre-treatment to the 6-month follow-up on  
31 any of the outcome measures. Also, there were no significant differences in recovery rates  
32 between the groups, neither at post-treatment nor at the 6-month follow-up.  
33  
34  
35  
36

37  
38 This study also explored how different levels of initial depression severity could moderate  
39 response to the different interventions. All randomized participants were classified into either  
40 high or low severity of depression based on the cut-offs scores on the PHQ-9 and whether they  
41 fulfilled the criteria for an ongoing primary diagnosis of major depression. For participants with  
42 higher severity of depression, the treatment based on BA was superior to the treatment based on  
43 mindfulness, as measured with PHQ-9. In contrast, for participants with lower initial severity,  
44 the treatment based on mindfulness was more effective than the treatment based on BA, as  
45 measured with PHQ-9 and BDI-II.  
46  
47  
48

49  
50 The result from the analysis of the higher severity participants is in line with Dimidjian et al's  
51 finding<sup>7</sup>. In contrast to the meta-analysis by Cuijpers et al<sup>24</sup>, Dimidjian et al<sup>7</sup> found that BA  
52 was comparable in efficacy to antidepressant medication, and more efficacious than cognitive  
53 therapy - but only among those patients who were more severely depressed. Since it is known  
54 that depressed individuals in greater extent have concentration difficulties, distractibility and  
55 problems in engaging in effortful cognitive processes<sup>28-31</sup>, Beck and colleagues<sup>54</sup> have long  
56 suggested that therapists should focus on behavioral strategies early in treatment when patients  
57 are more depressed and return to that emphasis later if patients start to worsen. We expected that  
58  
59  
60

1  
2  
3 the BA intervention would be more suitable for the more severely depressed participants since  
4 mindfulness require more cognitive functioning in initial stages, such as the ability to control  
5 attention in order to focus on the present moment<sup>32 33</sup>.  
6  
7

8 The result from the analysis of the less severely depressed participants was unexpected to us.  
9 Although there is yet only initial evidence that mindfulness treatment is effective for acute or  
10 severely depressed patients<sup>55 56</sup>, mindfulness has proven to be effective for relapse prevention of  
11 recurrent depression<sup>20 57 58</sup>. A possible explanation of the results could be that there was a  
12 difference between the two treatment groups, although not significant, in the number of  
13 participants that were suffering from major depression. In the BA group 64.7% ( $n=11$ ) were  
14 diagnosed with major depression in the initial screening, compared to 30.8 % ( $n=4$ ) in the  
15 mindfulness group ( $\chi^2(N=30, df=1)=3.39, p=.07$ ).  
16  
17

18  
19 Moreover, the results showed significant improvements from pre-treatment to post-treatment on  
20 the primary outcome measures in both treatment conditions with large within-group effect sizes  
21 and large recovery rates, comparable to other depression treatments<sup>59 60</sup>. This might indicate that  
22 the smartphone format used in this study could work well for a depressed population. However, a  
23 replication with a waiting list group should be conducted to rule out the possibility that the  
24 effects occurred due to natural recovery.  
25  
26  
27

## 28 **Limitations**

29  
30 There are a number of limitations that need to be mentioned. The first is that no waiting list  
31 group was included. Although our main research question was to assess whether behavioral  
32 activation is more effective than mindfulness delivered via smartphone, a control group given no  
33 intervention would have yielded a more clear result.  
34  
35

36 A second limitation is that the study was underpowered. Thus, it is difficult to detect significant  
37 overall differences between the two smartphone-treatments, even if significant interaction effects  
38 were found when using mixed effects models with PHQ-9 in the subgroup analyses. A post-hoc  
39 power analysis revealed that a sample of 393 participants was required to detect small between-  
40 group effects. We did not expect that the mindfulness treatment would be as effective and  
41 powered the trial as if a moderate between-group effect would be found.  
42  
43

44 A third limitation was that the participants were recruited nationally through mass media and  
45 advertisements. Thus, we cannot be sure that this treatment would work in a clinical setting, e.g.  
46 an outpatient psychiatric facility. However, mean depression severity as measured by the BDI-II  
47 at intake ( $M=24.10$ ) is rather close to the limit of 29, proposed for defining severe depression<sup>35</sup>,  
48 meaning that the depression severity in this study was comparable to an outpatient psychiatric  
49 population.  
50  
51

52 Fourth, we recruited a broad range of participants, with regards to severity of depression (a  
53 minimum of 8 and a maximum of 44 on BDI-II at intake). This makes it difficult to target a  
54 specific group for whom the treatments would be most effective. Nevertheless, a subgroup  
55 analysis showed that participants with higher severity of depression responded significantly  
56 better to the BA than to the treatment based on mindfulness, whereas the treatment based on  
57 mindfulness worked significantly better than the treatment based on BA for the participants with  
58  
59  
60

1  
2  
3 lower initial depression severity. Additionally, it can be argued that these broad inclusion criteria  
4 reflect a real population (i.e. an outpatient psychiatric population) of individuals with depressive  
5 disorders. However, this contributed to power limitations as well.  
6  
7

8 A fifth related concern was the large number of participants that had college- or university level  
9 education (65.5 %). This might compromise generalizability of the results, since it is possible  
10 that guided self-help is especially well suited for educated patients. However, there is data  
11 indicating that 50 % of patients seeking psychotherapy have some college education<sup>61</sup> and that  
12 educated patients may be more inclined to seek help for mental health problems in general<sup>62</sup>.  
13  
14

## 15 16 **Conclusion**

17 Some clinical implications of this study are discussed as follows. Due to the need for simple and  
18 fast interaction with the treatment program, singular treatment components such as BA and  
19 mindfulness might be a better target for smartphone applications than entire multi-component  
20 treatment packages. At the same time, there is a need for guided self-help treatments distributed  
21 digitally that can reach out to more patients. This study is one of the first to test a treatment for  
22 depression, administered via smartphone. The large within-group effects on the primary outcome  
23 measures, as well as the large recovery rates for both groups, are comparable to other depression  
24 treatments and indicate that this smartphone format with a small amount of text and minimal  
25 therapist support might work well for a depressed population. However, as mentioned above, a  
26 replication with a waiting list group should be conducted to rule out that the effects occurred due  
27 to natural recovery.  
28  
29  
30  
31

32 Moreover, this study also shows that BA might work better for a more severely depressed  
33 population, whereas mindfulness might work better for people suffering from light depression.  
34 These results suggest that different treatments distributed digitally can target different subgroups  
35 of depressed patients in terms of severity. However, more studies are needed to strengthen this  
36 hypothesis before any conclusions can be drawn.  
37  
38  
39

40 From a broader perspective, we believe that smartphones will be integrated even further in  
41 society since they are already socially accepted and come at relatively low costs considering their  
42 functionalities<sup>25</sup>, and therefore may serve an important role in health care. Therefore these  
43 results, showing that mild to moderate major depression can be treated effectively by means of a  
44 supported smartphone-application, might be important in making depression treatment and other  
45 psychological treatments more assimilated into people's daily life. As suggested in Ly et al.<sup>49</sup>,  
46 the smartphone format might also help increasing patients' awareness of being in treatment, even  
47 in everyday settings, and therefore better help patients create direct incentives for treatment  
48 related activities in their everyday life<sup>49</sup>. Using smartphones to distribute psychological  
49 treatment might also help making it possible to reach out with psychological therapy to a broader  
50 group of people, since their use attracts no attention<sup>25</sup>, allowing users to interact with a device  
51 without fear of judgment or stigma. Lastly, psychological treatments distributed via smartphones  
52 are not only relevant for Swedish conditions but also for the developing countries of the world,  
53 which increasingly are empowered by mobile phones with internet connection.  
54  
55  
56  
57  
58  
59  
60

1  
2  
3 This study might pave the way for a broad range of other trials conducted via smartphones, both  
4 self-help interventions and face-to-face treatments with the smartphone as an adjunct tool. We  
5 believe that a substantial part of internet-based interventions in the future will be executed  
6 through smartphones or at least supported by smartphones. Further studies should focus on both  
7 formats, as well as expanding the treatment platform to other psychological disorders.  
8  
9  
10  
11  
12  
13  
14  
15  
16  
17  
18  
19  
20  
21  
22  
23  
24  
25  
26  
27  
28  
29  
30  
31  
32  
33  
34  
35  
36  
37  
38  
39  
40  
41  
42  
43  
44  
45  
46  
47  
48  
49  
50  
51  
52  
53  
54  
55  
56  
57  
58  
59  
60

For peer review only

## Authors' contributions

KHL was the project manager and has developed the application. KHL also participated in the drafting of the treatment manuals, and participated in analysis and interpretation of data. GA was the principal research executive and participated in the conception of the study and its design. GA also participated in the drafting of treatment manuals, analysis and interpretation of data, and performed statistical analysis. PC participated in the conception of the study and its design. RJ participated in analysis and interpretation of data, and performed statistical analysis. AT, LJ, SM and TW participated in the drafting of treatment manuals and performed the treatments. KHL and GA drafted the current manuscript. PC and RJ participated in revision of the current manuscript. All authors read and approved the final manuscript.

## Funding

The Swedish Research Council sponsored this study with funding. 2011-2476

## Trial protocol

The full trial protocol can be found at: <http://www.trialsjournal.com/content/13/1/62>

## Trial registration

Clinical Trials NCT01463020

## Competing interests

A related version of the BA application is currently developed for the open market by KHL.

## Data Sharing Statement

Additional unpublished data from the study includes answers from the Trimbos and Institute of Medical Technology Assessment Cost Questionnaire for Psychiatry (TIC-P), which is used to measure cost data from a psychological treatment. This extra data is available by emailing [kien.hoa.ly@liu.se](mailto:kien.hoa.ly@liu.se)

## References

1. Ebmeier K, Donaghey C, Steele J. Recent developments and current controversies in depression. *Lancet* 2006;367:153 - 67.
2. Smit F, Cuijpers P, Oostenbrink J, Batelaan N, de Graaf R, Beekman A. Costs of nine common mental disorders: implications for curative and preventive psychiatry. *J Ment Health Policy Econ* 2006;9:193 - 200.
3. Cuijpers P, van Straten A, Andersson G, van Oppen P. Psychotherapy for depression in adults: a meta-analysis of comparative outcome studies. *J Consult Clin Psychol* 2008;76(6):909-22.
4. Cuijpers P, van Straten A, Warmerdam L. Behavioral activation treatments of depression: a meta-analysis. *Clin Psychol Rev* 2007;27:318 - 26.
5. Dimidjian S, Barrera M, Martell C, Munoz R, Lewinsohn P. The origins and current status of behavioral activation treatments for depression. *Annu Rev Clin Psych* 2011;7:1 - 38.
6. Jacobson N, Dobson K, Truax P, Addis M, Koerner K, Gollan J, et al. A component analysis of cognitive-behavioral treatment for depression. *J Consult Clin Psych* 1996;64:295 - 304.
7. Dimidjian S, Hollon SD, Dobson KS, Schmalzing KB, Kohlenberg RJ, Addis ME, et al. Randomized trial of behavioral activation, cognitive therapy, and antidepressant medication in the acute treatment of adults with major depression. *J Consult Clin Psychol* 2006;74(4):658-70.
8. Andrews G, Cuijpers P, Craske MG, McEvoy P, Titov N. Computer Therapy for the Anxiety and Depressive Disorders Is Effective, Acceptable and Practical Health Care: A Meta-Analysis. *PLoS ONE* 2010;5(10):e13196.
9. Cuijpers P, Donker T, van Straten A, Li J, Andersson G. Is guided self-help as effective as face-to-face psychotherapy for depression and anxiety disorders? A systematic review and meta-analysis of comparative outcome studies. *Psychol Med* 2010;40(12):1943-57.
10. Carlbring P, Hagglund M, Luthstrom A, Dahlin M, Kadowaki A, Vernmark K, et al. Internet-based behavioral activation and acceptance-based treatment for depression: A randomized controlled trial. *Journal of affective disorders* 2013;148(2-3):331-7.
11. Andersson G. Using the Internet to provide cognitive behaviour therapy. *Behav Res Ther* 2009;47(3):175-80.
12. Rizvi SL, Dimeff LA, Skutch J, Carroll D, Linehan MM. A pilot study of the DBT coach: an interactive mobile phone application for individuals with borderline personality disorder and substance use disorder. *Behav Ther* 2011;42(4):589-600.
13. Watts S, Mackenzie A, Thomas C, Griskaitis A, Mewton L, Williams A, et al. CBT for depression: a pilot RCT comparing mobile phone vs. computer. *BMC psychiatry* 2013;13:49.
14. Segal ZV, Williams JMG. *Mindfulness-based cognitive therapy for depression*: Guilford Press, 2012.
15. Linehan M. *Cognitive-behavioral treatment of borderline personality disorder*: The Guilford Press, 1993.
16. Hayes SC, Strosahl KD, Wilson KG. *Acceptance and commitment therapy: An experiential approach to behavior change*: Guilford Press New York, 2003.
17. Cash M, Whittingham K. What facets of mindfulness contribute to psychological well-being and depressive, anxious, and stress-related symptomatology? *Mindfulness* 2010;1(3):177-82.
18. Brown KW, Ryan RM. The benefits of being present: mindfulness and its role in psychological well-being. *J Pers Soc Psychol* 2003;84(4):822-48.
19. Hofmann SG, Sawyer AT, Witt AA, Oh D. The effect of mindfulness-based therapy on anxiety and depression: A meta-analytic review. *J Consult Clin Psychol* 2010;78(2):169-83.



- 1
  - 2
  - 3
  - 4
  - 5
  - 6
  - 7
  - 8
  - 9
  - 10
  - 11
  - 12
  - 13
  - 14
  - 15
  - 16
  - 17
  - 18
  - 19
  - 20
  - 21
  - 22
  - 23
  - 24
  - 25
  - 26
  - 27
  - 28
  - 29
  - 30
  - 31
  - 32
  - 33
  - 34
  - 35
  - 36
  - 37
  - 38
  - 39
  - 40
  - 41
  - 42
  - 43
  - 44
  - 45
  - 46
  - 47
  - 48
  - 49
  - 50
  - 51
  - 52
  - 53
  - 54
  - 55
  - 56
  - 57
  - 58
  - 59
  - 60
20. Piet J, Hougaard E. The effect of mindfulness-based cognitive therapy for prevention of relapse in recurrent major depressive disorder: a systematic review and meta-analysis. *Clinical psychology review* 2011;31(6):1032-40.
21. Hofmann SG, Sawyer AT, Witt AA, Oh D. The effect of mindfulness-based therapy on anxiety and depression: A meta-analytic review. *Journal of consulting and clinical psychology* 2010;78(2):169.
22. Ljotsson B, Hedman E, Lindfors P, Hursti T, Lindefors N, Andersson G, et al. Long-term follow-up of internet-delivered exposure and mindfulness based treatment for irritable bowel syndrome. *Behav Res Ther* 2011;49(1):58-61.
23. Fournier JC, DeRubeis RJ, Hollon SD, Dimidjian S, Amsterdam JD, Shelton RC, et al. Antidepressant drug effects and depression severity: a patient-level meta-analysis. *JAMA* 2010;303(1):47-53.
24. Cuijpers P, Andersson G, Donker T, van Straten A. Psychological treatment of depression: results of a series of meta-analyses. *Nord J Psychiatry* 2011;65(6):354-64.
25. Boschen M, Casey L. The use of mobile telephones as adjuncts to cognitive behavioral psychotherapy. *Prof Psychol-Res Pr* 2008;39:546 - 52.
26. Mazzucchelli T, Kane R, Rees C. Behavioral Activation Treatments for Depression in Adults: A Meta-Analysis and Review. *Clinical Psychology: Science and Practice* 2009;16(4):383-411.
27. Cohen J. Statistical power analysis. *Current directions in psychological science* 1992;1(3):98-101.
28. Clak DA, Beck AT. *Scientific foundations of cognitive theory and therapy of depression*: Wiley. com, 1999.
29. Gotlib IH, Joormann J. Cognition and depression: current status and future directions. *Annual review of clinical psychology* 2010;6:285.
30. Ellis HC, Ashbrook PW. Resource allocation model of the effects of depressed mood states on memory. *Affect, cognition and social behavior* 1988:25-43.
31. Watts FN, Sharrock R. Description and measurement of concentration problems in depressed patients. *Psychological Medicine* 1985;15(02):317-26.
32. Bishop SR. What do we really know about mindfulness-based stress reduction? *Psychosomatic medicine* 2002;64(1):71-83.
33. Tang Y-Y, Posner MI. Attention training and attention state training. *Trends in cognitive sciences* 2009;13(5):222-27.
34. Andersson G, Bergstrom J, Hollandare F, Carlbring P, Kaldø V, Ekselius L. Internet-based self-help for depression: randomised controlled trial. *The British journal of psychiatry : the journal of mental science* 2005;187:456-61.
35. Beck AT, Steer RA, Brown BK. *Beck Depression Inventory manual*, 1996.
36. Titov N, Dear BF, McMillan D, Anderson T, Zou J, Sunderland M. Psychometric Comparison of the PHQ-9 and BDI-II for Measuring Response during Treatment of Depression. *Cognitive Behaviour Therapy* 2011;40(2):126-36.
37. Kroenke K, Spitzer R, Williams J. The PHQ-9: validity of a brief depression severity measure. *J Gen Intern Med* 2001;16:606 - 13.
38. Beck A, Epstein N, Brown G, Steer R. An inventory for measuring clinical anxiety: psychometric properties. *J Consult Clin Psych* 1988;56:893 - 97.
39. Lindner PA, G.; Ost, L.-G.; Carlbring, P. Validation of the Internet-administered Quality of Life Inventory (QOLI) in different psychiatric conditions. *Cognitive Behaviour Therapy* in press.
40. Frisch M, Cornell J, Villanueva M. Clinical validation of the Quality of life inventory: a measure of life satisfaction for use in treatment planning and outcome assessment. *Psychol Assessment* 1992;4:92 - 101.
41. Hayes S, Strosahl K, Bunting K, Twohig M, Wilson K. What is Acceptance and Commitment Therapy? *A Practical Guide to Acceptance and Commitment Therapy* 2004:1 - 30.

- 1  
2  
3  
4  
5  
6  
7  
8  
9  
10  
11  
12  
13  
14  
15  
16  
17  
18  
19  
20  
21  
22  
23  
24  
25  
26  
27  
28  
29  
30  
31  
32  
33  
34  
35  
36  
37  
38  
39  
40  
41  
42  
43  
44  
45  
46  
47  
48  
49  
50  
51  
52  
53  
54  
55  
56  
57  
58  
59  
60
42. Sheehan DV, Lecrubier Y, Sheehan KH, Amorim P, Janavs J, Weiller E, et al. The Mini-International Neuropsychiatric Interview (M.I.N.I.): the development and validation of a structured diagnostic psychiatric interview for DSM-IV and ICD-10. *J Clin Psychiatry* 1998;59 Suppl 20:22-33;quiz 34-57.
  43. Borkovec TD, Nau SD. Credibility of analogue therapy rationales. *Journal of Behavior Therapy and Experimental Psychiatry* 1972;3(4):257-60.
  44. Carlbring P, Brunt S, Bohman S, Austin D, Richards J, Ost L-G, et al. Internet vs. paper and pencil administration of questionnaires commonly used in panic/agoraphobia research. *Computers in Human Behavior* 2007;23(3):1421-34.
  45. Hedman E, Ljótsson B, Rück C, Furmark T, Carlbring P, Lindefors N, et al. Internet administration of self-report measures commonly used in research on social anxiety disorder: A psychometric evaluation. *Computers in Human Behavior* 2010;26(4):736-40.
  46. Hollandare F, Andersson G, Engstrom I. A comparison of psychometric properties between internet and paper versions of two depression instruments (BDI-II and MADRS-S) administered to clinic patients. *J Med Internet Res* 2010;12(5):e49.
  47. Martell CR, Addis ME, Jacobson NS. *Depression in context: Strategies for guided action*: WW Norton & Co, 2001.
  48. Lejuez CW, Hopko DR, Hopko SD. A brief behavioral activation treatment for depression treatment manual. *Behavior Modification* 2001;25(2):255-86.
  49. Ly K, Dahl J, Carlbring P, Andersson G. Development and initial evaluation of a smartphone application based on acceptance and commitment therapy. *SpringerPlus* 2012;1(1):11.
  50. Williams JMG, Teasdale JD, Segal ZV. *The mindful way through depression: Freeing yourself from chronic unhappiness*: The Guilford Press, 2007.
  51. Gueorguieva R, Krystal JH. Move over ANOVA: progress in analyzing repeated-measures data and its reflection in papers published in the Archives of General Psychiatry. *Arch Gen Psychiatry* 2004;61(3):310-7.
  52. Borenstein M, Hedges LV, Higgins JP, Rothstein HR. *Introduction to meta-analysis*: Wiley, 2011.
  53. Andersson G, Bergström J, Hollvång F, Ekselius L, Carlbring P. Delivering cognitive behavioural therapy for mild to moderate depression via the Internet: predicting outcome at 6-month follow-up. *Verhaltenstherapie* 2004;14(3):185-89.
  54. Beck AT. *Cognitive therapy of depression*: The Guilford Press, 1979.
  55. Manicavasgar V, Parker G, Perich T. Mindfulness-based cognitive therapy vs cognitive behaviour therapy as a treatment for non-melancholic depression. *J Affect Disord* 2011;130(1-2):138-44.
  56. Kenny MA, Williams JM. Treatment-resistant depressed patients show a good response to Mindfulness-based Cognitive Therapy. *Behav Res Ther* 2007;45(3):617-25.
  57. *Psykologisk behandling vid depression : teorier, terapimetoder och forskning A1 - Andersson, Gerhard Y1 - 2012*.
  58. Andersson G. *Psykologisk behandling vid depression: teorier, terapimetoder och forskning*. 2012.
  59. Barak A, Hen L, Boniel-Nissim M, Shapira Na. A comprehensive review and a meta-analysis of the effectiveness of internet-based psychotherapeutic interventions. *Journal of Technology in Human Services* 2008;26(2-4):109-60.
  60. Hedman E, Ljótsson B, Kaldø V, Hesser H, El Alaoui S, Kraepelien M, et al. Effectiveness of Internet-based cognitive behaviour therapy for depression in routine psychiatric care. *Journal of Affective Disorders* 2013.
  61. Vessey JT, Howard KI. Who seeks psychotherapy? *Psychotherapy: Theory, Research, Practice, Training* 1993;30(4):546.
  62. Howard KI, Cornille TA, Lyons JS, Vessey JT. Patterns of mental health service utilization. *Archives of General Psychiatry* 1996.

1  
2  
3  
4  
5  
6  
7  
8  
9  
10  
11  
12  
13  
14  
15  
16  
17  
18  
19  
20  
21  
22  
23  
24  
25  
26  
27  
28  
29  
30  
31  
32  
33  
34  
35  
36  
37  
38  
39  
40  
41  
42  
43  
44  
45  
46  
47  
48  
49  
50  
51  
52  
53  
54  
55  
56  
57  
58  
59  
60

For peer review only

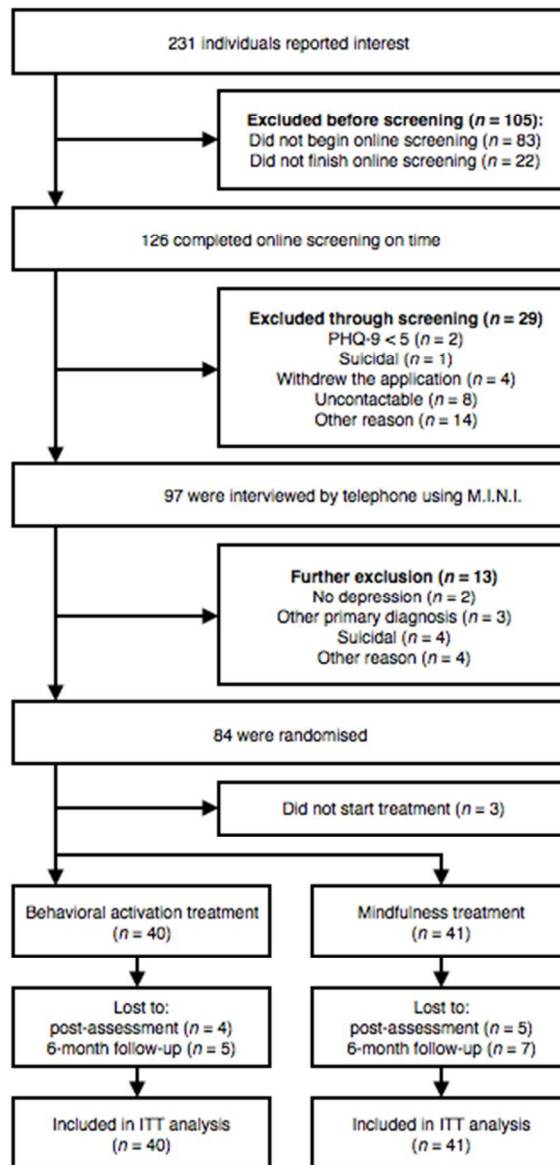

176x249mm (72 x 72 DPI)

1  
2  
3  
4  
5  
6  
7  
8  
9  
10  
11  
12  
13  
14  
15  
16  
17  
18  
19  
20  
21  
22  
23  
24  
25  
26  
27  
28  
29  
30  
31  
32  
33  
34  
35  
36  
37  
38  
39  
40  
41  
42  
43  
44  
45  
46  
47  
48  
49  
50  
51  
52  
53  
54  
55  
56  
57  
58  
59  
60



176x249mm (72 x 72 DPI)

1  
2  
3  
4  
5  
6  
7  
8  
9  
10  
11  
12  
13  
14  
15  
16  
17  
18  
19  
20  
21  
22  
23  
24  
25  
26  
27  
28  
29  
30  
31  
32  
33  
34  
35  
36  
37  
38  
39  
40  
41  
42  
43  
44  
45  
46  
47  
48  
49  
50  
51  
52  
53  
54  
55  
56  
57  
58  
59  
60

.....

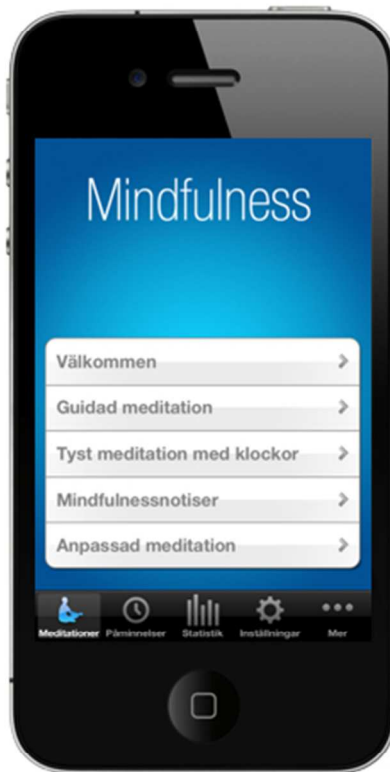

.....

176x249mm (72 x 72 DPI)

**Table 1.** Demographic description of the participants at randomization.

|                                           |                             | <b>Behavioral activation<br/>(N = 40)</b> | <b>Mindfulness<br/>(N = 41)</b> | <b>Total<br/>(N = 81)</b> |
|-------------------------------------------|-----------------------------|-------------------------------------------|---------------------------------|---------------------------|
| <b>Age</b>                                | Mean (SD)                   | 36.6 (10.5)                               | 35.6 (11.3)                     | 36.1 (10.8)               |
|                                           | Min-Max                     | 20-59                                     | 21-61                           | 20-61                     |
| <b>Gender</b>                             | Female                      | 28 (70 %)                                 | 29 (70.7 %)                     | 57 (70 %)                 |
|                                           | Male                        | 12 (30 %)                                 | 12 (29.3 %)                     | 24 (30 %)                 |
| <b>Marital status</b>                     | Single                      | 15 (37.5 %)                               | 15 (36.6 %)                     | 30 (37 %)                 |
|                                           | Married                     | 19 (47.5 %)                               | 24 (58.6 %)                     | 43 (53.2 %)               |
|                                           | Divorced/widow/widower      | 5 (12.5 %)                                | 1 (2.4 %)                       | 6 (7.4 %)                 |
|                                           | Other                       | 1 (2.5 %)                                 | 1 (2.4 %)                       | 2 (2.4 %)                 |
| <b>Highest educational level</b>          | Nine year compulsory school | 1 (2.5 %)                                 | 2 (4.9 %)                       | 3 (3.8 %)                 |
|                                           | Secondary school            | 11 (27.5 %)                               | 14 (34.1 %)                     | 25 (30.9 %)               |
|                                           | College/university          | 27 (67.5 %)                               | 24 (58.5 %)                     | 51 (63 %)                 |
|                                           | Other                       | 1 (2.5 %)                                 | 1 (2.4 %)                       | 2 (2.5 %)                 |
| <b>Employment status</b>                  | Employed/student            | 35 (87.5 %)                               | 30 (73.2 %)                     | 65 (80.2 %)               |
|                                           | Unemployed                  | 3 (7.5 %)                                 | 3 (7.3 %)                       | 6 (7.4 %)                 |
|                                           | Retired                     | 0 (0 %)                                   | 1 (2.4 %)                       | 1 (1.2 %)                 |
|                                           | Other                       | 2 (6.3 %)                                 | 7 (17.1 %)                      | 9 (11.1 %)                |
| <b>Type of Smartphone</b>                 | Iphone                      | 24 (60 %)                                 | 23 (56.1 %)                     | 47 (58 %)                 |
|                                           | Android                     | 16 (40 %)                                 | 18 (43.9 %)                     | 34 (42 %)                 |
| <b>Medication</b>                         | Yes, earlier                | 10 (25 %)                                 | 13 (31.7 %)                     | 23 (28.4 %)               |
|                                           | Yes, present                | 12 (30 %)                                 | 14 (34.1 %)                     | 26 (32.1 %)               |
|                                           | None                        | 18 (45 %)                                 | 14 (34.1 %)                     | 32 (39.5 %)               |
| <b>Psychological treatment</b>            | Yes, earlier                | 19 (47.5 %)                               | 23 (56.1 %)                     | 42 (51.9 %)               |
|                                           | None                        | 21 (52.5 %)                               | 18 (43.9 %)                     | 39 (48.1 %)               |
| <b>Experience of self-help literature</b> | Yes                         | 12 (30 %)                                 | 13 (31.7 %)                     | 25 (30.9 %)               |
|                                           | None                        | 28 (70 %)                                 | 28 (68.3 %)                     | 56 (69.1 %)               |
| <b>Diagnosis</b>                          | Depression                  | 34 (85 %)                                 | 32 (78 %)                       | 66 (82.5 %)               |
|                                           | With dysthymia              | 22 (55 %)                                 | 18 (44 %)                       | 40 (49 %)                 |
|                                           | Earlier episodes            | 31 (77.5 %)                               | 34 (83 %)                       | 65 (80 %)                 |
|                                           | Panic disorder              | 1 (2.5 %)                                 | 3 (7.5 %)                       | 4 (5 %)                   |
|                                           | Social phobia               | 6 (15 %)                                  | 7 (17 %)                        | 13 (16 %)                 |
|                                           | GAD                         | 19 (47.5 %)                               | 10 (24.5 %)                     | 29 (36 %)                 |

**Table 2.** List of behaviors in the database.

**Everyday structure**

Get out of bed when the bell rings in the morning  
Take a shower  
Get ready in the morning  
Eat breakfast  
Read the newspaper  
Make a meal plan for each day of the week  
Make a shopping list for meals  
Buy food for the meals you have planned  
Prepare a simple meal  
Clean a part of my home  
Clean at least 15 minutes  
Washing dishes immediately after a meal  
Wash my clothes  
Plan my TV viewing from TV schedules  
Turn off the TV before 21:00 if I'm still watching TV  
Turn off the computer before 21:00 if I'm still on the Internet  
Take a brisk walk for 10 minutes  
Log in to my online banking and pay a bill  
Entering my weekly activities in my calendar

**Social behaviors**

Texting a friend and ask what he / she does  
Call a friend and ask what the situation is  
Take a walk with a friend  
Book a meeting with someone in my family  
Suggest a coffee with a friend or family member  
Suggest a lunch with a friend or family member  
Go to the playground with my kids  
Bake something with my children  
Meet a friend in the evening and ask how your day was  
Watching an episode of a TV series with a friend  
Go to the movies with a friend  
Cooking with someone

**New activities**

Buy or borrow a book I wanted to read  
Read at least 20 minutes out of a book  
Go to a new cafe and coffee  
Look up the nearest training center is  
Read on about training online  
Post a workout plan for the week  
Ask a friend if he / she wants to come along and train  
Spend at least 30 minutes of physical activity  
Listen to a radio program  
Watch a documentary on TV  
Eat a good meal out  
Write down at least two good things that happened around me  
Rent a movie and have a night in  
Look up the exhibits that are in my city  
See an exhibition at a museum  
Look up the concerts that are relevant right now  
Go to a concert  
Look up current things happening in my city  
Attend a church service  
Solve a crossword  
Make a Sudoku  
Listen to music without doing anything else and focus on what I hear  
Go to town and buy something nice for myself



**Table 3.** Means, SDs and effect sizes (Cohen's *d*) for measures of depression, anxiety, psychological flexibility and quality of life.

| Outcome measure | Mean (SD)     |                |                   | Effect size, <i>d</i> (95% CI) |                        |                        |                       |
|-----------------|---------------|----------------|-------------------|--------------------------------|------------------------|------------------------|-----------------------|
|                 | Pre-treatment | Post-treatment | 6-month follow-up | Between-group, pre-post        | Between-group, pre-6FU | Within-group, pre-post | Within-group, pre-6FU |
| Total           |               |                |                   |                                |                        |                        |                       |
| BDI-II          |               |                |                   |                                |                        |                        |                       |
| BA              | 23.50 (7.85)  | 10.89 (5.92)   | 12.71 (10.56)     | 0.25                           | 0.03                   | 1.83 (0.27-3.38)**     | 1.19 (-0.87-3.24)**   |
| MF              | 24.68 (9.47)  | 12.94 (10.18)  | 13.09 (12.24)     | (-1.65-2.15)                   | (-2.63-2.69)           | 1.21 (-0.95-3.38)**    | 1.09 (-1.32-3.50)**   |
| PHQ-9           |               |                |                   |                                |                        |                        |                       |
| BA              | 12.53 (4.43)  | 5.83 (3.85)    | 6.77 (5.83)       | 0.28                           | 0.15                   | 1.63 (0.71-2.56)**     | 1.14 (-0.01-2.28)**   |
| MF              | 13.22 (4.81)  | 7.19 (5.84)    | 7.74 (7.33)       | (-0.85-1.40)                   | (-1.39-1.69)           | 1.15 (-0.02-2.32)**    | 0.91 (-0.44-2.27)**   |
| BAI             |               |                |                   |                                |                        |                        |                       |
| BA              | 14.60 (9.09)  | 8.81 (5.77)    | 8.34 (8.50)       | 0.06                           | 0.01                   | 0.76 (-0.95-2.47)**    | 0.72 (-1.25-2.69)**   |
| MF              | 13.51 (9.31)  | 9.22 (7.68)    | 8.38 (7.48)       | (-1.49-1.61)                   | (-1.86-1.87)           | 0.51 (-1.39-2.40)**    | 0.61 (-1.30-2.51)**   |
| AAQ-II          |               |                |                   |                                |                        |                        |                       |
| BA              | 27.28 (7.05)  | 21.22 (8.24)   | 20.09 (9.28)      | 0.22                           | 0.10                   | 0.80 (-0.89-2.50)**    | 0.89 (-0.93-2.72)**   |
| MF              | 28.22 (7.09)  | 23.32 (10.82)  | 21.03 (9.68)      | (-1.97-2.41)                   | (-2.10-2.31)           | 0.56 (-1.44-2.54)*     | 0.87 (-1.00-2.74)**   |
| QoLI            |               |                |                   |                                |                        |                        |                       |
| BA              | -0.45 (1.38)  | 0.92 (1.66)    | 1.15 (2.40)       | 0.05                           | 0.01                   | 0.91 (0.58-1.25)**     | 0.84 (0.41-1.27)**    |
| MF              | -0.20 (1.51)  | 0.84 (1.90)    | 1.13 (2.07)       | (-0.36-0.45)                   | (-0.53-0.51)           | 0.62 (0.24-0.99)**     | 0.75 (0.36-1.15)**    |
| H-L Dep         |               |                |                   |                                |                        |                        |                       |
| BDI-II          |               |                |                   |                                |                        |                        |                       |
| BA              | 26.87 (7.14)  | 12.00 (6.31)   | 11.81 (10.63)     | 0.42                           | 0.39                   | 2.25 (0.33-4.18)**     | 1.72 (-0.87-4.31)**   |
| MF              | 28.00 (8.61)  | 15.68 (10.76)  | 16.28 (12.71)     | (-2.09-2.93)                   | (-2.95-3.73)           | 1.62 (-0.44-3.67)**    | 1.32 (-1.07-3.71)**   |
| PHQ-9           |               |                |                   |                                |                        |                        |                       |
| BA              | 15.52 (3.29)  | 6.64 (4.42)    | 6.48 (5.59)       | 0.36                           | 0.47                   | 2.34 (1.23-3.45)**     | 2.04 (0.73-3.35)**    |
| MF              | 15.57 (3.35)  | 8.60 (6.29)    | 9.60 (7.71)       | (-1.17-1.90)                   | (-1.46-2.40)*          | 1.43 (0.13-2.74)**     | 1.05 (-0.49-2.58)**   |
| BAI             |               |                |                   |                                |                        |                        |                       |
| BA              | 17.43 (9.37)  | 9.18 (6.68)    | 9.62 (8.91)       | 0.20                           | 0.01                   | 1.03 (-1.30-3.37)**    | 0.87 (-1.77-3.52)**   |
| MF              | 15.57 (9.39)  | 10.68 (8.39)   | 9.72 (7.91)       | (-1.94-2.34)                   | (-2.36-2.38)           | 0.56 (-1.80-2.92)*     | 0.68 (-1.62-2.99)**   |
| AAQ-II          |               |                |                   |                                |                        |                        |                       |
| BA              | 28.27 (7.21)  | 21.68 (8.90)   | 19.33 (9.27)      | 0.44                           | 0.47                   | 0.83 (-1.47-3.14)**    | 1.11 (-1.28-3.49)**   |
| MF              | 29.04 (6.50)  | 25.87 (10.52)  | 23.56 (9.33)      | (-2.30-3.18)                   | (-2.16-3.09)           | 0.38 (-1.90-2.65)      | 0.70 (-1.40-2.80)*    |
| QoLI            |               |                |                   |                                |                        |                        |                       |
| BA              | -0.51 (1.30)  | 0.78 (1.58)    | 1.25 (2.07)       | 0.26                           | 0.34                   | 0.91 (0.50-1.33)**     | 1.05 (0.56-1.55)**    |
| MF              | -0.71 (1.18)  | 0.38 (1.58)    | 0.53 (2.23)       | (-0.70-0.18)                   | (-0.95-0.27)           | 0.80 (0.44-1.17)**     | 0.72 (0.26-1.18)**    |
| L-L Dep         |               |                |                   |                                |                        |                        |                       |
| BDI-II          |               |                |                   |                                |                        |                        |                       |
| BA              | 18.94 (6.47)  | 9.14 (4.96)    | 14.07 (10.71)     | -0.51                          | -1.21                  | 1.74 (-0.25-3.72)**    | 0.58 (-2.36-3.52)     |
| MF              | 17.54 (7.09)  | 6.73 (4.86)    | 4.22 (3.63)       | (-2.36-1.34)                   | (-4.13-1.71)*          | 1.83 (-0.54-4.19)**    | 2.35 (-0.03-4.72)**   |
| PHQ-9           |               |                |                   |                                |                        |                        |                       |
| BA              | 8.47 (1.59)   | 4.57 (2.34)    | 7.21 (6.36)       | -0.23                          | -0.98                  | 2.06 (1.39-2.72)**     | 0.30 (-1.21-1.80)     |
| MF              | 8.15 (3.34)   | 4.00 (2.86)    | 2.56 (1.51)       | (-1.20-0.74)                   | (-2.68-0.72)**         | 1.38 (0.19-2.59)**     | 2.13 (1.03-3.23)**    |
| BAI             |               |                |                   |                                |                        |                        |                       |
| BA              | 10.76 (7.33)  | 8.21 (4.10)    | 6.43 (7.80)       | -0.56                          | -0.27                  | 0.43 (-1.64-2.51)      | 0.59 (-1.98-3.16)     |
| MF              | 9.08 (7.70)   | 5.91 (4.48)    | 4.67 (4.64)       | (-2.17-1.04)                   | (-2.92-2.38)           | 0.51 (-1.95-2.98)      | 0.67 (-1.95-3.34)**   |
| AAQ-II          |               |                |                   |                                |                        |                        |                       |
| BA              | 26.00 (6.85)  | 20.50 (7.34)   | 21.21 (9.54)      | -0.37                          | -0.87                  | 0.80 (-1.61-3.21)**    | 0.61 (-2.17-3.39)     |
| MF              | 26.46 (8.21)  | 17.52 (9.54)   | 14.00 (7.07)      | (-3.52-2.78)                   | (-4.26-2.52)           | 1.06 (-2.33-4.44)*     | 1.68 (-1.42-4.78)**   |
| QoLI            |               |                |                   |                                |                        |                        |                       |
| BA              | -0.37 (1.52)  | 1.14 (1.83)    | 0.97 (2.15)       | -0.38                          | -0.93                  | 0.94 (0.37-1.50)**     | 0.76 (0.13-1.38)*     |
| MF              | 0.89 (1.61)   | 1.87 (2.24)    | 2.87 (2.10)       | (-0.38-1.14)                   | (-1.77-0.10)           | 0.53 (-0.20-1.27)      | 1.14 (0.41-1.87)      |

Abbreviations: BA: Behavioral activation; MF: Mindfulness; H-L Dep: High-level depression; L-L Dep: Low-level depression; BDI-II: Beck Depression Inventory-II; PHQ-9: 9-item Patient Health Questionnaire Depression Scale; BAI: Beck Anxiety Inventory; AAQ-II: Acceptance and Action Questionnaire; QOLI: Quality of Life Inventory.

\*  $p < 0.05$ .

\*\*  $p < 0.01$ .

CONSORT 2010 Flow Diagram

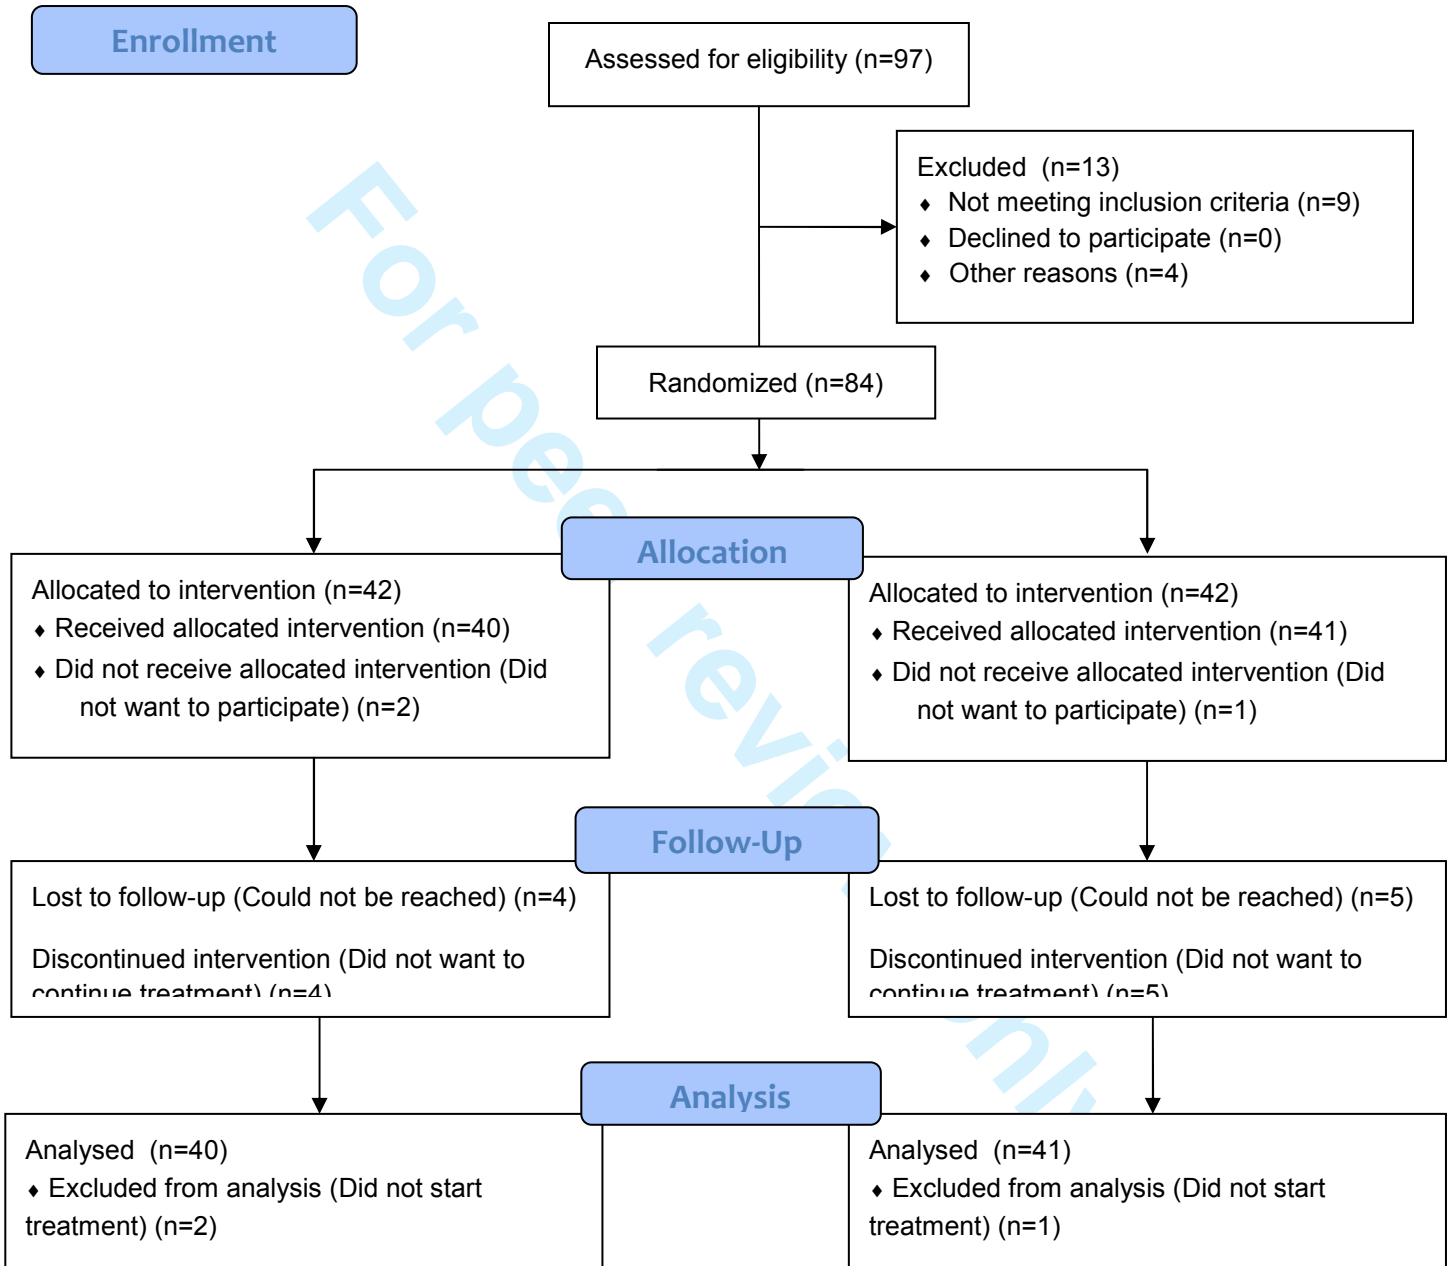

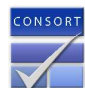

## CONSORT 2010 checklist of information to include when reporting a randomised trial\*

| Section/Topic                    | Item No | Checklist item                                                                                                                                                                              | Reported on page No |
|----------------------------------|---------|---------------------------------------------------------------------------------------------------------------------------------------------------------------------------------------------|---------------------|
| <b>Title and abstract</b>        |         |                                                                                                                                                                                             |                     |
|                                  | 1a      | Identification as a randomised trial in the title                                                                                                                                           | 1                   |
|                                  | 1b      | Structured summary of trial design, methods, results, and conclusions (for specific guidance see CONSORT for abstracts)                                                                     | 2-3                 |
| <b>Introduction</b>              |         |                                                                                                                                                                                             |                     |
| Background and objectives        | 2a      | Scientific background and explanation of rationale                                                                                                                                          | 3-5                 |
|                                  | 2b      | Specific objectives or hypotheses                                                                                                                                                           | 5                   |
| <b>Methods</b>                   |         |                                                                                                                                                                                             |                     |
| Trial design                     | 3a      | Description of trial design (such as parallel, factorial) including allocation ratio                                                                                                        | 7                   |
|                                  | 3b      | Important changes to methods after trial commencement (such as eligibility criteria), with reasons                                                                                          | N/A                 |
| Participants                     | 4a      | Eligibility criteria for participants                                                                                                                                                       | 5                   |
|                                  | 4b      | Settings and locations where the data were collected                                                                                                                                        | 7                   |
| Interventions                    | 5       | The interventions for each group with sufficient details to allow replication, including how and when they were actually administered                                                       | 7-8                 |
| Outcomes                         | 6a      | Completely defined pre-specified primary and secondary outcome measures, including how and when they were assessed                                                                          | 6                   |
|                                  | 6b      | Any changes to trial outcomes after the trial commenced, with reasons                                                                                                                       | N/A                 |
| Sample size                      | 7a      | How sample size was determined                                                                                                                                                              | 9                   |
|                                  | 7b      | When applicable, explanation of any interim analyses and stopping guidelines                                                                                                                | N/A                 |
| Randomisation:                   |         |                                                                                                                                                                                             |                     |
| Sequence generation              | 8a      | Method used to generate the random allocation sequence                                                                                                                                      | 7                   |
|                                  | 8b      | Type of randomisation; details of any restriction (such as blocking and block size)                                                                                                         | 7                   |
| Allocation concealment mechanism | 9       | Mechanism used to implement the random allocation sequence (such as sequentially numbered containers), describing any steps taken to conceal the sequence until interventions were assigned | 7                   |
| Implementation                   | 10      | Who generated the random allocation sequence, who enrolled participants, and who assigned participants to interventions                                                                     | 7                   |
| Blinding                         | 11a     | If done, who was blinded after assignment to interventions (for example, participants, care providers, those assessing outcomes) and how                                                    | 6                   |

|    |                          |     |                                                                                                                  |
|----|--------------------------|-----|------------------------------------------------------------------------------------------------------------------|
| 1  |                          |     |                                                                                                                  |
| 2  |                          |     |                                                                                                                  |
| 3  |                          | 11b | If relevant, description of the similarity of interventions                                                      |
| 4  | Statistical methods      | 12a | Statistical methods used to compare groups for primary and secondary outcomes                                    |
| 5  |                          | 12b | Methods for additional analyses, such as subgroup analyses and adjusted analyses                                 |
| 6  |                          |     |                                                                                                                  |
| 7  | <b>Results</b>           |     |                                                                                                                  |
| 8  | Participant flow (a      | 13a | For each group, the numbers of participants who were randomly assigned, received intended treatment, and         |
| 9  | diagram is strongly      |     | were analysed for the primary outcome                                                                            |
| 10 | recommended)             | 13b | For each group, losses and exclusions after randomisation, together with reasons                                 |
| 11 | Recruitment              | 14a | Dates defining the periods of recruitment and follow-up                                                          |
| 12 |                          | 14b | Why the trial ended or was stopped                                                                               |
| 13 |                          |     |                                                                                                                  |
| 14 | Baseline data            | 15  | A table showing baseline demographic and clinical characteristics for each group                                 |
| 15 | Numbers analysed         | 16  | For each group, number of participants (denominator) included in each analysis and whether the analysis was      |
| 16 |                          |     | by original assigned groups                                                                                      |
| 17 |                          |     |                                                                                                                  |
| 18 | Outcomes and             | 17a | For each primary and secondary outcome, results for each group, and the estimated effect size and its            |
| 19 | estimation               |     | precision (such as 95% confidence interval)                                                                      |
| 20 |                          | 17b | For binary outcomes, presentation of both absolute and relative effect sizes is recommended                      |
| 21 | Ancillary analyses       | 18  | Results of any other analyses performed, including subgroup analyses and adjusted analyses, distinguishing       |
| 22 |                          |     | pre-specified from exploratory                                                                                   |
| 23 |                          |     |                                                                                                                  |
| 24 | Harms                    | 19  | All important harms or unintended effects in each group (for specific guidance see CONSORT for harms)            |
| 25 |                          |     |                                                                                                                  |
| 26 | <b>Discussion</b>        |     |                                                                                                                  |
| 27 | Limitations              | 20  | Trial limitations, addressing sources of potential bias, imprecision, and, if relevant, multiplicity of analyses |
| 28 | Generalisability         | 21  | Generalisability (external validity, applicability) of the trial findings                                        |
| 29 | Interpretation           | 22  | Interpretation consistent with results, balancing benefits and harms, and considering other relevant evidence    |
| 30 |                          |     |                                                                                                                  |
| 31 | <b>Other information</b> |     |                                                                                                                  |
| 32 | Registration             | 23  | Registration number and name of trial registry                                                                   |
| 33 | Protocol                 | 24  | Where the full trial protocol can be accessed, if available                                                      |
| 34 | Funding                  | 25  | Sources of funding and other support (such as supply of drugs), role of funders                                  |
| 35 |                          |     |                                                                                                                  |

\*We strongly recommend reading this statement in conjunction with the CONSORT 2010 Explanation and Elaboration for important clarifications on all the items. If relevant, we also recommend reading CONSORT extensions for cluster randomised trials, non-inferiority and equivalence trials, non-pharmacological treatments, herbal interventions, and pragmatic trials. Additional extensions are forthcoming: for those and for up to date references relevant to this checklist, see [www.consort-statement.org](http://www.consort-statement.org).
